# Supplementary material for: Proteomic and Biochemical Approaches Elucidate the Role of Millimeter-Wave Irradiation in Wheat Growth under Flooding Stress
Source: Int J Mol Sci. 2022 Sep 8;23(18):10360. doi: 10.3390/ijms231810360 (PMC9499361; doi:10.3390/ijms231810360)
Supplement: Supplementary file 1 [file ijms-23-10360-s001.zip › rev Supplemental Tables S2-5.xlsx]

## Sheet: Table S2
Table S2: List of significantly changed proteins in wheat roots between irradiation and unirradiation with millimeter waves under non-flooding.
#NAME?	p-valuse	Difference	Accession	Protein names	Gene names	Coverage in Percent	Number of Peptides	Number of AAs	MW in kDa	calc pI	Biological Process	Cellular Component	Molecular Function
1.52066	0.0301538	5.9813	A0A3B6PIM0	Peroxidase (EC 1.11.1.7)		11	2	332	34.3	6.13
1.54472	0.0285284	5.61755	P01544	Acidic protein] (Fragment);Alpha-1-purothionin (Purothionin A-II) [Cleaved into: Alpha-1-purothionin	THI1.1 PUR-D1	48	6	126	13.5	4.88	defense response;response to stimulus	extracellular
1.4803	0.0330901	4.48335	P93692	Serpin-Z2B (TriaeZ2b) (WSZ2b) (WZS3)		40	9	398	43	5.33	regulation of biological process		enzyme regulator activity
2.71869	0.00191121	4.4293	A0A3B6QIH5	Uncharacterized protein		5	2	702	77.6	7.08
1.98631	0.0103203	4.28786	A0A3B6QH86	Cytochrome b-c1 complex subunit Rieske, mitochondrial (EC 7.1.1.8)		21	5	270	29.6	8.07
2.71975	0.00190656	4.26525	A0A3B6MNM8	AMP-binding domain-containing protein		19	9	698	76.7	6.62
2.11986	0.00758831	4.15732	I3NM30	Putative non-cyanogenic beta-glucosidase	4N5.4	40	13	507	56.4	8.98	metabolic process		catalytic activity;protein binding
2.35583	0.00440727	4.1518	A0A3B6SS66	Uncharacterized protein		13	2	395	43	5.66
2.20016	0.0063073	4.01519	A0A3B5YUV2	Uncharacterized protein		57	11	292	30.7	7.59
2.62357	0.00237917	3.98392	A0A3B6GY19	YTH domain-containing protein		5	2	688	75	6.01
2.25442	0.00556649	3.87519	A0A3B5ZTK0	Ubiquitin-like domain-containing protein		12	3	354	38.2	6.57
1.65812	0.0219723	3.78644	A0A3B6TZ27	Protein kinase domain-containing protein		9	2	309	35.2	5.19
1.77081	0.0169507	3.64661	A0A3B6PI86	Uncharacterized protein		40	8	372	39.5	9.44
1.38228	0.0414691	3.5248	A0A3B6H360	WPP domain-containing protein		59	22	554	59.9	4.64
2.63615	0.00231129	3.5179	A0A3B6CGC5	Uncharacterized protein		8	5	723	81.1	8.79
2.81462	0.00153241	3.43044	A0A3B6GNU6	Uncharacterized protein		2	2	1832	201.3	6.61
1.7115	0.019431	3.42251	A4UIY8	HPPK/DHPS	CAMPLR22A2D_LOCUS1562	8	2	530	57.9	6.99	metabolic process		catalytic activity
2.55819	0.00276571	3.42037	A0A3B6GX20	Cysteine proteinase inhibitor		47	5	142	15.7	6.58
1.51238	0.0307339	3.36483	A0A3B6SJW9	Uncharacterized protein		7	2	549	59.8	5.92
2.00561	0.00987157	3.36086	A0A3B5ZWE9	Hydrolase_4 domain-containing protein		6	2	590	64.7	7.24
1.87483	0.0133405	3.3114	A0A3B6IXZ4	Uncharacterized protein		4	2	1046	119.1	5.78
1.36435	0.0432161	3.29894	A0A3B6KPH4	Uncharacterized protein		30	2	143	14.6	8.38
3.03563	0.000921225	3.15507	A0A3B6QDY7	Uncharacterized protein		9	2	484	53.4	7.97
2.07529	0.00840832	3.0728	A0A3B6EFW5	Uncharacterized protein		36	7	368	39.9	6.74
1.94667	0.0113065	3.06373	A0A3B6A2B6	AAA domain-containing protein		7	2	505	57.4	5.76
3.57978	0.000263158	2.98231	A0A3B6THU9	Uncharacterized protein		5	2	555	62	5.63
1.56556	0.0271917	2.92931	A0A3B6FHZ6	BOWMAN_BIRK domain-containing protein		16	2	219	23.7	5.57
2.1402	0.007241	2.90168	A0A3B6SDN7	Proteasome subunit alpha type (EC 3.4.25.1)		47	7	250	26.9	6.79
4.50642	3.11588e-05	2.88606	A0A3B6B2Q2	Uncharacterized protein		9	3	481	51	7.84
4.19987	6.3115e-05	2.832	A0A3B6KM07	Hydrolase_4 domain-containing protein		7	2	373	41.7	6.54
1.77972	0.0166067	2.81183	A0A3B6B810	Uncharacterized protein		20	2	255	27.5	6.77
1.45442	0.0351218	2.7727	A0A3B6PLS2	tRNA_edit domain-containing protein		15	2	233	26	5.17
2.11048	0.00775385	2.71912	A0A3B6PLX2	UVR domain-containing protein		39	24	916	101.4	6.16
2.40556	0.00393043	2.70724	A0A3B6LNW7	BZIP domain-containing protein		14	3	377	41.1	7.25
1.6618	0.0217872	2.67163	A0A3B6J081	PH domain-containing protein		30	7	483	52.4	5.07
2.10756	0.00780629	2.62767	A0A3B5ZRC9	Uncharacterized protein		16	5	435	47	5.68
1.37036	0.0426226	2.62035	A0A0N7ILR9	Modifier of transcription 1-D1	MOT1-D1	1	2	2069	229.4	6.05			nucleotide binding;protein binding
1.76201	0.0172978	2.5833	A0A077RXT0	Uncharacterized protein	TRAES_3BF152900010CFD_c1	5	4	1783	203	7.11
1.31595	0.0483114	2.53085	A0A3B6IXG9	Uncharacterized protein		25	5	276	30.2	9.07
2.31977	0.00478888	2.52824	A0A3B6A207	Uncharacterized protein		22	4	336	34.6	8.63
1.55064	0.0281426	2.4488	A0A077S0B2	Uncharacterized protein	TRAES_3BF092700010CFD_c1	14	4	515	57.1	5.31	metabolic process		catalytic activity
1.56937	0.0269546	2.40651	A0A3B6CD28	Uncharacterized protein		21	6	469	50.2	6.54
1.31347	0.0485883	2.38381	A0A3B6TF52	Structural maintenance of chromosomes protein		11	9	1222	139.5	7.71
1.35444	0.0442143	2.37077	A0A3B6HTZ3	KOW domain-containing protein		27	2	159	17.6	10.11
1.33905	0.0458094	2.36981	A0A3B6PPF8	TPR_REGION domain-containing protein		6	3	821	93.3	6.09
1.31122	0.0488404	2.30172	A0A3B6LHI2	Uncharacterized protein		15	4	445	49.9	7.12
1.34842	0.044831	2.28862	A0A3B6KQT3	FeS_assembly_P domain-containing protein		17	2	153	16.9	5.68
1.499	0.0316956	2.26938	A0A3B6SRT9	RanBD1 domain-containing protein		16	5	496	52.5	4.96
1.59303	0.0255254	2.26785	A0A3B6IQ73	Uncharacterized protein		20	2	254	28.1	5.76
1.47348	0.0336143	2.22957	A0A3B6CD87	Uncharacterized protein		31	7	436	47.2	6.15
1.39653	0.0401305	2.21945	A0A3B6MUC8	SAM_MT_RSMB_NOP domain-containing protein		26	15	873	97.4	5.67
1.72649	0.018772	2.18194	A0A7H4LRA6			7	3	723	81.3	6.51
1.92821	0.0117975	2.17061	A0A3B6TNV8	Glycosyltransferase (EC 2.4.1.-)		22	7	475	50.6	5.69
2.18431	0.00654164	2.1506	A0A3B5XVG6	Mitogen-activated protein kinase (EC 2.7.11.24)		8	3	549	62.3	8.53
4.37396	4.22705e-05	2.14373	A0A3B6KL37	CN hydrolase domain-containing protein		29	6	411	45.6	6.48
1.38806	0.0409206	2.13287	A0A1B5GEW3	Caleosin	Clo9	43	7	234	26	7.69
1.93282	0.0116729	2.10181	A0A3B5ZNF2	HDAC_interact domain-containing protein		4	3	1337	150.4	5.94
1.33426	0.0463174	2.07776	A0A3B6RL96	Bms1-type G domain-containing protein		8	4	787	88.1	7.4
1.58669	0.0259004	2.02732	A0A3B6C3N8	Uncharacterized protein		5	2	516	57.4	9.36
1.37672	0.0420026	2.01102	A0A3B6H093	KH domain-containing protein		11	2	294	33.1	8.68
2.09467	0.00804145	1.95552	A0A3B6T7X8	Uncharacterized protein		23	4	280	31.9	7.91
1.74694	0.0179086	1.8821	A0A3B6PH56	Uncharacterized protein		3	2	805	87.9	6.92
1.48276	0.0329037	1.87468	A0A3B6QGW2	Cytosolic Fe-S cluster assembly factor NBP35	NBP35	34	7	348	37.1	5.14
1.80553	0.0156486	1.83868	A0A3B6HUK1	Fe2OG dioxygenase domain-containing protein		14	3	313	34.8	4.96
1.46075	0.0346138	1.81285	A0A3B5XZK5	Uncharacterized protein		6	5	1386	154.9	5.43
1.40682	0.0391909	1.78941	A0A3B6KR91	GLTP domain-containing protein		15	2	206	22.5	9.16
2.52275	0.00300086	1.7641	A0A3B5Y3E5	Uncharacterized protein		22	7	658	71.6	5.86
1.63074	0.0234025	1.74602	A0A3B6HRZ3	Phosphoserine aminotransferase (EC 2.6.1.52)		31	9	416	44	8.59
1.32567	0.0472416	1.72466	A0A3B6MRG8	Uncharacterized protein		12	4	691	76.2	6.95
1.42801	0.0373242	1.68056	A0A3B6LJU1	Uncharacterized protein		6	2	676	73.7	6.54
1.74831	0.0178523	1.67013	A0A3B6AUN8	Uncharacterized protein		16	4	482	53.5	9.92
1.53728	0.0290214	1.6566	A0A3B6SDK6	Uncharacterized protein		4	2	556	62.4	4.83
2.43027	0.00371308	1.65288	A0A3B6C4Q9	ANK_REP_REGION domain-containing protein		4	2	741	82.6	8.72
3.05079	0.000889629	1.65201	A0A3B5Z2Y6	Uncharacterized protein		4	6	2014	230.2	7.17
1.56099	0.0274796	1.63058	A0A3B6FQ67	HTH arsR-type domain-containing protein		3	4	2682	302.8	7.99
1.95588	0.0110692	1.58037	A0A3B6MNB6	Uncharacterized protein		5	2	538	57.5	9.72
1.71231	0.0193952	1.56382	A0A3B6PUK0	ABC transporter domain-containing protein		27	4	291	32.6	6.44
2.04548	0.00900575	1.56089	A0A3B5ZR06	Usp domain-containing protein		77	7	166	17.8	6.54
2.055	0.00881045	1.55896	A0A3B6NUW2	CULLIN_2 domain-containing protein		10	6	736	85.4	7.34
1.32581	0.0472275	1.51765	A0A3B6PHC1	Uncharacterized protein		16	3	252	27.1	9.41
1.41573	0.0383946	1.49557	A0A3B6QHA9	Cupin_5 domain-containing protein		46	5	194	21.5	5.5
1.59317	0.025517	1.49392	A0A3B6H114	CTLH domain-containing protein		8	2	386	43.6	6.15
1.90275	0.0125099	1.47218	A0A3B6MYV4	Uncharacterized protein		25	4	362	39.7	4.79
1.56173	0.0274331	1.45806	W5B1P6	PPM-type phosphatase domain-containing protein		57	12	290	31.8	6.48	metabolic process		catalytic activity
1.42099	0.0379325	1.42505	A0A3B6SNB2	WD_REPEATS_REGION domain-containing protein		23	5	346	38.4	7.8
3.44168	0.000361678	1.4215	A0A3B5Y7X6	CTP synthase (EC 6.3.4.2) (UTP--ammonia ligase)		5	2	604	66.1	8.22
3.12471	0.000750388	1.40226	A0A3B6KR15	DUF2428 domain-containing protein		5	7	2145	239	6.24
2.52709	0.00297104	1.37292	A0A3B5ZVF4	Uncharacterized protein		31	11	603	68.5	7.02
1.75624	0.0175293	1.36336	A0A3B6TVK6	Epimerase domain-containing protein		35	6	322	35	6.39
1.70442	0.0197507	1.33954	A0A341WZG6	Small nuclear ribonucleoprotein Sm D1 (snRNP core protein D1)		31	2	107	11.8	11.02
2.51717	0.00303971	1.33781	A0A3B6QLB4	Uncharacterized protein		28	8	457	48.6	4.98
1.33617	0.0461141	1.32664	A0A3B5ZQT0	Cellulase domain-containing protein		24	9	632	69.4	5.45
1.90905	0.0123297	1.31846	A0A3B5Y3Y4	Poly [ADP-ribose] polymerase (PARP) (EC 2.4.2.-)		14	9	824	91.8	5.29
1.60719	0.0247066	1.27633	A0A3B6MLZ1	Uncharacterized protein		7	2	537	59.1	6.01
2.05613	0.00878767	1.23248	A0A3B6LI23	Uncharacterized protein		26	5	310	33.2	4.74
2.20014	0.00630759	1.23062	A0A3B6QCG2	Uncharacterized protein		2	2	1918	211.6	5.53
2.96534	0.00108307	1.22966	A0A3B6HX88	Uncharacterized protein		60	4	95	11.1	6.55
1.53196	0.0293789	1.22794	A0A3B6NQJ8	Uncharacterized protein		12	2	346	38.9	5.47
1.36643	0.0430104	1.22776	C6ETB2	Peroxidase (EC 1.11.1.7)	Prx113-B	18	4	316	32.9	6.19	metabolic process;response to stimulus	extracellular	antioxidant activity;catalytic activity;metal ion binding
2.47427	0.00335531	1.22154	A0A3B6C850	Lipoyl synthase, mitochondrial (EC 2.8.1.8) (Lipoate synthase) (LS) (Lip-syn) (Lipoic acid synthase)	LIP1	10	2	386	42.1	8.41
2.14016	0.00724171	1.18727	A0A3B6LIH3	Uncharacterized protein		31	8	539	57.9	6.3
1.68156	0.020818	1.14489	A0A3B6LRS2	Uncharacterized protein		3	6	3575	396.7	5.95
2.00706	0.00983876	1.13703	A0A3B5ZTU4	Uncharacterized protein		7	4	1161	129.4	5.69
1.41047	0.038862	1.13619	A0A3B6H4X8	Protein kinase domain-containing protein		3	2	949	104.2	5.88
1.54528	0.0284916	1.12971	A0A3B5XTD4	Uncharacterized protein		30	2	74	7.9	4.72
4.73859	1.8256e-05	1.11433	A0A3B6HY51	Uncharacterized protein		30	49	2621	286.5	7.33
1.54724	0.0283638	1.10645	A0A3B5XWG8	HECT domain-containing protein		13	7	1030	117	6.92
2.00667	0.00984751	1.10608	Q9ZTW6	Histidyl-tRNA synthetase (EC 6.1.1.21) (Fragment)		34	15	479	54	5.45	metabolic process	cytoplasm;cytosol	catalytic activity;nucleotide binding
1.91273	0.0122255	1.07736	A0A3B6CDM1	Epimerase domain-containing protein		21	4	341	36.6	5.21
2.52481	0.00298668	1.0699	A0A3B6ARA1	Vps54 domain-containing protein		19	10	994	108.7	5.95
1.33832	0.0458857	1.06936	W5C732	Uncharacterized protein	CAMPLR22A2D_LOCUS1654	35	2	100	9.8	9.63
1.8902	0.0128766	1.05321	A0A3B6EIE9	Methyltransf_11 domain-containing protein		14	5	505	57.1	5.36
2.09332	0.00806647	1.05175	A0A3B5ZQV8	Serine/threonine-protein phosphatase (EC 3.1.3.16)		20	2	261	29.3	5.3
1.46848	0.0340031	1.03162	A0A3B6QGJ4	Aminopeptidase (EC 3.4.11.-)		51	33	877	98.1	5.49
1.43466	0.0367567	1.03134	A7J2I4	Tonoplast intrinsic protein	AQP5	20	2	249	25.2	6.02	transport	membrane	transporter activity
1.94961	0.0112302	1.02649	A0A6J4BJG4			40	7	373	40.8	5.58
1.31942	0.0479267	1.02291	A0A1D5UGJ7	Peroxidase (EC 1.11.1.7)	CAMPLR22A2D_LOCUS3007	22	4	341	36.8	7.33	metabolic process;response to stimulus	extracellular	antioxidant activity;catalytic activity;metal ion binding
2.01055	0.00975991	1.01045	A0A3B6THH5	RING-type E3 ubiquitin transferase (EC 2.3.2.27)		7	2	602	64.6	6.25
1.67077	0.0213416	0.997384	A0A3B6LT53	Uncharacterized protein		6	4	1272	142.7	6.87
1.59954	0.0251455	0.969231	A0A1D6B0F9	Uncharacterized protein		13	3	204	22.4	7.91
1.45254	0.0352741	0.968664	A0A3B6TYD9	Uncharacterized protein		36	26	1156	130.7	6.37
1.31034	0.0489398	0.968389	A0A3B6I2H3	FKS1_dom1 domain-containing protein		7	9	1914	218.6	8.62
1.35428	0.0442302	0.96045	A0A3B6CH60	F-box domain-containing protein		8	2	411	43.6	9.2
1.34456	0.0452316	0.958896	A0A3B5YUK0	EMC1_C domain-containing protein		32	21	989	109.4	7.14
1.38111	0.0415801	0.93843	A0A3B6ISQ4	Peroxidase (EC 1.11.1.7)		22	5	344	37.7	6.79
1.66424	0.0216651	0.935917	A0A077S1E6	Pyruvate kinase (EC 2.7.1.40)	TRAES_3BF028500040CFD_c1 TRAES_3BF031200070CFD_c1	27	10	577	63	6.4	metabolic process;response to stimulus	mitochondrion	catalytic activity;metal ion binding
2.4823	0.00329384	0.922167	A0A3B6RKM9	Uncharacterized protein		12	3	285	31.1	6.71
1.64715	0.0225345	0.917645	A0A3B6SDN9	Serine/threonine-protein phosphatase 2A activator (EC 5.2.1.8) (Phosphotyrosyl phosphatase activator)		14	2	393	42.4	7.23
2.56808	0.00270346	0.91306	A0A3B6FM34	SMK-1 domain-containing protein		9	4	880	99.4	5.36
1.74078	0.0181642	0.904171	W5C305	Uncharacterized protein	CAMPLR22A2D_LOCUS2334	26	4	296	33	9.54
1.77926	0.0166243	0.896275	A0A3B6B5P1	Uncharacterized protein		71	19	348	38.9	6.64
1.33765	0.045957	0.890006	A0A3B6S9N8	Uncharacterized protein		4	2	845	89.1	6.39
1.52136	0.0301052	0.881831	A0A3B6PVE8	Ubiquitin carboxyl-terminal hydrolase (EC 3.4.19.12)		46	8	339	37.9	5.05
1.5312	0.0294306	0.874235	A0A023JMN5	Nucleoredoxin	NRX	55	19	577	63.7	4.91	cellular homeostasis;metabolic process;regulation of biological process		antioxidant activity;catalytic activity
2.09884	0.00796456	0.862837	A0A3B6EGA8	Uncharacterized protein		47	32	1172	127.5	6.1
1.64694	0.0225454	0.834715	A0A3B6QF80	Uncharacterized protein		19	13	991	109.9	6.4
1.53745	0.0290104	0.831197	A0A3B6EAT0	TPR_REGION domain-containing protein		4	2	725	82	8.12
1.35603	0.0440529	0.825553	A0A3B6LV48	Uncharacterized protein		56	4	153	17.3	10.13
1.57873	0.0263794	0.820517	A0A3B6NIK2	Uncharacterized protein		13	6	703	77.3	7.5
2.85947	0.00138206	0.815078	A0A3B6RGH6	Importin N-terminal domain-containing protein		13	7	1028	112.7	4.72
1.6569	0.0220344	0.807664	A0A3B6TBN7	Uncharacterized protein		10	3	555	64	6.25
1.37159	0.0425017	0.805447	A0A3B5Y0N6	Uncharacterized protein		21	9	719	78.4	8.57
1.4407	0.036249	0.778316	A0A3B5YQA5	Phosphatidate cytidylyltransferase (EC 2.7.7.41)		7	2	431	49.6	9.14
1.32094	0.0477599	0.769365	A0A3B5XZB3	Protein kinase domain-containing protein		11	4	714	79.2	6.55
2.78896	0.00162571	0.762618	A0A3B6LGZ6	LIM zinc-binding domain-containing protein		15	6	516	58.3	6.33
2.25752	0.00552685	0.760924	A0A3B6QCH4	Peptidase_S9 domain-containing protein		13	6	783	85.7	5.92
1.50629	0.031168	0.749304	A0A3B6KDR3	Uncharacterized protein		34	70	3632	401.8	5.26
3.50452	0.000312951	0.739163	A0A3B5XZZ1	PCI domain-containing protein		47	11	385	43.4	5.77
1.45496	0.0350787	0.737987	A0A3B5ZRE8	Uncharacterized protein		46	29	835	92.6	5.17
1.93229	0.0116873	0.676485	A0A1D5UPJ9	UBX domain-containing protein	CAMPLR22A2D_LOCUS5422	17	5	456	50.3	4.94			protein binding
1.30821	0.0491801	0.669073	A0A3B6SEG0	Uncharacterized protein		3	3	1355	154.9	5.87
1.3392	0.0457928	0.66632	A0A3B6NUY0	Protein kinase domain-containing protein		15	11	1112	122.5	5.69
1.6356	0.0231419	0.663846	A0A3B6LSQ4	Ornithine aminotransferase (EC 2.6.1.13)	OAT-5B	20	6	468	51	7.08
3.0666	0.000857836	0.659157	A0A3B6TSR5	C2 domain-containing protein		18	4	272	29.9	8.66
1.84794	0.0141926	0.65689	A0A3B6TUC1	Uncharacterized protein		6	3	719	85.7	7.46
1.99193	0.0101875	0.650126	A0A1D6BNE7	Proteasome subunit beta (EC 3.4.25.1)		37	4	204	22.8	5.27	metabolic process	cytoplasm;nucleus;proteasome	catalytic activity
1.32924	0.0468558	0.646504	A0A3B6RSZ0	AAA domain-containing protein		10	4	686	72.6	5.54
2.32813	0.00469753	0.634648	A0A077RF27	Uncharacterized protein	TRAES_3BF040600070CFD_c1	9	8	1319	147.5	9.01	transport		catalytic activity;nucleotide binding;transporter activity
1.6016	0.0250263	0.63188	A0A3B6EEB5	Uncharacterized protein		12	5	658	72.6	8.16
1.39879	0.0399215	0.627302	A0A3B6TDG9	CBFD_NFYB_HMF domain-containing protein		16	3	199	21.5	5.81
1.50765	0.0310703	0.603733	A0A3B6TKL3	Uncharacterized protein		42	11	402	44.7	6.23
2.42076	0.00379523	0.597125	A0A3B6GQV3	DNA helicase (EC 3.6.4.12)		23	18	849	93.8	6.86
2.04735	0.00896711	0.592487	A0A3B6BZN8	UBA_e1_C domain-containing protein		31	19	1064	117.7	5.57
2.81233	0.00154053	0.592185	A0A3B6ED92	DNA polymerase epsilon subunit (EC 2.7.7.7) (DNA polymerase II subunit 2)		7	2	533	59.9	5.29
2.5185	0.0030304	0.591092	A0A3B6GNX8	Uncharacterized protein		36	22	793	89.8	6.92
1.53253	0.029341	-0.597407	A0A3B6QDX0	Serine/threonine-protein phosphatase 2A 55 kDa regulatory subunit B		21	7	512	57.1	6.16
2.16247	0.00687904	-0.598784	A0A3B6RIT4	Tr-type G domain-containing protein		25	17	994	110.2	5.4
1.34483	0.0452037	-0.607393	A0A3B6C8J8	Uncharacterized protein		4	2	557	61.2	5.8
2.47409	0.00335665	-0.642776	A0A3B6NJD4	L-lactate dehydrogenase (EC 1.1.1.27)		62	11	358	38	7.06
2.28007	0.00524723	-0.68599	A0A3B6JNS3	Uncharacterized protein		12	10	1089	115	5.8
1.6442	0.0226882	-0.71335	A0A3B5Y6C7	Uncharacterized protein		53	18	509	54.5	5.52
1.53453	0.0292061	-0.719376	A0A3B6LSA9	Protein kinase domain-containing protein		14	7	770	85.4	7.93
1.67303	0.0212311	-0.738324	A0A3B6CAU8	AAA domain-containing protein		26	6	333	36.5	7.75
3.17851	0.000662969	-0.73843	A0A3B5YUS7	Pyridoxal phosphate homeostasis protein (PLP homeostasis protein)		12	2	243	26.1	6.35
2.1929	0.00641363	-0.740925	A0A3B6KE69	AMP-binding domain-containing protein		22	9	691	75.8	7.24
1.36696	0.0429581	-0.741274	A0A3B6SFQ5	Uncharacterized protein		4	2	625	68.8	5.77
1.3154	0.0483728	-0.758146	A0A3B6DKR8	Glutamyl-tRNA(Gln) amidotransferase subunit A, chloroplastic/mitochondrial (Glu-AdT subunit A) (EC 6.3.5.7)	GATA	5	2	541	57	6.06
1.34254	0.0454427	-0.762698	A0A3B6EAJ2	Uncharacterized protein		33	4	186	19.8	4.59
1.32097	0.0477558	-0.762975	A0A3B6IS72	Arf-GAP domain-containing protein		24	7	464	49.9	6.81
1.55861	0.0276304	-0.769775	A0A341UHD1	Uncharacterized protein		49	2	78	8.5	9.54
2.77268	0.00168779	-0.781374	A0A1D6SEC2	Uncharacterized protein		31	4	221	24.7	9.42	transport	membrane
1.78022	0.0165874	-0.789367	A0A3B6GRF4	Uncharacterized protein		61	9	331	35.6	5.83
1.3567	0.043985	-0.792756	A0A3B6T8T6	Uncharacterized protein		25	6	407	44.4	5.91
1.71994	0.0190574	-0.804839	A0A3B6QDR7	Uncharacterized protein		6	2	507	55.9	8.5
1.99914	0.0100199	-0.831635	A0A3B6DJE5	PPM-type phosphatase domain-containing protein		38	8	342	37.2	7.53
1.3687	0.0427854	-0.83606	A0A3B5XUN5	Uncharacterized protein		20	4	294	32.8	8.91
1.4511	0.0353913	-0.869573	A0A3B6PM66	Uncharacterized protein		54	16	384	43	6.84
1.5044	0.0313037	-0.877891	A0A3B6C7Z9	Uncharacterized protein		21	7	568	59.7	8.43
1.69879	0.0200081	-0.896551	A0A0C4BK54	Uncharacterized protein		47	8	150	16.3	10.56	metabolic process	ribosome	structural molecule activity
2.02456	0.00945008	-0.922528	A0A3B5ZX55	PH domain-containing protein		38	3	167	18.5	6.58
2.09742	0.00799052	-0.970784	A0A3B6MPA3	Uncharacterized protein		3	2	617	70.3	7.46
2.55052	0.002815	-0.979166	W5D6S5	S-formylglutathione hydrolase (EC 3.1.2.12)	TRAES_3BF047500040CFD_c1	47	8	290	31.6	6.61	metabolic process	cytoplasm	catalytic activity
1.68629	0.0205927	-0.984019	A0A3B6GYZ1	Glycosyltransferase (EC 2.4.1.-)		26	7	472	51.1	6.23
1.4438	0.0359915	-1.01274	A0A3B5XTZ9	DUF383 domain-containing protein		14	3	345	37.3	4.83
1.89226	0.0128157	-1.02104	A0A3B6U6J2	t-SNARE coiled-coil homology domain-containing protein		13	2	232	25.7	8.41
1.79261	0.0161208	-1.03923	A0A3B6PPJ9	Uncharacterized protein		45	11	359	39.5	6.25
1.5126	0.0307188	-1.06864	A0A3B6PKG8	Histone deacetylase (EC 3.5.1.98)	HDA6-B	27	6	458	51	5.66
1.65913	0.0219213	-1.08451	A0A3B5XSU1	Uncharacterized protein		25	2	127	14	8.15
1.35417	0.0442419	-1.09762	A0A3B5YY12	Protein kinase domain-containing protein		11	7	892	96.1	6.57
1.74309	0.0180682	-1.09927	A0A3B6H334	Uncharacterized protein		13	4	545	59.2	9.11
1.44213	0.0361304	-1.10383	A0A3B6HW85	Uncharacterized protein		52	18	648	72.4	6.13
1.40117	0.0397038	-1.10879	A0A3B6R927	PALP domain-containing protein		9	2	347	36.8	5.26
1.40704	0.039171	-1.11474	A0A3B6EDR0	VHS domain-containing protein		19	9	689	74.8	5.4
1.59802	0.0252334	-1.11954	A0A1D5V081	Carboxypeptidase (EC 3.4.16.-)	CAMPLR22A2D_LOCUS1192	8	2	521	56.5	5.91	metabolic process		catalytic activity
1.76175	0.0173081	-1.12227	C7AE91	Blue copper protein	BCP	24	4	176	17.4	5.31	metabolic process	membrane
2.39785	0.00400079	-1.15811	A0A3B6QFG7	BRO1 domain-containing protein		8	2	347	37.9	6.87
1.80172	0.0157863	-1.16439	A0A1D5UKZ7	RanBD1 domain-containing protein	CAMPLR22A2D_LOCUS5531	14	3	390	41.6	6.74	transport
1.32706	0.0470917	-1.18493	A0A3B5ZSV7	DNA helicase (EC 3.6.4.12)		27	17	779	86.9	6.4
1.35374	0.0442852	-1.20091	A0A3B6TJI5	Kinesin motor domain-containing protein		4	3	1006	112.5	5.97
1.76366	0.0172322	-1.24589	A0A1D5V0A4	Uncharacterized protein	CAMPLR22A2D_LOCUS829	8	3	509	57.4	6.14	metabolic process		catalytic activity
1.86894	0.0135227	-1.25745	A0A3B6HRH3	Peptidase S59 domain-containing protein		9	6	1008	113.3	5.24
1.52824	0.0296318	-1.26079	A0A3B6HT09	Uncharacterized protein		26	10	482	52.7	7.5
1.7475	0.0178855	-1.27892	A0A3B6B6M7	Adenosylhomocysteinase (EC 3.3.1.1)		74	26	481	52.8	5.9
1.32637	0.0471664	-1.30814	A0A3B6AX03	C3HC-type domain-containing protein		10	5	837	88.8	5.02
1.79756	0.0159383	-1.32991	A0A7H4LKF4			25	7	335	36.6	8.37
1.54434	0.0285533	-1.33141	A0A3B6TKA4	Uncharacterized protein		7	2	603	65	9.28
3.01675	0.000962157	-1.33403	A0A3B5YUQ1	Glycosyltransferase (EC 2.4.1.-)		15	4	485	52.3	5.87
1.53629	0.0290877	-1.34041	A0A3B6FJN7	Uncharacterized protein		6	2	233	25.4	5.4
1.38405	0.0413003	-1.40336	A0A3B6MX10	Endoglucanase (EC 3.2.1.4)		9	3	531	57.3	6.32
1.76014	0.0173722	-1.42011	A0A3B6IR14	Uncharacterized protein		12	6	567	62	5.88
2.00463	0.0098939	-1.42387	A0A3B6HXQ7	Uncharacterized protein		2	2	853	94.1	5.31
1.62026	0.0239742	-1.44055	W5D5R6	Cold induced protein	TRAES_3BF087500010CFD_c1	37	5	158	16.2	4.98
1.3089	0.0491017	-1.49373	A0A3B6PK44	Ribosomal_L12 domain-containing protein		33	5	192	20.5	9.32
1.81176	0.0154257	-1.4997	A0A3B6LWF2	Uncharacterized protein		29	5	214	23.4	7.11
1.38088	0.0416021	-1.56741	A0A3B6TKL9	ATP-dependent 6-phosphofructokinase (ATP-PFK) (Phosphofructokinase) (EC 2.7.1.11) (Phosphohexokinase)	PFK	22	7	554	59.9	6.76
1.39796	0.0399982	-1.5767	A0A3B6GTB4	Uncharacterized protein		18	4	319	35	8.78
1.58111	0.0262353	-1.5845	A0A3B6QNJ6	Methyltransf_2 domain-containing protein		47	9	370	39.5	5.25
1.53038	0.0294865	-1.59628	A0A3B6IX84	Protein kinase domain-containing protein		4	2	705	77.7	6.58
1.34517	0.0451679	-1.59792	A0A3B6NTT8	Annexin		57	16	315	35.4	6.57
1.44352	0.0360149	-1.62717	A0A3B6QNU0	Uncharacterized protein		28	3	180	19.2	5.59
1.47592	0.0334258	-1.7188	A0A3B6B0S4	Amine oxidase (EC 1.4.3.-)		29	14	719	81	7.25
2.25132	0.00560633	-1.76366	A0A3B6TMP2	Uncharacterized protein		15	9	1279	137.3	4.67
1.42638	0.0374644	-1.918	A0A3B6CA09	Uncharacterized protein		32	11	597	68.6	6.96
1.96821	0.0107594	-2.01864	A0A3B6I2J1	Uncharacterized protein		7	3	646	70.4	6.54
4.64175	2.28163e-05	-2.02496	A0A3B6EBZ6	14_3_3 domain-containing protein		71	20	262	29.7	4.74
2.59507	0.00254054	-2.02999	A0A1D5WMG7	Uncharacterized protein		10	2	247	26.5	9.42		mitochondrion;organelle lumen
2.41172	0.00387507	-2.03366	A0A3B6CAQ5	HMA domain-containing protein		9	3	308	32.1	5.83
1.8649	0.0136488	-2.29831	A0A3B5Y0E2	ALOG domain-containing protein		44	6	284	29.9	7.42
3.1824	0.000657049	-2.48129	A0A3B5Y5E3	Uncharacterized protein		8	4	721	72.9	8.48
1.66629	0.0215631	-2.52744	A0A3B6FJI0	Alba domain-containing protein		23	2	153	16.2	4.92
1.47678	0.0333595	-2.76092	A0A3B6LID2	GLTSCR1 domain-containing protein		12	2	348	38.9	4.94
2.18812	0.00648458	-2.83023	A0A3B6JP22	Uncharacterized protein		7	2	363	40.1	9.14
1.95227	0.0111617	-3.04235	A0A3B6HVP6	Uncharacterized protein		10	2	386	42.6	7.28
1.47236	0.0337011	-3.17578	A0A3B6QKW3	Uncharacterized protein		16	4	462	48.1	5.74
2.11894	0.00760425	-3.20759	D8L9J1	Retinal dehydrogenase, putative, expressed	TAA_ctg0091b.00180.1 TRAES_3BF066400020CFD_c1	36	11	500	54	5.92	metabolic process		catalytic activity
1.57091	0.0268592	-3.63079	A0A3B6D5D3	Stress-response A/B barrel domain-containing protein		38	3	113	12.2	5.67
4.09376	8.05827e-05	-4.36112	C3VQ52	Ascorbate peroxidase (Fragment)	POD1	75	14	243	26.6	5.82	metabolic process;response to stimulus		antioxidant activity;catalytic activity
4.11042	7.75491e-05	-4.37381	A0A3B6AV38	Protein kinase domain-containing protein		10	3	353	40	5.81
1.37614	0.0420589	-4.52946	A0A3B6DA12	Ribosomal protein L19		26	4	213	24.6	11.44
2.03624	0.00919935	-4.61252	A0A1D6CZK2	Uncharacterized protein		26	2	87	9.7	9.55		membrane
2.2793	0.00525655	-4.68703	A0A3B6NJV1	Glycosyltransferase (EC 2.4.1.-)		6	2	506	55.2	5.85
2.01566	0.00964593	-4.72513	A0A3B6LMB6	Uncharacterized protein		6	2	396	43.6	6.8
2.66509	0.00216228	-4.9899	A0A077S3Y0	Fe2OG dioxygenase domain-containing protein	TRAES_3BF041300020CFD_c1	10	2	371	41.1	5.43	metabolic process		catalytic activity;metal ion binding
1.86451	0.0136613	-5.20651	A0A3B6HQY5	CBM20 domain-containing protein		22	7	653	73.1	6.4

## Sheet: Table S3
Table S3: List of significantly changed proteins in wheat roots between irradiation and unirradiation with millimeter waves under flooding.
#NAME?	p-value	Difference	Accession	Protein names	Gene names	Coverage in Percent	Number of Peptides	Number of AAs	MW in kDa	calc pI	Biological Process	Cellular Component	Molecular Function
4.28919	5.13819e-05	6.1429	D6PW70	BZiP-like trancription factor	SF	7	2	471	50.7	7.12	regulation of biological process		DNA binding
3.10624	0.000782996	6.00323	A0A3B5YRZ6	Cellulase domain-containing protein		13	10	1074	117.6	6.13
2.15085	0.00706564	5.9954	A0A3B6NPC1	Uncharacterized protein		18	2	87	10.2	8.73
2.13357	0.00735244	5.7983	A0A3B6GY97	Uncharacterized protein		6	2	364	39.2	5.88
1.77134	0.0169301	5.29989	P93692	Serpin-Z2B (TriaeZ2b) (WSZ2b) (WZS3)		40	9	398	43	5.33	regulation of biological process		enzyme regulator activity
2.90742	0.00123761	5.11266	A0A3B6CGM0	PLAT domain-containing protein		18	2	150	16.6	8.9
1.85309	0.0140253	5.08005	A0A3B5YUW7	SHSP domain-containing protein		14	2	218	23.2	8.98
2.19186	0.00642899	5.0475	A0A3B6NQJ8	Uncharacterized protein		12	2	346	38.9	5.47
3.87264	0.000134078	4.72471	A0A3B6DFD8	Aldo_ket_red domain-containing protein		10	3	344	37.7	6.24
1.93847	0.0115219	4.55534	A0A3B6JRG8	FAD-binding PCMH-type domain-containing protein		4	2	579	62.4	7.71
1.56102	0.0274774	4.38962	A0A3B5ZZR5	SHSP domain-containing protein		20	3	186	20.6	5.12
2.51898	0.00302703	4.37161	A0A3B6JM69	Uncharacterized protein		12	2	201	21.7	4.21
1.65153	0.0223083	4.27852	A0A3B6NQV9	Uncharacterized protein		6	2	359	41	7.14
1.85673	0.0139082	4.27484	Q9SQG8	Pathogenesis-related protein 4 (Fragment)	PR4	28	2	120	13.1	7.24	defense response;response to stimulus
1.68904	0.0204626	4.19252	A0A3B6TF37	TPT domain-containing protein		8	3	392	43.1	9.44
2.25907	0.00550713	4.18473	A0A3B6HSU5	Uncharacterized protein		10	3	338	35.2	7.11
1.52526	0.0298361	4.17148	A0A3B6MY06	Uncharacterized protein		36	5	152	17.7	10.74
1.75917	0.0174112	4.14359	A0A3B5XZD7	Uncharacterized protein		3	2	1062	115	8.6
1.35006	0.0446618	3.893	A0A3B6PJZ0	Cytochrome b-c1 complex subunit Rieske, mitochondrial (EC 7.1.1.8)		21	5	270	29.5	7.78
3.4085	0.000390394	3.79381	A0A3B6LVF9	Uncharacterized protein		9	6	1023	114.4	5.19
2.23414	0.00583261	3.74148	A0FHB1	Multiple inositol polyphosphate phosphatase PhyIIa2		22	8	517	57.9	6.9	metabolic process	endoplasmic reticulum;membrane	catalytic activity
3.18871	0.00064757	3.72777	A0A3B6DK81	Peptidase_M28 domain-containing protein		3	2	876	95.9	7.3
1.35089	0.0445766	3.69489	W5B7W5	Caleosin	Clo2	12	2	244	27.7	6.62
3.68451	0.000206772	3.58759	A0A3B6QEM9	Uncharacterized protein		10	2	221	22.9	5.38
1.99532	0.0101083	3.58171	A0A3B6PJB9	Uncharacterized protein		8	2	648	69.7	7.3
2.71483	0.00192829	3.55357	A0A3B6KEY4	Uncharacterized protein		20	4	306	32.6	4.16
1.71766	0.0191577	3.53776	A0A2X0S3L7	C2 domain-containing protein	CAMPLR22A2D_LOCUS1790	25	6	438	45.7	4.48
2.85318	0.00140223	3.52861	A0A341UHD1	Uncharacterized protein		49	2	78	8.5	9.54
2.04219	0.00907431	3.40907	A0A3B6D806	Lactamase_B domain-containing protein		9	2	330	37	7.28
1.31978	0.0478869	3.38226	A0A2P1DP54	Serine/threonine-protein phosphatase (EC 3.1.3.16)		9	6	987	104.4	6
1.7978	0.0159293	3.38027	A0A341VXI7	Uncharacterized protein		50	8	292	30.9	8.15
3.24854	0.000564239	3.36656	A0A3B6KCV7	Uncharacterized protein		14	5	515	56.8	5.31
3.26746	0.00054018	3.28475	A0A3B6FZU6	Peptidase A1 domain-containing protein		9	2	425	44.4	6.14
1.46146	0.0345575	3.2742	A0A3B6AZR4	Kinesin motor domain-containing protein		3	2	1133	125.2	6
1.9834	0.0103897	3.2105	A0A3B6ELQ3	Uncharacterized protein		14	3	271	30.6	6.1
1.9074	0.0123767	3.19262	A0A3B6CD54	4HBT domain-containing protein		19	2	170	17.9	6.14
1.7666	0.0171158	3.18685	A0A3B5XZR6	Uncharacterized protein		26	4	252	26.6	6.54
1.3413	0.0455723	3.17126	A0A7G2IG80			12	3	369	41.5	6.19
2.0438	0.00904059	3.14178	A0A3B6LGK5	WD_REPEATS_REGION domain-containing protein		3	2	809	87.8	6.6
1.50629	0.0311681	3.08042	A0A3B6KL70	Uncharacterized protein		25	3	175	20	4.64
1.55875	0.0276214	2.99918	A0A3B6TM70	RRM domain-containing protein		7	2	301	32.3	9.16
2.08096	0.00829932	2.98529	A0A3B6EDC7	Protein kinase domain-containing protein		13	7	952	103.6	6.51
1.98089	0.01045	2.91584	A0A3B6B5A7	Alpha-mannosidase (EC 3.2.1.-)		6	5	1019	114.4	6.4
2.65767	0.00219951	2.8968	F8S6U5	Pathogenesis-related protein 1-15	Pr-1-15	12	2	167	18.4	9.79		extracellular
1.82775	0.014868	2.85445	A0A077S2Z7	HABP4_PAI-RBP1 domain-containing protein	TRAES_3BF016200170CFD_c1	31	6	381	40.4	6.3			protein binding
1.52898	0.0295813	2.82523	A0A3B6CFF2	Uncharacterized protein		6	2	721	75.1	5.07
1.71544	0.0192557	2.80876	A0A3B6JQ21	Post-GPI attachment to proteins factor 3		11	3	352	39.9	7.24
2.01932	0.0095648	2.80637	A0A3B6TW45	Uncharacterized protein		12	2	167	17.8	7.84
1.74751	0.017885	2.80635	A0A3B5YSR4	7,8-dihydroneopterin aldolase (EC 4.1.2.25)		30	2	135	14.6	5.83
1.32151	0.0476967	2.79652	A0A1D5ZUZ5	Uncharacterized protein		10	2	227	25.7	7.55	cell organization and biogenesis;regulation of biological process	nucleus	DNA binding;metal ion binding;protein binding
1.49542	0.0319583	2.77223	A0A3B6EKK7	Uncharacterized protein		15	2	188	20.8	5.76
1.97484	0.0105964	2.71335	A0A3B6GQE7	Uncharacterized protein		5	2	758	83.6	6.79
1.93528	0.011607	2.71277	A0A3B6RKK0	FAD-binding PCMH-type domain-containing protein		21	8	591	63.6	7.34
1.65261	0.0222533	2.6925	A0A3B6RNI4	Ribosomal_L2_C domain-containing protein		16	3	319	34.6	10.43
2.47341	0.00336192	2.67761	A0A3B5Y432	Uncharacterized protein		10	5	702	78.4	8.21
1.78429	0.0164327	2.62613	A0A3B6EKC9	Uncharacterized protein		17	4	353	35.7	8.79
1.88072	0.0131608	2.62544	Q8GTB7	Glutathione transferase F1 (EC 2.5.1.18)	gstf1	73	7	212	23.4	6.42			catalytic activity;protein binding
1.99076	0.010215	2.62457	A0A3B6H093	KH domain-containing protein		11	2	294	33.1	8.68
2.33468	0.00462726	2.61028	A0A3B6IRQ2	UBA_e1_C domain-containing protein		19	13	1060	117.3	5.34
2.87251	0.00134119	2.59162	W5CPC6	NAB domain-containing protein	TRAES_3BF009700040CFD_c1	13	5	615	70.1	5.05			protein binding
2.03058	0.00932013	2.56413	A0A3B6GN02	Uncharacterized protein		14	5	491	52.1	5.33
2.48303	0.00328831	2.5443	A0A3B6H405	Uncharacterized protein		18	4	362	39.5	8.05
2.82386	0.00150016	2.52586	A0A3B6PK93	PPM-type phosphatase domain-containing protein		48	11	298	31.8	4.98
1.93416	0.0116369	2.50766	A0A3B6LP65	Epimerase domain-containing protein		10	2	344	37.9	6.01
1.65705	0.0220268	2.50529	A0A3B5Z0U9	Uncharacterized protein		38	2	111	11	4.07
1.95154	0.0111805	2.48923	A0A3B6MRU0	RING-type domain-containing protein		14	3	323	36.2	5.15
2.07743	0.00836694	2.48593	A0A3B6B498	PHD-type domain-containing protein		2	2	1301	143	6.74
1.69623	0.0201265	2.47569	A0A3B6KCY7	Uncharacterized protein		21	4	292	30.5	7.03
1.98427	0.0103687	2.4528	W5CPX4	PKS_ER domain-containing protein	TRAES_3BF082000040CFD_c1	16	4	354	38.5	6.4	metabolic process		catalytic activity;metal ion binding;nucleotide binding
2.91492	0.00121641	2.42001	W5D031	Uncharacterized protein	TRAES_3BF021500020CFD_c1	25	14	803	90.1	5.43	metabolic process		catalytic activity
1.70161	0.0198788	2.40837	A0A3B6D745	Peroxidase (EC 1.11.1.7)		20	4	313	31.9	7.24
2.9684	0.00107548	2.40566	A0A3B6AVV7	Uncharacterized protein		20	14	987	113.1	5.88
2.71361	0.00193372	2.40002	A0A3B6E9S7	Uncharacterized protein		6	2	514	55.7	5.62
2.63858	0.00229839	2.39142	A0A3B6PRG3	Uncharacterized protein		3	2	797	89.7	6.4
1.73414	0.0184444	2.36565	A0A3B5XZ55	Kinesin motor domain-containing protein		5	3	1015	112.2	5.73
1.45504	0.0350718	2.3629	A0A3B6EIT7	NAB domain-containing protein		2	2	1322	150.5	4.86
1.59993	0.025123	2.3433	A0A3B6JM03	tRNA (guanine(26)-N(2))-dimethyltransferase (EC 2.1.1.216)		18	7	603	66.4	7.5
1.32703	0.0470942	2.33368	A0A3B6PJI0	Uncharacterized protein		18	3	317	35.1	6.09
1.68369	0.0207163	2.32629	A0A3B5YUN8	Malic enzyme		66	23	570	63	5.82
1.43522	0.0367093	2.27537	A0A3B6FHQ8	Uncharacterized protein		5	2	494	53.2	6.25
1.32887	0.0468954	2.26678	A0A341ZG32	Inhibitor_I29 domain-containing protein		15	3	177	19.7	8.57
1.4878	0.0325235	2.24692	A0A3B6TLW2	SERPIN domain-containing protein		21	7	397	43.4	5.25
1.55432	0.0279048	2.24414	A0A3B5Y117	PlsC domain-containing protein		10	3	382	42.2	8.7
1.36115	0.0435358	2.22373	A0A3B6I7R0	RING-type domain-containing protein		12	3	335	34.8	4.67
1.66015	0.0218701	2.21686	A0A3B6GUA6	NAB domain-containing protein		4	4	1318	150.2	4.89
2.13202	0.00737877	2.19725	A0A3B6U1U8	Peroxidase (EC 1.11.1.7)		11	3	314	32.9	6.39
1.31661	0.0482384	2.18311	Q03033	Elongation factor 1-alpha (EF-1-alpha)	TEF1	67	22	447	49.1	9.13	metabolic process	cytoplasm	catalytic activity;nucleotide binding;RNA binding
1.48039	0.0330837	2.17021	A0A3B6TQE2	Uncharacterized protein		6	2	535	57.6	6.42
1.87824	0.0132362	2.16811	A0A077RVD7	Uncharacterized protein	TRAES_3BF062500090CFD_c1	52	5	145	15.4	8.73
1.42475	0.0376057	2.1619	A0A3B6U582	Sucrose synthase (EC 2.4.1.13)		8	4	868	98.6	6.86
2.49533	0.00319644	2.13867	A0A3B6EBZ6	14_3_3 domain-containing protein		71	20	262	29.7	4.74
1.72242	0.0189487	2.13618	A0A3B6NM69	PWWP domain-containing protein		7	2	376	40.4	9.07
2.38067	0.00416229	2.12923	A0A3B6FPU5	DEAD-box ATP-dependent RNA helicase, putative		10	6	780	86.7	10.13
2.63271	0.00232966	2.12629	A0A7H4LNH5			3	2	674	77	7.06
1.32758	0.0470347	2.11797	A0A3B6LR86	FAD-binding PCMH-type domain-containing protein		5	2	587	64	7.65
1.66512	0.0216212	2.10887	A0A3B6DAV7	HRDC domain-containing protein		4	3	971	108.9	8.07
2.81018	0.00154817	2.08223	A0A3B6MZQ4	Glycosyltransferase (EC 2.4.1.-)		16	6	490	53.3	5.62
2.15392	0.00701581	2.03705	A0A3B5Y8J7	HABP4_PAI-RBP1 domain-containing protein		16	3	372	39.6	5.6
1.35003	0.0446652	2.03322	A0A3B5XZ27	Tyrosine--tRNA ligase (EC 6.1.1.1) (Tyrosyl-tRNA synthetase)		7	2	512	55.7	6.81
1.74369	0.0180431	2.02433	A0A3B6JLX6	FAD_binding_3 domain-containing protein		27	8	445	48	7.03
1.76728	0.017089	1.99751	C8CK10	Phosphomannomutase (EC 5.4.2.8)	PMM-D2	48	10	251	28.5	6.35	metabolic process	cytoplasm	catalytic activity
2.96859	0.00107501	1.9931	A0A3B6TPK6	Glutathione synthetase (GSH-S) (EC 6.3.2.3)		9	3	538	59.2	5.87
1.52411	0.0299153	1.99138	A0A3B6KEV9	SufE domain-containing protein		3	2	718	77.9	6.44
3.31335	0.00048602	1.9732	A0A077RUY1	Uncharacterized protein	TRAES_3BF030100060CFD_c1	40	5	187	20.1	4.6			metal ion binding
2.06419	0.00862606	1.97201	A0A3B6LM88	Uncharacterized protein		4	2	527	58.6	5.71
3.70524	0.000197132	1.96066	A0A3B5ZY13	Patatin (EC 3.1.1.-)		27	7	405	44.4	6.7
1.58943	0.0257374	1.95881	A0A3B5YTD3	Patatin (EC 3.1.1.-)		42	10	408	44.5	6.86
2.30905	0.00490854	1.95185	Q53WS1	Alpha 1 purothionin (Alpha purothionin) (R59-thionin)	Pur-D1 Pur	62	6	136	14.5	5.25	defense response;response to stimulus	extracellular
2.06237	0.00866215	1.94762	W5H631	60S ribosomal protein L27		45	6	137	15.5	10.48	metabolic process	ribosome	structural molecule activity
2.33733	0.0045991	1.93633	A0A3B6LVK5	Uncharacterized protein		4	2	612	67.3	6.55
4.09885	7.96441e-05	1.92335	A0A3B6ENV1	Uncharacterized protein		3	2	1152	125.4	4.28
1.32615	0.0471899	1.9196	A0A3B6EGL9	Uncharacterized protein		31	9	493	53.1	7.11
1.80229	0.0157656	1.90655	A0A3B6LD45	Uncharacterized protein		7	2	510	54.2	8.5
1.39701	0.0400857	1.89281	A0A3B6KSH4	Beta-amylase (EC 3.2.1.2)		47	16	525	58.8	5.68
1.88308	0.0130893	1.89011	A0A3B5Y771	Fe2OG dioxygenase domain-containing protein		11	3	323	35.2	5.86
1.39556	0.0402198	1.86858	A0A3B6CAC6	Uncharacterized protein		5	2	724	81.3	5.16
2.8719	0.00134308	1.85961	A0A3B6QGI3	Histone deacetylase (EC 3.5.1.98)		9	3	518	57.9	5.39
1.56846	0.0270108	1.8551	A0A3B6SMQ1	Gp_dh_N domain-containing protein		45	12	343	37.2	8.16
2.57002	0.00269144	1.85465	A0A3B5ZXX0	Structural maintenance of chromosomes protein		3	3	1166	132.8	7.2
2.34929	0.00447414	1.8537	A0A3B6A1H2	Fe2OG dioxygenase domain-containing protein		7	2	321	34.9	5.53
2.05898	0.00873016	1.844	A0A3B6LQE3	Uncharacterized protein		8	6	1084	121	5.12
1.90691	0.0123906	1.83714	A0A3B6AWC1	Uncharacterized protein		5	2	543	60.9	7.05
3.00595	0.000986385	1.83026	A0A3B6PGD2	Uncharacterized protein		43	18	530	59.4	4.79
1.78027	0.0165854	1.82953	A0A1D5XGW0	Deoxymugineic acid synthase 1-B (EC 1.1.1.285)	DMAS1-B	33	7	314	35.2	7.42	cell communication;metabolic process;response to stimulus		catalytic activity
1.64811	0.0224848	1.8184	A0A3B6TNH8	Tr-type G domain-containing protein		25	17	994	110.2	5.36
1.9399	0.0114843	1.8183	A0A3B6EMM6	Uncharacterized protein		15	11	983	110.1	6.3
1.57676	0.0264999	1.79738	A0A3B6NUT7	Germin-like protein		12	2	216	22.8	8.31
1.86478	0.0136527	1.79111	A0A1D6AM47	Aquaporin (Plasma membrane intrinsic protein 1D)	PIP1 PIP1D	52	9	292	30.9	8.15	transport	membrane	transporter activity
2.44489	0.00359011	1.77506	A0A3B6HRU8	Uncharacterized protein		10	10	1568	179.1	5.66
1.47339	0.0336212	1.76936	A0A3B6TKP6	Uncharacterized protein		19	5	468	49.7	6.71
1.32222	0.0476188	1.76841	A0A3B5Y6Z1	Patatin (EC 3.1.1.-)		44	9	392	41.7	6.2
1.65035	0.0223694	1.76541	A0A3B5YVD2	Uncharacterized protein		18	4	291	32	7.84
1.31163	0.0487947	1.76199	C1K737	Multiprotein bridging factor 1	MBF1 CAMPLR22A2D_LOCUS3875	26	3	142	15.7	9.88			DNA binding
2.25194	0.00559833	1.75817	A0A3B6A2E9	Protein kinase domain-containing protein		11	4	474	53.5	9.63
3.05756	0.000875871	1.75734	A0A3B6QIY9	Uncharacterized protein		28	11	691	70.8	7.61
2.40121	0.00397001	1.73678	A0A3B6JP22	Uncharacterized protein		7	2	363	40.1	9.14
1.59578	0.025364	1.7338	A0A3B6QFD4	Uncharacterized protein		10	3	401	45.1	8.24
1.75785	0.0174642	1.72387	A0A3B6TDH8	Uncharacterized protein		38	5	160	17.6	5.87
1.61473	0.0242814	1.72244	A0A3B6PK72	Uncharacterized protein		15	7	538	60	9.06
1.9368	0.0115664	1.71587	A0A3B6TF02	YTH domain-containing protein		7	3	612	69	5.83
1.32931	0.0468482	1.70736	A0A3B6BY21	Uncharacterized protein		25	4	317	34.7	6.67
1.46794	0.0340458	1.70453	A0A3B6EBP5	S5A_REDUCTASE domain-containing protein		10	3	310	35.6	9.51
1.87636	0.0132934	1.70275	A0A3B6QA96	Uncharacterized protein		12	4	513	56.1	7.02
1.83351	0.0146722	1.68813	A0A3B6SIP6	Uncharacterized protein		73	11	153	17.1	8.85
1.6604	0.0218576	1.67689	A0A3B6D584	Sulfotransferase (EC 2.8.2.-)		15	4	356	39.2	6.33
1.72845	0.0186874	1.65923	A0A3B6AQ43	Uncharacterized protein		20	4	400	44.1	4.7
1.42548	0.0375423	1.65561	A0A3B6RMW1	RING-type domain-containing protein		9	3	457	50.5	6.2
1.34954	0.044716	1.65378	A0A077RX33	Abhydrolase_3 domain-containing protein	TRAES_3BF028200050CFD_c1	23	4	315	33.1	5.48	metabolic process		catalytic activity
1.61361	0.0243438	1.64096	A0A3B6JM67	Glutathione reductase (GRase) (EC 1.8.1.7)		11	4	552	59.5	8
2.17746	0.00664563	1.6263	A0A3B6RH67	Uncharacterized protein		15	2	226	24.8	9.52
1.79535	0.0160194	1.61953	A0A3B6IPZ0	SERPIN domain-containing protein		32	9	399	42.6	6.62
1.66494	0.02163	1.6154	A0A1D5UPC5	tRNA (adenine(58)-N(1))-methyltransferase (EC 2.1.1.220)	CAMPLR22A2D_LOCUS2702	10	2	335	35.9	7.47	metabolic process		catalytic activity
3.59621	0.000253391	1.61041	Q5BHR6	Cell Division Protein AAA ATPase family		12	4	522	59.4	6.83	cell division		nucleotide binding
5.00972	9.77876e-06	1.60876	A0A3B5YUH9	Protein kinase domain-containing protein		8	3	617	65.2	8.66
2.39505	0.00402669	1.58989	A0A3B6PK44	Ribosomal_L12 domain-containing protein		33	5	192	20.5	9.32
1.77687	0.0167161	1.58386	A0A3B6LVI2	Uncharacterized protein		7	2	458	49.7	7.05
2.22644	0.00593693	1.56808	A0A3B6IR10	Ricin B-type lectin domain-containing protein		68	19	347	38.6	6.77
2.07249	0.00846274	1.56629	Q41577	Peroxidase (EC 1.11.1.7)	pox1	38	7	316	33.2	6.52	metabolic process;response to stimulus	extracellular	antioxidant activity;catalytic activity;metal ion binding
1.47152	0.0337662	1.56473	A0A3B6PQ88	Fn3_like domain-containing protein		13	8	774	83.3	6.92
1.35379	0.0442799	1.56166	A0A3B6FYX2	Uncharacterized protein		13	3	282	31.4	5.9
1.75345	0.0176422	1.54956	A0A3B6MV72	Epimerase domain-containing protein		60	17	371	42	5.95
1.62298	0.0238242	1.54614	A0A3B6RC76	AAA domain-containing protein		6	3	948	105.2	5.8
1.73783	0.018288	1.54112	A0A3B6PUK0	ABC transporter domain-containing protein		27	4	291	32.6	6.44
2.08177	0.00828386	1.5362	A0A3B6H3H3	Hexosyltransferase (EC 2.4.1.-)		4	2	634	73.2	8.57
1.66351	0.0217014	1.53539	A0A3B6RNS3	Uncharacterized protein		10	3	460	49.8	6.01
2.11089	0.00774654	1.53524	A0A3B6KFL1	Stress-response A/B barrel domain-containing protein		40	4	108	11.9	5.4
1.50719	0.0311038	1.53299	A0A3B5ZYP7	Histone H2A		24	2	157	16.4	10.65
1.90257	0.0125148	1.51956	A0A3B6D4K5	Uncharacterized protein		11	3	342	36.4	8.5
1.78014	0.0165905	1.51442	A0A3B6SE23	PKS_ER domain-containing protein		11	3	336	35.2	8.78
1.55742	0.0277067	1.51333	A0A3B6SF99	MPN domain-containing protein		41	8	308	33.6	6.28
2.52506	0.00298498	1.51136	A0A3B6LW23	Uncharacterized protein		24	5	284	29.4	6.16
3.08119	0.000829483	1.50635	A0A3B6RH95	CMP/dCMP-type deaminase domain-containing protein		2	2	1596	178.3	6.86
1.456	0.0349942	1.47362	A0A3B5XUC1	PPC domain-containing protein		8	2	324	31.8	6.39
1.87912	0.0132092	1.472	A0A3B6NRN0	BSD domain-containing protein		36	6	304	34	4.64
2.34297	0.00453969	1.46431	W5ECK8	KOW domain-containing protein		37	3	159	17.7	10.07	metabolic process	ribosome	structural molecule activity
2.32272	0.00475638	1.46249	A0A3B6KQ82	Urease (EC 3.5.1.5) (Urea amidohydrolase)		6	3	862	92.3	5.87
1.3829	0.0414096	1.45186	A0A3B6TFH7	Carboxypeptidase (EC 3.4.16.-)		21	8	474	52.6	6.48
1.86489	0.0136492	1.44559	A0A3B6ERI7	Uncharacterized protein		34	7	335	35.5	8.97
1.7455	0.0179679	1.43264	A0A3B6TH09	Uncharacterized protein		6	2	607	67.8	8.73
2.11854	0.00761139	1.43263	A0A3B6LJS7	Uncharacterized protein		14	8	979	107.5	7.91
1.87562	0.0133162	1.42774	A0A3B6D3W8	Uncharacterized protein		66	3	50	5.2	9.88
1.87629	0.0132955	1.38953	A0A3B6TBX4	AAA domain-containing protein		6	3	972	107.7	5.8
1.33943	0.0457691	1.37626	A0A3B6KRA3	Uncharacterized protein		21	2	136	15.6	10.05
1.51635	0.0304547	1.36281	A0A3B6JKM2	Phytochrome		8	7	1164	127.5	6.11
1.9666	0.0107994	1.35975	A0A3B6EPI5	PKS_ER domain-containing protein		30	6	356	38.7	6.83
1.70798	0.0195893	1.35854	A0A077S3Y0	Fe2OG dioxygenase domain-containing protein	TRAES_3BF041300020CFD_c1	10	2	371	41.1	5.43	metabolic process		catalytic activity;metal ion binding
1.7122	0.0193999	1.34982	A0A3B6SG18	AAA domain-containing protein		6	3	973	107.8	5.99
1.62447	0.0237428	1.34863	A0A3B6PLZ8	Histone H2A		30	3	155	16.3	10.55
1.42329	0.037732	1.34643	A0A3B6R9Z0	Uncharacterized protein		4	4	1426	158.2	8.19
1.66945	0.0214069	1.34473	A0A3B5XWG3	Lipase_GDSL domain-containing protein		8	2	439	46.6	8.02
1.84944	0.0141435	1.32988	A0A3B5ZQ79	Uncharacterized protein		10	2	431	45.7	6.29
1.59322	0.0255139	1.32907	A0A3B6QDQ6	Arf-GAP domain-containing protein		4	2	705	76.4	8.06
1.59502	0.0254088	1.31898	A0A3B6ELL4	Uncharacterized protein		33	2	112	12	10.24
1.42346	0.0377173	1.30904	A0A3B6QLH4	SMP-LTD domain-containing protein		7	3	816	89.1	6.2
1.6074	0.0246947	1.29087	A0A3B6SKI6	Peroxidase (EC 1.11.1.7)		24	5	344	36.8	9.51
1.35605	0.0440506	1.27863	A0A7H4LEY4			20	2	205	22.3	9.16
1.61383	0.0243318	1.26907	A0A3B6B2Q7	Uncharacterized protein		23	7	528	56.7	8.05
1.51092	0.0308376	1.2678	A0A3B6IN39	Dirigent protein		18	3	182	18.8	8.6
2.16081	0.00690547	1.26498	W5D698	FCP1 homology domain-containing protein	TRAES_3BF003200110CFD_c1	23	5	360	40	7.88	transport	membrane
2.96088	0.00109427	1.26017	A0A3B5Y4T9	Ribos_L4_asso_C domain-containing protein		43	16	404	44.3	10.61
2.61745	0.00241299	1.25105	S6AWC2	Cold induced 16	WCI16	37	5	158	16.3	4.92
2.03286	0.0092713	1.24489	A0A3B6TMF0	Uncharacterized protein		19	6	444	46.1	5.08
1.70241	0.0198424	1.24169	A0A3B6D588	Peptidylprolyl isomerase (EC 5.2.1.8)		7	4	649	72	5.35
1.68689	0.0205642	1.23518	A0A3B6TIR8	Uncharacterized protein		6	2	579	65	5.69
2.00344	0.00992101	1.22908	A0A3B5ZZF9	Uncharacterized protein		15	3	362	41.4	4.93
1.68576	0.0206178	1.21998	A0A3B6JG17	Uncharacterized protein		15	4	455	51.5	5.41
1.44723	0.0357088	1.20728	A0A3B6RL96	Bms1-type G domain-containing protein		8	4	787	88.1	7.4
2.47431	0.00335495	1.20402	A0A3B6FVK6	Epimerase domain-containing protein		21	4	327	35.7	5.44
1.76869	0.0170337	1.2032	A0A3B6AZG5	SOR_SNZ domain-containing protein		9	3	386	41.6	7.18
1.68268	0.0207645	1.1877	A0A3B6HNZ1	Uncharacterized protein		26	4	296	31	6.62
2.86026	0.00137957	1.18229	A0A3B6C1T9	t-SNARE coiled-coil homology domain-containing protein		18	3	269	30.4	7.83
1.36019	0.0436323	1.18178	A0A3B6NXW9	Uncharacterized protein		62	22	535	59	6.49
1.39177	0.0405728	1.1784	A0A3B6H2V7	Signal recognition particle subunit SRP72		14	7	663	73.1	8.97
1.66484	0.0216351	1.17067	A0A3B6B092	Potassium transporter		15	8	772	86.1	8.54
3.38951	0.000407841	1.16601	A0A3B6JQ61	C-CAP/cofactor C-like domain-containing protein		15	3	338	36.8	6.46
2.37014	0.00426438	1.16526	A0A3B6AZK3	AAI domain-containing protein		30	4	126	12.4	8.88
1.99144	0.010199	1.14781	A0A3B6IUJ0	Uncharacterized protein		27	6	295	33.1	8.65
1.77072	0.0169543	1.14401	A0A3B6RRI0	PPM-type phosphatase domain-containing protein		13	4	398	43.3	4.97
1.37483	0.0421861	1.13568	U3PY10	Autophagy protein 5	ATG5b	12	2	370	41.1	5.16	defense response;metabolic process;response to stimulus;transport	cytoplasm
1.64222	0.0227918	1.13405	A0A3B6C9H5	Uncharacterized protein		29	8	453	48.6	7.03
1.43075	0.0370892	1.13402	A0A3B6FHA6	Chromatin-remodeling complex ATPase		5	5	1132	130.1	5.63
1.39707	0.0400799	1.13317	A0A3B6SG74	Uncharacterized protein		21	4	428	44.6	4.49
1.31321	0.0486172	1.12382	A0A3B6R7F1	Uncharacterized protein		3	2	1182	130.6	9.41
2.37687	0.00419889	1.11959	W4ZPL7	PRA1 family protein		12	2	209	24.2	10.43	transport	membrane
2.14928	0.0070912	1.11551	A0A3B6THB2	Uncharacterized protein		9	3	518	58.2	8.7
1.33389	0.046356	1.09853	A0A3B6IUE5	Inos-1-P_synth domain-containing protein		26	6	510	56.1	5.66
2.062	0.00866955	1.09276	A0A3B6H1C8	C2 domain-containing protein		15	3	369	37	8.07
1.49133	0.0322602	1.0924	A0A3B6PNM3	Uncharacterized protein		3	5	1744	195.5	4.96
2.0076	0.00982642	1.08897	A0A3B6TKA4	Uncharacterized protein		7	2	603	65	9.28
1.49554	0.0319489	1.08668	A0A3B6QA61	TPR_REGION domain-containing protein		22	8	428	45.1	4.96
2.52225	0.00300438	1.08478	A0A3B5ZTI7	Uncharacterized protein		25	5	228	24.9	5.31
2.00182	0.00995815	1.07096	A0A3B6SJ37	Alpha-amylase (EC 3.2.1.1) (1,4-alpha-D-glucan glucanohydrolase)		31	7	438	47.7	6.06
2.42649	0.00374549	1.06795	A0A3B6ER09	DEK_C domain-containing protein		9	3	467	52.2	9.01
1.66364	0.0216952	1.06277	A0A3B6HQP9	Uncharacterized protein		19	3	274	29.9	5.19
2.27744	0.00527912	1.05143	A0A3B6I2S0	Cellulose synthase (EC 2.4.1.12)		25	18	1078	121.7	7.18
1.7496	0.0177992	1.05045	A0A077RU30	Germin-like protein	TRAES_3BF075800080CFD_c1	37	5	173	18.3	7.52	regulation of biological process	extracellular	metal ion binding
1.38624	0.0410919	1.04258	A0A3B5YSY9	Carboxypeptidase (EC 3.4.16.-)		16	5	470	52.1	6.83
1.66621	0.0215669	1.04215	A1YE34	Ribosomal protein L3-B2 (Ribosomal protein L3B-2)	RPL3-B2 RPL3B-2	42	17	389	44.6	10.07	metabolic process	ribosome	structural molecule activity
1.76874	0.0170318	1.03934	A0A3B5YUD2	Uncharacterized protein		44	8	222	24.5	5.45
1.55564	0.0278205	1.03846	Q3MV21	Fructan exohydrolase	D31	12	7	595	66.8	5.5	metabolic process		catalytic activity
2.56319	0.00273408	1.03696	A0A3B6N140	Alpha-mannosidase (EC 3.2.1.-)		28	18	1025	114.2	6.11
1.65495	0.0221334	1.03272	A0A3B6JN13	Uncharacterized protein		42	6	229	24.5	6.18
2.20114	0.00629303	1.0293	W5G1Z4	Histone H2A		33	3	137	14.3	10.43		chromosome;nucleus	DNA binding;protein binding
2.14902	0.00709549	1.02155	A0A3B6B835	Sulfotransferase (EC 2.8.2.-)		42	9	322	36.4	6.44
1.73776	0.018291	1.00352	A0A3B6SLE4	AAI domain-containing protein		37	2	113	11.2	8.13
1.83534	0.0146102	0.99452	A0A3B6R9I1	Uncharacterized protein		8	3	465	51.1	7.18
1.41608	0.0383632	0.990619	A0A3B6NJA1	Uncharacterized protein		51	12	353	38.4	6.46
2.74504	0.0017987	0.989373	A0A3B6JQR7	Uncharacterized protein		34	5	226	24.9	6.35
2.17787	0.00663941	0.987606	A0A3B5Y2G4	Chitin-binding type-1 domain-containing protein		16	3	335	35.1	8.05
2.44626	0.00357878	0.986309	A0A3B6H395	RING-type domain-containing protein		10	2	370	40.4	5.3
2.0172	0.0096117	0.976447	A0A3B6R751	Acetyltransferase component of pyruvate dehydrogenase complex (EC 2.3.1.12)		45	20	541	58.3	7.47
1.63969	0.022925	0.975786	A0A3B6LGH9	Guanylate kinase-like domain-containing protein		13	3	393	43.1	5.76
3.70613	0.000196728	0.964565	A0A3B6LRA0	Tr-type G domain-containing protein		6	4	1045	114.9	6.49
1.58877	0.0257768	0.964237	P02276	Histone H2A.2.1		45	4	151	16	10.62		chromosome;nucleus	DNA binding;protein binding
1.56037	0.0275188	0.95789	A0A3B6HRH3	Peptidase S59 domain-containing protein		9	6	1008	113.3	5.24
2.72739	0.00187333	0.952554	A0A3B6PT24	Uncharacterized protein		13	6	785	81.6	7.36
1.86086	0.0137764	0.94849	A0A3B5ZMY8	Uncharacterized protein		17	4	371	40.4	6.2
1.77626	0.0167393	0.947042	A0A3B6R6T1	Acyl-coenzyme A oxidase		46	23	668	73.9	7.03
1.46012	0.0346643	0.937747	A0A3B5ZSU0	Uncharacterized protein		57	10	143	16.5	10.21
1.46644	0.0341631	0.933693	Q9SAS3	Heat shock protein 90 (Fragment)		49	8	167	19.8	5.24	metabolic process;response to stimulus		nucleotide binding;protein binding
1.40159	0.0396652	0.929761	P46274	Mitochondrial outer membrane porin (Voltage-dependent anion-selective channel protein) (VDAC)	VDAC1	59	12	275	28.9	8.44	transport	membrane;mitochondrion	transporter activity
1.38213	0.0414829	0.92815	A0A3B6TTY2	Uncharacterized protein		9	3	682	73.1	5.33
1.74395	0.0180324	0.92115	A0A3B5Y1L0	Uncharacterized protein		5	2	780	86.1	5.58
1.60736	0.0246967	0.91796	W5CU17	Uncharacterized protein	TRAES_3BF079700040CFD_c1	13	2	370	40.3	5.44	metabolic process		catalytic activity;protein binding
1.40068	0.039748	0.915451	A0A3B6ITY9	Histone H2A		39	4	156	16.4	10.55
2.09277	0.00807669	0.914003	A0A3B6TLY2	Abhydrolase_3 domain-containing protein		63	12	315	33.6	5.8
2.06893	0.00853239	0.912203	A0A3B5Z3X9	Uncharacterized protein		51	7	200	19.9	4.78
2.25518	0.00555675	0.91206	P46524	Dehydrin COR410 (Cold-induced COR410 protein)	COR410	47	11	262	28.2	5.29	response to stimulus
1.87938	0.0132014	0.908101	A0A3B6B146	Uncharacterized protein		24	8	460	50.1	6.38
1.75088	0.0177469	0.906895	A0A3B6FHY0	Malic enzyme		25	10	591	65.2	6.21
2.27122	0.00535524	0.90608	A0A3B6RIG6	Peroxidase (EC 1.11.1.7)		20	5	320	34.1	7.56
1.56268	0.0273726	0.900103	A0A3B5YSS6	Uncharacterized protein		13	4	435	47	5.8
3.19818	0.000633613	0.897364	A0A3B6JNQ0	Uncharacterized protein		62	12	360	39.3	6.4
1.92451	0.0118983	0.892618	A0A3B6LM87	Uncharacterized protein		12	2	227	24.1	9.04
1.92157	0.0119794	0.888622	A0A3B6EAD2	Uncharacterized protein		8	2	316	33.2	5.3
1.69968	0.0199675	0.887655	A0A1D5UXX7	Uncharacterized protein	CAMPLR22A2D_LOCUS311	12	2	242	26.9	7.84	metabolic process		catalytic activity;nucleotide binding
1.53714	0.0290309	0.87449	A0A3B5XY16	WD_REPEATS_REGION domain-containing protein		4	2	573	63	5.88
1.7543	0.0176078	0.869887	A0A3B6NN31	PHB domain-containing protein		7	2	480	52.9	6.2
1.41618	0.0383552	0.866475	A0A2X0S8N9	Peptidase A1 domain-containing protein	CAMPLR22A2D_LOCUS3809	17	6	500	52.1	6.95
2.4534	0.00352043	0.863064	A0A3B6KTB3	GRAM domain-containing protein		24	5	455	48.3	7.58
1.37051	0.0426079	0.861549	A0A3B6C1J2	Tim44 domain-containing protein		10	3	324	36	10.08
3.12504	0.000749821	0.860623	A0A3B6QHZ1	Annexin		57	16	315	35.3	6.81
2.16569	0.00682831	0.859882	W5ADK3	Uncharacterized protein		30	4	216	23.9	7.96	regulation of biological process;response to stimulus		catalytic activity;nucleotide binding
1.35919	0.0437326	0.847875	A0A3B6LLB3	TPT domain-containing protein		19	4	401	42.7	10.08
1.46072	0.0346159	0.839017	A0MAU9	Putative steroid membrane binding protein	MBP	45	6	223	24.2	4.72		membrane
1.48432	0.0327853	0.838939	A0A3B6C4U5	C2 domain-containing protein		45	4	168	18.4	6.93
1.73406	0.0184476	0.83743	A0A3B6EBP4	TauD domain-containing protein		8	2	334	36.7	5.78
2.34589	0.00450932	0.83685	A0A3B6SDT6	Uncharacterized protein		16	3	380	41.7	8
2.78777	0.00163017	0.825726	A0A3B6C6Z8	AAI domain-containing protein		30	4	126	12.6	8.72
1.33111	0.0466536	0.820042	A0A3B6DP11	Uncharacterized protein		22	12	836	91.7	4.97
1.51908	0.0302634	0.815248	A0A3B6IQM3	Transmembrane 9 superfamily member		10	4	585	66.7	8.38
3.29546	0.000506459	0.814604	A0A3B6JFI9	Threonine dehydratase (EC 4.3.1.19) (Threonine deaminase)		13	5	539	59	5.81
1.63439	0.0232065	0.813904	A0A3B6TN38	Uncharacterized protein		45	10	352	38.6	5.54
1.4884	0.0324791	0.813246	A0A3B6I5B5	Potassium transporter		15	10	778	86.6	8.75
1.35683	0.0439712	0.795469	A0A3B6TBW2	Uncharacterized protein		13	5	501	54.6	7.06
1.96919	0.0107352	0.794348	A0A3B6DJW5	Uncharacterized protein		32	8	348	38.1	7.49
1.9859	0.01033	0.7818	A0A3B6RLS6	ThiF domain-containing protein		23	6	328	36.1	5.12
1.30656	0.0493674	0.78155	A0A3B6EAU4	UBIQUITIN_CONJUGAT_2 domain-containing protein		13	9	1077	118.6	4.65
2.51746	0.00303764	0.776928	A0A1D6SCP9	Sucrose synthase (EC 2.4.1.13)		42	24	815	92.6	6.32	metabolic process		catalytic activity
1.50338	0.0313775	0.775994	A0A3B6RBD5	GDT1 family protein		16	2	232	25	7.37
1.73935	0.0182242	0.774277	A0A3B6PKQ9	Uncharacterized protein		33	7	387	39.4	6.29
1.40604	0.0392608	0.773919	A0A3B5Z274	Transcription elongation factor spt6		5	6	1569	175.6	5.72
4.26166	5.47449e-05	0.770355	A0A3B6HQX0	Asparagine synthetase [glutamine-hydrolyzing] (EC 6.3.5.4)		39	16	591	66	6.37
1.60859	0.0246269	0.763834	A0A3B6B3N5	Uncharacterized protein		19	4	299	31.8	9.45
2.24296	0.00571534	0.756678	A0A3B6PH58	Uncharacterized protein		5	6	2139	239.5	8.75
1.8583	0.0138579	0.756032	A0A3B6A203	FAD-binding PCMH-type domain-containing protein		18	5	540	59.6	6.68
1.587	0.0258823	0.755223	A0A3B5YY67	Peroxidase (EC 1.11.1.7)		11	2	332	34.3	7.31
2.31048	0.00489236	0.752216	A0A1D5V071	Uncharacterized protein	CAMPLR22A2D_LOCUS894	27	9	469	50	7.4		membrane	catalytic activity
2.52103	0.0030128	0.752097	A0A3B5Y606	1,2-dihydroxy-3-keto-5-methylthiopentene dioxygenase (EC 1.13.11.54) (Acireductone dioxygenase (Fe(2+)-requiring)) (ARD) (Fe-ARD)		13	2	183	21.5	5.47
2.11323	0.00770497	0.751404	A0A3B6NNX5	Uncharacterized protein		42	18	546	58.5	5.39
1.55126	0.0281021	0.751148	A0A3B6LP43	Uncharacterized protein		25	19	1459	155.5	4.65
1.68501	0.0206534	0.750591	A0A3B6TQ53	Uncharacterized protein		15	10	933	101.7	6.9
1.4805	0.0330746	0.750088	A0A3B6LXF3	M20_dimer domain-containing protein		6	2	449	47.5	6.84
1.75868	0.0174308	0.741643	A0A3B6RPP5	Glycosyltransferases (EC 2.4.-.-)		10	3	526	57.8	8.63
1.51959	0.0302281	0.738691	A0A3B5ZNP9	Poly [ADP-ribose] polymerase (PARP) (EC 2.4.2.-)		5	3	982	110.3	8.65
1.35859	0.0437935	0.737549	A0A3B6LGA8	Uncharacterized protein		20	4	289	30.2	7.46
3.2573	0.000552967	0.728633	A0A3B6JNZ3	RNA cytidine acetyltransferase (EC 2.3.1.-) (18S rRNA cytosine acetyltransferase)		7	4	882	99.4	7.49
2.57485	0.00266162	0.722397	A0A3B5ZU41	Peptidylprolyl isomerase (EC 5.2.1.8)		7	3	624	69.6	5.8
1.92556	0.0118698	0.721366	A0A3B6H1A2	Uncharacterized protein		10	4	551	59	7.62
1.5189	0.0302761	0.721233	A0A3B6GP60	FMN_red domain-containing protein		43	5	205	22.5	6.54
1.5555	0.0278291	0.715778	A0A3B6CF76	Uncharacterized protein		10	8	1257	136.5	8.34
1.66426	0.021664	0.703677	A0A3B6LN81	Acyl-[acyl-carrier-protein] hydrolase (EC 3.1.2.-)		15	6	363	40.3	6.84
3.03117	0.000930742	0.697949	A0A3B6ASI1	Uncharacterized protein		5	4	1251	135.8	5.43
1.66731	0.0215125	0.696874	A0A3B6QFL8	RRM domain-containing protein		16	4	351	41.1	5.73
1.64157	0.022826	0.685958	A0A3B6QKE8	SAM_MT_RSMB_NOP domain-containing protein		6	3	767	84.8	5.74
1.74694	0.0179086	0.680974	A0A3B6KC40	SAM_MPBQ_MSBQ_MT domain-containing protein		22	5	353	38.9	9.45
1.73981	0.0182048	0.678188	A0A3B6AWI8	Uncharacterized protein		23	8	427	46.2	5.12
1.65703	0.0220279	0.677406	A0A3B5ZN61	Uncharacterized protein		12	3	305	31.9	6.43
2.38577	0.00411368	0.675304	A0A3B6HTK2	Uncharacterized protein		26	7	459	49.8	7.24
1.41334	0.0386067	0.675267	A0A3B6MQ90	UBX domain-containing protein		13	4	430	46.1	8.27
1.34919	0.0447514	0.675163	A0A341W842	Plug_translocon domain-containing protein		31	9	477	52.5	8.98
2.23736	0.00578942	0.663434	A0A3B5YRI3	Cation_ATPase_N domain-containing protein		31	23	1057	114.3	5.62
2.04685	0.00897744	0.657468	A0A3B6DLT2	RRM domain-containing protein		12	2	232	25	5.43
2.06618	0.00858662	0.656958	A0A3B6JGM2	Uncharacterized protein		4	2	729	81.5	6.92
2.41323	0.00386161	0.655188	A0A3B6ING2	Lipoxygenase (EC 1.13.11.-)		68	38	821	91.4	6.48
1.45555	0.0350309	0.651488	A0A3B5Z3M7	Histone H4		50	5	103	11.4	11.47
1.43657	0.0365956	0.64838	A0A3B6EEK3	Uncharacterized protein		25	3	256	29.1	6.33
1.37814	0.041866	0.647032	A0A3B6MWY9	UBA domain-containing protein		5	2	386	42.6	6.27
1.42842	0.0372889	0.64685	A0A3B6LIR6	Uncharacterized protein		25	14	690	73.5	5.15
1.95121	0.0111889	0.643232	A0A3B5Z492	SAC domain-containing protein		28	12	664	75.2	8.94
1.88603	0.0130008	0.639591	A0A3B6PQA3	Uncharacterized protein		36	16	784	81	7.65
2.06071	0.00869542	0.639472	A0A3B5Y692	DNA replication complex GINS protein PSF2		13	2	202	23.3	7.55
1.44067	0.036252	0.638172	A0A3B5XZB3	Protein kinase domain-containing protein		11	4	714	79.2	6.55
1.64719	0.0225325	0.635224	A0A7H4LAU3			9	2	367	40.5	7.91
2.0497	0.00891867	0.632423	A0A1D5SS06	MHD domain-containing protein		32	9	379	43.6	6.83	transport
1.48741	0.0325527	0.629487	A0A3B6LSY3	Lipoxygenase (EC 1.13.11.-)		49	30	856	96.3	6.01
2.91543	0.00121497	0.626638	A0A3B6QF92	Uncharacterized protein		7	5	1072	116.4	9.36
1.32698	0.0471002	0.615585	A0A3B6PFH4	Carboxypeptidase (EC 3.4.16.-)		26	8	501	55.2	6.06
2.15686	0.00696855	0.612781	A0A3B6MVZ5	Aldo_ket_red domain-containing protein		37	10	350	37.7	5.97
1.93191	0.0116974	0.609862	A0A3B6TN56	Uncharacterized protein		8	2	482	51	5.57
1.43282	0.0369133	0.607717	A0A3B6IWR0	Uncharacterized protein		17	4	352	37.7	8.15
1.69893	0.020002	0.606309	A0A3B6DCM1	Uncharacterized protein		21	5	473	50.2	5.25
1.56662	0.0271259	0.605902	A0A3B6LIQ3	Transmembrane 9 superfamily member		14	5	595	67.7	8.65
1.94269	0.0114107	0.605416	A0A3B6IMW1	Oxidored_FMN domain-containing protein		71	21	362	40.3	6.2
1.69827	0.0200322	0.603849	A0A3B6C8Z4	Uncharacterized protein		58	13	364	38.9	7.69
1.4399	0.0363162	0.600291	A0A3B6KEH6	PlsC domain-containing protein		18	5	374	42.3	9.7
4.53011	2.95049e-05	0.600035	A0A3B5Y3T3	Uncharacterized protein		23	2	152	16	4.58
1.32319	0.0475126	0.594894	A0A3B6QHK6	BSD domain-containing protein		34	6	317	35.4	4.81
3.79612	0.000159911	0.594671	A0A3B6MYU6	Uncharacterized protein		27	25	1343	143.7	6.01
1.3163	0.0482729	0.591445	A0A3B6HUX5	Uridine kinase (EC 2.7.1.48)		7	2	489	54.5	6.96
1.81694	0.0152428	0.590653	A0A3B6C489	Thioredoxin domain-containing protein		20	7	485	54.4	7.36
2.92483	0.00118897	-0.58696	A0A3B6H0F0	Uncharacterized protein		23	8	382	42.8	6.87
1.52729	0.0296968	-0.58761	Q70EV9	Cytochrome P450	CYP98A11	32	14	512	57.9	7.84	metabolic process		catalytic activity;metal ion binding
1.52758	0.0296771	-0.587949	A0A3B6H0S7	Amidohydro-rel domain-containing protein		13	3	536	57.5	6.71
1.93065	0.0117313	-0.588842	A0A3B6EGA8	Uncharacterized protein		47	32	1172	127.5	6.1
1.42871	0.0372644	-0.590256	A0A3B5Z4B3	TMF_TATA_bd domain-containing protein		6	5	1029	114.7	4.79
2.59642	0.00253267	-0.590368	A0A3B6EIV6	KH_dom_type_1 domain-containing protein		49	6	239	26.1	8.95
1.84946	0.0141431	-0.591294	A0A3B6RKE1	Glyceraldehyde-3-phosphate dehydrogenase (EC 1.2.1.-)		71	17	333	36.2	6.89
1.42737	0.0373791	-0.593045	A0A3B6FUI5	Usp domain-containing protein		57	10	264	27.8	5.19
1.93992	0.0114837	-0.597861	A0A3B6JPB4	Uncharacterized protein		26	8	527	55.1	4.98
2.74778	0.00178739	-0.601485	A0A3B5YQP2	Uncharacterized protein		58	3	74	7.8	4.88
3.04163	0.000908596	-0.602345	A0A3B6B8Q6	Dihydroorotate dehydrogenase (quinone), mitochondrial (DHOdehase) (EC 1.3.5.2)		9	3	511	54	9.28
1.48849	0.0324723	-0.602809	A0A3B5Z3H0	Ribosomal_L12 domain-containing protein		22	3	245	25.9	9.73
1.45466	0.0351023	-0.604058	A0A3B5XXS0	Uncharacterized protein		34	5	296	32.6	6.52
2.88582	0.00130071	-0.606073	A0A3B6GRG0	LRRNT_2 domain-containing protein		6	3	580	63.3	5.45
1.49518	0.0319758	-0.611075	A0A3B6SJ29	Uncharacterized protein		53	10	235	25.3	5.44
1.32509	0.0473049	-0.611842	A0A3B6PJM1	Glyceraldehyde-3-phosphate dehydrogenase (EC 1.2.1.-)		51	12	416	43.8	7.46
2.06654	0.00857942	-0.613162	A0A3B6S9U6	Uncharacterized protein		10	2	401	40	4.98
1.96271	0.0108966	-0.61434	A0A077S075	Cog4 domain-containing protein	TRAES_3BF116200110CFD_c1	8	4	760	83.9	5.4	transport
1.69499	0.0201841	-0.620293	A0A3B6NX87	Uncharacterized protein		11	4	648	70.3	6.73
1.85443	0.0139821	-0.620938	A0A3B6NJD4	L-lactate dehydrogenase (EC 1.1.1.27)		62	11	358	38	7.06
2.00753	0.00982805	-0.62121	A0A3B6B9G2	RCK N-terminal domain-containing protein		11	6	1149	122.1	5.36
2.10448	0.00786169	-0.621535	A0A3B6JRR9	Coatomer subunit alpha		49	44	1218	135.9	7.01
3.10405	0.000786954	-0.622908	A0A3B6RK39	Epimerase domain-containing protein		35	7	323	35.1	6.43
1.7357	0.018378	-0.623803	A0A3B6RKM9	Uncharacterized protein		12	3	285	31.1	6.71
1.44812	0.0356352	-0.625571	A0A3B6EMT7	Uncharacterized protein		35	8	439	48.6	6.87
1.66444	0.021655	-0.631531	A0A3B6B848	Anamorsin homolog (Fe-S cluster assembly protein DRE2 homolog)		58	9	267	27.9	4.89
2.16159	0.00689304	-0.632305	A0A3B6AV40	Uncharacterized protein		34	11	453	48	5
1.44274	0.0360795	-0.63345	A0A3B6EM13	Uncharacterized protein		72	12	256	27.3	5.48
1.9504	0.0112098	-0.633937	A0A3B6PM55	Uncharacterized protein		16	3	350	38.4	5.19
1.89208	0.012821	-0.635972	A0A3B6NN02	C2 domain-containing protein		15	3	300	30.9	4.91
1.44576	0.0358294	-0.637104	A0A3B6NT73	Uncharacterized protein		22	4	240	27	9.13
1.55375	0.0279416	-0.64186	A0A3B6TI06	Uncharacterized protein		18	5	473	50.2	6.89
1.36257	0.043394	-0.642048	A0A3B6C304	Uncharacterized protein		58	14	360	40.9	6.99
1.89428	0.0127562	-0.642439	A0A3B6SKZ0	Uncharacterized protein		9	2	339	37	7.64
1.67331	0.0212175	-0.64322	A0A3B6QK76	Glucosamine 6-phosphate N-acetyltransferase (EC 2.3.1.4)		17	2	163	17.5	6.55
2.44634	0.00357814	-0.648172	Q9FS04	Cysteine proteinase inhibitor (Fragment)	WC3	66	7	125	13.8	6.57	regulation of biological process		enzyme regulator activity
1.48556	0.0326919	-0.650049	A0A3B6TBV3	Uncharacterized protein		19	8	714	79.5	5
1.36137	0.0435144	-0.650791	A0A3B6IJ72	Tubulin beta chain		69	22	445	49.7	4.83
1.90824	0.0123527	-0.651068	A0A3B6UC51	C2 domain-containing protein		14	3	282	31.1	8.35
1.55316	0.0279793	-0.651886	A0A3B6GTQ1	Uncharacterized protein		24	4	201	21.9	5.16
1.5804	0.0262786	-0.652594	A0A1D5UNV1	HP domain-containing protein	CAMPLR22A2D_LOCUS4329 CAMPLR22A2D_LOCUS4346	5	4	939	104.9	6.37	cell organization and biogenesis		protein binding
1.54134	0.0287513	-0.653217	A0A3B6NLY0	Glyceraldehyde-3-phosphate dehydrogenase (EC 1.2.1.-)		45	11	416	43.8	8.05
3.29037	0.000512422	-0.653407	A0A3B6UBD1	Tubulin beta chain		68	24	448	50.2	4.83
1.70554	0.0196996	-0.653733	A0A3B6RKH6	PCI domain-containing protein		39	9	425	47.4	6.16
1.89524	0.0127279	-0.653744	A0A3B6ASY3	FAD-binding PCMH-type domain-containing protein		8	3	581	62.8	9.14
1.59588	0.0253585	-0.654713	A0A3B6MLA0	Uncharacterized protein		14	6	889	98.3	6.81
1.37452	0.0422165	-0.656022	A0A077RQG5	Uncharacterized protein	TRAES_3BF099900090CFD_c1	26	7	542	58.7	6.74
2.12987	0.00741532	-0.659302	A0A3B6B565	FMN hydroxy acid dehydrogenase domain-containing protein		38	10	369	40.7	7.88
1.52481	0.0298672	-0.664665	A0A077RSI3	Uncharacterized protein	TRAES_3BF079100070CFD_c1	93	16	253	26.8	5.69	metabolic process;response to stimulus	cytosol;extracellular;membrane;mitochondrion;vacuole	catalytic activity;metal ion binding
1.61899	0.0240441	-0.664976	W5ASA4	Uncharacterized protein	CAMPLR22A2D_LOCUS2419	55	4	154	17.4	10.27	metabolic process	ribosome	RNA binding;structural molecule activity
1.4257	0.0375234	-0.666117	A0A3B6STT5	Protein kinase domain-containing protein		8	5	1091	117.9	6.04
1.49228	0.0321901	-0.666875	A0A3B6SFU0	Uncharacterized protein		7	2	396	44.5	6.24
1.32659	0.0471421	-0.667337	A0A3B6A1E9	Uncharacterized protein		29	6	216	24.1	5.95
3.40689	0.000391838	-0.67002	A0A3B5Y3M4	Clat_adaptor_s domain-containing protein		27	4	177	19.3	4.65
1.41006	0.0388993	-0.671157	A0A3B6C253	Importin N-terminal domain-containing protein		13	8	1016	114.1	5.63
1.64528	0.0226319	-0.67336	A0A3B6B887	Peroxidase (EC 1.11.1.7)		48	10	341	36.5	5.96
1.50785	0.031056	-0.673411	A0A096UN06	Peroxidase (EC 1.11.1.7)	CAMPLR22A2D_LOCUS4516	32	9	362	37.5	6.77	metabolic process;response to stimulus	extracellular	antioxidant activity;catalytic activity;metal ion binding
1.89975	0.0125966	-0.673579	A0A3B6LJ71	Uncharacterized protein		28	5	325	33.9	4.91
1.36478	0.0431738	-0.678953	A0A3B6C3M3	LRRNT_2 domain-containing protein		7	2	334	36.3	7.25
1.42952	0.0371943	-0.680105	A0A3B6N0X4	Protein kinase domain-containing protein		28	6	368	40.6	6.67
1.83396	0.0146567	-0.68052	A0A1D5UQX6	Uncharacterized protein	CAMPLR22A2D_LOCUS2851	33	4	158	16.6	3.92
2.34866	0.00448063	-0.682828	A0A3B6ATM1	Peroxidase (EC 1.11.1.7)		20	5	335	35.5	9.04
1.88684	0.0129765	-0.684217	A0A3B6PMY0	Uncharacterized protein		10	3	401	45.1	7.5
1.30783	0.0492233	-0.687316	A0A3B6DKB4	FabA domain-containing protein		16	3	217	23.6	9.29
1.77843	0.0166559	-0.688388	A0A3B6TNV8	Glycosyltransferase (EC 2.4.1.-)		22	7	475	50.6	5.69
1.37459	0.0422091	-0.691607	A0A3B6LNG6	Uncharacterized protein		17	3	236	26.1	6.09
1.42479	0.0376019	-0.691942	A0A3B6LRN5	Uncharacterized protein		17	4	284	31.3	6.34
1.32535	0.0472765	-0.692675	A0A3B5Z0H5	Uncharacterized protein		25	5	375	42.4	6.46
2.26923	0.00537979	-0.693956	A0A1D6CTY7	Uncharacterized protein		63	5	141	15.7	8.32		membrane;mitochondrion;vacuole	protein binding
2.75764	0.00174727	-0.69468	A0A3B6EPS2	RRM domain-containing protein		28	3	226	22.7	5.41
2.96907	0.00107381	-0.694738	A0A3B6CCC4	Phospholipid scramblase		8	2	360	40	8.87
3.24825	0.000564607	-0.695377	A0A3B5YYS5	Pyruvate, phosphate dikinase (EC 2.7.9.1)		44	27	939	101.9	5.96
2.08537	0.00821533	-0.696027	A0A3B6TCJ3	Acylphosphatase (EC 3.6.1.7)		46	2	113	11.7	7.53
1.77993	0.0165986	-0.696812	A0A1D5UUT1	Uncharacterized protein	CAMPLR22A2D_LOCUS550	33	4	229	24.7	8.44
2.27336	0.00532897	-0.699017	A0A3B6D594	Amidase domain-containing protein		19	7	598	65.1	5.81
2.58983	0.00257139	-0.699614	A0A3B6TDT8	Uncharacterized protein		10	3	305	33	6.84
1.58937	0.0257414	-0.700887	A0A3B6B0S4	Amine oxidase (EC 1.4.3.-)		29	14	719	81	7.25
2.32594	0.00472129	-0.700977	A0A3B6A021	Uncharacterized protein		58	9	288	30.6	9.31
1.35436	0.0442227	-0.702272	A0A3B6NVX6	Uncharacterized protein		20	5	521	55.8	6.79
1.41229	0.0386999	-0.703292	A0A3B5Y1M2	Uncharacterized protein		8	7	1632	178.5	6.19
1.58395	0.0260646	-0.703292	A0A3B6FRF6	Protein VACUOLELESS1		7	4	871	95.6	6.13
3.00131	0.000996993	-0.708287	A0A1D6CXF2	Proteasome subunit alpha type (EC 3.4.25.1)		38	7	249	27.3	7.43	metabolic process	cytoplasm;nucleus;proteasome	catalytic activity
1.38542	0.0411697	-0.708666	A0A3B6TND5	Peptidase A1 domain-containing protein		7	2	490	52	6.39
1.40363	0.0394791	-0.709229	A0A2X0SIY5	DUF4205 domain-containing protein	CAMPLR22A2D_LOCUS2992	26	10	651	70.3	5.06
1.49416	0.032051	-0.712514	A0A3B5YTI9	DUF4005 domain-containing protein		18	6	480	52.4	10.07
2.11898	0.00760364	-0.71384	A0A3B6KLQ9	Glycosyltransferase (EC 2.4.1.-)		33	8	473	50.4	6.21
1.33484	0.0462552	-0.714329	A0A3B6RJ71	Uncharacterized protein		20	5	389	41.5	6.71
3.01368	0.000968987	-0.719079	A0A3B6ISH5	Uncharacterized protein		22	2	204	22.1	8.78
4.18049	6.59941e-05	-0.720428	A0A3B6B862	Peroxidase (EC 1.11.1.7)		48	12	370	39	5.72
2.1006	0.00793239	-0.720707	A0A1W5RME7	Translocase of chloroplast (EC 3.6.5.-)		29	8	326	36.3	9.26	transport	membrane	catalytic activity;metal ion binding;nucleotide binding;transporter activity
1.81824	0.0151972	-0.721053	A0A3B6KME7	Lipoxygenase (EC 1.13.11.-)		53	32	864	96.7	6.84
3.37757	0.000419204	-0.721486	A0A3B6TNH7	C-CAP/cofactor C-like domain-containing protein		23	7	573	61.8	5.45
1.7026	0.0198335	-0.722069	A0A3B6CH98	Peroxidase (EC 1.11.1.7)		46	10	341	36.6	6.29
2.11787	0.00762316	-0.722104	A0A3B6TN57	Uncharacterized protein		24	5	408	44	9.47
1.79415	0.0160639	-0.724036	A0A3B6T8T6	Uncharacterized protein		25	6	407	44.4	5.91
1.44399	0.035976	-0.725469	A0A1D5UFU5	ATP-dependent Clp protease proteolytic subunit (EC 3.4.21.92)	CAMPLR22A2D_LOCUS3755	22	3	300	31.9	7.62	metabolic process	membrane;mitochondrion	catalytic activity;metal ion binding
1.49179	0.0322262	-0.72636	A0A3B6IJN2	4HBT domain-containing protein		36	4	162	17.2	7.42
1.95561	0.0110761	-0.727751	A0A3B5YUP3	Phosphotransferase (EC 2.7.1.-)		11	3	463	50.2	6.14
1.85568	0.0139417	-0.728969	A0A3B6EK73	Uncharacterized protein		72	27	557	60.6	5.68
1.39336	0.040424	-0.731395	A0A3B6SFQ5	Uncharacterized protein		4	2	625	68.8	5.77
2.17497	0.00668387	-0.731665	A0A3B6RDP2	Uncharacterized protein		23	3	238	25.7	7.66
1.48311	0.0328765	-0.733907	A0A3B6ARA1	Vps54 domain-containing protein		19	10	994	108.7	5.95
2.51704	0.00304057	-0.735448	A0A3B6TPG7	Uncharacterized protein		73	10	247	27.1	5.17
2.0319	0.00929174	-0.737262	A0A3B6B4X4	Uncharacterized protein		15	9	739	81.3	5.05
1.43872	0.0364153	-0.737421	W5D1R5	Uncharacterized protein	TRAES_3BF044200230CFD_c1	16	3	350	39.8	4.81			protein binding
2.11193	0.007728	-0.740046	A0A3B6K9H6	dUTPase domain-containing protein		16	2	222	22.7	9.63
1.84697	0.0142243	-0.741156	A0A3B6RL54	Inositol polyphosphate multikinase (EC 2.7.1.140) (EC 2.7.1.151)		25	5	362	38.9	7.55
1.38231	0.0414661	-0.741809	I3NM30	Putative non-cyanogenic beta-glucosidase	4N5.4	40	13	507	56.4	8.98	metabolic process		catalytic activity;protein binding
2.67601	0.00210857	-0.744867	A0A3B6FMC4	Uncharacterized protein		28	21	1179	129.2	5.86
1.39678	0.0401074	-0.745523	A0A3B6HT38	Uncharacterized protein		20	9	711	79.7	5.82
2.0588	0.00873376	-0.746066	A0A3B6HUF8	Dirigent protein		14	2	181	18.7	8.09
1.35568	0.0440879	-0.747712	A0A3B6AR03	S5A_REDUCTASE domain-containing protein		9	2	326	37.7	8.97
1.78608	0.0163651	-0.751862	Q2QKB4	Splicing factor U2af large subunit B (U2 auxiliary factor 65 kDa subunit B) (U2 small nuclear ribonucleoprotein auxiliary factor large subunit B) (U2 snRNP auxiliary factor large subunit B)	U2AF65B U2AF65	22	6	543	60.5	7.71	metabolic process	nucleus	RNA binding
2.22824	0.00591233	-0.754065	A0A3B5ZV61	Uncharacterized protein		61	7	237	25	5.21
2.86332	0.00136986	-0.757135	M5AJV9	Hemoglobin 1	TaBWHb-1	55	8	162	18	8.12	transport	cytosol;membrane	metal ion binding;transporter activity
2.23035	0.00588364	-0.759798	A0A3B6SG97	Uncharacterized protein		25	12	791	86.8	6.09
2.14828	0.00710749	-0.761321	A0A3B6MWC1	Pep3_Vps18 domain-containing protein		10	5	992	111.5	5.66
1.36278	0.0433732	-0.761845	A0A3B5XYT2	Uncharacterized protein		6	2	596	65.5	7.11
1.50257	0.0314363	-0.766904	A0A3B6ET24	Uncharacterized protein		42	4	104	11.6	10.37
1.70025	0.0199413	-0.767133	A0A3B6TDG9	CBFD_NFYB_HMF domain-containing protein		16	3	199	21.5	5.81
1.73286	0.0184988	-0.771864	A0A2P1E8T1	Fructose-1,6-bisphosphate aldolase 20	FBA20	31	24	1382	148	5.88
1.63488	0.0231801	-0.771999	C4IXS2	Inositol-1-monophosphatase (EC 3.1.3.25)		33	6	267	28.9	5.68	metabolic process;response to stimulus	cytosol;membrane	catalytic activity;metal ion binding
3.4336	0.000368465	-0.780832	A0A3B6TKY5	Uncharacterized protein		48	9	271	30.3	6.8
1.98318	0.0103949	-0.782683	A0A3B6KFB8	NAD(P)-bd_dom domain-containing protein		35	5	294	31.2	9.57
2.15465	0.00700411	-0.783758	A0A3B6KS84	Peptidyl-prolyl cis-trans isomerase (PPIase) (EC 5.2.1.8)		25	3	198	21.4	8.18
2.42883	0.00372535	-0.784833	A0A3B5ZYU5	Thioredoxin		75	5	126	13.4	5.22
2.33601	0.00461309	-0.784864	A0A3B5XZG4	Uncharacterized protein		47	6	234	24.7	5.2
1.72868	0.0186775	-0.789193	A0A3B6EAC3	Protein RER1		14	2	199	22	9.73
2.13717	0.0072917	-0.789905	A0A3B6LJK6	Uncharacterized protein		8	3	732	80.9	6.2
1.42411	0.0376608	-0.796644	A0A3B6EQU7	Uricase (EC 1.7.3.3) (Urate oxidase)		32	6	307	34.4	8.25
1.57657	0.0265113	-0.797122	A0A3B6TNL7	MINDY_DUB domain-containing protein		17	6	717	78.3	4.44
1.90912	0.0123275	-0.797415	A0A3B6DMH7	Uncharacterized protein		35	7	406	41.8	7.71
2.13998	0.00724471	-0.800508	A0A3B6PLI9	Uncharacterized protein		19	7	599	66	8.12
1.45113	0.035389	-0.800837	A0A3B6NP96	Uncharacterized protein		51	12	407	44.6	5.11
1.51924	0.0302525	-0.804757	W5D322	Uncharacterized protein	TRAES_3BF013300030CFD_c1	71	27	557	60.6	5.6	metabolic process	cytoplasm	catalytic activity;metal ion binding
1.89654	0.0126899	-0.807076	A0A3B6GVD0	Uncharacterized protein		37	13	601	67.3	4.81
1.71742	0.0191682	-0.810745	A0A341YDG0	NTF2 domain-containing protein		63	5	122	13.2	6.11
1.87315	0.0133922	-0.810871	A0A3B6CB11	Uncharacterized protein		6	11	3077	333.8	6.23
2.07924	0.0083323	-0.81502	A0A3B6B5P1	Uncharacterized protein		71	19	348	38.9	6.64
1.94393	0.0113782	-0.818694	A0A3B5ZQJ8	Uncharacterized protein		31	5	249	27.9	6.11
2.72614	0.00187872	-0.824705	A0A3B6PI96	Uncharacterized protein		28	5	368	40.3	5.81
2.39082	0.00406612	-0.829833	P24846	4-hydroxy-tetrahydrodipicolinate synthase 1, chloroplastic (HTPA synthase 1) (EC 4.3.3.7)		25	5	388	42.4	7.39	metabolic process		catalytic activity
1.85069	0.014103	-0.831416	A0A3B6B5U1	Uncharacterized protein		10	2	403	42	6.43
2.16418	0.00685206	-0.832732	A0A3B6EEB5	Uncharacterized protein		12	5	658	72.6	8.16
1.93047	0.0117364	-0.833126	D4NYD5	Cytosolic aconitase (Fragment)	cACO	51	16	456	50.2	6.18	metabolic process
1.83026	0.0147821	-0.83461	A0A3B6TTA7	Phospholipase D (EC 3.1.4.4)		29	14	824	92.2	6.51
1.55014	0.0281744	-0.838797	A0A3B6S9M7	40S ribosomal protein S30		18	2	62	6.9	12.03
1.80513	0.0156629	-0.839032	A0A3B6MLN0	t-SNARE coiled-coil homology domain-containing protein		9	2	258	28.9	7.42
2.39344	0.00404166	-0.840558	A0A3B6NIU6	Uncharacterized protein		3	2	1024	115.9	5.86
1.88464	0.0130425	-0.84159	A0A3B6B0Z9	Uncharacterized protein		28	7	416	44.8	5.27
1.59271	0.025544	-0.8445	A0A3B6PUE8	Ribonucleoside-diphosphate reductase (EC 1.17.4.1)		23	12	812	91.3	6.95
1.36028	0.0436234	-0.844798	A0A077RQY6	Uncharacterized protein	TRAES_3BF013900030CFD_c1	10	2	513	55.7	8.65	metabolic process	nucleus
1.66061	0.021847	-0.848535	D8LAL9	Hydroquinone glucosyltransferase, putative, expressed	HGT_1 TAA_ctg0011b.00250.1	18	6	493	52.4	5.74	metabolic process		catalytic activity
2.0787	0.00834261	-0.849468	A0A3B6A138	Eukaryotic translation initiation factor 3 subunit D (eIF3d) (Eukaryotic translation initiation factor 3 subunit 7) (eIF-3-zeta)		50	18	588	65.6	5.72
1.67885	0.0209486	-0.850046	A0A3B6EBA4	Uncharacterized protein		9	2	238	26.1	7.27
1.57926	0.0263478	-0.851501	A0A3B5XVK4	Germin-like protein		11	2	255	26.5	8.46
1.38379	0.0413247	-0.851616	A0A3B6IZW3	Uncharacterized protein		30	5	272	29.7	8.72
2.01705	0.00961505	-0.860811	A0A3B5XZ44	Uncharacterized protein		5	2	457	50.9	7.21
1.31837	0.0480434	-0.869993	A0A3B5Y6T2	Uncharacterized protein		44	3	147	16.1	5.43
2.36669	0.00429848	-0.870301	A0A077RTQ6	Protein farnesyltransferase subunit beta (FTase-beta) (EC 2.5.1.58)	TRAES_3BF075400020CFD_c1	7	3	488	53	6	metabolic process;regulation of biological process		catalytic activity
1.66907	0.0214257	-0.873095	A0A3B6ARB9	Dihydrolipoamide acetyltransferase component of pyruvate dehydrogenase complex (EC 2.3.1.-)		13	3	511	55.3	7.2
2.11419	0.00768791	-0.875554	A0A3B6QER2	Uncharacterized protein		19	2	231	25.3	9.51
2.50626	0.00311699	-0.879842	A0A3B6PSX9	Uncharacterized protein		2	3	2184	244.6	5.43
1.53206	0.0293726	-0.890474	A0A3B6C6E8	Uncharacterized protein		28	8	425	46.9	5.96
1.46362	0.0343862	-0.894796	A0A2X0TJ32	Uncharacterized protein	CAMPLR22A2D_LOCUS1419	6	4	1006	112.9	6.46
1.31717	0.0481761	-0.895703	A0A3B6QC33	T-complex protein 1 subunit eta (TCP-1-eta) (CCT-eta)		63	28	557	60	6.64
3.30995	0.00048983	-0.901402	Q9SAU8	HSP70	TaHSP70d	58	24	648	71	5.25	cell organization and biogenesis		nucleotide binding
2.4786	0.00332197	-0.904015	A0A3B6CJF7	Peroxidase (EC 1.11.1.7)		52	10	341	35.3	6.54
1.59194	0.0255893	-0.907145	A0A3B6JL78	PEROXIDASE_4 domain-containing protein		76	15	250	27.5	6.35
1.37299	0.0423649	-0.910459	A0A3B6RLI7	Uncharacterized protein		54	34	918	104.5	6.29
2.85904	0.00138344	-0.920933	A0A3B6B1G3	Protoporphyrinogen oxidase (EC 1.3.3.4)		21	6	539	58.4	9.22
1.55509	0.0278554	-0.922761	A0A3B6GU52	Glycine cleavage system P protein (EC 1.4.4.2)		53	31	1031	111	6.9
3.85458	0.000139771	-0.923269	A0A3B5YWD1	Uncharacterized protein		11	7	630	70.9	5.55
1.92815	0.011799	-0.932847	A0A3B6QH86	Cytochrome b-c1 complex subunit Rieske, mitochondrial (EC 7.1.1.8)		21	5	270	29.6	8.07
1.92489	0.0118881	-0.934867	A0A3B6PLX2	UVR domain-containing protein		39	24	916	101.4	6.16
2.09762	0.00798688	-0.93597	A0A3B6B612	Uncharacterized protein		31	6	292	32.1	6.28
1.823	0.0150314	-0.942612	A0A3B6KEW1	Ribosome assembly factor mrt4		21	3	234	26.4	9.5
1.9371	0.0115585	-0.942827	A0A3B6HQI0	AAA domain-containing protein		33	11	450	49.7	6.21
1.37413	0.0422544	-0.945491	A0A3B6GTM0	Uncharacterized protein		56	9	248	27.8	7.69
2.86309	0.00137059	-0.946466	A0A3B6D8R8	DUF4057 domain-containing protein		10	2	248	26.2	8.7
2.49414	0.00320522	-0.948107	A0A3B6DL62	diacylglycerol kinase (EC 2.7.1.107)		15	5	498	55	7.05
2.04676	0.00897924	-0.948343	A0A3B6TM98	Acyl carrier protein		21	2	132	14.2	5.72
1.58165	0.0262031	-0.952777	A0A3B6AQ54	Aldo_ket_red domain-containing protein		15	3	329	35.4	6.14
1.51361	0.0306472	-0.952887	A0A3B6IVJ1	Peptidase A1 domain-containing protein		17	3	430	44.6	7.11
2.27379	0.00532369	-0.952897	A0A3B5Y6Y9	Uncharacterized protein		13	5	558	59.6	6.4
3.08896	0.000814782	-0.952964	A0A3B6QKV4	PLAT domain-containing protein		34	4	185	19.4	5.76
1.91178	0.0122523	-0.969657	A0A3B6HRA4	TENA_THI-4 domain-containing protein		19	2	221	24.8	4.86
2.03585	0.00920777	-0.969694	A0A3B6B4Z6	Chorein_N domain-containing protein		3	2	1210	132.4	5.72
1.8662	0.0136082	-0.973634	A0A3B6C540	GYF domain-containing protein		6	6	1704	185.2	6.8
1.83108	0.0147543	-0.977378	A0A3B6JNZ9	Uncharacterized protein		37	8	323	36.1	6.73
1.83436	0.0146433	-0.988118	A0A3B6S9N8	Uncharacterized protein		4	2	845	89.1	6.39
1.90967	0.012312	-0.988487	F8S6T7	Pathogenesis-related protein 1-7	Pr-1-7	78	5	165	17.8	4.49		extracellular
2.83438	0.00146426	-0.990927	A0A3B6KQU4	GRAS domain-containing protein		9	2	501	55.3	6.07
1.637	0.0230673	-0.993767	W5A520	SUI1 domain-containing protein		59	3	115	12.6	8.43	metabolic process		RNA binding
1.98135	0.0104387	-0.994248	A0A3B6CHN3	Protein kinase domain-containing protein		16	6	394	44.2	6.6
1.41434	0.038518	-0.997416	A0A3B6JJA3	Uncharacterized protein		16	4	510	54.4	5.74
1.30751	0.04926	-1.00161	Q1ANA7	Vesicle-associated membrane protein-associated protein		24	3	238	25.7	7.68		membrane
1.48576	0.0326766	-1.00378	A0A3B6HPL1	Uncharacterized protein		14	3	476	51.5	5.27
2.39274	0.00404819	-1.01266	A0A481S232	Auxin-repressed 12.5 kDa protein (Fragment)		58	3	114	12.3	9.32
1.57231	0.0267728	-1.01388	A0A3B6QEN0	Rhodanese domain-containing protein		37	3	133	13.9	8.13
1.85497	0.0139646	-1.0174	A0A3B6RQV8	AAI domain-containing protein		34	3	133	13.6	7.43
1.82111	0.015097	-1.01846	A0A3B6MYV4	Uncharacterized protein		25	4	362	39.7	4.79
1.99579	0.0100975	-1.02322	W5D0N2	L51_S25_CI-B8 domain-containing protein	TRAES_3BF161200030CFD_c1	20	2	119	13.6	10.56
2.73884	0.00182458	-1.02343	A0A3B6FPI7	RWD domain-containing protein		24	3	246	27.8	4.21
2.67001	0.00213792	-1.02467	A0A7H4LHI6			17	3	224	23.9	7.2
1.4288	0.0372562	-1.02531	A0A3B6TKG9	Uncharacterized protein		17	2	219	22.4	6.28
1.86366	0.0136879	-1.02946	A0A3B6B8R9	Peroxidase (EC 1.11.1.7)		38	8	341	36.5	5.96
1.74885	0.0178298	-1.03566	A0A3B6IQ31	Uncharacterized protein		28	7	433	46.2	8.37
1.59274	0.0255425	-1.03633	A0A3B6U3F1	Fe2OG dioxygenase domain-containing protein		45	9	388	42.5	6.25
2.81253	0.00153981	-1.04106	A0A3B6QEB1	Uncharacterized protein		37	7	342	36.8	6.13
1.45417	0.0351421	-1.04962	A0A3B6PG68	Aspartate aminotransferase (EC 2.6.1.1)		50	14	426	47.4	6.84
2.31547	0.00483646	-1.05027	A0A3B6GM28	Uncharacterized protein		32	3	177	18.8	8.03
1.74973	0.0177937	-1.05173	A0A3B6BXY2	Stress-response A/B barrel domain-containing protein		37	3	111	12.2	5.67
1.96346	0.0108777	-1.05323	A0A1D5UL37	Peroxidase (EC 1.11.1.7)	CAMPLR22A2D_LOCUS5724	46	9	344	35.7	5.94	metabolic process;response to stimulus	extracellular	antioxidant activity;catalytic activity;metal ion binding
1.47018	0.0338707	-1.05404	A0A3B6HV35	Usp domain-containing protein		28	4	169	18	6.32
2.21406	0.00610858	-1.05621	A0A3B6A1T4	Uncharacterized protein		7	3	574	60.6	5.47
1.89463	0.0127458	-1.05833	A0A3B6EIE9	Methyltransf_11 domain-containing protein		14	5	505	57.1	5.36
2.28725	0.00516114	-1.05845	A0A3B5ZPT1	Aminotran_1_2 domain-containing protein		65	18	402	43.7	6.55
1.38201	0.041494	-1.06144	A0A3B6CA09	Uncharacterized protein		32	11	597	68.6	6.96
1.67546	0.0211125	-1.06181	A0A3B5XZA8	Rab-GAP TBC domain-containing protein		5	2	552	62	6.23
1.48802	0.0325071	-1.06232	A0A3B6TRK4	Uncharacterized protein		4	3	1000	109	6.35
1.3878	0.0409446	-1.0625	A0A3B6JHW0	Uncharacterized protein		59	8	293	31.1	6.51
1.44606	0.0358045	-1.06281	A0A3B6CD87	Uncharacterized protein		31	7	436	47.2	6.15
1.32483	0.047334	-1.06438	A0A3B5Y201	Protein kinase domain-containing protein		4	2	605	66.7	7.39
1.46442	0.0343225	-1.06793	A0A3B5YY55	Uncharacterized protein		22	14	972	109.2	6.46
2.17921	0.00661902	-1.07021	A0A3B6LIS6	Dihydrolipoamide acetyltransferase component of pyruvate dehydrogenase complex (EC 2.3.1.-)		25	7	459	47.7	8.57
2.71702	0.00191856	-1.07389	A0A3B6RNA7	Uncharacterized protein		28	9	531	59.4	8.84
1.55008	0.0281788	-1.07503	A0A3B6LMN7	PDZ domain-containing protein		41	3	213	23	5.64
1.99063	0.010218	-1.07708	A0A3B6JL41	Phosphoserine aminotransferase (EC 2.6.1.52)		41	13	422	44.5	8.31
1.34651	0.0450283	-1.07936	A0A3B6DL48	Usp domain-containing protein		42	3	140	15.2	5.47
1.75184	0.0177076	-1.08497	A0A3B6RIM0	Methionine aminopeptidase 2 (MAP 2) (MetAP 2) (EC 3.4.11.18) (Peptidase M)		20	5	448	49.5	6.15
1.73345	0.0184736	-1.09816	A0A3B5ZZB4	NOT2_3_5 domain-containing protein		9	3	559	60	8.46
2.58102	0.0026241	-1.09883	A0A3B6CH89	Peroxidase (EC 1.11.1.7)		36	9	341	35.4	7.9
1.37868	0.0418141	-1.09936	A0A3B6E9G7	Uncharacterized protein		11	2	261	26.1	6.77
1.53771	0.0289928	-1.10303	A0A3B5YWS5	Uncharacterized protein		47	6	237	24.9	5.03
2.99981	0.00100044	-1.10326	A0A3B6C0G0	NAD(P)-bd_dom domain-containing protein		48	14	440	48.3	9
1.8212	0.0150937	-1.11115	A0A3B6B6M7	Adenosylhomocysteinase (EC 3.3.1.1)		74	26	481	52.8	5.9
2.17652	0.00666009	-1.11213	A0A3B5Y4Y0	Aldedh domain-containing protein		54	20	551	61.1	7.14
2.67636	0.0021069	-1.12244	A0A3B6CCM3	Peroxidase (EC 1.11.1.7)		25	7	361	37.6	7.61
1.70058	0.0199259	-1.1275	A0A3B6MW71	Protein kinase domain-containing protein		20	4	347	38.1	7.8
2.27221	0.00534304	-1.12753	Q03968	Late embryogenesis abundant protein, group 3 (LEA) (PMA2005)		26	6	224	23.2	8.84
1.65536	0.0221128	-1.1306	A0A1D6BNE7	Proteasome subunit beta (EC 3.4.25.1)		37	4	204	22.8	5.27	metabolic process	cytoplasm;nucleus;proteasome	catalytic activity
1.96853	0.0107515	-1.13223	A0A3B5Z2R8	TRUD domain-containing protein		14	5	701	76.4	6.64
2.45242	0.0035284	-1.13711	A0A3B6A144	Uncharacterized protein		38	3	153	16.7	5.27
2.14449	0.00716985	-1.14526	A0A3B5ZS60	DUF1681 domain-containing protein		39	6	280	30.1	6
2.75258	0.00176775	-1.14804	A0A3B6DPL3	Peroxidase (EC 1.11.1.7)		49	10	341	36	5.91
1.40016	0.0397964	-1.14854	A0A3B6PMW9	PigN domain-containing protein		5	2	973	110.2	7.91
2.00874	0.00980069	-1.14982	A0A3B6ISB7	Uncharacterized protein		79	21	368	41.5	6.19
1.6119	0.0244398	-1.1747	A0A3B6IQ99	Uncharacterized protein		11	3	450	50.5	5.81
1.96938	0.0107305	-1.17758	A0A3B6PQ29	Uncharacterized protein		10	2	275	28.2	10.13
2.91728	0.00120983	-1.18057	A0A3B6S9B7	Dirigent protein		15	2	192	21.2	6.62
1.62914	0.0234888	-1.18087	A0A3B6GZ62	AA_TRNA_LIGASE_II domain-containing protein		51	19	505	57.4	6.48
2.32502	0.00473135	-1.18259	A0A3B6RP11	S5 DRBM domain-containing protein		11	3	523	59	6.24
1.38824	0.0409037	-1.18427	A0A3B6EHK6	Uncharacterized protein		54	5	176	19.3	5.1
1.5697	0.0269339	-1.18608	A0A3B6EA16	Uncharacterized protein		23	2	172	18.8	5.63
2.32407	0.00474166	-1.18683	A0A3B6EIN4	ATP synthase subunit beta (EC 7.1.2.2)		70	25	551	58.9	6.24
1.86692	0.0135855	-1.18708	A0A3B6I2X4	Uncharacterized protein		2	2	1291	147.2	5.83
1.54359	0.0286028	-1.18895	A0A3B5XVX7	Tubulin gamma chain		12	3	469	52.7	6.06
2.27911	0.00525885	-1.1983	A0A3B6EBN5	BOWMAN_BIRK domain-containing protein		10	2	217	23.3	6.62
1.93676	0.0115676	-1.20372	A0A3B6GWS9	Malate dehydrogenase (EC 1.1.1.37)		58	10	340	35.4	8.37
3.29761	0.000503948	-1.20425	A0A3B6SKU1	Fe2OG dioxygenase domain-containing protein		30	6	318	35.3	5.44
1.32935	0.0468435	-1.2067	A0A3B5Y1V2	Peptidase A1 domain-containing protein		9	3	435	44.7	8.84
1.85636	0.0139202	-1.22334	A0A3B6IPV2	Importin N-terminal domain-containing protein		20	12	1096	120.9	4.68
1.68495	0.0206562	-1.24827	Q9XEN5	Beta-1,3-glucanase	Glb3	16	3	334	34.9	6.04	metabolic process		catalytic activity
1.49429	0.0320412	-1.26415	A0A3B6KR08	AAA domain-containing protein		14	3	354	40.6	9.17
1.96734	0.010781	-1.26943	A0A3B6TBM9	Uncharacterized protein		5	2	820	88.9	5.05
1.75621	0.0175301	-1.27385	A0A3B6QKH8	S-(hydroxymethyl)glutathione dehydrogenase (EC 1.1.1.284)		49	11	381	40.6	6.81
2.59004	0.00257015	-1.27589	D9ZLW0	Outer membrane channel protein OEP16-2	OEP16-2	16	2	173	17.9	7.27		membrane
1.47083	0.03382	-1.27629	A0A3B6JRT7	Uncharacterized protein		4	2	847	95.4	9.13
1.93658	0.0115724	-1.27722	A0A0E3IDK3	Phosphate transporter protein	PHT1.4-D1	19	8	537	58.5	7.49	transport	membrane	transporter activity
1.42467	0.0376127	-1.28833	A0A3B6SGP9	Uncharacterized protein		17	4	435	45.9	6.92
1.35237	0.0444255	-1.29023	A0A140CQF9	SNARE (SNARE protein)		25	2	121	13.7	6.33		membrane	protein binding
1.6558	0.0220903	-1.29273	A0A3B6AZ19	PCI domain-containing protein		55	16	425	47.3	5.83
2.60973	0.00245621	-1.30557	A0A3B6JLT1	Uncharacterized protein		22	3	204	22.2	8.78
1.44326	0.0360361	-1.31345	A0A3B5Y6G2	PHB domain-containing protein		49	8	288	31.8	9.67
2.30198	0.00498911	-1.31483	A0A341Z185	HMA domain-containing protein		35	2	77	8.2	6.6
1.38016	0.0416715	-1.3168	W5CAC3	UBIQUITIN_CONJUGAT_2 domain-containing protein	TRAES_3BF050900020CFD_c1 TRAES_3BF051000010CFD_c1	42	5	153	17.2	7.34			nucleotide binding
1.49432	0.0320392	-1.32181	A0A3B6EC02	FRIGIDA-like protein		12	4	654	71	4.74
1.66537	0.0216088	-1.32352	A0A3B6FKI0	Uncharacterized protein		11	2	414	44.6	6.33
1.46937	0.0339338	-1.33992	A0A3B6KGR7	Uncharacterized protein		26	6	391	41.4	4.42
1.8053	0.0156568	-1.34352	A0A3B6LSA9	Protein kinase domain-containing protein		14	7	770	85.4	7.93
2.85226	0.00140522	-1.34603	A0A3B6JLN2	Uncharacterized protein		15	3	387	42.6	5.16
1.4927	0.0321587	-1.34994	A0A3B6T7J7	Uncharacterized protein		56	6	169	18.6	4.56
2.24502	0.00568824	-1.37127	A0A3B5Z2Q5	Uncharacterized protein		41	6	179	18.5	8.68
1.40728	0.0391488	-1.37617	A0A3B6ELF4	Uncharacterized protein		45	3	97	10	5.76
2.04867	0.00893991	-1.38662	A0A3B6MN50	Uncharacterized protein		10	3	400	44.7	8.22
1.71892	0.0191019	-1.3962	A0A3B6N2V3	RING-type domain-containing protein		5	5	1919	214.7	5.94
3.0687	0.000853696	-1.39871	A0A3B6KL62	X8 domain-containing protein		18	4	492	52.6	6.24
2.83582	0.00145941	-1.40362	A0A3B6ES95	Uncharacterized protein		39	7	331	34.7	6.35
3.19737	0.000634789	-1.4042	A0A3B5ZVE9	Uncharacterized protein		73	11	213	22.8	5.06
1.62309	0.0238184	-1.42053	A0A3B6TDT0	Uncharacterized protein		12	3	565	60.1	8.54
1.59551	0.0253796	-1.42158	A0A3B6FKL0	PNP_UDP_1 domain-containing protein		34	5	361	39.3	5.72
1.83714	0.01455	-1.42924	Q2TN84	USP family protein		77	7	166	17.9	6.19	response to stimulus
1.41468	0.0384879	-1.43404	A0A3B6C2B3	AAI domain-containing protein		21	2	178	17	8.48
2.61511	0.00242601	-1.44492	A0A077S3V2	Aspartate aminotransferase (EC 2.6.1.1)	TRAES_3BF023000050CFD_c1	66	22	454	49.5	8.22	metabolic process		catalytic activity
1.67308	0.0212285	-1.4488	A0A3B6PMK1	Uncharacterized protein		12	5	688	70.4	5.74
2.135	0.00732826	-1.45148	A0A3B6H114	CTLH domain-containing protein		8	2	386	43.6	6.15
2.03439	0.00923863	-1.46192	A0A3B6A2G0	DYW_deaminase domain-containing protein		8	3	611	68.1	8.56
1.34989	0.0446795	-1.46361	A0A3B6B6I4	WD_REPEATS_REGION domain-containing protein		60	12	317	33.9	5.62
1.37879	0.0418029	-1.46754	A0A3B6ASD2	Uncharacterized protein		34	20	922	105.4	6.61
3.97606	0.000105668	-1.47768	A0A3B5ZQT0	Cellulase domain-containing protein		24	9	632	69.4	5.45
1.58519	0.0259904	-1.48287	A0A3B6C6D2	Importin N-terminal domain-containing protein		34	22	1044	120.1	4.91
2.85766	0.00138783	-1.48602	A0A3B6GZV2	Uncharacterized protein		7	2	433	48.7	8.98
1.69423	0.0202196	-1.48758	Q8GV49	LEA1 protein	LEA1	34	6	224	23.2	8.84
2.46675	0.00341391	-1.48929	A0A3B6KQK1	Dihydrolipoamide acetyltransferase component of pyruvate dehydrogenase complex (EC 2.3.1.-)		42	14	474	48.7	9.03
2.01581	0.00964245	-1.49563	A0A3B6H7J2	Uncharacterized protein		18	2	164	19.1	6.34
2.08288	0.00826272	-1.51033	A0A3B6MUC8	SAM_MT_RSMB_NOP domain-containing protein		26	15	873	97.4	5.67
2.0203	0.00954328	-1.51868	A0A3B6RBL2	Uncharacterized protein		19	2	236	25.7	9.11
1.49822	0.0317529	-1.53093	A0A3B6QGW2	Cytosolic Fe-S cluster assembly factor NBP35	NBP35	34	7	348	37.1	5.14
1.33199	0.0465592	-1.54166	A0A3B6N330	Uncharacterized protein		7	4	885	98	7.23
2.44624	0.003579	-1.55152	A0A3B6CHB9	Peroxidase (EC 1.11.1.7)		48	10	346	36.6	5.87
1.7005	0.0199297	-1.55757	A0A3B6D3K3	Aldo_ket_red domain-containing protein		28	4	317	34.3	6.35
1.44934	0.0355351	-1.56048	A0A3B6MVY2	RING-type domain-containing protein		11	2	340	36.4	4.09
1.89284	0.0127986	-1.57681	O64394	Thioredoxin H-type (Trx-H) (TrxTa)		44	4	127	13.5	5.22	cellular homeostasis;metabolic process;regulation of biological process;transport	cytoplasm	antioxidant activity;catalytic activity
1.78134	0.0165446	-1.58626	A0A7H4LFQ6			51	4	134	13.9	10.23
1.31833	0.0480475	-1.59528	A0A3B6HRB1	Uncharacterized protein		7	2	385	42.7	6.93
2.0457	0.00900118	-1.59835	A0A3B6TQ81	CRAL-TRIO domain-containing protein		26	10	572	62.2	5.16
1.57928	0.0263463	-1.5994	A0A3B6LWB2	FYVE-type domain-containing protein		5	3	1088	119.2	5.72
1.65296	0.0222353	-1.62037	A0A3B6KQK9	Uncharacterized protein		14	7	913	101.9	6.4
1.91703	0.012105	-1.62135	A0A3B6GVH3	Peroxiredoxin (EC 1.11.1.15)		85	9	162	17.3	5.31
2.25176	0.00560069	-1.63344	W5CY88	Peroxiredoxin (EC 1.11.1.15)	TRAES_3BF073600030CFD_c1	85	9	162	17.3	5.31	cellular homeostasis;metabolic process;regulation of biological process		antioxidant activity;catalytic activity
1.92496	0.0118862	-1.64	A0A341WZG6	Small nuclear ribonucleoprotein Sm D1 (snRNP core protein D1)		31	2	107	11.8	11.02
1.64749	0.022517	-1.6906	A0A3B6SN06	Uncharacterized protein		46	28	891	101.1	5.97
2.64175	0.00228166	-1.70508	A9UIE5	Protease inhibitor-like protein		27	2	131	13.4	8.51	metabolic process		catalytic activity
1.38931	0.0408032	-1.70888	A0A3B6HR26	Uncharacterized protein		12	3	351	37.3	6.95
1.30577	0.0494578	-1.72072	A0A3B6C8B8	ATP-dependent 6-phosphofructokinase (ATP-PFK) (Phosphofructokinase) (EC 2.7.1.11) (Phosphohexokinase)	PFK	10	3	469	50.8	6.43
3.13231	0.00073737	-1.72192	A0A3B6LII4	Uncharacterized protein		33	3	153	16	4.88
3.81556	0.000152913	-1.7234	A0A3B5ZN33	Phospholipase D (EC 3.1.4.4)		19	8	827	91.9	6.46
1.31854	0.0480246	-1.72566	A0A3B6JD31	Uncharacterized protein		10	3	450	46.6	6.11
1.85004	0.0141242	-1.73679	A0A3B6RC34	Glycosyltransferase (EC 2.4.1.-)		9	3	476	50.5	5.69
1.41173	0.03875	-1.74457	A0A3B6T878	Uncharacterized protein		25	3	229	24.6	5.11
1.30803	0.049201	-1.76754	A0A3B6NP49	Uncharacterized protein		6	2	744	82	6.19
1.39071	0.0406719	-1.78646	A0A3B5YXN9	Uncharacterized protein		23	3	332	34.7	6.18
1.44117	0.0362101	-1.7881	A0A3B6TPH5	Uncharacterized protein		53	20	537	58.4	6.3
2.31949	0.00479193	-1.81404	A0A3B5ZYT4	Uncharacterized protein		3	2	918	101	6.24
1.63431	0.0232108	-1.81783	A0A3B6FHZ6	BOWMAN_BIRK domain-containing protein		16	2	219	23.7	5.57
1.88971	0.0128911	-1.81939	A0A077RU67	Uncharacterized protein	TRAES_3BF168400010CFD_c1	29	3	182	19.4	7.66	regulation of biological process	extracellular	enzyme regulator activity
2.37408	0.00422592	-1.82696	W5I6L2	HVA22-like protein		11	2	194	22.6	8.63		membrane
4.52235	3.00364e-05	-1.83137	A0A3B6LGJ2	SAP domain-containing protein		6	2	626	70.1	5.68
2.05419	0.00882698	-1.85781	A0A3B6LMS6	Gamma-tubulin complex component		6	2	825	92.1	7.01
2.25034	0.00561897	-1.86247	A0A3B6JIQ3	VOC domain-containing protein		46	4	138	15.3	6.32
1.46606	0.0341932	-1.92742	W5D4D4	Uncharacterized protein	TRAES_3BF156900020CFD_c1	22	8	579	62.9	5.81	transport	membrane	metal ion binding
2.63559	0.00231425	-1.96164	A0A3B6LDG2	Malate dehydrogenase (EC 1.1.1.37)		54	10	358	37.2	8.16
2.32176	0.00476695	-1.97138	A0A3B6RGH8	Acylphosphatase (EC 3.6.1.7)		45	2	110	11.5	8.68
1.857	0.0138994	-1.97858	A0A3B6JMI6	V-type proton ATPase subunit a		36	19	821	93	6.05
1.60483	0.0248411	-1.9968	A0A3B5YX83	Lactamase_B domain-containing protein		10	3	331	37.1	6.02
1.86359	0.0136902	-1.99896	A0A0F7G9F3	WSI18 protein		23	3	225	22.7	7.18
1.83631	0.0145776	-2.02169	A0A3B6SIU4	AAA domain-containing protein		5	2	673	71.8	5.94
2.27067	0.00536208	-2.03848	A0A7H4LAX5			6	2	467	49.9	6.54
1.90292	0.0125048	-2.04338	L7RYK4	Farnesyl pyrophosphate synthase (Farnesyl pyrophosphate synthase A1) (EC 2.5.1.10)		17	4	354	40.5	5.11	metabolic process		catalytic activity
1.33852	0.0458644	-2.04885	A0A3B6SKB0	Epimerase domain-containing protein		27	5	322	34.9	8.18
2.08848	0.00815686	-2.09632	A0A3B6TGG7	Uncharacterized protein		3	2	988	111.9	6.6
1.54698	0.0283806	-2.09826	A0A3B5ZS37	Glutamine amidotransferase type-1 domain-containing protein		15	15	1421	155.5	5.39
3.4541	0.000351479	-2.09896	A0A3B6I134	Protein HIRA		4	2	997	109.1	7.36
2.8126	0.00153957	-2.14335	A0A3B6RAF6	Limit dextrinase type starch debranching enzyme		8	4	962	105.9	5.91
2.28577	0.00517882	-2.16745	A0A3B6PMV4	Uncharacterized protein		25	7	462	50.4	6.95
2.4911	0.00322777	-2.17572	P69661	30S ribosomal protein S15, chloroplastic	rps15-A;rps15-B	20	2	90	10.8	11.22	metabolic process	ribosome	structural molecule activity
1.30862	0.049134	-2.18535	A0A3B5XW19	Uncharacterized protein		17	4	341	36.9	6.74
1.50808	0.0310402	-2.18928	A0A3B6SKP8	Glucose-6-phosphate 1-epimerase (EC 5.1.3.15)		21	3	322	35.8	6.74
1.62426	0.023754	-2.19569	A0A3B5ZRC9	Uncharacterized protein		16	5	435	47	5.68
1.35339	0.0443206	-2.19579	A0A3B6ESU4	Uncharacterized protein		10	4	550	58.8	7.62
1.32835	0.0469516	-2.22046	A0A3B6D949	Peroxidase (EC 1.11.1.7)		6	2	428	45.3	8
1.93798	0.011535	-2.23427	A4K4Z0	Tubulin alpha chain	TUBA-5D TUBA-5B	32	10	449	49.9	5.2	cell organization and biogenesis	cytosol;membrane	catalytic activity;nucleotide binding;structural molecule activity
1.64286	0.0227584	-2.24748	A0A3B6H355	Peptidase A1 domain-containing protein		12	3	416	43.7	9.2
2.71072	0.00194663	-2.26087	A0A3B6SQI7	Uncharacterized protein		16	2	338	38.7	6.73
3.7986	0.000159002	-2.28914	A0A3B6KAJ8	RRM domain-containing protein		63	5	170	16.7	5.25
2.29797	0.00503534	-2.29896	A0A3B6INN4	Zeta_toxin domain-containing protein		16	5	566	62.5	7.55
3.19915	0.000632186	-2.30669	A0A077RZ03	Uncharacterized protein	TRAES_3BF118100070CFD_c1	16	5	415	44.9	8.05			RNA binding
2.69154	0.00203449	-2.32189	A0A077RR33	Uncharacterized protein	TRAES_3BF156800010CFD_c1	12	2	284	31.8	6.61
1.61389	0.0243284	-2.32664	A0A3B6SA74	C2 domain-containing protein		42	48	1975	210.4	5.38
2.34149	0.00455521	-2.32803	A0A3B6T9J5	Uncharacterized protein		41	8	262	28.3	6.44
1.38079	0.041611	-2.33876	A0A3B6GX20	Cysteine proteinase inhibitor		47	5	142	15.7	6.58
2.15947	0.00692683	-2.38849	A0A3B6SU32	PH domain-containing protein		10	3	375	41.3	4.51
1.48169	0.0329842	-2.41837	A0A3B5Y028	Uncharacterized protein		9	2	301	32.4	6.04
1.99353	0.01015	-2.43357	A0A3B6TKQ8	PCI domain-containing protein		39	9	425	47.4	6.38
1.61964	0.024008	-2.49304	A0A3B6MQV3	Uncharacterized protein		22	6	431	47	6.54
1.40588	0.0392752	-2.50705	A0A3B6KNI0	Phospholipase D (EC 3.1.4.4)		11	7	860	96.9	7.34
1.57127	0.026837	-2.50757	A0A077S7C3	Peroxidase (EC 1.11.1.7)	TRAES_3BF072300070CFD_c1	5	2	369	39.4	6.68	metabolic process;response to stimulus	extracellular	antioxidant activity;catalytic activity;metal ion binding
1.60557	0.024799	-2.53267	A0A3B6LG23	Peroxidase (EC 1.11.1.7)		9	2	340	36.9	6.27
1.797	0.0159587	-2.56259	A0A3B6RPD9	Uncharacterized protein		5	2	464	51.3	7.17
1.47571	0.0334417	-2.58502	A0A3B6REZ0	NTF2 domain-containing protein		63	5	122	13.2	6.35
3.76967	0.000169955	-2.62364	A0A3B6FQD3	Uncharacterized protein		15	2	250	28	6.8
1.86062	0.013784	-2.62673	A0A3B6MZ83	Inosine-5'-monophosphate dehydrogenase (IMP dehydrogenase) (IMPD) (IMPDH) (EC 1.1.1.205)		43	9	497	52.1	6.06
1.91614	0.01213	-2.68555	A0A3B6TIJ4	Uncharacterized protein		25	8	534	59.5	8.85
3.45999	0.000346741	-2.70679	A0A3B6NSQ9	Uncharacterized protein		29	2	187	20.3	6.49
1.59854	0.0252033	-2.7342	A0A3B6G2U7	Uncharacterized protein		7	2	584	64.5	5.21
1.65849	0.021954	-2.80045	A0A7H4LNW4			77	15	310	34.7	6.6
1.87815	0.0132389	-2.80329	A0A3B6U5E2	Uncharacterized protein		37	7	218	23.5	5.14
1.63956	0.0229319	-2.80501	A0A3B6JD74	Uncharacterized protein		30	2	96	10.6	5.85
2.41962	0.00380521	-2.80703	A0A3B6NLP2	VID27 domain-containing protein		23	8	652	71	6.43
4.50547	3.12272e-05	-2.81145	A0A3B6NIJ7	Protein disulfide-isomerase (EC 5.3.4.1)		34	14	582	63.5	4.73
1.53499	0.029175	-2.81429	W5B1P6	PPM-type phosphatase domain-containing protein		57	12	290	31.8	6.48	metabolic process		catalytic activity
3.15846	0.000694293	-2.84121	A0A077RZ60	Uncharacterized protein	TRAES_3BF003800030CFD_c1 TRAES_3BF006100020CFD_c1	4	2	704	79.9	5.16	regulation of biological process
2.61303	0.00243762	-2.84911	A0A3B6HX88	Uncharacterized protein		60	4	95	11.1	6.55
2.08811	0.00816368	-2.88894	A0A3B6THM5	Aconitate hydratase (Aconitase) (EC 4.2.1.3)		4	2	688	75.7	6.62
1.69986	0.0199591	-2.90972	A0A3B6DPI7	Uncharacterized protein		27	5	292	32.2	6.28
1.34063	0.0456421	-2.96798	W5FJT8	Tubulin beta chain		69	24	445	49.9	4.87	cell organization and biogenesis	cytoplasm;cytoskeleton	catalytic activity;nucleotide binding;structural molecule activity
1.83809	0.014518	-3.06073	A0A077RYV4	Uncharacterized protein	TRAES_3BF068900080CFD_c1	9	2	401	45.8	8.28		membrane
2.01408	0.00968104	-3.06623	A0A3B6SDN7	Proteasome subunit alpha type (EC 3.4.25.1)		47	7	250	26.9	6.79
4.34366	4.53251e-05	-3.06946	A0A0C4BKB7	Glycine cleavage system H protein		15	3	158	17	4.83	metabolic process	mitochondrion
2.46936	0.00339345	-3.06972	A0A3B6B1I8	Isocitrate dehydrogenase [NADP] (EC 1.1.1.42)		31	12	476	53.4	7.72
2.90975	0.00123098	-3.08195	A0A3B6BZF0	Uncharacterized protein		4	3	1263	137.2	5.39
1.33314	0.0464368	-3.08889	A0A3B5ZYX1	Aldo_ket_red domain-containing protein		34	9	320	35.9	6.95
1.84955	0.0141401	-3.10212	A0A3B6C3H9	Phytocyanin domain-containing protein		15	2	188	18.8	9.5
1.37413	0.0422541	-3.13409	A0A3B6AUB3	GRAM domain-containing protein		24	4	235	25.2	6.54
4.01497	9.66129e-05	-3.31786	A0A3B6EQZ5	DNA polymerase (EC 2.7.7.7)		5	4	1539	170.3	6.89
1.91146	0.0122613	-3.3362	A0A3B6RQ45	DNA polymerase alpha subunit B		14	5	621	69.1	5.34
2.22392	0.00597145	-3.355	A0A3B6TG72	CS domain-containing protein		47	10	318	35.3	5.82
2.32686	0.00471128	-3.44729	A0A3B6SKK1	Uncharacterized protein		48	22	718	78.8	5.36
2.14024	0.00724032	-3.46219	A0A3B6QHA9	Cupin_5 domain-containing protein		46	5	194	21.5	5.5
1.58313	0.0261136	-3.5185	A0A3B6EN66	Uncharacterized protein		72	18	358	40.8	6.2
2.74988	0.00177877	-3.61972	A0A3B6QBY7	Uncharacterized protein		23	3	238	26.6	5.71
4.01579	9.64293e-05	-3.62031	A0A3B6FQ67	HTH arsR-type domain-containing protein		3	4	2682	302.8	7.99
3.01438	0.000967428	-3.62076	A0A3B6SMV6	Uncharacterized protein		36	6	197	21.4	6.54
1.63078	0.0234005	-3.70668	A0A3B5Z3Q3	Uncharacterized protein		45	20	609	68.6	7.85
2.49968	0.00316461	-3.93069	A0A3B6FTX6	Uncharacterized protein		10	5	979	109.5	6.54
1.77448	0.0168081	-3.99131	A0A3B6QF30	tRNA (guanine(37)-N1)-methyltransferase (EC 2.1.1.228) (M1G-methyltransferase) (tRNA [GM37] methyltransferase) (tRNA methyltransferase 5 homolog)		7	2	484	54.9	6.15
3.97459	0.000106026	-4.16741	A0A3B6AXX8	Helicase ATP-binding domain-containing protein		15	13	1256	136.5	6.98
5.4659	3.42058e-06	-4.31361	A0A3B5Y2W2	V-type proton ATPase subunit C		5	2	378	42.2	5.41
4.03616	9.20104e-05	-4.38987	A0A3B6DIH9	Uncharacterized protein		20	2	171	17.3	9.99
4.19305	6.41143e-05	-4.55864	A0A3B5Z2G6	Uncharacterized protein		32	7	314	33.4	5.31
3.5178	0.000303529	-5.33316	A0A3B6SM44	Uncharacterized protein		16	9	823	90.3	5.21
3.15423	0.00070109	-5.43895	A0A3B6JLF7	Uncharacterized protein		9	2	453	45.6	8.66

## Sheet: Table S4
Table S4: List of significantly changed proteins in unirradiated wheat roots between flooding and non-flooding.
#NAME?	p-value	Difference	Accession	Protein names	Gene names	Coverage in Percent	Number of Peptides	Number of AAs	MW in kDa	calc pI	Biological Process	Cellular Component	Molecular Function
3.97563	0.000105771	7.68055	A9U8G0	Alcohol dehydrogenase ADH2A		62	15	379	40.9	6.2	metabolic process		catalytic activity;metal ion binding
3.35578	0.000440776	6.77785	E0WC53	WALI7	wali7 CAMPLR22A2D_LOCUS1126	67	10	264	28.1	7.39
4.2172	6.06451e-05	6.25076	A0A3B6LLS8	Uncharacterized protein		42	10	379	40.9	6.24
4.95006	1.12187e-05	6.24201	A0A3B6TM98	Acyl carrier protein		21	2	132	14.2	5.72
3.84077	0.000144288	6.14016	A0A3B6EPI2	Peptidase A1 domain-containing protein		26	7	449	48.1	8.18
3.30711	0.000493045	6.11545	A0A3B6JHW0	Uncharacterized protein		59	8	293	31.1	6.51
3.2994	0.000501879	5.96234	A0A3B6LH00	Cellulase domain-containing protein		34	10	504	55.9	6.67
3.82005	0.000151337	5.90119	A0A3B5YT45	Uncharacterized protein		12	5	681	74.7	6.32
3.19897	0.00063246	5.88473	A0A3B6THM5	Aconitate hydratase (Aconitase) (EC 4.2.1.3)		4	2	688	75.7	6.62
2.70668	0.00196479	5.78145	W5CY88	Peroxiredoxin (EC 1.11.1.15)	TRAES_3BF073600030CFD_c1	85	9	162	17.3	5.31	cellular homeostasis;metabolic process;regulation of biological process		antioxidant activity;catalytic activity
2.43166	0.00370118	5.71242	A0A3B6MSL2	Fe2OG dioxygenase domain-containing protein		9	3	319	35.9	5.33
3.84525	0.000142807	5.61485	A0A3B6KGC2	PKS_ER domain-containing protein		44	10	368	39.7	6.02
4.51666	3.04327e-05	5.61253	A0A3B6JLF7	Uncharacterized protein		9	2	453	45.6	8.66
2.74971	0.00177947	5.55013	A0A3B6DL48	Usp domain-containing protein		42	3	140	15.2	5.47
4.81622	1.52679e-05	5.52222	B5QT66	Sterol C-14 reductase	fackela	14	2	372	41.8	9.06	metabolic process	membrane	catalytic activity
2.4098	0.00389228	5.5204	A0A3B5Z2Q5	Uncharacterized protein		41	6	179	18.5	8.68
6.26946	5.37705e-07	5.4567	A0A3B5Z2Z0	Uncharacterized protein		52	14	379	41.1	6.73
4.00152	9.96498e-05	5.40772	W5FJT8	Tubulin beta chain		69	24	445	49.9	4.87	cell organization and biogenesis	cytoplasm;cytoskeleton	catalytic activity;nucleotide binding;structural molecule activity
2.80558	0.00156466	5.40595	A0A3B6GP29	Uncharacterized protein		19	6	496	54.4	6.79
1.84322	0.0143476	5.39118	A0A3B6JJ96	Uncharacterized protein		79	21	368	41.4	6.19
3.50561	0.000312171	5.3899	W5C732	Uncharacterized protein	CAMPLR22A2D_LOCUS1654	35	2	100	9.8	9.63
2.18607	0.00651531	5.37436	A0A3B6TUS3	Uncharacterized protein		24	2	249	26.7	4.68
2.96583	0.00108187	5.35693	A0A3B6JGH7	Uncharacterized protein		20	2	430	41.2	9.06
2.13897	0.00726151	5.29522	A0A3B5Y1V2	Peptidase A1 domain-containing protein		9	3	435	44.7	8.84
4.12251	7.54201e-05	5.28821	A0A3B6GX20	Cysteine proteinase inhibitor		47	5	142	15.7	6.58
3.81876	0.000151788	5.27749	A0A3B6HX88	Uncharacterized protein		60	4	95	11.1	6.55
5.53816	2.89628e-06	5.26259	A0A3B6HUF8	Dirigent protein		14	2	181	18.7	8.09
7.38448	4.12587e-08	5.2319	A0A3B6JHY8	Usp domain-containing protein		28	4	171	18.3	5.92
3.48555	0.000326928	5.14181	Q8GV49	LEA1 protein	LEA1	34	6	224	23.2	8.84
6.25637	5.54153e-07	5.08704	Q5TMB2	Xylanase inhibitor TAXI-IV	Taxi-IV	62	14	408	42	8.32	metabolic process		catalytic activity
2.55942	0.0027579	5.0819	W5E6W1	Uncharacterized protein		55	6	140	15	10.48	metabolic process	ribosome	structural molecule activity
3.14668	0.000713386	5.06133	A0A3B6HW41	Uncharacterized protein		23	3	455	43.7	8.88
3.92464	0.000118947	5.05509	A0A3B6UCP5	SCP domain-containing protein		61	5	168	17.9	4.61
1.98712	0.0103011	5.04657	A0A3B5XWL2	PPR_long domain-containing protein		40	13	454	50.8	6.99
3.05978	0.000871395	5.03021	A0A3B6HV35	Usp domain-containing protein		28	4	169	18	6.32
3.04992	0.000891418	5.01021	A0A3B6IQY9	Uncharacterized protein		62	15	379	40.9	6.28
3.93084	0.000117264	4.98481	A0A3B6TKQ8	PCI domain-containing protein		39	9	425	47.4	6.38
4.56672	2.71192e-05	4.95736	A9U8G1	Alcohol dehydrogenase ADH2D		71	16	379	41	6.4	metabolic process		catalytic activity;metal ion binding
2.71745	0.00191667	4.94061	A0A3B6DFK7	Histone H3		29	2	133	15.1	11.14
2.87262	0.00134085	4.90344	A0A3B6ATG5	Uncharacterized protein		37	5	337	35.8	7.02
2.42516	0.00375701	4.83236	A0A3B6C6Q5	Uncharacterized protein		27	2	119	12.1	10.39
3.3077	0.000492379	4.77928	A0A3B6EMP8	Uncharacterized protein		25	2	151	16.5	5.21
2.1233	0.00752837	4.77924	A0A3B6EN66	Uncharacterized protein		72	18	358	40.8	6.2
3.35214	0.000444483	4.67511	A0A3B6MKI7	Pyrophosphate--fructose 6-phosphate 1-phosphotransferase subunit alpha		47	13	450	49	6.52
1.89887	0.012622	4.6518	A0A3B6FPM4	Ubiquitin carboxyl-terminal hydrolase (EC 3.4.19.12)		32	11	450	50.5	6.05
5.52596	2.97882e-06	4.61357	Q03968	Late embryogenesis abundant protein, group 3 (LEA) (PMA2005)		26	6	224	23.2	8.84
2.57592	0.00265509	4.59841	A7BJ78	Xylanase inhibitor	Xip-R2	29	7	297	32.8	8.47	metabolic process		catalytic activity
1.76826	0.0170506	4.55767	Q84QI5	GSP-1 Grain Softness Protein (Grain softness protein-1)	Gsp-1 gsp-1	28	4	164	18.2	7.99	regulation of biological process		enzyme regulator activity
4.29195	5.10563e-05	4.55705	D9ZLW0	Outer membrane channel protein OEP16-2	OEP16-2	16	2	173	17.9	7.27		membrane
4.01406	9.68143e-05	4.55644	A0A3B6TYV4	DUF3700 domain-containing protein		67	10	264	28	7.39
1.93807	0.0115327	4.53776	A0A3B6CE61	Uncharacterized protein		10	2	320	33.9	8.27
3.60289	0.000249522	4.53664	A0A3B6PLX2	UVR domain-containing protein		39	24	916	101.4	6.16
3.27577	0.000529947	4.48199	W5CXR9	Peptidase A1 domain-containing protein	TRAES_3BF012400010CFD_c1	21	5	449	48.1	8.4	metabolic process		catalytic activity
1.82403	0.0149959	4.46541	A0A3B6DKB4	FabA domain-containing protein		16	3	217	23.6	9.29
2.44176	0.00361608	4.45788	A0A096USR9	RNA helicase	DEAD1-B	41	19	634	67	7.83			nucleotide binding
3.04094	0.000910045	4.45512	D0PRB4	Peroxiredoxin	CAMPLR22A2D_LOCUS5300	57	9	218	24	6.79	cellular homeostasis;metabolic process;regulation of biological process		antioxidant activity;catalytic activity
1.85116	0.0140877	4.39979	A0A3B6B2V5	Glutaredoxin domain-containing protein		50	4	129	13.3	7.85
3.26996	0.000537081	4.39174	F8S6T7	Pathogenesis-related protein 1-7	Pr-1-7	78	5	165	17.8	4.49		extracellular
3.92584	0.00011862	4.36896	A0A3B6MNW7	Uncharacterized protein		62	16	398	40.9	6.68
1.8549	0.0139669	4.35034	A0A3B5YUV2	Uncharacterized protein		57	11	292	30.7	7.59
2.72458	0.00188549	4.34416	P01544	Acidic protein] (Fragment);Alpha-1-purothionin (Purothionin A-II) [Cleaved into: Alpha-1-purothionin	THI1.1 PUR-D1	48	6	126	13.5	4.88	defense response;response to stimulus	extracellular
3.48186	0.000329718	4.32613	A0A3B6CHB9	Peroxidase (EC 1.11.1.7)		48	10	346	36.6	5.87
3.50427	0.00031313	4.3127	A0A3B6H360	WPP domain-containing protein		59	22	554	59.9	4.64
3.93924	0.000115017	4.30633	A0A3B6TPG7	Uncharacterized protein		73	10	247	27.1	5.17
3.59164	0.00025607	4.27569	A0A3B6NX87	Uncharacterized protein		11	4	648	70.3	6.73
2.23567	0.00581212	4.24676	Q8H0K8	Xylanase inhibitor (Xylanase inhibitor TAXI-I)	xiI taxi-I TRAES_3BF012400030CFD_c1	43	9	402	40.9	7.9	metabolic process		catalytic activity
2.13347	0.00735408	4.23629	A0A077RX59	Translation machinery-associated protein 22	TRAES_3BF278300030CFD_c1	36	4	200	21.3	8.27	metabolic process	cytoplasm;ribosome	RNA binding
2.54518	0.00284982	4.23413	A0A7H4LNW4			77	15	310	34.7	6.6
2.63936	0.00229425	4.21179	A0A3B5XYU4	Uncharacterized protein		31	8	489	53	5.2
2.23152	0.00586791	4.18369	A0A3B6D7A9	Usp domain-containing protein		53	6	180	18.8	6.14
2.40303	0.00395342	4.17891	A0A3B5XVI4	Peroxidase (EC 1.11.1.7)		22	5	338	35.7	8.13
4.64287	2.27579e-05	4.1427	A0A3B6A207	Uncharacterized protein		22	4	336	34.6	8.63
2.41983	0.00380335	4.12477	M5AJV9	Hemoglobin 1	TaBWHb-1	55	8	162	18	8.12	transport	cytosol;membrane	metal ion binding;transporter activity
2.82357	0.00150116	4.11953	A0A1D5UNV1	HP domain-containing protein	CAMPLR22A2D_LOCUS4329 CAMPLR22A2D_LOCUS4346	5	4	939	104.9	6.37	cell organization and biogenesis		protein binding
5.20218	6.27801e-06	4.11182	A0A3B6EM13	Uncharacterized protein		72	12	256	27.3	5.48
5.04491	9.01752e-06	4.10637	A0A3B6TJ86	RRM domain-containing protein		38	6	286	30.9	8.09
1.95033	0.0112116	4.10338	A0A3B6IPV3	ATP-dependent Clp protease proteolytic subunit (EC 3.4.21.92)		15	2	282	30.2	8.29
2.78264	0.00164954	4.08362	A0A3B5Z3R6	Glyco_hydro_18 domain-containing protein		12	2	294	32.6	7.8
3.04022	0.00091154	4.08041	A0A3B6Q9B6	LsmAD domain-containing protein		9	2	588	64.2	6.58
1.99991	0.010002	4.07068	A0A3B5Y566	WD_REPEATS_REGION domain-containing protein		11	2	403	43.9	4.98
1.7938	0.0160767	4.06718	A0A341VIT6	Uncharacterized protein		36	2	121	12.7	6.67
1.83759	0.014535	4.02683	A0A3B6HPZ5	Uncharacterized protein		46	18	657	71.8	5.29
4.02443	9.45301e-05	4.0187	A0A3B6HUT6	Uncharacterized protein		12	3	483	52	7.39
3.00151	0.000996532	4.01578	A0A3B6C6E8	Uncharacterized protein		28	8	425	46.9	5.96
2.86307	0.00137066	4.01129	D8L9M8	RNA recognition domain containing protein,expressed	TAA_ctg0464b.00230.1 TRAES_3BF006700030CFD_c1	35	8	439	48.7	6.9			RNA binding
2.02103	0.00952738	4.01129	A0A3B6NX48	Histone H2A		49	4	140	14.4	10.67
4.76415	1.72129e-05	3.98387	A0A3B6LFH5	Pyrophosphate--fructose 6-phosphate 1-phosphotransferase subunit alpha (PFP) (6-phosphofructokinase, pyrophosphate dependent) (PPi-PFK) (Pyrophosphate-dependent 6-phosphofructose-1-kinase)	PFP-ALPHA	36	14	664	72.5	7.71
1.74532	0.0179755	3.9731	P69661	30S ribosomal protein S15, chloroplastic	rps15-A;rps15-B	20	2	90	10.8	11.22	metabolic process	ribosome	structural molecule activity
2.57148	0.0026824	3.96823	A0A3B6FEF4	Uncharacterized protein		38	10	484	51.4	5.41
1.47009	0.0338774	3.96432	A0A3B6HV11	Uncharacterized protein		35	21	1035	117.8	4.91
1.47746	0.0333077	3.9491	A0A3B6DLW0	Usp domain-containing protein		37	4	164	17.9	7.08
3.4323	0.00036957	3.93133	A0A3B6MYA0	Lysine--tRNA ligase (EC 6.1.1.6) (Lysyl-tRNA synthetase)		38	18	609	68.5	5.82
3.19914	0.000632205	3.91548	A0A3B5ZZB4	NOT2_3_5 domain-containing protein		9	3	559	60	8.46
2.23036	0.00588355	3.90809	A0A3B6RER5	Protein kinase domain-containing protein		16	4	349	37.7	8.87
4.0241	9.4601e-05	3.90267	A0A3B6H0F0	Uncharacterized protein		23	8	382	42.8	6.87
2.86713	0.00135791	3.90054	A0A3B6MII9	Uncharacterized protein		73	23	446	48	5.55
2.04726	0.00896895	3.88526	A0A1D5TPB6	Ribosomal protein L19		26	4	209	24.2	11.44	metabolic process	ribosome	structural molecule activity
4.54787	2.83222e-05	3.88362	A0A3B5ZPT1	Aminotran_1_2 domain-containing protein		65	18	402	43.7	6.55
3.0059	0.000986505	3.8777	A0A3B5Z603	AB hydrolase-1 domain-containing protein		31	5	309	32.8	4.79
4.11624	7.6517e-05	3.87534	A7UME2	Xylanase inhibitor 725ACCN		40	9	403	41.2	7.52	metabolic process		catalytic activity
1.95483	0.0110962	3.87331	A0A3B6KR72	H15 domain-containing protein		20	2	289	29.3	10.76
2.26226	0.00546692	3.87045	A0A3B5ZYX1	Aldo_ket_red domain-containing protein		34	9	320	35.9	6.95
1.40963	0.0389374	3.85461	A0A3B6PM63	PfkB domain-containing protein		77	17	345	37.2	5.16
2.62013	0.00239813	3.8385	Q53IQ2	Xylanase inhibitor	xi-IB	62	14	401	41.2	8.32	metabolic process		catalytic activity
3.70702	0.000196326	3.83835	A0A3B6A144	Uncharacterized protein		38	3	153	16.7	5.27
3.16335	0.000686519	3.82303	A0A3B6ELF4	Uncharacterized protein		45	3	97	10	5.76
3.34138	0.00045564	3.81721	A0A3B6RQ45	DNA polymerase alpha subunit B		14	5	621	69.1	5.34
2.25033	0.00561909	3.81154	A0A3B6LYJ2	Arf-GAP domain-containing protein		17	5	414	45	8.98
3.17921	0.000661903	3.80597	A0A3B6LQ96	Uncharacterized protein		25	4	325	35.3	7.85
2.85604	0.00139301	3.79646	A0A3B6N094	BOWMAN_BIRK domain-containing protein		25	2	130	14.6	8.69
2.93322	0.00116622	3.79458	A0A3B6QH86	Cytochrome b-c1 complex subunit Rieske, mitochondrial (EC 7.1.1.8)		21	5	270	29.6	8.07
1.9614	0.0109296	3.7904	A0A3B6TNV8	Glycosyltransferase (EC 2.4.1.-)		22	7	475	50.6	5.69
4.52896	2.95829e-05	3.79027	Q06I92	Fasciclin-like protein FLA14	TRAES_3BF022100060CFD_c1	8	2	245	25	9.14
2.47895	0.00331929	3.78042	A0A3B5Y2W2	V-type proton ATPase subunit C		5	2	378	42.2	5.41
2.90116	0.00125557	3.77284	A0A3B6REZ0	NTF2 domain-containing protein		63	5	122	13.2	6.35
2.00031	0.00999291	3.75852	A0A3B6NU99	Usp domain-containing protein		72	6	162	17	5.92
3.36378	0.000432734	3.75022	A0A3B5ZQT0	Cellulase domain-containing protein		24	9	632	69.4	5.45
3.10122	0.000792093	3.7353	I3NM40	APHC domain-containing protein	35D7.2	20	3	354	40.8	9.13	defense response;metabolic process;regulation of biological process;response to stimulus	endoplasmic reticulum;Golgi;membrane;nucleus	catalytic activity
1.75143	0.0177245	3.7306	A0A3B6QNR9	Epimerase domain-containing protein		18	4	345	38.1	8.02
1.97414	0.0106136	3.726	A0A3B6CGD7	Anamorsin homolog (Fe-S cluster assembly protein DRE2 homolog)		36	7	360	37.9	7.75
3.98055	0.00010458	3.72569	A0A3B6LU54	Uncharacterized protein		17	3	294	32.4	7.46
1.73917	0.0182318	3.72298	A0A3B6TF93	Uncharacterized protein		12	4	488	52.5	6.34
2.20593	0.00622397	3.71578	A0A3B6RKF2	AAI domain-containing protein		16	2	183	17.9	7.78
2.78216	0.00165136	3.70971	A0A3B6JIQ3	VOC domain-containing protein		46	4	138	15.3	6.32
3.72787	0.000187123	3.70434	A0A3B6DPL3	Peroxidase (EC 1.11.1.7)		49	10	341	36	5.91
2.45958	0.00347069	3.6992	A0A3B6MZE4	Uncharacterized protein		9	2	337	37.1	7.24
2.57193	0.00267961	3.68498	A0A3B6MP76	Uncharacterized protein		55	7	176	20	8.02
2.15435	0.00700882	3.68018	A0A3B6RBL2	Uncharacterized protein		19	2	236	25.7	9.11
2.99955	0.00100104	3.67806	A0A3B6CD87	Uncharacterized protein		31	7	436	47.2	6.15
1.90073	0.012568	3.67781	W5B1P6	PPM-type phosphatase domain-containing protein		57	12	290	31.8	6.48	metabolic process		catalytic activity
2.67283	0.00212409	3.66309	A0A3B6N1A5	Uncharacterized protein		17	3	294	32.5	7.72
2.60879	0.00246157	3.66027	A0A3B6D5E7	Glyco_hydro_18 domain-containing protein		15	4	310	33.7	9.13
2.80623	0.0015623	3.65974	A0A3B6IX48	Uncharacterized protein		18	7	506	55.9	5.36
1.48753	0.0325441	3.65801	A0A3B6B5U1	Uncharacterized protein		10	2	403	42	6.43
4.1938	6.40034e-05	3.65728	A0A3B6J081	PH domain-containing protein		30	7	483	52.4	5.07
4.03445	9.23737e-05	3.65632	A0A3B6RN88	Uncharacterized protein		16	3	204	22.7	8.06
2.69672	0.00201041	3.65009	A0A3B5YXR1	Uncharacterized protein		33	3	114	12.5	5.2
2.35779	0.00438743	3.6492	W5D5N0	Uncharacterized protein	TRAES_3BF010400300CFD_c1 TRAES_3BF010600090CFD_c1	11	2	261	26.2	6.54	metabolic process		catalytic activity
1.90778	0.0123656	3.64627	A0A0F7G9F3	WSI18 protein		23	3	225	22.7	7.18
2.39041	0.00406994	3.63471	A0A3B6JIM4	Uncharacterized protein		9	5	895	97.8	6.54
3.24876	0.000563952	3.6312	A0A7H1K1W9			49	5	164	17.9	7.03
4.02639	9.4104e-05	3.62536	D8L9L4	BolA-like protein domain containing protein,expressed	TAA_ctg0464b.00090.1 TRAES_3BF019000170CFD_c1	45	2	97	10.1	5.78	response to stimulus	cytoplasm;cytosol;nucleus
1.58783	0.0258327	3.62013	A0A7H4LPR6			17	4	509	52.1	6.13
1.41773	0.0382183	3.61103	A0A3B6K9J4	Uncharacterized protein		76	10	235	24.7	6.48
2.82879	0.00148323	3.60985	Q2TN84	USP family protein		77	7	166	17.9	6.19	response to stimulus
5.48663	3.26116e-06	3.6097	A0A3B6KL62	X8 domain-containing protein		18	4	492	52.6	6.24
2.40657	0.0039213	3.60406	A0A3B6RLI7	Uncharacterized protein		54	34	918	104.5	6.29
1.96112	0.0109365	3.56195	A0A3B6GXI9	Uncharacterized protein		30	7	439	48.8	6.87
3.55045	0.000281546	3.55774	A0A3B6LN26	NB-ARC domain-containing protein		2	2	1522	170	5.55
1.4163	0.0383446	3.5549	A0A3B6ARZ3	Usp domain-containing protein		75	7	169	18	7.91
4.07265	8.45955e-05	3.5512	A0A3B6RG95	Uncharacterized protein		35	22	903	98.5	9.14
3.90856	0.000123434	3.54043	A0A3B6KFX3	Uncharacterized protein		30	5	358	37.3	4.83
1.84238	0.0143754	3.53882	A0A3B5Y6G2	PHB domain-containing protein		49	8	288	31.8	9.67
3.18505	0.00065306	3.53643	A0A481S232	Auxin-repressed 12.5 kDa protein (Fragment)		58	3	114	12.3	9.32
3.70046	0.000199314	3.51832	A0A3B6QB19	HECT domain-containing protein		9	9	1841	198.3	5.67
2.83696	0.00145558	3.51405	A0A3B6MS53	AA_TRNA_LIGASE_II domain-containing protein		20	7	498	56.4	6.64
1.56416	0.0272799	3.50902	A0A3B6SA74	C2 domain-containing protein		42	48	1975	210.4	5.38
1.87404	0.0133648	3.50625	A0A3B6PLS2	tRNA_edit domain-containing protein		15	2	233	26	5.17
2.43268	0.00369248	3.50437	A0A3B6RCB7	Uncharacterized protein		5	2	725	80.6	6.3
2.01892	0.00957363	3.49766	A0A3B5Y1Z1	Uncharacterized protein		21	9	454	48.8	8.63
2.2617	0.00547394	3.4922	A0A3B6GPB8	Importin N-terminal domain-containing protein		44	24	981	107.9	5.31
3.21361	0.000611494	3.47952	I3NM30	Putative non-cyanogenic beta-glucosidase	4N5.4	40	13	507	56.4	8.98	metabolic process		catalytic activity;protein binding
2.02551	0.00942944	3.45694	A0A3B6RCI6	Phosphoacetylglucosamine mutase (PAGM) (EC 5.4.2.3) (Acetylglucosamine phosphomutase) (N-acetylglucosamine-phosphate mutase)		15	5	559	59.9	5.86
2.98746	0.00102929	3.45008	A0A3B6QIH5	Uncharacterized protein		5	2	702	77.6	7.08
2.40954	0.00389457	3.44018	A0A3B6HZD9	VOC domain-containing protein		34	3	141	15.1	5.8
2.46915	0.00339504	3.43595	A0A3B6TIJ4	Uncharacterized protein		25	8	534	59.5	8.85
2.64752	0.00225152	3.43404	A0A3B6T7J7	Uncharacterized protein		56	6	169	18.6	4.56
2.41933	0.00380775	3.43275	A0A3B6I3V3	Uncharacterized protein		28	8	510	54.9	7.39
1.65699	0.02203	3.42962	A0A3B6A3B7	Structural maintenance of chromosomes protein		4	3	1168	134.2	7.75
2.7485	0.00178441	3.41594	A0A3B6SDN7	Proteasome subunit alpha type (EC 3.4.25.1)		47	7	250	26.9	6.79
1.46922	0.0339452	3.41493	A0A3B6QHA9	Cupin_5 domain-containing protein		46	5	194	21.5	5.5
2.85731	0.00138897	3.41427	A0A3B6QEN0	Rhodanese domain-containing protein		37	3	133	13.9	8.13
3.52196	0.000300638	3.40683	A0A3B6B801	Uncharacterized protein		28	5	365	40	6.6
3.5791	0.000263575	3.39747	A0A3B6RKQ5	HMA domain-containing protein		38	3	110	11.1	4.81
2.68181	0.0020806	3.39249	A0A3B5Y6T2	Uncharacterized protein		44	3	147	16.1	5.43
3.20263	0.000627147	3.38113	A0A3B6NJ31	Aspartate aminotransferase (EC 2.6.1.1)		53	15	426	47.3	6.99
2.88714	0.00129675	3.37845	A0A3B6D8R8	DUF4057 domain-containing protein		10	2	248	26.2	8.7
4.17848	6.63007e-05	3.35702	A0A3B6EK73	Uncharacterized protein		72	27	557	60.6	5.68
2.08756	0.00817407	3.34482	A0A3B6MZD2	PITH domain-containing protein		30	3	194	21.1	5.24
3.23174	0.000586489	3.34122	A0A1D5US08	Uncharacterized protein	CAMPLR22A2D_LOCUS5863	14	2	322	34.4	4.49		membrane	protein binding
1.60946	0.0245776	3.33843	A0A3B6MTS5	Uncharacterized protein		20	2	138	15.3	5.39
2.70828	0.00195759	3.33734	A0A3B6PKI6	T-complex protein 1 subunit eta (TCP-1-eta) (CCT-eta)		63	28	557	60	6.64
2.29198	0.00510527	3.33276	A0A3B6EC02	FRIGIDA-like protein		12	4	654	71	4.74
4.41682	3.82985e-05	3.31714	A0A3B6MQ77	Glyco_transf_20 domain-containing protein		20	11	894	101.2	5.66
1.68018	0.0208843	3.31138	A0A3B5ZTK0	Ubiquitin-like domain-containing protein		12	3	354	38.2	6.57
1.73104	0.0185761	3.30639	A0A3B6KGC9	Uncharacterized protein		38	2	115	12.1	7.18
3.46674	0.000341397	3.30599	O64394	Thioredoxin H-type (Trx-H) (TrxTa)		44	4	127	13.5	5.22	cellular homeostasis;metabolic process;regulation of biological process;transport	cytoplasm	antioxidant activity;catalytic activity
1.38173	0.0415208	3.27441	A0A3B6S9B7	Dirigent protein		15	2	192	21.2	6.62
1.39642	0.0401404	3.26845	A0A3B6RQL1	Phosphoglycerate kinase (EC 2.7.2.3)		36	12	425	44.9	6.24
3.7954	0.000160176	3.25949	A0A3B6C2R3	Probable 6-phosphogluconolactonase		29	3	175	18.8	4.75
1.86702	0.0135825	3.25737	A0A3B5XZU5	Uncharacterized protein		29	10	603	68.6	6.89
1.94904	0.0112449	3.2503	A0A3B6KQI7	rRNA N-glycosidase (EC 3.2.2.22)		19	4	281	30.3	9.79
2.2889	0.00514165	3.24759	A0A3B6ML47	Cellulase domain-containing protein		29	9	504	56	6.89
2.12971	0.00741802	3.24578	A0A3B6RD26	FHA domain-containing protein		4	2	766	84.6	5.05
4.35822	4.38306e-05	3.24263	A0A3B6B5P1	Uncharacterized protein		71	19	348	38.9	6.64
3.92568	0.000118665	3.23285	A0A3B6SKU1	Fe2OG dioxygenase domain-containing protein		30	6	318	35.3	5.44
3.21123	0.000614856	3.231	A0A3B6QEZ5	Phosphoglycerate kinase (EC 2.7.2.3)		76	22	401	42.1	5.69
1.8233	0.0150209	3.22936	A0A3B6HR26	Uncharacterized protein		12	3	351	37.3	6.95
2.87557	0.00133176	3.22815	A0A3B6CFB6	Uncharacterized protein		31	12	602	65.5	5.25
2.49766	0.00317933	3.22365	A0A3B6FUH6	Rad21_Rec8_N domain-containing protein		2	2	1408	151.7	4.74
3.50848	0.000310114	3.21857	A0A3B6C6D2	Importin N-terminal domain-containing protein		34	22	1044	120.1	4.91
2.01874	0.00957774	3.21707	A0A3B6H1W2	Uncharacterized protein		57	13	376	41.6	5.39
3.39468	0.000403015	3.20172	A0A3B6BXY2	Stress-response A/B barrel domain-containing protein		37	3	111	12.2	5.67
4.84597	1.4257e-05	3.19499	A0A3B6KIB1	Glyco_transf_20 domain-containing protein		19	11	891	100.9	5.52
2.30772	0.00492352	3.19364	P16347	Endogenous alpha-amylase/subtilisin inhibitor (WASI)		32	4	180	19.6	7.21	regulation of biological process		enzyme regulator activity
1.96057	0.0109505	3.18708	Q0H3G8	Flavanone 3-hydroxylase (Fragment)		11	2	318	36.3	5.45	metabolic process		catalytic activity;metal ion binding
1.73582	0.0183732	3.176	A0A3B6RPZ3	Uncharacterized protein		15	5	528	59.9	9.28
3.42555	0.000375359	3.16477	Q1ANA7	Vesicle-associated membrane protein-associated protein		24	3	238	25.7	7.68		membrane
3.35532	0.000441248	3.16131	A0A3B6QC33	T-complex protein 1 subunit eta (TCP-1-eta) (CCT-eta)		63	28	557	60	6.64
1.87146	0.0134445	3.15363	A0A3B6AV72	Uncharacterized protein		41	14	545	61.1	6.55
2.66827	0.00214651	3.1477	A0A3B6TPH5	Uncharacterized protein		53	20	537	58.4	6.3
4.06443	8.6213e-05	3.146	A0A3B6JEI7	UDP-glucose 6-dehydrogenase (EC 1.1.1.22)		68	21	480	52.8	6.13
4.79618	1.5989e-05	3.14343	A0A1D5V145	Ribosomal_L30 domain-containing protein	CAMPLR22A2D_LOCUS563	17	2	116	13	11.44	metabolic process		structural molecule activity
1.72885	0.0186701	3.13793	A0A3B6KPH4	Uncharacterized protein		30	2	143	14.6	8.38
1.38191	0.0415035	3.13642	Q08837	Triticin (Fragment)		17	6	502	56.9	9.29	metabolic process		catalytic activity
4.08903	8.14653e-05	3.11809	A0A3B6QKL4	Epimerase domain-containing protein		56	16	413	44.6	9.35
2.76429	0.00172071	3.11758	A0A3B6RG09	Uncharacterized protein		34	6	374	41	5.02
3.81493	0.000153135	3.11423	A0A3B6C4X9	ATP-synt_DE_N domain-containing protein		30	3	206	21.6	6.7
1.96944	0.010729	3.10875	A0A3B6TG72	CS domain-containing protein		47	10	318	35.3	5.82
3.42735	0.000373809	3.10614	A0A3B6MXV8	ANK_REP_REGION domain-containing protein		32	5	245	25.2	4.89
2.46139	0.00345628	3.09693	A0A3B6AQL4	Eukaryotic translation initiation factor 3 subunit M (eIF3m)		55	15	419	46	5.29
2.30005	0.00501127	3.08796	A0A3B6C3R3	ANK_REP_REGION domain-containing protein		34	2	149	15.4	4.54
1.60876	0.0246174	3.08523	A0A3B6FPZ2	Uncharacterized protein		13	3	218	24.6	7.36
1.30397	0.0496625	3.08206	A0A3B6HU03	Uncharacterized protein		12	2	226	25.1	6.35
1.74108	0.0181518	3.08103	A0A3B6C6A1	Uncharacterized protein		15	2	122	14.2	11.4
2.55838	0.00276455	3.07831	Q53IQ4	Xylanase inhibitor (Fragment)	xi-IIA	39	10	389	40.2	8.07	metabolic process		catalytic activity
2.4903	0.0032337	3.0779	A0A3B6T7X8	Uncharacterized protein		23	4	280	31.9	7.91
1.59907	0.0251727	3.07573	A0A3B6C8U1	UBX domain-containing protein		22	3	283	32.3	5.33
2.26859	0.00538781	3.06766	A0A3B6ILL4	Uncharacterized protein		40	4	183	18.9	9.92
3.31263	0.000486827	3.0649	A0A3B6EKL2	Coatomer subunit delta		10	4	510	56.5	5.85
2.30458	0.00495925	3.06124	A0A3B6LWB2	FYVE-type domain-containing protein		5	3	1088	119.2	5.72
3.09612	0.000801452	3.0533	A0A3B6EJK0	Usp domain-containing protein		57	9	265	27.8	5.19
3.77333	0.000168528	3.04893	A0A077RQG5	Uncharacterized protein	TRAES_3BF099900090CFD_c1	26	7	542	58.7	6.74
2.59475	0.00254245	3.04628	A0A3B6AU36	Probable 6-phosphogluconolactonase		11	2	281	31	4.79
2.92875	0.00117828	3.03515	A0A3B6KPF9	Uncharacterized protein		4	2	654	71.6	8.34
2.26245	0.00546453	3.02569	A0A3B6HT38	Uncharacterized protein		20	9	711	79.7	5.82
4.19296	6.41274e-05	3.00589	A0A3B6RNA7	Uncharacterized protein		28	9	531	59.4	8.84
2.71879	0.00191079	2.9915	A0A3B5YYK8	Uncharacterized protein		17	8	458	49.3	8.56
1.55555	0.0278256	2.98173	A0A3B6DJQ6	Uncharacterized protein		23	4	304	31.4	9.22
2.84964	0.0014137	2.96805	A0A3B6LNW7	BZIP domain-containing protein		14	3	377	41.1	7.25
2.43457	0.00367645	2.96284	A0A3B5ZWB5	Nucleoside diphosphate kinase (EC 2.7.4.6)		71	8	151	16.7	6.8
2.06038	0.008702	2.94579	A0A7H4LRA6			7	3	723	81.3	6.51
2.65968	0.00218937	2.92728	A0A3B6TW73	Glycosyltransferases (EC 2.4.-.-)		11	3	528	58	8.63
2.65165	0.00223022	2.92391	A0A3B6IQ31	Uncharacterized protein		28	7	433	46.2	8.37
2.99621	0.00100876	2.91954	A0A3B6H355	Peptidase A1 domain-containing protein		12	3	416	43.7	9.2
2.54748	0.00283475	2.91443	A0A341WZG6	Small nuclear ribonucleoprotein Sm D1 (snRNP core protein D1)		31	2	107	11.8	11.02
1.99884	0.0100267	2.91114	A0A3B6SS66	Uncharacterized protein		13	2	395	43	5.66
1.39091	0.040653	2.90872	A0A3B6JK33	Uroporphyrinogen decarboxylase (EC 4.1.1.37)		16	2	393	43	7.02
1.72928	0.0186516	2.90088	W5C6Q1	Uncharacterized protein	CAMPLR22A2D_LOCUS1330	40	3	104	12	7.14
3.00617	0.000985884	2.89873	A0A3B6SMF7	Nicalin		32	13	555	60.7	6.77
3.46517	0.000342631	2.89834	A0A3B6TRX8	CS domain-containing protein		27	4	233	24.4	4.42
1.9072	0.0123822	2.89773	A0A3B6SM62	Uncharacterized protein		38	2	93	9.9	10.11
1.82456	0.0149775	2.89114	A0A3B6KT49	Dolichyl-diphosphooligosaccharide--protein glycosyltransferase subunit 1		18	6	605	67.9	7.69
3.22	0.000602566	2.88889	A0A3B6QK40	RRM domain-containing protein		7	2	288	30.7	9.1
2.97387	0.00106202	2.88367	A0A3B6JFX2	Uncharacterized protein		34	22	1154	127.1	5.86
1.68092	0.0208486	2.87884	A0A3B6HZH1	Uncharacterized protein		19	2	155	16.5	6.93
1.58262	0.0261442	2.87442	A0A3B6I4A4	NAD(P)-bd_dom domain-containing protein		37	8	377	41.9	7.4
2.61877	0.00240562	2.86665	A0A3B6CBH0	Protein kinase domain-containing protein		4	2	1021	111.1	7.61
2.80684	0.00156013	2.86221	A4UQN3	MBD2		45	7	313	34.6	5.33		nucleus	DNA binding;metal ion binding
1.80969	0.0154994	2.86156	Q53YX8	Alpha amylase inhibitor protein (Alpha amylase-trypsin inhibitor CM3)	ATI	52	6	168	18.2	7.44	regulation of biological process	extracellular	enzyme regulator activity
4.10486	7.85496e-05	2.86039	A0A3B6TT11	Uncharacterized protein		68	10	148	16.8	5.16
1.88642	0.0129891	2.85807	A0A3B6N3G6	Arf-GAP domain-containing protein		24	6	414	44.9	8.88
4.73611	1.83607e-05	2.84907	A0A3B6KLF4	Uncharacterized protein		5	2	584	63.1	8.88
2.91949	0.00120366	2.84375	W5CT58	Uncharacterized protein	TRAES_3BF046100030CFD_c1	32	3	139	14.9	9.07
4.61348	2.43514e-05	2.84268	A0A3B6EL93	Ribosomal_L28e domain-containing protein		50	6	143	16.2	10.32
2.88273	0.00131001	2.83993	A0A3B6A0Q9	TMF_TATA_bd domain-containing protein		8	6	1037	115.6	4.83
1.77358	0.0168431	2.83559	Q9SAS3	Heat shock protein 90 (Fragment)		49	8	167	19.8	5.24	metabolic process;response to stimulus		nucleotide binding;protein binding
3.69511	0.000201783	2.83284	A0A3B6TLP2	Uncharacterized protein		17	4	435	46	6.44
1.54008	0.028835	2.83189	A0A077S7C3	Peroxidase (EC 1.11.1.7)	TRAES_3BF072300070CFD_c1	5	2	369	39.4	6.68	metabolic process;response to stimulus	extracellular	antioxidant activity;catalytic activity;metal ion binding
3.14452	0.000716934	2.82855	A0A3B6LMN7	PDZ domain-containing protein		41	3	213	23	5.64
2.60571	0.00247906	2.82675	W5CAC3	UBIQUITIN_CONJUGAT_2 domain-containing protein	TRAES_3BF050900020CFD_c1 TRAES_3BF051000010CFD_c1	42	5	153	17.2	7.34			nucleotide binding
1.85345	0.0140136	2.82637	A0A2X0SA24	Uncharacterized protein	CAMPLR22A2D_LOCUS4244	17	4	363	41.1	6.62
1.53174	0.029394	2.8227	A0A3B6N0Y6	BOWMAN_BIRK domain-containing protein		39	3	96	10.5	8.19
3.8763	0.000132953	2.81614	W5DRS3	Glutamate decarboxylase (EC 4.1.1.15)		49	17	495	55.7	5.59	metabolic process		catalytic activity
1.92447	0.0118996	2.81435	A0A3B6DMH7	Uncharacterized protein		35	7	406	41.8	7.71
2.80255	0.0015756	2.81277	A0A3B6C2K9	Exportin-T (Exportin(tRNA)) (tRNA exportin)		13	7	980	107.7	5.96
1.75151	0.0177209	2.81061	Q6QF95	Expansin EXPB10		18	3	271	29.9	8.51	reproduction	extracellular
1.92189	0.0119705	2.8063	A0A3B6RE23	Uncharacterized protein		4	2	856	90.9	6.51
1.91266	0.0122276	2.79954	A0A3B6LJ55	Uncharacterized protein		29	5	220	24.4	4.91
1.9711	0.0106881	2.78628	A0A3B6SU32	PH domain-containing protein		10	3	375	41.3	4.51
2.91098	0.00122751	2.78316	A0A3B6A1T4	Uncharacterized protein		7	3	574	60.6	5.47
1.44524	0.0358721	2.77902	A0A3B6NIQ0	Ubiquitin-like domain-containing protein		9	6	952	98.3	5.05
2.27631	0.00529286	2.77652	A0A3B6BZD8	PEROXIDASE_4 domain-containing protein		82	14	254	27.4	5.35
1.44457	0.0359277	2.77155	D8L9K7	Histone H3	TAA_ctg0464b.00020.1 TRAES_3BF019000110CFD_c1	35	3	136	15.3	11.3		chromosome;nucleus	DNA binding;protein binding
1.89146	0.0128393	2.76097	A0A3B6C8P3	Uncharacterized protein		20	9	543	58.4	8.56
2.03968	0.00912681	2.75473	A0A3B6KQK1	Dihydrolipoamide acetyltransferase component of pyruvate dehydrogenase complex (EC 2.3.1.-)		42	14	474	48.7	9.03
2.71461	0.00192925	2.73324	A0A3B6SG97	Uncharacterized protein		25	12	791	86.8	6.09
2.66361	0.00216965	2.72926	A0A3B6GQC0	Uncharacterized protein		50	15	438	48.3	7.47
1.58924	0.025749	2.72836	A0A3B6SG98	Uncharacterized protein		5	2	521	57.8	7.65
3.05246	0.000886217	2.71916	A0A3B6S9M7	40S ribosomal protein S30		18	2	62	6.9	12.03
2.0196	0.00955863	2.71901	A0A3B5YXN3	Mitogen-activated protein kinase (EC 2.7.11.24)		40	10	359	41	5.78
1.34522	0.0451626	2.71859	A0A3B6MV50	NAD(P)-bd_dom domain-containing protein		36	9	369	40.4	7.08
1.61478	0.0242785	2.71625	A0A3B6PHJ8	Uncharacterized protein		55	14	440	49.1	6.23
4.3926	4.04946e-05	2.71492	D8L9M9	COV1-like protein, expressed	TAA_ctg0464b.00250.1 TRAES_3BF006700040CFD_c1	14	2	259	28.8	7.3		membrane
2.35735	0.00439188	2.71113	A0A3B6KBE6	VWFA domain-containing protein		25	9	526	56.2	5.1
4.44777	3.56643e-05	2.70597	A0A1D5UXT7	Cysteine proteinase inhibitor	CAMPLR22A2D_LOCUS1134	33	3	123	13.1	10.13	regulation of biological process		enzyme regulator activity
4.35263	4.43985e-05	2.70487	A0A3B6B6Y3	Usp domain-containing protein		37	4	164	17.8	7.08
2.90909	0.00123285	2.70229	A0A3B6LJ38	Uncharacterized protein		9	2	608	67.7	5.49
3.1529	0.00070324	2.69856	A0A3B6A1X9	Uncharacterized protein		11	2	369	39.1	4.84
1.96481	0.010844	2.69422	A0A3B6PMV4	Uncharacterized protein		25	7	462	50.4	6.95
1.49821	0.0317531	2.69335	A0A3B6B810	Uncharacterized protein		20	2	255	27.5	6.77
2.47479	0.00335126	2.69297	A0A3B6IPV2	Importin N-terminal domain-containing protein		20	12	1096	120.9	4.68
2.76717	0.00170934	2.69253	A0A3B6AUN8	Uncharacterized protein		16	4	482	53.5	9.92
1.56068	0.0274991	2.68438	A0A3B6MUC8	SAM_MT_RSMB_NOP domain-containing protein		26	15	873	97.4	5.67
2.04465	0.00902299	2.68392	A0A3B6U5E2	Uncharacterized protein		37	7	218	23.5	5.14
2.18154	0.00658352	2.68261	A0A6G9HC52			29	17	809	86.8	7.87
3.73891	0.000182428	2.67961	P24846	4-hydroxy-tetrahydrodipicolinate synthase 1, chloroplastic (HTPA synthase 1) (EC 4.3.3.7)		25	5	388	42.4	7.39	metabolic process		catalytic activity
2.71856	0.00191181	2.67909	D4NYD5	Cytosolic aconitase (Fragment)	cACO	51	16	456	50.2	6.18	metabolic process
1.60464	0.0248521	2.67644	W5GG94	Cellulose synthase (EC 2.4.1.12)		22	14	1075	121.2	6.87	cell organization and biogenesis;metabolic process	membrane	catalytic activity;metal ion binding
3.39526	0.000402473	2.64821	A0A3B6B442	AA_kinase domain-containing protein		24	6	337	34.7	8.47
1.84184	0.0143931	2.64671	A0A3B6JNV3	Uncharacterized protein		7	2	384	42.7	6.55
2.41491	0.0038467	2.64499	A0A3B6JED4	VOC domain-containing protein		50	4	142	15.3	6.16
2.21911	0.00603801	2.64398	A0A3B6DPI7	Uncharacterized protein		27	5	292	32.2	6.28
1.65868	0.0219443	2.63872	Q6RUJ1	Glutamine synthetase (EC 6.3.1.2)	GS	62	13	354	38.6	5.57	metabolic process		catalytic activity;nucleotide binding
2.44392	0.00359819	2.63519	A0A3B6ISH5	Uncharacterized protein		22	2	204	22.1	8.78
1.47818	0.0332524	2.62954	A0A3B6HLY4	Protein kinase domain-containing protein		6	3	680	74.1	6.34
5.06942	8.52267e-06	2.62947	A0A3B6TTA7	Phospholipase D (EC 3.1.4.4)		29	14	824	92.2	6.51
1.63825	0.0230009	2.62811	A0A3B6FTX6	Uncharacterized protein		10	5	979	109.5	6.54
2.11593	0.00765716	2.62392	A0A3B6SFC2	Uncharacterized protein		4	2	839	91.4	6.48
2.4793	0.00331663	2.62314	A0A3B5Z2R8	TRUD domain-containing protein		14	5	701	76.4	6.64
1.37307	0.0423577	2.62164	A0A3B6TQ81	CRAL-TRIO domain-containing protein		26	10	572	62.2	5.16
2.81337	0.00153683	2.61708	A0A3B6A1X7	Uncharacterized protein		17	6	558	59.7	6.65
2.96591	0.00108167	2.60727	A0A077RSN8	AAA domain-containing protein	TRAES_3BF020200060CFD_c1	4	2	764	83.4	7.33	metabolic process	membrane	catalytic activity;nucleotide binding
3.52215	0.000300507	2.6047	A0A3B6EQ19	Uncharacterized protein		21	7	378	42.3	6.87
2.43815	0.00364626	2.60464	A0A3B5ZRH7	Flavodoxin-like domain-containing protein		37	5	253	26.5	7.14
1.38435	0.0412711	2.60103	Q2A784	Avenin-like a1 (LMW-gliadin 2482) (LMGli2482) (TaAvlike-a1)	AVNLA	21	2	168	18.4	8.02
2.03373	0.00925276	2.59686	A0A3B5Z003	Uncharacterized protein		20	6	614	66.7	5.53
3.00102	0.000997659	2.5952	A0A3B6C3L5	Ubiquitin carboxyl-terminal hydrolase (EC 3.4.19.12)		8	4	750	79.7	8.98
1.39024	0.0407157	2.59436	A0A3B6AUB3	GRAM domain-containing protein		24	4	235	25.2	6.54
1.87226	0.0134196	2.59428	Q8LL15	Glutathione-S-transferase 28e45		36	6	228	24.8	5.73			catalytic activity;protein binding
1.55615	0.0277876	2.59152	A0A3B6GV75	Uncharacterized protein		9	2	319	34.1	9.85
1.47672	0.0333638	2.59113	A0A3B6HXV8	Uncharacterized protein		17	6	444	46.8	8.63
1.99788	0.0100489	2.59048	A0A3B6FKI0	Uncharacterized protein		11	2	414	44.6	6.33
5.22861	5.90735e-06	2.58658	A0A3B6JNP9	tRNA-synt_1e domain-containing protein		31	12	563	63.6	6.34
3.7525	0.000176806	2.58625	A0A3B6ITU8	Uncharacterized protein		58	20	500	54.4	6.13
2.55956	0.00275702	2.57524	A0A3B6N206	Tr-type G domain-containing protein		56	19	447	50.3	7.33
1.62746	0.0235796	2.57422	A0A3B5YXN9	Uncharacterized protein		23	3	332	34.7	6.18
3.56242	0.000273893	2.57265	A0A3B6NLB6	Uncharacterized protein		21	2	201	22.1	6.98
1.47854	0.0332247	2.5609	A0A3B6HP86	SE domain-containing protein		10	3	532	56.8	8.43
2.84311	0.00143512	2.56013	W5HTZ1	Uncharacterized protein		33	5	172	19.7	10.26	metabolic process	ribosome	structural molecule activity
1.45274	0.0352579	2.55402	A0A3B6ARM3	Uncharacterized protein		54	12	355	39.8	6.99
1.63896	0.0229636	2.54448	G5CEW6	Eukaryotic translation initiation factor 4G (eIF-4G) (eIF4G) (Eukaryotic initiation factor 4F subunit p220) (eIF-4F p220 subunit)		18	17	1488	162.1	6.54	metabolic process;regulation of biological process		protein binding;RNA binding
2.64175	0.00228166	2.54366	A0A3B6HSF4	Radical_SAM domain-containing protein		7	2	381	41.6	9.13
3.08708	0.000818319	2.53651	A0A3B6ISB7	Uncharacterized protein		79	21	368	41.5	6.19
3.00757	0.000982717	2.53381	A0A3B6KKZ3	HTH La-type RNA-binding domain-containing protein		4	2	495	51.8	7.12
2.78741	0.00163151	2.52956	A0A3B6I072	Arf-GAP domain-containing protein		24	6	414	45	8.88
1.40074	0.0397428	2.52842	A0A3B6RA79	Histone H3		35	3	136	15.3	11.3
1.74962	0.0177984	2.52688	A0A3B6FQD3	Uncharacterized protein		15	2	250	28	6.8
4.07033	8.50489e-05	2.52536	A0A3B5XWM9	Uncharacterized protein		54	33	841	93.2	5.22
2.75357	0.00176374	2.52062	A0A3B6RC34	Glycosyltransferase (EC 2.4.1.-)		9	3	476	50.5	5.69
2.90309	0.00125	2.5158	A0A3B5Z0D1	Aldo_ket_red domain-containing protein		33	9	320	35.9	7.12
3.21735	0.000606244	2.51403	A0A3B6PMK1	Uncharacterized protein		12	5	688	70.4	5.74
3.09698	0.000799874	2.51155	A0A3B6UB41	Eukaryotic translation initiation factor 3 subunit J (eIF3j)		39	7	230	25.8	4.84
1.37529	0.0421412	2.50508	A0A3B6TJS0	NAD(P)-bd_dom domain-containing protein		42	9	376	41.8	7.01
1.55511	0.027854	2.50459	A0A2X0TRX7	MI domain-containing protein	CAMPLR22A2D_LOCUS1992	17	18	1873	203.2	7.61
2.60728	0.00247015	2.50316	A0A3B6JD74	Uncharacterized protein		30	2	96	10.6	5.85
1.49007	0.0323538	2.50311	A0A3B6MZ83	Inosine-5'-monophosphate dehydrogenase (IMP dehydrogenase) (IMPD) (IMPDH) (EC 1.1.1.205)		43	9	497	52.1	6.06
2.06242	0.0086613	2.50006	Q6XEB8	Malate dehydrogenase (EC 1.1.1.37) (Fragment)		78	12	227	24.3	7.09	metabolic process		catalytic activity
1.37935	0.0417492	2.49962	A0A3B6LVR1	Uncharacterized protein		27	2	178	18.5	6.25
3.83685	0.000145596	2.49911	A0A0D3MT32	RAR1	RAR1	9	2	233	25.5	7.84	cell death;defense response;metabolic process;regulation of biological process;response to stimulus	cytoplasm;nucleus	metal ion binding;protein binding
2.1707	0.0067499	2.49384	A0A3B6ETX3	Peptidase A1 domain-containing protein		15	4	416	43.5	8.68
2.66089	0.00218328	2.49181	A0A3B6E9G7	Uncharacterized protein		11	2	261	26.1	6.77
1.91832	0.0120693	2.48703	A0A3B6LG23	Peroxidase (EC 1.11.1.7)		9	2	340	36.9	6.27
2.11993	0.007587	2.48412	A0A3B6CH89	Peroxidase (EC 1.11.1.7)		36	9	341	35.4	7.9
2.11132	0.00773895	2.47672	A0A3B6TC30	Uncharacterized protein		33	6	378	41.6	4.92
2.63121	0.00233772	2.47447	W5A520	SUI1 domain-containing protein		59	3	115	12.6	8.43	metabolic process		RNA binding
3.15448	0.000700681	2.47431	A0A3B6JIW0	Protein kinase domain-containing protein		8	3	787	82.2	7.64
1.65015	0.0223794	2.46251	A0A3B6IR56	Uncharacterized protein		30	4	328	34	6.79
3.93774	0.000115414	2.4576	A0A3B6NLY0	Glyceraldehyde-3-phosphate dehydrogenase (EC 1.2.1.-)		45	11	416	43.8	8.05
2.13346	0.00735433	2.45136	Q9XEN5	Beta-1,3-glucanase	Glb3	16	3	334	34.9	6.04	metabolic process		catalytic activity
2.96506	0.00108378	2.45115	A0A3B5Y3Y4	Poly [ADP-ribose] polymerase (PARP) (EC 2.4.2.-)		14	9	824	91.8	5.29
2.5801	0.00262969	2.45101	A0A3B6EI57	Uncharacterized protein		3	2	1118	123.1	6.18
4.2743	5.31743e-05	2.44974	A0A077RQY6	Uncharacterized protein	TRAES_3BF013900030CFD_c1	10	2	513	55.7	8.65	metabolic process	nucleus
2.95457	0.00111027	2.44901	A0A3B6TN57	Uncharacterized protein		24	5	408	44	9.47
2.03924	0.00913604	2.44688	A0A3B6TDT0	Uncharacterized protein		12	3	565	60.1	8.54
3.95498	0.000110923	2.44615	A0A3B5Z314	ATP-dependent 6-phosphofructokinase (ATP-PFK) (Phosphofructokinase) (EC 2.7.1.11) (Phosphohexokinase)	PFK	47	16	566	62	7.08
2.15469	0.00700345	2.43745	A0A3B6RP16	GGACT domain-containing protein		21	2	187	20.8	5.16
1.36051	0.0436002	2.434	A0A3B6TQ93	AvrRpt-cleavage domain-containing protein		16	2	242	25.7	9.38
1.53377	0.0292572	2.43367	W5AY74	Caleosin	Clo2	12	2	243	27.7	6.81
3.23586	0.000580956	2.43202	A0A3B5ZR06	Usp domain-containing protein		77	7	166	17.8	6.54
1.88547	0.0130174	2.43087	A0A341Z185	HMA domain-containing protein		35	2	77	8.2	6.6
1.56995	0.0269184	2.41868	A0A3B6LHI2	Uncharacterized protein		15	4	445	49.9	7.12
2.84999	0.00141257	2.41142	A0A3B6BZ18	Vps54 domain-containing protein		18	9	993	108.8	5.95
2.8288	0.00148322	2.40918	A0A3B6EBA4	Uncharacterized protein		9	2	238	26.1	7.27
1.69605	0.0201351	2.40752	A0A3B6PI86	Uncharacterized protein		40	8	372	39.5	9.44
3.10034	0.000793706	2.39974	A0A3B6RAY1	Bet_v_1 domain-containing protein		55	6	160	17.2	5.33
1.33739	0.0459848	2.39758	A0A3B6PP38	Uncharacterized protein		5	3	988	107.8	6.83
2.70194	0.00198636	2.39623	A0A3B6SKP8	Glucose-6-phosphate 1-epimerase (EC 5.1.3.15)		21	3	322	35.8	6.74
2.33441	0.00463007	2.39367	A0A3B6MU40	Glycosyltransferase (EC 2.4.1.-)		5	2	487	53.2	6.47
1.33391	0.0463538	2.3929	A0A3B6KFT2	UBX domain-containing protein		10	3	428	45.9	8.03
1.3241	0.0474138	2.39067	A0A3B5ZVE9	Uncharacterized protein		73	11	213	22.8	5.06
1.45117	0.0353862	2.38988	A0A3B5XZI1	Uncharacterized protein		15	5	567	62.2	7.61
4.60928	2.45876e-05	2.38947	A0A3B6TKY5	Uncharacterized protein		48	9	271	30.3	6.8
2.51566	0.00305031	2.37504	A0A3B6QC94	Uncharacterized protein		21	2	201	22	6.98
2.58407	0.00260576	2.37443	A0A3B6APF8	Uncharacterized protein		52	7	217	22.9	6.35
2.68727	0.00205461	2.37349	A0A3B6HNI0	Uncharacterized protein		15	9	828	89.5	5.59
1.99877	0.0100283	2.37308	A0A3B6JP36	Uncharacterized protein		32	5	271	29.4	8.5
1.60817	0.0246509	2.37029	A0A077S0B2	Uncharacterized protein	TRAES_3BF092700010CFD_c1	14	4	515	57.1	5.31	metabolic process		catalytic activity
2.84941	0.00141446	2.36499	A0A3B6KR91	GLTP domain-containing protein		15	2	206	22.5	9.16
2.02629	0.00941263	2.36385	A0A3B6ASD2	Uncharacterized protein		34	20	922	105.4	6.61
1.38847	0.0408816	2.35984	A0A3B6JI46	PKS_AT domain-containing protein		45	10	376	39.8	8.38
4.40086	3.97323e-05	2.35619	A0A077RU67	Uncharacterized protein	TRAES_3BF168400010CFD_c1	29	3	182	19.4	7.66	regulation of biological process	extracellular	enzyme regulator activity
2.94148	0.00114424	2.35251	A0A3B6T9J5	Uncharacterized protein		41	8	262	28.3	6.44
1.67156	0.0213029	2.35214	A0A3B6LVB5	H15 domain-containing protein		23	2	247	25.3	10.65
2.92381	0.00119177	2.34583	A0A3B6MN50	Uncharacterized protein		10	3	400	44.7	8.22
4.02743	9.38788e-05	2.34016	S4Z1Z3	ATP-dependent Clp protease proteolytic subunit (EC 3.4.21.92) (Endopeptidase Clp)	clpP TRAES_3BF007300190CFD_c1	20	3	216	24.7	4.87	metabolic process		catalytic activity
2.4677	0.00340646	2.33816	A0A3B6SN06	Uncharacterized protein		46	28	891	101.1	5.97
3.2716	0.000535056	2.33786	A0A3B6NTZ3	Uncharacterized protein		12	5	755	85.2	4.86
3.39595	0.000401834	2.3375	A0A3B6TKG9	Uncharacterized protein		17	2	219	22.4	6.28
2.57926	0.00263476	2.33705	A0A3B6SKM7	Uncharacterized protein		68	10	148	16.7	5.16
2.65928	0.00219141	2.3358	A0A3B6B4G0	RRM domain-containing protein		19	4	317	33.4	5.19
1.38983	0.0407544	2.33227	A0A3B6IQA6	Uncharacterized protein		19	3	324	34.8	9.8
1.92645	0.0118454	2.32855	A0A3B5Y269	Uncharacterized protein		18	2	179	18.2	7.93
1.9197	0.0120309	2.32147	A0A3B6NLP2	VID27 domain-containing protein		23	8	652	71	6.43
2.11035	0.00775621	2.31791	A0A3B6IW41	FAS1 domain-containing protein		11	3	421	43.1	6.33
3.81413	0.000153417	2.31719	A4ZCD1	GTP-binding protein	GBP-1	36	14	533	58.9	5.72		cytosol;vacuole	catalytic activity;nucleotide binding
2.90016	0.00125847	2.31533	A0A3B6N326	Protein kinase domain-containing protein		8	4	1226	133.6	5.45
4.72788	1.87119e-05	2.313	A0A1D5UL14	Uncharacterized protein	CAMPLR22A2D_LOCUS2805	28	8	425	46.9	5.72
3.45469	0.000351005	2.30697	A0A3B6SEK6	Importin N-terminal domain-containing protein		8	4	829	92	5.52
1.91288	0.0122213	2.30087	A0A3B6B3R3	Uncharacterized protein		17	4	363	41.2	6.8
1.86201	0.0137403	2.29377	A0A3B6LLG7	UBIQUITIN_CONJUGAT_2 domain-containing protein		26	2	183	20.6	8.53
6.36869	4.27869e-07	2.28906	A0A3B6REV7	Sucrose synthase (EC 2.4.1.13)		64	41	808	92.4	6.09
1.99369	0.0101462	2.28574	A0A3B6MXV6	Protein kinase domain-containing protein		8	3	562	62.1	6.93
1.95222	0.011163	2.28429	A0A3B5XXM4	Inosine triphosphate pyrophosphatase (ITPase) (Inosine triphosphatase) (EC 3.6.1.9) (Non-canonical purine NTP pyrophosphatase) (Non-standard purine NTP pyrophosphatase) (Nucleoside-triphosphate diphosphatase) (Nucleoside-triphosphate pyrophosphatase) (NTPase)		25	3	209	22.7	5.66
2.16124	0.00689858	2.28102	A0A3B6SH09	tRNA-synt_1g domain-containing protein		8	3	596	67.2	6.14
2.92737	0.00118204	2.27946	A0A3B6I2T7	Epimerase domain-containing protein		33	4	218	23.6	8.06
1.92645	0.0118454	2.27941	A0A3B5Z4E1	Uncharacterized protein		37	3	176	19.3	5.17
2.56564	0.00271868	2.27527	A9UIE5	Protease inhibitor-like protein		27	2	131	13.4	8.51	metabolic process		catalytic activity
2.58712	0.00258752	2.26856	A0A3B6JGQ8	Uncharacterized protein		46	18	537	57.7	5.55
1.91978	0.0120288	2.25968	A0A3B6MKW8	Uncharacterized protein		14	2	173	17.8	7.72
2.68766	0.00205277	2.25584	A0A3B6RQV8	AAI domain-containing protein		34	3	133	13.6	7.43
3.1416	0.000721774	2.2484	Q6W8Q2	1-Cys peroxiredoxin PER1 (EC 1.11.1.15) (Rehydrin homolog) (Thioredoxin peroxidase)	PER1	57	11	218	24	6.54	cellular homeostasis;metabolic process;regulation of biological process	cytoplasm;nucleus	antioxidant activity;catalytic activity
3.33681	0.000460453	2.24671	Q8LPA7	Cold shock protein-1	WCSP1	74	7	229	21.4	6.1	regulation of biological process		DNA binding;metal ion binding
4.98343	1.03889e-05	2.24577	A0A3B5YUP3	Phosphotransferase (EC 2.7.1.-)		11	3	463	50.2	6.14
2.17047	0.00675351	2.24288	A0A3B6TBJ4	Abhydrolase_3 domain-containing protein		27	4	323	34.4	5.8
2.43142	0.00370319	2.24013	W5C092	AAI domain-containing protein	CAMPLR22A2D_LOCUS4107	21	2	131	13.3	8.35
1.44229	0.0361166	2.23257	A0A3B5XVL2	Uncharacterized protein		40	12	347	37.6	9.23
4.84972	1.41344e-05	2.22958	A0A3B6B8Q6	Dihydroorotate dehydrogenase (quinone), mitochondrial (DHOdehase) (EC 1.3.5.2)		9	3	511	54	9.28
3.38814	0.000409128	2.22707	A0A3B5Y1A6	CASP-like protein		18	2	189	19.8	9.55
4.66005	2.18752e-05	2.22617	A0A3B5YUS7	Pyridoxal phosphate homeostasis protein (PLP homeostasis protein)		12	2	243	26.1	6.35
1.6747	0.0211493	2.2226	A0A3B6LJ29	Signal recognition particle subunit SRP68 (SRP68)		21	9	600	68.1	8.57
1.64033	0.0228911	2.21703	A0A3B6LW16	Ferredoxin		50	3	154	16.3	5.05
2.96019	0.00109601	2.21374	A0A3B6TCJ3	Acylphosphatase (EC 3.6.1.7)		46	2	113	11.7	7.53
2.6487	0.00224541	2.20592	W5EJ68	Protein kinase domain-containing protein		20	5	355	40	5.8	metabolic process;regulation of biological process;response to stimulus		catalytic activity;nucleotide binding
2.54527	0.00284927	2.19504	A0A3B6JFX9	UDP-glucose 6-dehydrogenase (EC 1.1.1.22)		61	17	480	52.8	6.16
3.52542	0.000298247	2.19137	A0A3B6RIG1	TOG domain-containing protein		19	4	376	40.2	5.31
2.86972	0.00134983	2.18971	A0A3B6BWU8	Peptidyl-prolyl cis-trans isomerase (EC 5.2.1.8)		25	2	123	13.2	9.36
4.63247	2.33093e-05	2.18966	P41378	Eukaryotic initiation factor 4A (eIF-4A) (EC 3.6.4.13) (ATP-dependent RNA helicase eIF4A)		76	28	414	46.9	5.48	metabolic process		catalytic activity;nucleotide binding;RNA binding
2.76889	0.00170258	2.18606	A0A3B5Z3H0	Ribosomal_L12 domain-containing protein		22	3	245	25.9	9.73
3.28245	0.000521854	2.18168	A0A3B6AUL0	AAI domain-containing protein		21	2	179	17	8.48
2.03379	0.00925135	2.18096	A0A3B6RHB6	Protein kinase domain-containing protein		6	4	856	94	6.92
3.25327	0.000558118	2.18068	A0A3B6FIX9	Uncharacterized protein		37	22	803	91.1	6.65
3.45564	0.000350239	2.17959	W5D0N2	L51_S25_CI-B8 domain-containing protein	TRAES_3BF161200030CFD_c1	20	2	119	13.6	10.56
5.0555	8.8003e-06	2.17647	A0A3B6HQX9	Uncharacterized protein		60	23	613	65.8	6.06
3.59719	0.000252818	2.17637	A0A3B5Z0H5	Uncharacterized protein		25	5	375	42.4	6.46
1.61379	0.0243336	2.17465	A0A3B6AYB5	Uncharacterized protein		11	5	561	63.8	6.96
2.92574	0.00118649	2.16932	A0A3B6A138	Eukaryotic translation initiation factor 3 subunit D (eIF3d) (Eukaryotic translation initiation factor 3 subunit 7) (eIF-3-zeta)		50	18	588	65.6	5.72
1.32707	0.0470899	2.16872	A0A3B6TZD9	Uncharacterized protein		61	8	266	28.4	8.7
1.73763	0.0182968	2.16497	A0A3B6KRY8	H15 domain-containing protein		19	2	290	29.6	10.8
1.59049	0.025675	2.16428	A0A3B6NIJ7	Protein disulfide-isomerase (EC 5.3.4.1)		34	14	582	63.5	4.73
3.71454	0.000192955	2.15922	A0A3B6GWS9	Malate dehydrogenase (EC 1.1.1.37)		58	10	340	35.4	8.37
4.0079	9.8197e-05	2.15233	A0A3B5ZRE8	Uncharacterized protein		46	29	835	92.6	5.17
3.02847	0.000936557	2.15136	A0A3B6CCM3	Peroxidase (EC 1.11.1.7)		25	7	361	37.6	7.61
1.90833	0.0123502	2.15038	A0A3B6BZF0	Uncharacterized protein		4	3	1263	137.2	5.39
1.44716	0.0357137	2.14629	A0A3B6EG69	DUF1681 domain-containing protein		12	2	307	33.9	4.88
1.91914	0.0120465	2.1447	A0A3B5XUX2	Phosphoinositide phospholipase C (EC 3.1.4.11)		7	2	579	65.3	6.42
2.72647	0.00187727	2.14227	A0A3B6MYB3	YTH domain-containing protein		7	2	604	65.4	7.99
3.59392	0.00025473	2.13267	A0A3B6MMF1	Uncharacterized protein		37	4	164	17.6	7.75
1.90311	0.0124993	2.12821	A0A3B6B982	Peroxidase (EC 1.11.1.7)		37	9	341	35.5	7.9
5.35361	4.42987e-06	2.12755	A0A3B6B862	Peroxidase (EC 1.11.1.7)		48	12	370	39	5.72
2.32344	0.00474851	2.12591	A0A3B6JHF3	Protein kinase domain-containing protein		13	2	321	36	7.24
3.66814	0.000214714	2.1257	A0A3B6KE67	Pyrophosphate--fructose 6-phosphate 1-phosphotransferase subunit alpha (PFP) (6-phosphofructokinase, pyrophosphate dependent) (PPi-PFK) (Pyrophosphate-dependent 6-phosphofructose-1-kinase)	PFP-ALPHA	38	14	621	67.6	7.27
1.53499	0.0291748	2.12088	A0A3B6C2N7	Sulfotransferase (EC 2.8.2.-)		23	4	369	41.1	8.35
3.52005	0.000301963	2.11791	Q5EWZ1	Actin	ACT-1	64	16	377	41.7	5.4			nucleotide binding
1.92342	0.0119284	2.11652	A0A3B6JFS6	Alanine--tRNA ligase (EC 6.1.1.7) (Alanyl-tRNA synthetase) (AlaRS)		38	26	1006	109.5	6.42
1.72891	0.0186675	2.10727	A0A3B6LV38	Diphosphomevalonate decarboxylase (EC 4.1.1.33)		35	8	420	45.9	6.55
3.3046	0.000495909	2.10694	A0A3B6HQ57	Uncharacterized protein		25	4	227	24.8	8.68
5.02859	9.36284e-06	2.10621	A0A3B6MJS6	Sulfurtransferase		50	15	424	45.1	7.58
1.36956	0.0427015	2.10295	A0A3B6RHA7	Peroxidase (EC 1.11.1.7)		14	4	356	37.4	8.19
4.5398	2.88534e-05	2.09209	A0A3B6EB75	Uncharacterized protein		35	4	259	29	4.77
1.73148	0.0185577	2.08696	A0A3B6JP75	SRP54 domain-containing protein		10	4	646	69.9	8.31
1.85042	0.0141116	2.0868	A0A3B6DBC2	Protein kinase domain-containing protein		10	4	791	81.7	7.78
1.53297	0.0293109	2.08441	A0A3B6LQ01	ANK_REP_REGION domain-containing protein		49	10	330	35.5	4.59
3.92002	0.000120221	2.07882	A0A3B6C0E7	Uncharacterized protein		20	3	335	35.6	7.06
2.04438	0.00902859	2.07036	A0A3B6RCD2	Kinesin-like protein		2	2	906	99.4	6.54
3.04637	0.000898723	2.06693	B5TQZ1	Truncated hemoglobin Hb2b		45	6	171	19.6	6.42
3.56786	0.000270482	2.06219	A0A3B6GY19	YTH domain-containing protein		5	2	688	75	6.01
3.72705	0.000187476	2.06174	A0A3B6JIZ6	Macro domain-containing protein		41	5	200	21.4	6.2
2.70285	0.00198219	2.05999	A0A3B6RSI3	Amino_oxidase domain-containing protein		6	3	508	56.9	7.06
2.27626	0.0052935	2.05604	A0A3B6RGH8	Acylphosphatase (EC 3.6.1.7)		45	2	110	11.5	8.68
4.08568	8.20952e-05	2.05515	A0A3B6TDT8	Uncharacterized protein		10	3	305	33	6.84
4.40091	3.97276e-05	2.05294	A0A7H4LP54			39	9	364	40.5	5.55
2.29648	0.00505265	2.0517	A0A3B6IQ42	3-oxoacyl-[acyl-carrier-protein] synthase		8	3	461	49.5	7.03
2.17054	0.00675248	2.04779	A0A3B6KLR9	Uncharacterized protein		32	3	197	22.1	5.63
1.78528	0.0163953	2.04541	A0A3B6MNM8	AMP-binding domain-containing protein		19	9	698	76.7	6.62
3.4499	0.000354894	2.04416	A0A1B5GEW3	Caleosin	Clo9	43	7	234	26	7.69
2.11477	0.00767768	2.03577	A0A3B6PG68	Aspartate aminotransferase (EC 2.6.1.1)		50	14	426	47.4	6.84
2.18871	0.00647569	2.02654	A0A3B6MW71	Protein kinase domain-containing protein		20	4	347	38.1	7.8
3.14253	0.000720224	2.02382	A0A3B6AZ19	PCI domain-containing protein		55	16	425	47.3	5.83
1.72812	0.0187017	2.02249	A0A3B6SDN9	Serine/threonine-protein phosphatase 2A activator (EC 5.2.1.8) (Phosphotyrosyl phosphatase activator)		14	2	393	42.4	7.23
1.65967	0.0218941	2.02225	A0A3B6EF21	Uncharacterized protein		41	8	262	28.3	6.52
3.54417	0.000285649	2.02177	A0A3B6AWW2	SEC7 domain-containing protein		41	42	1585	175.6	5.74
2.2234	0.00597859	2.01953	A0A3B6FZA7	Uncharacterized protein		16	2	252	25.5	5.68
4.24672	5.666e-05	2.01286	A9U8G4	Alcohol dehydrogenase ADH1A		71	17	379	41	6.6	metabolic process		catalytic activity;metal ion binding
1.84793	0.014193	2.00853	A0A3B6QKB5	Peptidase A1 domain-containing protein		11	3	453	47.3	5.07
1.86796	0.0135532	1.9991	A0A3B6SKB0	Epimerase domain-containing protein		27	5	322	34.9	8.18
5.51846	3.0307e-06	1.98819	A0A3B6IK77	Calcium load-activated calcium channel (CLAC channel)		27	4	199	20.9	9.99
1.58036	0.026281	1.98769	A0A3B6N330	Uncharacterized protein		7	4	885	98	7.23
3.60577	0.000247876	1.98082	A0A1D6RLV5	Iso_dh domain-containing protein		35	8	367	39.4	6.73	metabolic process		catalytic activity
1.67856	0.0209622	1.97399	A8QRP5	Grain softness protein (Fragment)	Gsp1B	21	3	163	18.3	7.78
2.07817	0.00835266	1.97376	A0A3B6LJ14	Uncharacterized protein		6	2	339	36.7	5.06
4.85721	1.38929e-05	1.97279	A0A3B5XVF6	Aminotran_1_2 domain-containing protein		72	24	482	52.8	6.55
3.51393	0.000306244	1.96855	A0A3B5YWS5	Uncharacterized protein		47	6	237	24.9	5.03
5.27317	5.33123e-06	1.96447	A0A3B6LT20	DUF3700 domain-containing protein		72	12	255	26.7	5.85
1.77588	0.016754	1.96331	A0A3B5ZS37	Glutamine amidotransferase type-1 domain-containing protein		15	15	1421	155.5	5.39
2.05508	0.00880895	1.95712	A0A3B5ZYT4	Uncharacterized protein		3	2	918	101	6.24
2.55346	0.00279602	1.95631	A0A3B6EA16	Uncharacterized protein		23	2	172	18.8	5.63
2.34582	0.00451	1.95528	A0A3B6C2S1	Uncharacterized protein		32	2	88	10	10.14
3.40543	0.000393163	1.9483	A0A3B6C8Y5	Uncharacterized protein		9	4	751	80	6.81
2.38807	0.0040919	1.94826	A0A3B6JJ66	Uncharacterized protein		61	23	605	64.8	5.87
1.91385	0.0121942	1.94574	A0A3B5XZC6	Nascent polypeptide-associated complex subunit beta		40	6	169	18.2	7.25
3.07892	0.000833841	1.9448	A0A3B5Z1E7	PX domain-containing protein		7	2	517	57	6.64
1.80146	0.0157956	1.94214	A0A3B6TSI9	Uncharacterized protein		24	9	684	70.9	4.84
2.31599	0.00483072	1.94074	A0A3B6TBN8	GRAM domain-containing protein		29	6	296	31.7	5.86
1.91185	0.0122503	1.94016	A0A3B6NWC5	Epimerase domain-containing protein		13	2	153	17.1	9.57
1.6854	0.0206347	1.94015	I7JI43	Histidine-containing phosphotransfer protein 3	HP	27	2	147	16.2	5.14	regulation of biological process;response to stimulus		signal transducer activity
1.74165	0.018128	1.93765	A0A3B6MKZ7	Cellulase domain-containing protein		31	8	488	54	6.81
3.49004	0.000323565	1.93755	A0A6J4BJG4			40	7	373	40.8	5.58
1.58907	0.0257589	1.93565	A0A1D5U807	Ribosomal protein L19		26	4	211	24.4	11.44	metabolic process	ribosome	structural molecule activity
1.3645	0.043202	1.9356	Q06I93	Fasciclin-like protein FLA13		13	2	267	26.9	5.6
2.01695	0.00961727	1.93528	A0A3B6KT80	WD_REPEATS_REGION domain-containing protein		30	5	305	33.3	6.21
2.85611	0.0013928	1.92965	A0A1D5UK00	C3HC-type domain-containing protein	CAMPLR22A2D_LOCUS2489	7	4	940	100.2	5.12		nucleus	metal ion binding
1.67312	0.0212266	1.92555	A0A2P1AAS8	ABCF1a		37	14	592	66	6.54
2.27574	0.00529985	1.92507	A0A3B6TVK6	Epimerase domain-containing protein		35	6	322	35	6.39
2.15319	0.00702763	1.91991	A0A3B5Z4E5	Uncharacterized protein		14	7	873	92.9	5.36
4.18726	6.49742e-05	1.9174	B2BA43	V-type proton ATPase proteolipid subunit		33	2	165	16.6	8.47	transport	membrane;vacuole	transporter activity
2.49731	0.00318193	1.91666	A0A3B6IU95	Uncharacterized protein		58	20	605	64.8	5.68
1.32568	0.047241	1.91617	A0A3B6CJ56	Uncharacterized protein		37	10	536	55.6	6.58
1.85039	0.0141126	1.91258	A0A3B6PMW9	PigN domain-containing protein		5	2	973	110.2	7.91
1.68522	0.0206434	1.90906	A0A3B6QKH8	S-(hydroxymethyl)glutathione dehydrogenase (EC 1.1.1.284)		49	11	381	40.6	6.81
3.21976	0.000602899	1.90008	A0A3B6GTM0	Uncharacterized protein		56	9	248	27.8	7.69
1.82359	0.015011	1.89954	A0A3B6NPE6	Succinate-semialdehyde dehydrogenase (EC 1.2.1.24)		29	8	515	54.6	7.66
1.53361	0.0292678	1.89735	A0A3B6B2Q2	Uncharacterized protein		9	3	481	51	7.84
4.24448	5.69538e-05	1.89604	A0A3B5ZRA1	Uncharacterized protein		45	13	347	37.5	9
2.42167	0.00378735	1.89128	A0A3B6QIP5	Usp domain-containing protein		25	2	165	17.8	8.84
2.79821	0.00159142	1.88826	A0A3B5ZVJ0	Uncharacterized protein		34	12	435	47.9	6.18
3.6807	0.000208594	1.8859	A0A3B6MRY3	Uncharacterized protein		37	7	374	40	4.42
1.30104	0.0499994	1.88242	A0A3B6B1Y6	Uncharacterized protein		5	2	774	87.2	5.57
4.19954	6.31629e-05	1.88186	A0A3B5ZVF4	Uncharacterized protein		31	11	603	68.5	7.02
4.59598	2.53527e-05	1.87827	A0A3B6SBE7	ThiF domain-containing protein		27	9	423	46	4.84
2.63483	0.00231829	1.8775	A0A3B5Z0A0	Uncharacterized protein		53	5	195	18.4	5.85
2.69813	0.00200385	1.87571	A0A3B5ZTN5	PHB domain-containing protein		31	6	293	32.2	7.33
2.79904	0.00158839	1.87293	W5ADS2	Ubiquitin-like domain-containing protein		64	13	155	17.7	9.8	metabolic process	ribosome	protein binding;structural molecule activity
2.31446	0.00484771	1.87188	A0A3B6MNB6	Uncharacterized protein		5	2	538	57.5	9.72
2.0793	0.00833099	1.87128	A0A3B6MNV1	RING-type domain-containing protein		4	2	1135	123.2	7.25
1.56443	0.0272628	1.87008	A0A3B6PN02	Peptidase A1 domain-containing protein		8	2	453	47.4	5.24
3.34739	0.000449373	1.86796	A0A3B6LII4	Uncharacterized protein		33	3	153	16	4.88
3.56322	0.000273386	1.86587	A0A3B6TKL3	Uncharacterized protein		42	11	402	44.7	6.23
3.67746	0.000210155	1.86426	A0A3B6JNU8	40S ribosomal protein S3a		58	13	263	30	9.79
2.79123	0.00161723	1.86223	A0A3B6GRG0	LRRNT_2 domain-containing protein		6	3	580	63.3	5.45
1.9155	0.0121479	1.859	A0A3B6SKZ0	Uncharacterized protein		9	2	339	37	7.64
3.50905	0.000309708	1.85821	A0A3B6KFR1	DUF3700 domain-containing protein		59	7	236	25	4.92
2.27317	0.00533126	1.85697	A0A3B6HV04	Ribosomal_TL5_C domain-containing protein		19	3	237	25.5	9.35
3.30551	0.000494869	1.85681	A0A3B5Y3D7	Uncharacterized protein		27	4	165	17.7	4.97
2.05784	0.00875314	1.85606	A0A3B6KHD7	PDZ domain-containing protein		29	2	213	22.9	5.64
2.98348	0.00103878	1.85577	A0A3B6CHN3	Protein kinase domain-containing protein		16	6	394	44.2	6.6
1.52038	0.0301734	1.85373	A0A3B6HWX8	TOG domain-containing protein		23	11	1110	120.8	5.05
3.15904	0.000693365	1.85158	A0A077S3V2	Aspartate aminotransferase (EC 2.6.1.1)	TRAES_3BF023000050CFD_c1	66	22	454	49.5	8.22	metabolic process		catalytic activity
2.29947	0.00501801	1.85045	A0A3B6KQU7	Uncharacterized protein		28	2	149	15.2	9.33
3.19624	0.000636445	1.85009	A0A3B5YYS5	Pyruvate, phosphate dikinase (EC 2.7.9.1)		44	27	939	101.9	5.96
2.41406	0.00385425	1.84818	A0A3B6MWC1	Pep3_Vps18 domain-containing protein		10	5	992	111.5	5.66
3.63388	0.00023234	1.83482	A0A3B6K9H6	dUTPase domain-containing protein		16	2	222	22.7	9.63
2.47827	0.00332453	1.8319	A0A3B6UC51	C2 domain-containing protein		14	3	282	31.1	8.35
4.69347	2.02551e-05	1.83128	D8LAL9	Hydroquinone glucosyltransferase, putative, expressed	HGT_1 TAA_ctg0011b.00250.1	18	6	493	52.4	5.74	metabolic process		catalytic activity
2.32651	0.00471512	1.83048	A0A3B6AYW7	Protein kinase domain-containing protein		5	3	1068	114.1	5.81
2.16664	0.00681338	1.83025	A0A3B6LT94	Protein kinase domain-containing protein		8	3	562	62.1	6.93
2.00815	0.00981399	1.82666	A0A3B6TF52	Structural maintenance of chromosomes protein		11	9	1222	139.5	7.71
3.89886	0.000126223	1.82558	A0A3B6SV41	Phospholipase D (EC 3.1.4.4)		26	12	826	92.1	6.73
1.51839	0.0303115	1.82253	Q5UHH8	0.19 dimeric alpha-amylase inhibitor (Fragment)		81	7	124	13.2	6.01	regulation of biological process		enzyme regulator activity
4.05515	8.80745e-05	1.816	W5GQY7	OTU domain-containing protein		22	3	208	23.2	5.17
2.97127	0.0010684	1.81133	A0A3B5ZXI9	Pyruvate, phosphate dikinase (EC 2.7.9.1)		42	26	939	101.8	5.91
4.92506	1.18834e-05	1.80917	A0A077RVJ6	PB1 domain-containing protein	TRAES_3BF052000020CFD_c1	26	10	716	76.3	5.5			protein binding
4.67611	2.10808e-05	1.80587	A0A077RTQ6	Protein farnesyltransferase subunit beta (FTase-beta) (EC 2.5.1.58)	TRAES_3BF075400020CFD_c1	7	3	488	53	6	metabolic process;regulation of biological process		catalytic activity
2.75603	0.00175374	1.79798	A0A3B6C2B3	AAI domain-containing protein		21	2	178	17	8.48
1.40644	0.039225	1.79662	A0A3B6B0H1	RRF domain-containing protein		24	4	260	27.8	9.89
2.54089	0.00287815	1.79527	A0A3B6KLQ9	Glycosyltransferase (EC 2.4.1.-)		33	8	473	50.4	6.21
1.36563	0.0430893	1.79319	A0A3B6INN4	Zeta_toxin domain-containing protein		16	5	566	62.5	7.55
2.46313	0.0034425	1.79189	A0A3B6QF30	tRNA (guanine(37)-N1)-methyltransferase (EC 2.1.1.228) (M1G-methyltransferase) (tRNA [GM37] methyltransferase) (tRNA methyltransferase 5 homolog)		7	2	484	54.9	6.15
1.59119	0.0256334	1.78875	A0A3B6LMS6	Gamma-tubulin complex component		6	2	825	92.1	7.01
3.56296	0.000273551	1.78849	A0A3B6B1G3	Protoporphyrinogen oxidase (EC 1.3.3.4)		21	6	539	58.4	9.22
1.34851	0.0448215	1.78489	E6Y3A2	Putative translation initiation factor	pTIF TRAES_3BF034700020CFD_c1	48	2	115	12.6	8.78	metabolic process		RNA binding
1.73457	0.018426	1.78348	A0A3B6SGP9	Uncharacterized protein		17	4	435	45.9	6.92
4.9818	1.0428e-05	1.7825	A0A3B6SD29	Sucrose synthase (EC 2.4.1.13)		64	41	808	92.3	6.14
1.64887	0.0224456	1.78091	A0A3B6H2Z1	Uncharacterized protein		13	2	179	20.2	6.02
1.61043	0.0245229	1.77756	A0A077RSJ4	Uncharacterized protein	TRAES_3BF021900050CFD_c1 TRAES_3BF022000010CFD_c1	38	18	802	87.4	4.53
1.69951	0.0199752	1.7733	A0A3B6ERF7	Uncharacterized protein		24	4	321	33.3	5.62
1.67472	0.0211484	1.76935	A0A3B6ML71	Non-specific serine/threonine protein kinase (EC 2.7.11.1)		6	2	558	63.9	6
2.69892	0.00200021	1.76676	A0A2P1E8S5	Fructose-bisphosphate aldolase (EC 4.1.2.13)	FBA16	77	23	358	38.9	7.61
2.64761	0.00225108	1.76217	A0A3B6EDU5	Importin N-terminal domain-containing protein		43	24	981	108.1	5.35
3.06684	0.000857353	1.76125	A0A3B5ZN99	Glucose-6-phosphate isomerase (EC 5.3.1.9)		54	18	567	62.2	7.44
1.48587	0.0326686	1.76075	A0A3B6E987	Eukaryotic translation initiation factor 3 subunit A (eIF3a) (Eukaryotic translation initiation factor 3 subunit 10)		40	31	1011	116.9	9.33
2.54978	0.00281983	1.76055	A0A3B6BY66	Lipoyl-binding domain-containing protein		45	14	427	46.5	8
1.33326	0.0464236	1.76026	P27806	Histone H1		16	3	238	24.2	10.8	cell organization and biogenesis	chromosome;nucleus	DNA binding
3.234	0.000583448	1.75585	A0A3B6B0R2	Uncharacterized protein		39	12	503	54.9	5
3.85787	0.000138716	1.75169	A0A3B6D7U8	Uncharacterized protein		9	2	156	17.4	5.33
3.02368	0.000946939	1.74058	A0A3B6SNV9	Peroxidase (EC 1.11.1.7)		35	7	324	34.9	8.02
2.43411	0.00368039	1.73919	A0A1D5UFU5	ATP-dependent Clp protease proteolytic subunit (EC 3.4.21.92)	CAMPLR22A2D_LOCUS3755	22	3	300	31.9	7.62	metabolic process	membrane;mitochondrion	catalytic activity;metal ion binding
4.17665	6.6581e-05	1.73575	A0A3B6TFE8	MSP domain-containing protein		24	3	238	25.7	8.03
3.60594	0.000247778	1.73497	A0A3B5Y470	Usp domain-containing protein		48	9	267	28	5.6
2.76271	0.00172701	1.73453	A0A3B6JLT1	Uncharacterized protein		22	3	204	22.2	8.78
1.80265	0.0157527	1.73331	A0A3B6SG12	TOG domain-containing protein		15	3	371	39.7	5.31
2.78666	0.00163433	1.73073	A0A3B5ZU86	J domain-containing protein		12	3	540	59.9	7.12
1.63088	0.0233949	1.73034	A0A3B6FQ67	HTH arsR-type domain-containing protein		3	4	2682	302.8	7.99
1.30159	0.0499354	1.72982	A0A3B6EHK2	Uncharacterized protein		14	3	319	35.1	8.7
3.01791	0.000959597	1.72067	A0A3B6HRA4	TENA_THI-4 domain-containing protein		19	2	221	24.8	4.86
1.92855	0.0117882	1.7193	A0A3B6SG74	Uncharacterized protein		21	4	428	44.6	4.49
2.40525	0.00393327	1.71505	A0A3B6B3A4	Uncharacterized protein		30	10	391	43.4	7.46
2.52592	0.00297906	1.7142	A0A3B5YSM9	Uncharacterized protein		17	3	408	44.5	6.98
4.06506	8.60873e-05	1.71211	A0A3B6PIS8	Uncharacterized protein		18	12	1036	116.3	4.78
3.95226	0.000111619	1.71078	Q75QN8	Cold shock domain protein 3	WCSP3	48	5	231	21.5	6.1	regulation of biological process		DNA binding;metal ion binding
3.20326	0.000626236	1.70991	A0A3B5ZN33	Phospholipase D (EC 3.1.4.4)		19	8	827	91.9	6.46
1.92072	0.0120027	1.70816	A0A3B6RQZ1	AAI domain-containing protein		29	3	133	13.6	8.13
2.95338	0.00111333	1.70781	A0A3B5Z4B3	TMF_TATA_bd domain-containing protein		6	5	1029	114.7	4.79
2.40345	0.00394954	1.70213	A0A3B6I7C6	Uncharacterized protein		18	2	206	23.2	9.7
2.86888	0.00135245	1.69716	A0A3B6JLN2	Uncharacterized protein		15	3	387	42.6	5.16
3.58129	0.000262247	1.69494	A0A3B6RKH6	PCI domain-containing protein		39	9	425	47.4	6.16
3.37513	0.000421568	1.69465	A0A3B6KID1	Uncharacterized protein		16	3	322	36	6.4
2.04998	0.00891302	1.68844	A0A3B6NIU6	Uncharacterized protein		3	2	1024	115.9	5.86
3.00979	0.0009777	1.68683	W5C305	Uncharacterized protein	CAMPLR22A2D_LOCUS2334	26	4	296	33	9.54
2.28023	0.00524528	1.68647	A0A3B6HZY0	Uncharacterized protein		66	28	586	61.4	5.39
1.87093	0.0134607	1.68382	A0A3B6GZ62	AA_TRNA_LIGASE_II domain-containing protein		51	19	505	57.4	6.48
1.58206	0.0261784	1.68185	A0A3B5ZNF2	HDAC_interact domain-containing protein		4	3	1337	150.4	5.94
2.01149	0.00973883	1.68148	A0A3B6TR55	PABS domain-containing protein		61	11	324	35.4	5.1
1.98644	0.0103171	1.67752	A0A7H4LP84			23	4	241	25.7	8.27
2.01314	0.00970189	1.6775	A0A3B6LV31	rRNA N-glycosidase (EC 3.2.2.22)		37	6	275	29.6	9.74
2.34924	0.00447462	1.67294	A0A3B6AX48	Uncharacterized protein		4	4	1395	152.7	4.46
2.87058	0.00134717	1.67078	A0A3B6PMA8	BHLH domain-containing protein		10	2	303	31.7	7.64
2.44627	0.0035787	1.66639	A0A3B6QK61	Uncharacterized protein		10	3	469	51.9	10.01
2.3379	0.00459308	1.66461	A0A3B6B6M7	Adenosylhomocysteinase (EC 3.3.1.1)		74	26	481	52.8	5.9
1.87101	0.0134583	1.66331	A0A3B6JGL1	Uncharacterized protein		5	3	1021	114.4	8.06
3.1602	0.000691514	1.65809	A0A3B6ING4	Alcohol dehydrogenase ADH1D		71	17	377	40.8	6.46
2.3126	0.00486857	1.65722	A0A3B6PQ29	Uncharacterized protein		10	2	275	28.2	10.13
1.54361	0.0286018	1.65577	A0A3B6NP49	Uncharacterized protein		6	2	744	82	6.19
2.91421	0.0012184	1.65089	A0A3B5XVK4	Germin-like protein		11	2	255	26.5	8.46
5.39643	4.01392e-06	1.64801	A0A3B6FUI5	Usp domain-containing protein		57	10	264	27.8	5.19
3.02955	0.000934225	1.64288	A0A3B6QEH8	Uncharacterized protein		78	14	291	30.4	6.37
1.34218	0.0454799	1.63907	A0A3B6TSS3	WD_REPEATS_REGION domain-containing protein		9	3	485	53.7	8.4
2.76082	0.00173453	1.63529	A0A3B6GZB9	Small ubiquitin-related modifier (SUMO)		58	5	101	11.1	5.27
3.78347	0.000164639	1.63487	A0A3B6LWF0	Dihydrolipoamide acetyltransferase component of pyruvate dehydrogenase complex (EC 2.3.1.-)		39	13	475	48.8	8.91
3.371	0.0004256	1.63245	A0A3B5YWS4	Uncharacterized protein		29	6	296	30.4	9.54
1.74823	0.0178556	1.62779	A0A3B6TMH9	Uncharacterized protein		35	6	197	21.4	6.54
1.9999	0.0100022	1.62732	Q56TP0	Xyloglucan endotransglucosylase/hydrolase (EC 2.4.1.207)		8	2	287	31.8	8.88	cell organization and biogenesis;metabolic process	extracellular	catalytic activity
1.6451	0.0226412	1.62671	A0A3B5ZS60	DUF1681 domain-containing protein		39	6	280	30.1	6
3.21927	0.000603568	1.62545	A0A3B6QJ85	Uncharacterized protein		12	3	460	51.3	9.07
1.33194	0.0465649	1.62293	A0A3B6CD34	FMN hydroxy acid dehydrogenase domain-containing protein		35	8	369	40.7	7.46
3.53438	0.000292158	1.61919	A0A3B6AY64	Protein kinase domain-containing protein		7	3	692	76	7.42
2.39195	0.00405558	1.61789	A0A3B6PUE9	Fe2OG dioxygenase domain-containing protein		22	4	322	35	7.91
3.03633	0.000919746	1.61727	A0A3B5Z0I8	Uncharacterized protein		54	6	167	17.8	5.06
1.81871	0.0151807	1.61213	A0A3B6TL70	Uncharacterized protein		12	3	481	51.8	5.48
1.73817	0.0182737	1.60851	A0A3B6N0X4	Protein kinase domain-containing protein		28	6	368	40.6	6.67
1.94497	0.011351	1.60772	A0A3B6SGJ6	LIM zinc-binding domain-containing protein		36	18	1192	127.8	4.55
3.53402	0.000292404	1.60693	A0A3B6TI06	Uncharacterized protein		18	5	473	50.2	6.89
4.56101	2.74785e-05	1.6054	A0A3B5ZRB4	Protein kinase domain-containing protein		45	11	362	39.4	8.22
1.49681	0.0318556	1.60502	A0A3B6ESJ7	Uncharacterized protein		9	3	476	54.8	5.55
1.36071	0.0435806	1.6041	Q41518	Single-stranded nucleic acid binding protein	whGRP-1	63	5	167	16.2	5.25			RNA binding
2.40546	0.00393132	1.60278	A0A3B5Y201	Protein kinase domain-containing protein		4	2	605	66.7	7.39
1.98372	0.010382	1.60217	A0A3B6U3F1	Fe2OG dioxygenase domain-containing protein		45	9	388	42.5	6.25
2.75816	0.00174517	1.60203	A0A3B6MLN0	t-SNARE coiled-coil homology domain-containing protein		9	2	258	28.9	7.42
2.31976	0.004789	1.60142	A0A3B6C540	GYF domain-containing protein		6	6	1704	185.2	6.8
1.32093	0.0477604	1.59793	A0A3B6GQP5	Uncharacterized protein		41	8	262	28.3	6.52
4.26654	5.41332e-05	1.59719	A0A3B6CH98	Peroxidase (EC 1.11.1.7)		46	10	341	36.6	6.29
3.15446	0.000700711	1.59629	A0A3B6LIH3	Uncharacterized protein		31	8	539	57.9	6.3
1.97687	0.0105469	1.59398	A0A3B5YY75	Inositol-tetrakisphosphate 1-kinase (EC 2.7.1.134)		44	8	353	38.9	6.42
1.91196	0.0122472	1.58567	A0A3B6IT08	YTH domain-containing protein		5	2	681	73.2	6.38
2.43989	0.00363174	1.58278	A0A3B6SFU0	Uncharacterized protein		7	2	396	44.5	6.24
3.28803	0.000515194	1.58238	A0A3B6H1U9	OMPdecase domain-containing protein		51	15	473	50.5	7.06
1.76657	0.017117	1.57896	A0A3B6LL77	Glycosyltransferase (EC 2.4.1.-)		12	2	491	52.9	5.17
3.52257	0.000300216	1.57887	A0A3B6TKX8	Lipase_GDSL domain-containing protein		32	7	368	39.2	7.72
2.41979	0.00380374	1.57632	A4ZIZ6	Monomeric alpha-amylase inhibitor (Fragment)		60	6	121	13.1	7.43	regulation of biological process		enzyme regulator activity
2.85731	0.00138895	1.57575	A0A3B6C3I1	Uncharacterized protein		21	9	678	75.1	4.73
1.91923	0.0120439	1.57413	A0A3B6JRM0	FKS1_dom1 domain-containing protein		6	8	1904	216.8	7.99
2.27524	0.00530589	1.57095	A0A3B6IS82	VOC domain-containing protein		38	4	138	15.3	5.91
3.6067	0.000247343	1.56856	A0A3B6KSY1	Uncharacterized protein		29	7	491	53.2	4.94
2.80719	0.00155889	1.56493	A0A3B6KCP1	AB hydrolase-1 domain-containing protein		36	7	336	37.1	5.53
3.40515	0.000393414	1.56437	A0A3B6RFD2	Acyl carrier protein		12	2	137	14.6	4.82
2.15718	0.00696339	1.56115	A0A3B5Z228	GLOBIN domain-containing protein		37	4	158	17.4	6.55
1.35996	0.043656	1.55896	A0A3B6KCM5	Sulfurtransferase		43	10	332	35.8	5.92
3.84206	0.00014386	1.55345	A0A3B6TNH7	C-CAP/cofactor C-like domain-containing protein		23	7	573	61.8	5.45
2.41827	0.00381705	1.55023	A0A1D5UL37	Peroxidase (EC 1.11.1.7)	CAMPLR22A2D_LOCUS5724	46	9	344	35.7	5.94	metabolic process;response to stimulus	extracellular	antioxidant activity;catalytic activity;metal ion binding
2.02377	0.0094673	1.54994	A0A3B6LY37	Uncharacterized protein		29	2	161	17.6	10.17
1.88943	0.0128995	1.54903	A0A3B6GVF8	Uncharacterized protein		5	2	730	75.3	7.97
2.28094	0.00523667	1.54832	W5CRV4	Glycosyltransferase (EC 2.4.1.-)	TRAES_3BF026500120CFD_c1	12	4	477	51.7	5.43	metabolic process		catalytic activity
4.5385	2.89398e-05	1.54576	A0A3B6H2M0	Uncharacterized protein		41	4	68	8	10.14
1.94832	0.0112638	1.5455	A0A3B5XWI1	Uncharacterized protein		44	2	80	9	9.32
2.63698	0.00230683	1.54526	A0A3B6LGU5	Cellulase domain-containing protein		28	8	502	55.5	6.89
2.62197	0.00238795	1.54362	A0A3B6KS89	TOP4c domain-containing protein		11	6	937	103.2	8.6
3.39151	0.000405967	1.54265	A0A3B5Z0X4	Uncharacterized protein		22	4	419	45.5	6.61
2.43184	0.00369965	1.54022	A0A3B6EIN4	ATP synthase subunit beta (EC 7.1.2.2)		70	25	551	58.9	6.24
2.35034	0.00446332	1.53939	A0A3B6GYZ4	Uncharacterized protein		18	2	187	19.8	8.54
1.60217	0.0249939	1.53425	P16159	Alpha-amylase/trypsin inhibitor CM16 (Chloroform/methanol-soluble protein CM16)		17	2	143	15.8	5.41	regulation of biological process	extracellular	enzyme regulator activity
1.6598	0.0218875	1.5341	A0A3B6HQ66	Tho1_MOS11_C domain-containing protein		13	2	172	17.9	9.33
2.59539	0.00253871	1.53311	A0A3B6LNG6	Uncharacterized protein		17	3	236	26.1	6.09
1.90416	0.0124693	1.53017	A0A3B6PSX9	Uncharacterized protein		2	3	2184	244.6	5.43
5.37101	4.25592e-06	1.52995	A0A3B6KPG3	Diphosphomevalonate decarboxylase (EC 4.1.1.33)		35	8	420	45.9	6.38
3.56223	0.000274014	1.52912	A0A3B6HUX8	PKS_AT domain-containing protein		46	11	376	39.8	8.38
1.38487	0.0412223	1.52845	A0A3B6RIM0	Methionine aminopeptidase 2 (MAP 2) (MetAP 2) (EC 3.4.11.18) (Peptidase M)		20	5	448	49.5	6.15
3.88385	0.000130663	1.52765	A0A3B6TBV3	Uncharacterized protein		19	8	714	79.5	5
2.83468	0.00146326	1.52731	A0A3B6RJY9	Myb-like domain-containing protein		21	3	311	32.9	7.39
3.699	0.000199984	1.52597	A0A3B6IM98	Uncharacterized protein		38	11	427	45.3	5.22
1.87916	0.0132081	1.52444	C4IXS2	Inositol-1-monophosphatase (EC 3.1.3.25)		33	6	267	28.9	5.68	metabolic process;response to stimulus	cytosol;membrane	catalytic activity;metal ion binding
3.59194	0.000255894	1.52305	A0A3B6C8Z7	Chitin-binding type-1 domain-containing protein		32	7	275	28.8	8.5
1.3378	0.0459414	1.52186	A0A3B6DLQ2	Uncharacterized protein		21	2	189	22.1	6.71
2.14921	0.0070924	1.52159	A0A3B6Q8W4	Uncharacterized protein		41	17	598	63.6	5.78
1.61681	0.0241652	1.52082	A0A3B6CHQ1	Uncharacterized protein		19	4	509	51.9	6.46
3.00254	0.000994174	1.51852	A0A3B6TYD9	Uncharacterized protein		36	26	1156	130.7	6.37
1.89057	0.0128655	1.51678	A0A3B6MMX1	Eukaryotic translation initiation factor 5A (eIF-5A)		18	3	160	17.5	5.99
2.95856	0.00110012	1.51508	A0A3B6RKM9	Uncharacterized protein		12	3	285	31.1	6.71
1.82054	0.0151169	1.51506	A0A3B6A287	Uncharacterized protein		17	6	460	52.2	5.76
3.00537	0.000987703	1.51505	A0A3B6N3H9	Uncharacterized protein		21	9	692	77	6.35
1.65055	0.0223586	1.51441	A0A3B5Y692	DNA replication complex GINS protein PSF2		13	2	202	23.3	7.55
1.86021	0.0137973	1.51093	A0A3B6PNX5	Uncharacterized protein		37	10	441	48.1	5.82
2.53961	0.00288659	1.50502	A0A3B6IJ72	Tubulin beta chain		69	22	445	49.7	4.83
3.08135	0.000829183	1.50432	W5HFJ0	Uncharacterized protein		28	4	122	13.8	9.94	metabolic process	ribosome	structural molecule activity
2.68002	0.00208921	1.50353	A0A3B6PGM5	Protein arginine N-methyltransferase		30	10	651	73.1	5.71
1.52673	0.0297355	1.50246	A0A3B6RAV4	Uncharacterized protein		47	9	247	25.9	8.48
3.09406	0.000805276	1.50223	A0A3B6ATM1	Peroxidase (EC 1.11.1.7)		20	5	335	35.5	9.04
2.59577	0.00253645	1.50189	A0A3B6KUH5	Uncharacterized protein		16	3	326	36.2	5.11
4.00337	9.92261e-05	1.49868	A0A3B6JE77	Uncharacterized protein		35	2	164	17.1	7.96
2.27371	0.00532461	1.49788	A0A3B5YY55	Uncharacterized protein		22	14	972	109.2	6.46
3.319	0.000479734	1.49749	A0A3B6MVS1	Uncharacterized protein		12	4	602	65.9	6.19
1.97902	0.0104949	1.49239	A0A3B6D9Q8	V-SNARE coiled-coil homology domain-containing protein		11	7	1113	120.6	5.53
2.64668	0.00225589	1.49023	A0A3B6LT53	Uncharacterized protein		6	4	1272	142.7	6.87
2.79244	0.00161273	1.48726	A0A3B6AQ24	Fe2OG dioxygenase domain-containing protein		57	11	373	40.9	5.72
3.54309	0.000286361	1.487	A0A3B6PLI9	Uncharacterized protein		19	7	599	66	8.12
2.3413	0.00455719	1.48258	A0A1D5UJW2	Uncharacterized protein	CAMPLR22A2D_LOCUS4271	30	10	392	43.4	7.15	metabolic process		catalytic activity
1.43412	0.036803	1.47941	A0A3B6IP49	Uncharacterized protein		36	16	601	64.5	7.55
2.26282	0.00545984	1.47746	A0A3B6JRT7	Uncharacterized protein		4	2	847	95.4	9.13
1.75714	0.0174927	1.47654	A0A3B6LM20	Uncharacterized protein		26	5	228	24	4.16
2.46328	0.00344127	1.4761	A0A3B6EMT7	Uncharacterized protein		35	8	439	48.6	6.87
3.09856	0.000796966	1.47277	A0A3B6JH97	Uncharacterized protein		34	12	576	63	5.2
2.0068	0.00984459	1.47114	A0A3B6DL63	Uncharacterized protein		5	2	622	66.7	5.44
1.9971	0.0100671	1.46899	A0A3B5ZUU7	RanBD1 domain-containing protein		19	7	430	45.6	4.96
1.87433	0.0133558	1.46876	A0A3B6SGS8	Pyrophosphate--fructose 6-phosphate 1-phosphotransferase subunit beta (PFP) (EC 2.7.1.90) (6-phosphofructokinase, pyrophosphate dependent) (PPi-PFK) (Pyrophosphate-dependent 6-phosphofructose-1-kinase)	PFP-BETA	73	27	560	60.6	6.2
2.07509	0.00841223	1.46631	W5D5P8	Coatomer subunit beta (Beta-coat protein)	TRAES_3BF058300010CFD_c1	51	34	950	105.3	5.72	transport	cytoplasm;Golgi;membrane	structural molecule activity
1.54576	0.0284603	1.46548	A0A3B6LJI3	WD_REPEATS_REGION domain-containing protein		9	2	442	47.9	5.82
2.463	0.00344346	1.46066	A0A1D6B0F9	Uncharacterized protein		13	3	204	22.4	7.91
4.81181	1.54237e-05	1.45995	A0A3B6B0J6	Uncharacterized protein		25	5	321	34.2	6.09
2.13651	0.00730288	1.45921	A0A3B5YVZ7	Uncharacterized protein		16	6	474	52.3	7.84
1.33044	0.0467267	1.45703	A0A3B6B996	Peroxidase (EC 1.11.1.7)		38	8	352	37.3	5.15
3.23228	0.000585758	1.45312	A0A3B6RKE1	Glyceraldehyde-3-phosphate dehydrogenase (EC 1.2.1.-)		71	17	333	36.2	6.89
2.42531	0.00375566	1.45046	A0A1D6BNE7	Proteasome subunit beta (EC 3.4.25.1)		37	4	204	22.8	5.27	metabolic process	cytoplasm;nucleus;proteasome	catalytic activity
1.48109	0.0330298	1.4496	A0A3B6PTM7	Glyco_transf_20 domain-containing protein		19	11	845	93.6	6.92
4.67503	2.11335e-05	1.44384	A0A3B6LJK2	Pyruvate kinase (EC 2.7.1.40)		53	21	527	57.4	6.95
4.69551	2.01601e-05	1.44159	A0A3B6LJ71	Uncharacterized protein		28	5	325	33.9	4.91
2.44717	0.00357133	1.44092	A0A3B6C526	Exo84_C domain-containing protein		11	6	725	79.1	5.36
3.64369	0.000227147	1.43857	A0A3B6SDH3	Uncharacterized protein		43	3	124	13	8.78
1.93671	0.0115689	1.4383	A0A7H4LFQ6			51	4	134	13.9	10.23
1.93809	0.0115322	1.4372	A0A3B6HXQ9	C2 domain-containing protein		14	2	329	33.1	6.61
3.75727	0.000174878	1.42786	A0A3B5Y3M4	Clat_adaptor_s domain-containing protein		27	4	177	19.3	4.65
3.14881	0.000709885	1.42622	A0A3B6QER2	Uncharacterized protein		19	2	231	25.3	9.51
2.6159	0.00242157	1.42605	A0A3B6PUE8	Ribonucleoside-diphosphate reductase (EC 1.17.4.1)		23	12	812	91.3	6.95
2.80359	0.00157185	1.42457	A0A3B6EJB8	Uncharacterized protein		9	4	675	75.9	5.15
2.48464	0.00327615	1.42414	A0A3B6EBN5	BOWMAN_BIRK domain-containing protein		10	2	217	23.3	6.62
2.32154	0.00476939	1.41862	A0A3B6LJD4	DUF3700 domain-containing protein		59	7	236	25	5.01
2.14592	0.0071462	1.41742	A0A3B6TK99	MSP domain-containing protein		23	4	243	26.8	8.22
1.38018	0.0416692	1.41615	A0A3B6HYW3	Nascent polypeptide-associated complex subunit beta		66	8	157	17.3	8.85
2.44604	0.00358061	1.41277	A0A3B6KE82	Uncharacterized protein		9	7	877	98.7	8.92
4.11399	7.69151e-05	1.41191	A0A3B6NVI4	Glyco_transf_20 domain-containing protein		19	11	848	93.9	6.92
3.91797	0.000120789	1.40832	A0A3B6NQQ5	Glyceraldehyde-3-phosphate dehydrogenase (EC 1.2.1.-)		77	21	337	36.6	7.49
3.39762	0.000400296	1.408	A0A3B6PM55	Uncharacterized protein		16	3	350	38.4	5.19
3.27681	0.000528671	1.40629	A0A3B5YTN4	Usp domain-containing protein		77	7	166	17.8	6.18
1.8813	0.0131432	1.40627	A0A3B6RNW8	Uncharacterized protein		36	26	1171	132.5	6.35
1.66007	0.021874	1.40626	W5EH10	Ribonucloprotein		58	3	128	13.9	7.12			RNA binding
1.89985	0.0125937	1.40598	A0A3B6ARB9	Dihydrolipoamide acetyltransferase component of pyruvate dehydrogenase complex (EC 2.3.1.-)		13	3	511	55.3	7.2
1.52989	0.0295194	1.40565	A0A3B6GYI4	Glyco_hydro_18 domain-containing protein		12	2	297	31.4	5.19
1.88702	0.0129713	1.40439	A0A3B6LT76	YTH domain-containing protein		7	2	604	65.5	7.99
1.43679	0.0365774	1.40089	A0A3B6DFE2	Small nuclear ribonucleoprotein-associated protein		15	3	265	28	11.3
3.04396	0.00090374	1.40048	A0A3B5Z0Q3	Uncharacterized protein		15	4	473	49.7	7.34
1.36308	0.0433433	1.39844	A0A3B6MJX3	RRM domain-containing protein		58	5	174	16.9	5.54
3.52672	0.000297355	1.39393	A0A3B6AV40	Uncharacterized protein		34	11	453	48	5
1.54461	0.028536	1.39199	A0A3B6GXB5	Glyco_hydro_18 domain-containing protein		15	2	306	31.8	7.96
3.06809	0.00085489	1.39187	A0A3B6KL86	Uncharacterized protein		29	5	325	35.6	7.61
3.15874	0.000693836	1.38635	A0A3B6SGY8	RING-type domain-containing protein		17	3	491	54.9	7.88
2.20161	0.00628618	1.38263	A0A3B6EF06	WRKY domain-containing protein		6	2	571	59.6	6.76
3.0674	0.000856242	1.38178	A0A3B6C1B8	Uncharacterized protein		20	3	314	34.8	9.19
1.86518	0.0136403	1.38112	A9U8F9	Alcohol dehydrogenase ADH3D		56	14	379	41.1	6.46	metabolic process		catalytic activity;metal ion binding
3.67701	0.000210373	1.37554	A0A1D5WMG7	Uncharacterized protein		10	2	247	26.5	9.42		mitochondrion;organelle lumen
1.35918	0.0437336	1.37501	A0A3B6I463	PALP domain-containing protein		15	2	303	32	5.07
3.24205	0.000572733	1.37427	A0A3B6H1U7	Uricase (EC 1.7.3.3) (Urate oxidase)		45	8	307	34.3	7.94
3.43058	0.000371038	1.37398	A0A3B6SSU6	Uncharacterized protein		46	9	267	29.9	8.07
1.80348	0.0157223	1.37304	W5BNF8	Uncharacterized protein	CAMPLR22A2D_LOCUS1446	16	3	262	28.2	5.39	metabolic process	cytoplasm;nucleus	catalytic activity
4.27764	5.27667e-05	1.37218	A0A3B6JLZ2	Fe2OG dioxygenase domain-containing protein		21	3	315	34.4	5.25
1.62519	0.0237034	1.36881	A0A3B6MTU9	Uncharacterized protein		20	15	1416	151.3	4.68
2.51499	0.00305496	1.36831	A0A3B6EDE3	Uncharacterized protein		31	3	177	18.9	7.66
4.569	2.69771e-05	1.36667	A0A3B6JF73	Inositol hexakisphosphate and diphosphoinositol-pentakisphosphate kinase (EC 2.7.4.21) (EC 2.7.4.24)		3	2	1046	118.5	6.92
1.36287	0.0433638	1.36629	A0A158N6J5	ATP-dependent Clp protease proteolytic subunit		26	3	296	31.7	5.3	cell organization and biogenesis;metabolic process;regulation of biological process	membrane	catalytic activity
3.78232	0.000165074	1.36283	A0A3B6C0G0	NAD(P)-bd_dom domain-containing protein		48	14	440	48.3	9
2.29845	0.0050298	1.36103	A0A3B6ES95	Uncharacterized protein		39	7	331	34.7	6.35
3.78549	0.000163874	1.35859	A0A3B6HPL8	VWFA domain-containing protein		32	8	401	42.2	4.54
4.4742	3.35582e-05	1.35664	A0A3B6IMJ1	Uncharacterized protein		55	4	131	13.5	9.92
1.30439	0.0496147	1.35449	A0A3B6PGX8	Uncharacterized protein		12	8	852	93	8
1.81297	0.0153827	1.35358	P12299	Glucose-1-phosphate adenylyltransferase large subunit, chloroplastic/amyloplastic (EC 2.7.7.27) (ADP-glucose pyrophosphorylase) (ADP-glucose synthase) (AGPase S) (Alpha-D-glucose-1-phosphate adenyl transferase)	AGP-L AGA.3	18	5	522	57.8	6.55	metabolic process		catalytic activity;nucleotide binding
2.43882	0.00364065	1.35188	A0A3B6JHY1	Uncharacterized protein		27	7	416	44.2	8.27
1.76602	0.0171388	1.3513	A0A3B6RLE3	Uncharacterized protein		6	7	2263	247.2	5.27
2.5194	0.00302415	1.35113	A0A3B6H3P5	Peroxidase (EC 1.11.1.7)		41	11	358	37.7	7.11
3.17147	0.000673804	1.35088	A0A3B6RLQ1	Uncharacterized protein		20	5	408	44.2	9.39
1.75483	0.0175863	1.35056	A0A3B6AS20	Uncharacterized protein		23	4	301	32.7	7.44
2.07378	0.0084377	1.35051	A0A3B6PR53	Uncharacterized protein		16	4	447	49.7	9.45
3.29942	0.000501857	1.34732	A0A3B6HSU4	Uncharacterized protein		47	13	423	46.6	5.81
1.59778	0.0252476	1.34591	A0A1D6CZK2	Uncharacterized protein		26	2	87	9.7	9.55		membrane
2.53548	0.00291423	1.34536	A0A3B5ZS79	Uncharacterized protein		20	11	964	107.3	5.47
1.86712	0.0135795	1.34	A0A3B6TRK4	Uncharacterized protein		4	3	1000	109	6.35
1.54637	0.0284202	1.3387	A0A7H4LAM2			74	17	369	40.7	6.54
3.66821	0.00021468	1.3371	A0A3B6MZQ3	Uncharacterized protein		45	12	244	28.3	10.01
3.72451	0.000188578	1.3362	A0A3B6NKH5	Uncharacterized protein		75	28	442	50	5.69
2.80908	0.00155209	1.3362	A0A3B6TTV5	Uncharacterized protein		20	7	657	71.6	6.87
3.6918	0.000203328	1.33618	A0A3B6MRX0	Uncharacterized protein		49	7	251	26	7.33
5.0959	8.01856e-06	1.33503	A0A3B6NNM8	C-CAP/cofactor C-like domain-containing protein		22	7	568	61.7	5.73
1.43311	0.0368882	1.33481	A0A3B6EQZ5	DNA polymerase (EC 2.7.7.7)		5	4	1539	170.3	6.89
2.4137	0.00385743	1.3339	Q75QN9	Cold shock domain protein 2 (Putative glycine-rich protein)	WCSP2 GRP	51	5	205	19.2	5.91	regulation of biological process		DNA binding;metal ion binding
2.21547	0.00608872	1.33241	A0A3B6D9C9	MHD domain-containing protein		25	9	451	50.4	6.58
1.71596	0.0192329	1.33198	A0A3B5Y5Q7	Uncharacterized protein		19	2	114	12.8	7.27
1.95775	0.0110218	1.33195	A0A3B6B6I4	WD_REPEATS_REGION domain-containing protein		60	12	317	33.9	5.62
2.07994	0.00831887	1.3296	A0A3B6C8C5	Uncharacterized protein		29	6	311	33	6.42
1.89526	0.0127273	1.32846	A0A3B6TY95	Uncharacterized protein		18	3	423	45.7	9
1.72477	0.0188463	1.32761	A0A3B6ESY7	RING-type domain-containing protein		12	3	382	41.9	6.47
2.85244	0.00140463	1.32747	A0A1D5VD11	Fructose-bisphosphate aldolase (EC 4.1.2.13)	FBA11	77	23	358	38.9	6.79	metabolic process		catalytic activity
2.52059	0.00301586	1.32692	A0A3B6TDG9	CBFD_NFYB_HMF domain-containing protein		16	3	199	21.5	5.81
1.66309	0.0217225	1.3242	A0A3B6EQU7	Uricase (EC 1.7.3.3) (Urate oxidase)		32	6	307	34.4	8.25
4.21064	6.15689e-05	1.32333	W5EUY8	Uncharacterized protein		30	5	218	25.4	9.09	transport	membrane
2.08806	0.00816479	1.32127	A0A341VDM8	Protein phosphatase 2A structural subunit		66	26	583	65	5.06
3.14189	0.000721288	1.31612	A0A3B5ZZN9	Ribosomal_L28e domain-containing protein		39	4	147	16.6	10.32
3.34908	0.00044763	1.31091	W5BSX7	S10_plectin domain-containing protein	CAMPLR22A2D_LOCUS3027	48	7	188	20.4	9.79
2.78543	0.00163897	1.31076	A0A3B6QF80	Uncharacterized protein		19	13	991	109.9	6.4
2.17399	0.00669898	1.30856	A0A3B6LX57	Uncharacterized protein		14	2	128	13.5	5.07
1.5683	0.027021	1.30762	A0A3B6KJ77	DOMON domain-containing protein		21	4	264	26.1	9.13
2.29248	0.00509937	1.30682	A0A3B6LL04	Uncharacterized protein		4	3	819	86.6	5.99
3.82893	0.000148277	1.30651	A0A1D6SDJ6	Uncharacterized protein		22	5	360	39.8	7.08			protein binding
1.93772	0.011542	1.30647	A0A3B6KAJ8	RRM domain-containing protein		63	5	170	16.7	5.25
3.04707	0.000897282	1.30468	A0A3B6AWS8	Uncharacterized protein		8	2	299	34.2	8.62
1.41262	0.0386703	1.30047	A0A3B6RL96	Bms1-type G domain-containing protein		8	4	787	88.1	7.4
2.39767	0.00400247	1.29811	A0A3B6JPB4	Uncharacterized protein		26	8	527	55.1	4.98
2.87199	0.00134281	1.29744	A0A3B6JIU3	AB hydrolase-1 domain-containing protein		45	6	271	29.7	5.11
1.34569	0.0451143	1.2971	A0A3B6AVX5	Succinate--CoA ligase [ADP-forming] subunit alpha, mitochondrial (EC 6.2.1.5) (Succinyl-CoA synthetase subunit alpha) (SCS-alpha)		60	11	330	34.3	8
2.24	0.00575442	1.29652	A0A3B5Y1S1	Uncharacterized protein		51	5	206	19.2	5.91
3.93894	0.000115096	1.29647	A0A6G8MYT7			9	4	865	94	5.86
2.14065	0.00723354	1.29601	A0A3B6MJK8	Bet_v_1 domain-containing protein		19	2	175	19	5.02
2.96257	0.00109001	1.29294	A0A3B6I2X4	Uncharacterized protein		2	2	1291	147.2	5.83
1.85918	0.0138299	1.29169	A0A3B6DJ31	Aminomethyltransferase (EC 2.1.2.10) (Glycine cleavage system T protein)		42	11	414	44.3	8.57
2.08716	0.00818155	1.28778	A0A3B6MUK2	Uncharacterized protein		30	5	204	22.9	7.64
2.22064	0.00601674	1.28473	A0A3B6SNB2	WD_REPEATS_REGION domain-containing protein		23	5	346	38.4	7.8
3.15565	0.000698791	1.27848	A0A3B6ETK4	MGS domain-containing protein		28	11	598	64.8	6.86
2.43748	0.00365191	1.27662	A0A3B6PUD5	RmlD_sub_bind domain-containing protein		7	2	321	34.6	6.32
1.86899	0.0135211	1.27427	A0A3B6JJE1	Uncharacterized protein		33	7	233	25.5	7.33
3.3709	0.000425693	1.2735	A0A3B6TSC7	Amino_oxidase domain-containing protein		9	4	498	55.9	6.42
2.25955	0.00550116	1.27088	A0A3B6S804	Ubiquinone biosynthesis O-methyltransferase, mitochondrial (3-demethylubiquinol 3-O-methyltransferase) (EC 2.1.1.64) (Polyprenyldihydroxybenzoate methyltransferase) (EC 2.1.1.114)	COQ3	15	3	326	35.1	8.34
2.15145	0.00705594	1.27011	A0A3B6HPW4	tRNA (guanine(26)-N(2))-dimethyltransferase (EC 2.1.1.216)		18	7	603	66.5	7.25
3.0499	0.000891453	1.26998	A0A3B5XXP0	Uncharacterized protein		14	2	285	31.3	6.05
3.01847	0.000958353	1.26925	A0A3B6BA14	Peroxidase (EC 1.11.1.7)		41	10	341	35.4	7.64
2.64351	0.00227244	1.26903	A0A3B6IYU5	Uncharacterized protein		8	5	917	103.5	9.2
3.57568	0.000265659	1.26823	A0A3B6LVV3	Uncharacterized protein		32	11	514	55.4	7.01
2.50184	0.00314891	1.26726	A0A1D5UQX6	Uncharacterized protein	CAMPLR22A2D_LOCUS2851	33	4	158	16.6	3.92
2.29592	0.00505918	1.26479	I3RN54	Inorganic pyrophosphotase	IPP1-1	55	7	214	24.3	5.66	metabolic process	cytoplasm	catalytic activity;metal ion binding
2.44081	0.00362405	1.2619	W5AA91	Importin subunit alpha		73	22	534	58.6	5.25	transport	cytoplasm;nucleus	protein binding;transporter activity
1.7819	0.0165235	1.25985	A0A3B6NM00	Uncharacterized protein		8	2	485	53.6	8.41
2.41294	0.00386423	1.25964	A0A3B6QCG2	Uncharacterized protein		2	2	1918	211.6	5.53
3.14337	0.000718835	1.25717	A0A3B6B887	Peroxidase (EC 1.11.1.7)		48	10	341	36.5	5.96
2.45409	0.00351488	1.25302	A0A3B6KR15	DUF2428 domain-containing protein		5	7	2145	239	6.24
2.15144	0.00705606	1.25208	A0A3B6U438	HDAC_interact domain-containing protein		8	6	1317	147.5	5.68
2.91418	0.00121849	1.25078	A0A3B6IQV6	NTP_transferase domain-containing protein		35	8	361	39.3	6.8
4.31383	4.8548e-05	1.25053	A0A3B6QHG3	Elongation factor Tu		36	11	470	50.5	6.28
1.87072	0.0134672	1.25037	A0A3B6TXL0	Uncharacterized protein		23	3	277	30.1	7.4
3.84181	0.000143944	1.25028	A0A3B6ISW3	t-SNARE coiled-coil homology domain-containing protein		18	3	273	30.7	8.84
2.71704	0.00191849	1.24912	A0A3B6CJF7	Peroxidase (EC 1.11.1.7)		52	10	341	35.3	6.54
2.53174	0.00293941	1.24585	A0A3B6IMV7	Uncharacterized protein		66	29	741	80.1	6.64
2.91619	0.00121285	1.24489	A0A1D6CXF2	Proteasome subunit alpha type (EC 3.4.25.1)		38	7	249	27.3	7.43	metabolic process	cytoplasm;nucleus;proteasome	catalytic activity
2.79546	0.00160153	1.24296	A0A3B6QAP5	Proteasome subunit alpha type (EC 3.4.25.1)		53	10	288	31.3	5.43
2.1538	0.00701779	1.2401	A0A3B6RGV2	Uncharacterized protein		10	9	1778	198.4	6.74
2.72014	0.00190485	1.23549	A0A3B6ELC9	TRASH domain-containing protein		12	2	161	18.2	10.58
2.32463	0.0047356	1.23472	A0A080YTZ8	Ubiquitin-fold modifier 1	TRAES_3BF082600110CFD_c1	61	3	99	10.2	9.25
1.47176	0.0337471	1.23427	A0A3B6IRY1	Non-specific serine/threonine protein kinase (EC 2.7.11.1)		14	4	478	54.5	8.19
1.94291	0.0114049	1.23233	A0A1D6RPZ0	S1 motif domain-containing protein	CAMPLR22A2D_LOCUS735	33	9	339	37.9	5.4	metabolic process		RNA binding
2.83842	0.00145072	1.23097	A0A3B6U4M4	Uncharacterized protein		12	3	540	59	7.68
3.14646	0.000713742	1.23053	A0A3B6KBC7	Uncharacterized protein		73	23	446	48	5.55
2.10364	0.0078769	1.22988	A0A3B6RJK5	Uncharacterized protein		15	3	299	31	9.54
1.98929	0.0102497	1.22966	A0A3B6HPL1	Uncharacterized protein		14	3	476	51.5	5.27
5.21227	6.13387e-06	1.22715	A0A3B6U4K5	3-phosphoshikimate 1-carboxyvinyltransferase (EC 2.5.1.19)		43	12	515	54.6	6.92
2.61956	0.00240128	1.22675	A0A3B6QPK9	ETF domain-containing protein		15	2	255	27.6	7.84
3.40068	0.000397487	1.22673	A0A3B6N2S9	AB hydrolase-1 domain-containing protein		30	5	344	37.4	5.94
2.24638	0.00567053	1.22485	A0A3B6IKY0	Uncharacterized protein		50	10	369	39.9	5.17
3.39083	0.000406602	1.2248	A0A3B5YXP8	TFCD_C domain-containing protein		18	11	1268	139.5	5.81
1.82138	0.0150874	1.22401	A0A3B6TND5	Peptidase A1 domain-containing protein		7	2	490	52	6.39
3.85899	0.00013836	1.22326	A0A3B6DGR0	C2 domain-containing protein		71	6	144	15.7	4.09
1.3245	0.0473691	1.2217	A0A3B6SCN4	Uncharacterized protein		8	6	1262	138.3	6.92
1.96517	0.0108349	1.2212	A0A3B6HSK0	S1 motif domain-containing protein		24	7	339	38.2	5.39
2.06369	0.00863596	1.22061	A0A3B6RKA3	BcrAD_BadFG domain-containing protein		26	5	379	39.5	5.1
2.52225	0.00300434	1.21924	A0A3B5ZT87	Uncharacterized protein		14	5	605	67	6.71
4.38473	4.12356e-05	1.21773	A0A3B6IUA1	PCI domain-containing protein		43	11	399	44.9	5.2
2.88837	0.0012931	1.21729	Q9ZRB0	Tubulin beta-3 chain (Beta-3-tubulin)	TUBB3	65	24	445	49.9	4.77	cell organization and biogenesis	cytoplasm;cytoskeleton	catalytic activity;nucleotide binding;structural molecule activity
2.36949	0.00427081	1.21679	A0A3B6LWH8	TOG domain-containing protein		22	5	381	40.9	5.16
1.91236	0.012236	1.21676	B2ZGL4	Plastid acetyl-CoA carboxylase	Acc-1 CAMPLR22A2D_LOCUS565	51	75	2311	254.8	6.16	metabolic process		catalytic activity;metal ion binding;nucleotide binding
3.00718	0.000983614	1.21617	A0A3B6EJH0	Uncharacterized protein		37	4	255	26.8	4.74
2.09551	0.0080259	1.2161	A0A3B6T7F5	Protein transport protein sec16		3	3	1581	167.8	5.78
3.77384	0.000168331	1.21373	A0A3B6B8H6	Uncharacterized protein		28	12	605	65.8	5.17
2.00048	0.00998897	1.21184	A0A3B6MWE0	Sulfotransferase (EC 2.8.2.-)		14	3	340	37.6	6.47
1.4012	0.0397005	1.21117	A0A3B6GM28	Uncharacterized protein		32	3	177	18.8	8.03
2.46384	0.00343685	1.20929	A0A3B6AVZ3	PCI domain-containing protein		34	5	261	29.5	5.33
3.32099	0.000477542	1.20674	A0A3B6TQE5	HIT domain-containing protein		25	3	178	19	9.38
3.90442	0.000124617	1.20656	A0A1D5UGJ7	Peroxidase (EC 1.11.1.7)	CAMPLR22A2D_LOCUS3007	22	4	341	36.8	7.33	metabolic process;response to stimulus	extracellular	antioxidant activity;catalytic activity;metal ion binding
3.44764	0.000356747	1.20484	A0A3B6B881	Peroxidase (EC 1.11.1.7)		45	9	339	36.2	6.23
1.67865	0.0209582	1.20372	A0A3B6JKD1	Uncharacterized protein		31	6	326	34.5	7.08
3.37657	0.000420176	1.20244	A0A3B6IUX0	Uncharacterized protein		23	4	272	28.8	8
2.15788	0.00695223	1.20053	A0A3B6IZ21	PCI domain-containing protein		54	16	441	49.8	6.57
1.47188	0.033738	1.19853	A0A7H4LGM6			28	9	508	55	8.65
2.32439	0.00473812	1.19843	A0A3B5XZZ1	PCI domain-containing protein		47	11	385	43.4	5.77
2.89991	0.00125918	1.19595	A0A3B6H1U2	LEA_2 domain-containing protein		17	3	238	26.3	9.63
2.87777	0.00132505	1.19589	A0A3B5ZWM4	Uncharacterized protein		79	7	112	11.4	4.34
2.43079	0.00370863	1.19508	A0A3B6EIE9	Methyltransf_11 domain-containing protein		14	5	505	57.1	5.36
1.5586	0.0276313	1.19433	A0A3B6D847	Peptidase A1 domain-containing protein		19	4	439	45.8	8.84
1.42714	0.0373988	1.19369	A0A3B6H7J2	Uncharacterized protein		18	2	164	19.1	6.34
1.37262	0.0424016	1.19287	A0A3B6A3D9	Uncharacterized protein		33	13	672	75.8	8.35
2.55531	0.00278414	1.18983	A0A3B6B0Z9	Uncharacterized protein		28	7	416	44.8	5.27
1.35131	0.0445338	1.18937	A0A3B6LXA4	Uncharacterized protein		7	3	645	70.4	6.28
3.74176	0.000181234	1.18869	A0A1D6DI56	Uncharacterized protein	CAMPLR22A2D_LOCUS1441	37	10	452	49.9	8.07	metabolic process;regulation of biological process;response to stimulus		catalytic activity;nucleotide binding;protein binding
1.49973	0.0316422	1.18561	A0A1D5W940	PUA domain-containing protein		50	6	181	20.4	7.99		cytoplasm;cytosol	RNA binding
3.26475	0.000543563	1.18517	A0A3B6AQH5	HECT domain-containing protein		10	10	1862	200.9	6.28
2.29879	0.00502588	1.18421	A0A3B6GVD0	Uncharacterized protein		37	13	601	67.3	4.81
2.27774	0.00527549	1.18402	A0A3B6ILN4	Adenylyl cyclase-associated protein		40	12	480	51	6.87
2.06401	0.00862953	1.18363	A0A3B6LJ91	TFIIS N-terminal domain-containing protein		14	2	344	38.1	5.9
2.01771	0.00960046	1.18174	A0A3B6C167	Condensin complex subunit 1		11	10	1431	157.6	5.27
2.69495	0.00201858	1.18122	A0A3B6HTF1	ABC transporter domain-containing protein		16	3	309	33.2	6.7
1.77408	0.0168236	1.17886	A0A3B6PHM9	UBA domain-containing protein		28	6	411	46.3	6.07
2.37687	0.00419881	1.17753	Q70EV9	Cytochrome P450	CYP98A11	32	14	512	57.9	7.84	metabolic process		catalytic activity;metal ion binding
1.5445	0.0285429	1.17088	A0A3B6LT95	Uncharacterized protein		12	5	624	67.9	8.44
2.54572	0.0028463	1.16986	A0A3B6MRH1	Uncharacterized protein		54	6	129	14.5	6.32
2.92173	0.00119748	1.16952	A0A1D6SDJ5	Uncharacterized protein		16	3	356	38.5	7.9
2.89204	0.00128222	1.1694	A0A3B6GQ95	PB1 domain-containing protein		26	9	663	71.1	5.78
1.47226	0.0337087	1.16911	A0A1D6DIM7	Obg-like ATPase 1		60	19	394	44.3	6.95	regulation of biological process;response to stimulus	cytoplasm;cytosol	catalytic activity;nucleotide binding
2.33774	0.00459477	1.16576	A0A3B6KQK9	Uncharacterized protein		14	7	913	101.9	6.4
3.859	0.000138356	1.16503	A0A3B6IRU6	Proteasome subunit alpha type (EC 3.4.25.1)		64	11	237	25.9	4.7
1.40556	0.0393045	1.16384	A0A3B6JL78	PEROXIDASE_4 domain-containing protein		76	15	250	27.5	6.35
1.42059	0.0379677	1.16351	A0A3B6IYF2	Uncharacterized protein		45	11	363	39.4	7.01
2.1352	0.00732482	1.16326	A0A3B6RAF6	Limit dextrinase type starch debranching enzyme		8	4	962	105.9	5.91
3.0022	0.000994944	1.16122	A0A3B5Y7Z1	Malate dehydrogenase (EC 1.1.1.37)		69	15	341	35.5	8.38
1.85012	0.0141214	1.1569	A0A3B6D9F6	L-lactate dehydrogenase (EC 1.1.1.27)		40	8	358	37.9	7.06
2.36429	0.00432229	1.15605	A0A3B6PI20	Uncharacterized protein		6	2	462	49.1	6.52
1.73334	0.0184782	1.15522	A0A3B6C101	EF1_GNE domain-containing protein		57	11	218	23.3	4.67
3.90063	0.000125709	1.155	A0A3B5Z2M3	Uncharacterized protein		33	16	583	61.6	6.95
2.35847	0.00438053	1.15261	Q06I91	Fasciclin-like protein FLA15		40	7	289	29.4	8.95
1.4596	0.0347055	1.14907	A0A077RWS5	S-adenosylmethionine synthase (EC 2.5.1.6)	TRAES_3BF093000020CFD_c1	79	19	394	42.8	5.96	metabolic process		catalytic activity;metal ion binding;nucleotide binding
2.89431	0.00127552	1.14879	W5D653	PRA1 family protein	TRAES_3BF115600010CFD_c1	25	2	190	20.3	8.22	transport	membrane
2.45537	0.00350454	1.14275	A0A3B6PLJ7	Glycine cleavage system H protein		15	2	158	17	5.08
1.56361	0.0273144	1.14177	A0A3B6MRF4	Uncharacterized protein		27	5	230	24.1	4.07
3.55074	0.00028136	1.1413	A0A3B6R7L5	RRM domain-containing protein		27	5	266	28	6.83
3.31814	0.000480684	1.14058	A0A6F8Z1Z0			19	7	561	64.1	10.39
2.31967	0.00478992	1.13906	A0A3B6B5C9	Uncharacterized protein		21	5	298	33.1	5.14
1.94844	0.0112606	1.13759	W5H881	UBIQUITIN_CONJUGAT_2 domain-containing protein		38	3	148	16.5	7.88	metabolic process		catalytic activity;nucleotide binding;protein binding
1.65135	0.0223176	1.13733	A0A3B6SG61	Uncharacterized protein		16	5	472	51.8	5
1.44666	0.0357556	1.13717	P93596	Obtusifoliol 14-alpha demethylase (EC 1.14.14.154) (CYPLI) (Cytochrome P450 51) (Cytochrome P450-LIA1) (Fragment)	CYP51	55	18	453	51.6	7.18	metabolic process	endoplasmic reticulum;Golgi;membrane	catalytic activity;metal ion binding
1.48699	0.0325845	1.13556	A0A3B6ATZ1	Uncharacterized protein		7	3	582	66	8.81
1.55716	0.027723	1.13327	A0A3B6KEC1	Uncharacterized protein		24	3	232	24.9	6.16
2.3977	0.0040022	1.13298	A0A3B6LW48	DUF1618 domain-containing protein		14	4	444	50.3	6.39
2.53275	0.00293257	1.13273	A0A3B6NT83	Cupin_5 domain-containing protein		46	5	194	21.5	5.5
1.65399	0.0221823	1.13109	A0A3B6H0D3	Peptidylprolyl isomerase (EC 5.2.1.8)		33	4	156	16.5	8.25
2.32648	0.00471547	1.13105	A0A3B6LKC3	Ferritin (EC 1.16.3.1)		32	7	257	28.1	5.99
4.06779	8.55489e-05	1.13097	A0A3B6CB11	Uncharacterized protein		6	11	3077	333.8	6.23
2.44367	0.00360022	1.1293	A0A3B6H5R7	Uncharacterized protein		55	11	331	34.8	6.8
1.49399	0.0320631	1.12786	A0A3B6QGK3	AAA domain-containing protein		22	9	636	70.1	9.31
1.52502	0.0298522	1.12774	A0A3B6JHY7	SAP domain-containing protein		15	7	738	80.1	4.86
1.83105	0.0147553	1.12642	A0A3B6CA09	Uncharacterized protein		32	11	597	68.6	6.96
3.98668	0.000103116	1.12625	D3JCC7	Elicitor responsive gene 3	ERG3	71	7	144	15.7	4.07		cytoplasm	protein binding
2.13888	0.007263	1.12475	A0A3B6KN83	Uncharacterized protein		3	2	1215	136.9	6.84
1.76729	0.0170887	1.1245	A0A3B6LEZ6	Uncharacterized protein		70	22	446	48.1	5.68
3.50805	0.000310421	1.12333	A0A3B6RKF9	Uncharacterized protein		50	23	720	78.9	5.44
3.81601	0.000152752	1.1228	A0A3B5YQP2	Uncharacterized protein		58	3	74	7.8	4.88
2.95514	0.00110882	1.11991	A0A3B6HYT3	PCI domain-containing protein		60	21	443	50.4	7.85
1.44507	0.0358866	1.11782	A0A3B6EAR1	RING-type domain-containing protein		13	3	375	40.6	5.68
2.31555	0.00483561	1.11625	A0A3B6H6A6	OMPdecase domain-containing protein		35	10	479	51.1	6.54
2.95308	0.00111408	1.11517	A0A3B6B2K0	XendoU domain-containing protein		42	13	475	54.5	5.21
3.66856	0.000214506	1.11452	A0A3B6FVN1	Uncharacterized protein		57	14	359	41.2	6.54
1.61963	0.0240086	1.11392	A0A3B6RPH5	Uncharacterized protein		10	2	400	45	5.43
3.32047	0.000478109	1.11377	A0A3B5Z6H7	WHy domain-containing protein		74	8	163	17.7	5.36
1.49407	0.0320572	1.11072	A0A3B6MYW3	Uncharacterized protein		30	11	508	56.1	9.06
2.33304	0.00464472	1.10584	A0A3B6B612	Uncharacterized protein		31	6	292	32.1	6.28
2.01655	0.00962609	1.10402	A0A3B6AR02	PEROXIDASE_4 domain-containing protein		53	13	408	44.3	6.95
3.91854	0.00012063	1.10309	A0A3B5Y2D7	Delta-1-pyrroline-5-carboxylate synthase [Includes: Glutamate 5-kinase (GK) (EC 2.7.2.11) (Gamma-glutamyl kinase);Gamma-glutamyl phosphate reductase (GPR) (EC 1.2.1.41) (Glutamate-5-semialdehyde dehydrogenase) (Glutamyl-gamma-semialdehyde dehydrogenase)]		41	21	716	77.6	6.55
3.60699	0.000247176	1.1027	A0A3B6LYP0	Uncharacterized protein		42	12	497	54.3	6.52
1.46556	0.034233	1.10137	A0A3B6SDK6	Uncharacterized protein		4	2	556	62.4	4.83
2.12738	0.00745797	1.09796	A0A3B6KDR2	Uncharacterized protein		29	10	520	55.4	4.92
1.44569	0.0358351	1.09706	A0A341ZKV6	Pept_C1 domain-containing protein		47	7	199	20.9	4.79
2.58368	0.00260808	1.09609	A0A3B6QDG4	C2 domain-containing protein		22	4	289	29.9	5.02
2.40219	0.00396104	1.09533	A0A3B5Y2R1	Rab-GAP TBC domain-containing protein		14	8	830	93.3	4.86
3.15801	0.000695003	1.09294	A0A1D5UU04	Peroxidase (EC 1.11.1.7)	CAMPLR22A2D_LOCUS5726	39	9	341	35.4	6.89	metabolic process;response to stimulus	extracellular	antioxidant activity;catalytic activity;metal ion binding
1.39519	0.0402542	1.09212	A0A3B6LQF2	Uncharacterized protein		12	2	332	37.9	5.08
3.13621	0.000730783	1.09082	A0A3B6MJZ2	Uncharacterized protein		77	42	770	85.1	6.24
2.66143	0.00218059	1.08833	A0A1D5ULN9	Protein kinase domain-containing protein		26	8	494	55.4	5.44	metabolic process		catalytic activity;nucleotide binding;protein binding
2.91263	0.00122283	1.08695	A0A3B6HVT2	Uncharacterized protein		50	18	490	55.3	7.64
1.88382	0.0130671	1.08607	A0A3B6JIV6	Uncharacterized protein		23	4	272	28.8	7.31
1.95961	0.0109747	1.08422	A0A3B5ZV63	Uncharacterized protein		23	7	590	64.8	6.15
4.30467	4.95829e-05	1.08256	A0A3B6JN53	Ubiquitin-fold modifier-conjugating enzyme 1		49	5	184	20.4	7.83
1.92843	0.0117915	1.0806	A0A3B5ZPC9	Uncharacterized protein		57	5	144	15	6.1
1.65929	0.0219135	1.07985	A0A1D5UZ91	Uncharacterized protein	CAMPLR22A2D_LOCUS1515	9	5	1026	113.8	5.91		nucleus	DNA binding;protein binding
1.56953	0.0269445	1.07816	H9NAV6	Superoxide dismutase [Cu-Zn] (EC 1.15.1.1)	CAMPLR22A2D_LOCUS1074	32	3	152	15.1	6.18	metabolic process;response to stimulus		antioxidant activity;catalytic activity;metal ion binding
2.81077	0.00154606	1.07693	A0A3B6HWR8	Uncharacterized protein		44	8	268	30.1	5.74
1.35687	0.0439671	1.07626	A0A3B6NPH1	Protein kinase domain-containing protein		24	6	370	41.3	7.11
2.79581	0.00160025	1.07254	A0A3B6NN02	C2 domain-containing protein		15	3	300	30.9	4.91
1.77371	0.016838	1.06926	Q3S4I1	Eukaryotic translation initiation factor 5A (eIF-5A)	CAMPLR22A2D_LOCUS2580	62	8	161	17.4	6.14	metabolic process;regulation of biological process		RNA binding
2.66164	0.00217951	1.06917	A0A3B6C3B0	WPP domain-containing protein		40	4	164	16.7	4.45
2.08969	0.00813412	1.06867	A0A3B6TLT2	Uncharacterized protein		62	6	157	16.8	6.16
2.40391	0.00394543	1.06765	W5BSG8	FAD-binding PCMH-type domain-containing protein	CAMPLR22A2D_LOCUS4578	23	8	617	66.8	6.25	metabolic process	mitochondrion	catalytic activity;nucleotide binding
2.61209	0.00244295	1.0668	A0A3B6KIE1	Uncharacterized protein		23	4	230	24.4	4.03
1.37332	0.0423336	1.06587	A0A3B6CAQ5	HMA domain-containing protein		9	3	308	32.1	5.83
3.41642	0.000383332	1.06568	A0A3B6LQ83	Epimerase domain-containing protein		60	17	371	42	5.95
3.18092	0.00065929	1.06516	A0A3B6LY95	PCI domain-containing protein		60	21	443	50.4	7.85
2.76113	0.00173327	1.06417	A0A3B6GPC8	Uncharacterized protein		22	5	357	36.1	9.31
1.69432	0.0202152	1.06291	A0A3B6C5K0	AA_TRNA_LIGASE_II domain-containing protein		16	5	434	49.1	6.33
2.36061	0.00435901	1.06226	A0A3B6B781	Adenosylhomocysteinase (EC 3.3.1.1)		74	25	485	53.2	5.92
1.69672	0.0201039	1.06186	A0A3B6CEK9	ENTH domain-containing protein		10	4	603	63.9	5.07
2.29659	0.00505137	1.05879	A7J2I4	Tonoplast intrinsic protein	AQP5	20	2	249	25.2	6.02	transport	membrane	transporter activity
2.41902	0.00381051	1.05683	A0A3B6U6N9	Uncharacterized protein		9	2	357	39.2	5.43
1.3248	0.0473371	1.05635	A0A3B6PEW8	Acetyltransferase component of pyruvate dehydrogenase complex (EC 2.3.1.12)		40	19	532	57.2	7.99
1.87746	0.0132598	1.05562	A0A3B6TDA7	Uncharacterized protein		15	2	239	26.8	5.66
2.57014	0.00269067	1.05312	A0A077RQJ1	Uncharacterized protein	TRAES_3BF090300130CFD_c1 TRAES_3BF100100090CFD_c1	19	4	217	24.4	8.6
2.96922	0.00107343	1.0519	A0A3B6RFJ8	Annexin		57	15	314	35.3	7.28
1.3626	0.0433909	1.05131	A0A3B6GVH3	Peroxiredoxin (EC 1.11.1.15)		85	9	162	17.3	5.31
1.69682	0.0200992	1.04945	A0A3B6RQY7	AAI domain-containing protein		21	2	132	13.4	7.74
1.83177	0.014731	1.04911	A0A3B6JL41	Phosphoserine aminotransferase (EC 2.6.1.52)		41	13	422	44.5	8.31
1.46774	0.0340612	1.04905	A0A3B6D7Y6	ANK_REP_REGION domain-containing protein		34	2	149	15.4	4.54
1.79162	0.0161578	1.04857	W4ZSH7	UBIQUITIN_CONJUGAT_2 domain-containing protein		50	4	169	18.9	5.19			nucleotide binding
2.47688	0.00333519	1.04745	A0A3B6T8T6	Uncharacterized protein		25	6	407	44.4	5.91
2.22179	0.00600079	1.04743	A0A3B6JIS6	Uncharacterized protein		33	5	191	22	10.26
4.04713	8.97154e-05	1.04656	A0A3B6NR24	Isocitrate dehydrogenase [NAD] subunit, mitochondrial		42	13	396	43.8	6.73
3.2036	0.00062575	1.04581	A0A3B6TR94	Aha1_N domain-containing protein		44	11	354	38.8	5.87
1.41853	0.038148	1.04549	A0A7H4LLW2			31	3	175	19.2	4.61
1.43748	0.0365193	1.04458	A0A3B6I5N7	Uncharacterized protein		5	3	911	102.1	5.69
1.90511	0.012442	1.04421	A0A3B6AU55	Histone deacetylase		11	4	693	75.8	5.33
1.99243	0.0101759	1.04368	A0A3B6TH32	Uncharacterized protein		1	3	3367	362.9	5.44
2.10263	0.00789536	1.04367	A0A3B6N2V3	RING-type domain-containing protein		5	5	1919	214.7	5.94
1.6809	0.0208498	1.04253	A0A3B6LFV2	Uncharacterized protein		37	4	164	17.6	7.77
1.84622	0.0142489	1.042	A0A3B6INN7	Uncharacterized protein		45	8	268	30.1	6
2.28465	0.00519217	1.04191	A0A3B6GNN2	Uncharacterized protein		19	7	496	54.6	8.18
2.88735	0.00129613	1.0408	A0A3B6C6T1	AA_TRNA_LIGASE_II domain-containing protein		21	11	666	74.1	6.06
1.86715	0.0135786	1.03905	A0A3B6NKE4	Uncharacterized protein		66	6	185	17.7	6.76
2.98603	0.00103268	1.03736	A0A077RXJ4	Uncharacterized protein	TRAES_3BF151200030CFD_c1	18	2	61	7.3	5.35		mitochondrion
2.56111	0.00274717	1.0358	A0A3B6TLI0	Uncharacterized protein		51	34	967	109.5	5.97
2.69848	0.00200227	1.03518	A0A3B6N0S4	PHB domain-containing protein		45	8	289	31.9	9.72
1.47886	0.0332003	1.03283	A0A3B6A0X9	Lipase_GDSL domain-containing protein		24	5	376	40.6	8.47
2.08783	0.00816898	1.02993	A0A3B6RIB9	Uncharacterized protein		17	4	435	46.2	7.3
2.22052	0.0060184	1.02963	A0A3B6SDZ9	CS domain-containing protein		50	11	320	35.5	5.69
1.61386	0.02433	1.02891	A0A3B6B2F0	Chitin-binding type-1 domain-containing protein		45	8	276	29	8.84
2.66369	0.00216927	1.02837	A0A3B6RL54	Inositol polyphosphate multikinase (EC 2.7.1.140) (EC 2.7.1.151)		25	5	362	38.9	7.55
2.52197	0.0030063	1.02835	A0A1D6BLB8	Glutaredoxin domain-containing protein		39	4	135	14.6	7.96	cellular homeostasis;metabolic process;regulation of biological process	endoplasmic reticulum;Golgi;vacuole	catalytic activity
1.89018	0.012877	1.0275	A0A3B6TNQ3	Uncharacterized protein		63	15	415	43.7	8.09
3.42063	0.000379639	1.02571	A0A077RSI3	Uncharacterized protein	TRAES_3BF079100070CFD_c1	93	16	253	26.8	5.69	metabolic process;response to stimulus	cytosol;extracellular;membrane;mitochondrion;vacuole	catalytic activity;metal ion binding
2.72493	0.00188396	1.02398	A0A3B6NV46	Uncharacterized protein		50	16	459	47.8	8.1
2.16129	0.00689787	1.02381	A0A3B6KPY6	Uncharacterized protein		17	2	340	37.3	4.75
1.75958	0.0173948	1.02325	A0A3B6JJL8	Eukaryotic translation initiation factor 3 subunit I (eIF3i)		58	13	326	36.2	6.96
2.63689	0.00230734	1.02093	A0A3B5ZYU5	Thioredoxin		75	5	126	13.4	5.22
3.1682	0.000678896	1.01887	A0A3B6KQF6	FAS1 domain-containing protein		17	4	422	43.3	7.06
1.8958	0.0127115	1.01816	A0A3B6SSM1	Peroxidase (EC 1.11.1.7)		57	12	345	37.6	6.47
1.62118	0.023923	1.01581	A0A3B6DDH6	CS domain-containing protein		34	3	158	18.1	6.33
2.54272	0.00286604	1.01536	A0A3B6JIF5	Uncharacterized protein		36	6	214	23.9	9.14
1.32307	0.0475254	1.01522	A0A3B6IWN5	Uncharacterized protein		14	5	481	51.5	6.62
3.33226	0.000465305	1.01514	A0A3B5XZG4	Uncharacterized protein		47	6	234	24.7	5.2
1.9137	0.0121982	1.01512	A0A3B6SL41	Uncharacterized protein		50	9	298	33.2	6.47
3.04853	0.00089428	1.01345	A0A3B6MW86	Uncharacterized protein		29	5	325	35.2	8.09
1.82289	0.0150354	1.0129	A0A3B5ZU62	Uncharacterized protein		11	5	832	91.4	7.5
2.76417	0.0017212	1.01146	A0A3B6LIB8	Uncharacterized protein		6	2	557	58.6	9.54
1.99149	0.0101979	1.01007	A0A3B6EI32	SurE domain-containing protein		21	7	393	40.8	5.95
3.58288	0.00026129	1.00968	A0A3B6JM94	VPS9 domain-containing protein		26	7	475	53.5	4.82
3.76953	0.000170007	1.00777	A0A3B6JNU6	Uncharacterized protein		3	3	1737	191.4	5.81
2.13713	0.00729242	1.00737	A0A3B5ZQT4	Uncharacterized protein		71	13	252	26.9	7.4
1.87269	0.0134062	0.998504	A0A3B6NL98	Uncharacterized protein		62	9	230	24.8	6
1.97755	0.0105304	0.993719	A0A3B6HQU7	X8 domain-containing protein		12	3	528	56.4	5.94
1.31155	0.0488036	0.993123	A0A3B6QAJ9	Uncharacterized protein		56	16	238	27.1	8.12
1.85164	0.0140721	0.992965	W5D322	Uncharacterized protein	TRAES_3BF013300030CFD_c1	71	27	557	60.6	5.6	metabolic process	cytoplasm	catalytic activity;metal ion binding
1.66379	0.0216874	0.991955	A0A140CQF9	SNARE (SNARE protein)		25	2	121	13.7	6.33		membrane	protein binding
2.12363	0.00752271	0.991091	A0A3B6RMH3	Uncharacterized protein		31	2	112	12.4	9.82
4.15569	6.98725e-05	0.990925	A0A1D6DET1	Uncharacterized protein	CAMPLR22A2D_LOCUS2138	44	6	178	18.6	8.65
4.12844	7.43981e-05	0.990611	Q2LDZ1	Calcium-dependent protein kinase	CPK2B	36	13	513	56.7	5.66	metabolic process	membrane	catalytic activity;metal ion binding;nucleotide binding
2.48777	0.00325263	0.990579	A0A3B6GUL0	HTH La-type RNA-binding domain-containing protein		10	6	961	106.5	7.3
3.39413	0.000403529	0.989987	W5CPX1	OMPdecase domain-containing protein	TRAES_3BF139100030CFD_c1	59	17	473	50.4	7.06	metabolic process		catalytic activity
2.12907	0.00742906	0.987826	A0A3B6SM44	Uncharacterized protein		16	9	823	90.3	5.21
2.14919	0.00709268	0.985947	A0A3B6B9C5	Pyruvate kinase (EC 2.7.1.40)		61	21	514	55.5	7.91
2.02398	0.0094628	0.985943	A0A3B6MLA0	Uncharacterized protein		14	6	889	98.3	6.81
1.85361	0.0140086	0.985031	A0A3B6FKL0	PNP_UDP_1 domain-containing protein		34	5	361	39.3	5.72
1.48258	0.0329172	0.981875	A0A3B5ZUX4	AAI domain-containing protein		32	3	146	14.7	7.8
1.32656	0.0471453	0.979579	A0A3B5Y839	AAA domain-containing protein		9	4	706	75.7	8.81
4.06543	8.60137e-05	0.977846	A0A3B6RHJ8	Nicalin		37	15	555	60.6	6.62
1.57288	0.0267377	0.977445	A0A3B6JLG9	Amino-acid acetyltransferase (EC 2.3.1.1) (N-acetylglutamate synthase) (AGS)];Arginine biosynthesis bifunctional protein ArgJ beta chain] [Includes: Glutamate N-acetyltransferase (GAT) (EC 2.3.1.35) (Ornithine acetyltransferase) (OATase) (Ornithine transacetylase);Arginine biosynthesis bifunctional protein ArgJ, chloroplastic [Cleaved into: Arginine biosynthesis bifunctional protein ArgJ alpha ch…		15	3	410	42.8	6.93
3.12081	0.000757165	0.977386	A0A3B6PJM1	Glyceraldehyde-3-phosphate dehydrogenase (EC 1.2.1.-)		51	12	416	43.8	7.46
3.21879	0.000604242	0.97673	A0A3B6NT73	Uncharacterized protein		22	4	240	27	9.13
3.65685	0.000220367	0.975528	W5A761	RPN13_C domain-containing protein		44	7	306	33.5	4.58		cytoplasm;nucleus
3.28257	0.000521705	0.975286	A0A1D6D2F0	Uncharacterized protein		54	21	545	59.2	6.21	metabolic process	cytoplasm	nucleotide binding;protein binding
2.51308	0.00306848	0.975153	A0A3B6PG11	Uncharacterized protein		26	5	254	27.2	9.6
2.01138	0.00974128	0.974312	A0A3B6GZV2	Uncharacterized protein		7	2	433	48.7	8.98
1.68982	0.0204258	0.973946	A0A1D5UUT1	Uncharacterized protein	CAMPLR22A2D_LOCUS550	33	4	229	24.7	8.44
3.15108	0.000706185	0.973166	W5HZE9	AAA domain-containing protein		56	18	423	47.1	8.97	metabolic process;response to stimulus	cytoplasm	catalytic activity;nucleotide binding;RNA binding
2.08545	0.00821389	0.972704	A0A3B6KTJ6	Epimerase domain-containing protein		7	2	361	39.8	6.46
4.69054	2.03919e-05	0.971887	Q43654	Starch synthase 1, chloroplastic/amyloplastic (EC 2.4.1.21) (Starch synthase I-2) (SS I) (SS I-2)	WSSI-2	5	2	647	71	6.24	metabolic process		catalytic activity
4.04842	8.9449e-05	0.971782	A0A3B6SH94	Elongation factor G, mitochondrial (EF-Gmt) (Elongation factor G 1, mitochondrial) (mEF-G 1) (Elongation factor G1)		28	10	758	83.7	6.47
3.12613	0.000747942	0.971146	A0A3B6NJD4	L-lactate dehydrogenase (EC 1.1.1.27)		62	11	358	38	7.06
2.29672	0.00504989	0.969645	A0A3B5Y4R1	Glyco_transf_20 domain-containing protein		20	11	902	101.1	5.6
1.39696	0.0400903	0.967843	W5CRK3	AB hydrolase-1 domain-containing protein	TRAES_3BF275200040CFD_c1	10	3	343	37.8	7.44		mitochondrion	catalytic activity;nucleotide binding
2.1887	0.00647589	0.967643	A0A3B6RNY6	Uncharacterized protein		6	2	370	42.9	8.25
2.93903	0.00115073	0.967061	A0A3B5YW44	Uncharacterized protein		30	9	489	53.1	5.2
2.07042	0.00850312	0.966278	A0A3B5YV72	Flavokinase domain-containing protein		24	6	397	43.8	5.52
2.25857	0.00551359	0.965314	A0A3B6PMU5	zinc_ribbon_10 domain-containing protein		9	2	393	42.7	7.87
2.27396	0.00532162	0.960714	A0A3B6TMP2	Uncharacterized protein		15	9	1279	137.3	4.67
3.62286	0.000238311	0.95884	W5AJZ4	Golgi apparatus membrane protein TVP23		13	2	186	21	8.15	cell growth;cell organization and biogenesis;transport	endosome;Golgi;membrane
2.39816	0.00399795	0.958415	A0A3B6C0M6	Uncharacterized protein		35	3	148	16.9	5.87
1.59707	0.0252887	0.953696	Q8LRM9	Translation initiation factor		37	2	115	12.7	8.79	metabolic process		RNA binding
3.14225	0.000720701	0.952519	A0A3B6NLG8	Uncharacterized protein		40	8	373	39.6	9.45
1.67079	0.0213409	0.952171	A0A3B6GTQ1	Uncharacterized protein		24	4	201	21.9	5.16
2.38546	0.0041166	0.951482	A0A3B6GU26	Reticulon-like protein		22	4	286	31.2	8.35
2.36196	0.00434552	0.950274	A0A3B6RDA4	Proteasome subunit beta (EC 3.4.25.1)		51	9	279	29.8	6.06
1.60107	0.0250568	0.950052	A0A3B6SGV2	Uncharacterized protein		14	3	487	54.3	6.74
1.88821	0.0129356	0.949822	A0A3B6KS68	TYR_PHOSPHATASE_2 domain-containing protein		18	5	369	41.4	5.88
2.09625	0.00801208	0.948473	A0A3B6QDX9	Uncharacterized protein		8	3	696	71.1	7.39
3.15818	0.000694732	0.946788	A0A3B6JHH1	Pyruvate kinase (EC 2.7.1.40)		37	13	530	57.8	6.33
3.54733	0.000283573	0.944966	A0A3B6QKV4	PLAT domain-containing protein		34	4	185	19.4	5.76
2.74899	0.00178243	0.943646	A0A3B6RDA2	ThiF domain-containing protein		27	9	424	46.1	4.78
2.81758	0.00152203	0.942997	A0A1D6C057	Fructose-1,6-bisphosphate aldolase 19	FBA19	31	26	1383	148.4	6.05	metabolic process		catalytic activity;metal ion binding;nucleotide binding
1.38219	0.0414776	0.942332	A0A3B6GZK9	Uncharacterized protein		49	22	683	73.3	5.87
2.22189	0.00599942	0.941265	A0A3B5Y157	Uncharacterized protein		6	4	980	110.4	6.54
2.46378	0.00343729	0.939663	A0A3B6NR27	Uncharacterized protein		30	7	371	40.2	7.88
6.16464	6.84479e-07	0.937609	A0A3B6CIR4	Pyruvate kinase (EC 2.7.1.40)		63	22	514	55.4	8.06
2.78793	0.00162955	0.937413	A0A3B5YVB1	Uncharacterized protein		14	3	452	45.1	6.44
2.92366	0.00119218	0.937326	A0A3B6KMV4	ADF-H domain-containing protein		59	5	145	16.7	5.64
1.90398	0.0124746	0.936964	A0A3B6GW97	Tr-type G domain-containing protein		11	7	673	72.9	7.39
2.74748	0.00178864	0.934393	A0A1D5UJ66	Uncharacterized protein	CAMPLR22A2D_LOCUS5684	27	9	497	54	4.78			metal ion binding
1.40108	0.0397116	0.933244	A0A3B6HUE1	Phytochrome		8	7	1166	127.6	6.06
2.35388	0.00442707	0.932963	A0A3B6CI29	Sulfotransferase (EC 2.8.2.-)		48	10	326	36.7	6.44
1.38697	0.0410228	0.931739	A0A1D6DJ20	Uncharacterized protein		71	16	377	41.8	5.58			nucleotide binding
2.38015	0.00416729	0.930373	A0A3B6IPH8	Uncharacterized protein		26	4	191	22	10.26
1.98802	0.0102798	0.93012	A0A3B5ZM95	Uncharacterized protein		40	5	182	20.5	8.31
2.0054	0.00987647	0.929477	D8L9Q2	Glucan endo-1,3-beta-glucosidase GII,putative, expressed	TAA_ctg0661b.00070.1	50	10	331	35	6.35	metabolic process		catalytic activity
1.39053	0.040688	0.92836	A0A3B6AYR2	Aldo_ket_red domain-containing protein		39	9	346	37.9	6.37
2.06369	0.00863592	0.927894	A0A3B6ARA1	Vps54 domain-containing protein		19	10	994	108.7	5.95
2.13865	0.007267	0.92688	A0A3B6MNL5	Polyadenylate-binding protein (PABP)		44	21	651	70.7	7.37
1.47628	0.0333976	0.926413	A0A3B5ZNJ3	Cellulase domain-containing protein		21	13	1074	117.4	5.76
1.95188	0.0111716	0.926116	A0A3B6U8Y1	GOLD domain-containing protein		29	7	418	47.6	6.16
2.12793	0.00744851	0.925104	A0A3B6PCU7	TPR_REGION domain-containing protein		27	10	483	50.6	5.11
1.8813	0.0131431	0.924534	A0A3B6LRD0	Alba domain-containing protein		18	3	323	35.1	9.61
2.70564	0.00196952	0.923722	W5CYH7	ATP-grasp domain-containing protein	TRAES_3BF073700180CFD_c1	22	9	632	68.1	7.69	metabolic process		catalytic activity;metal ion binding;nucleotide binding
1.67202	0.0212802	0.923261	A0A3B6NRE2	RBR-type E3 ubiquitin transferase (EC 2.3.2.31)		14	6	589	66	5.35
2.04035	0.00911281	0.921583	A0A3B6HVL4	SERPIN domain-containing protein		32	9	399	42.6	6.3
2.25844	0.00551522	0.920408	A0A3B6SNM6	GTP-binding nuclear protein		40	8	223	25.3	7.01
1.52923	0.0295641	0.919316	A0A3B6TJC7	Uncharacterized protein		35	9	306	33.8	5.95
1.94349	0.0113895	0.918651	A0A3B6RQB7	Uncharacterized protein		7	2	544	60.3	9.03
2.86674	0.00135914	0.917507	A0A1D6CXJ5	T-complex protein 1 subunit delta		67	26	534	57.4	6.99	metabolic process;response to stimulus	cytoplasm;cytosol	nucleotide binding;protein binding
2.33749	0.00459737	0.917376	A0A1W6I4N8	Eukaryotic initiation factor eIF4E		42	5	215	24	5.62	metabolic process;regulation of biological process	cytoplasm	RNA binding
1.30932	0.0490552	0.917333	A0A3B6EDM6	Alba domain-containing protein		24	2	155	16.2	5.01
3.20994	0.000616675	0.917321	A0A2X0SIY5	DUF4205 domain-containing protein	CAMPLR22A2D_LOCUS2992	26	10	651	70.3	5.06
4.60425	2.48742e-05	0.915551	A0A3B6EJ36	Protein kinase domain-containing protein		11	4	650	71.8	5.47
1.53655	0.0290705	0.914043	A0A3B6B4Z6	Chorein_N domain-containing protein		3	2	1210	132.4	5.72
1.39662	0.0401213	0.913718	A0A3B5YV90	Protein kinase domain-containing protein		3	2	845	93.7	7.9
3.52383	0.000299344	0.913265	A0A3B6DNQ7	Anamorsin homolog (Fe-S cluster assembly protein DRE2 homolog)		57	9	263	27.7	4.89
2.41169	0.00387538	0.910861	A0A3B6HQF6	Uncharacterized protein		59	21	525	57.2	6.02
3.17623	0.000666455	0.909866	A0A3B5XU98	Glucose-6-phosphate isomerase (EC 5.3.1.9)		59	20	567	62.3	7.43
3.33857	0.000458594	0.909866	A0A3B6ELG3	Aspartate aminotransferase (EC 2.6.1.1)		82	24	387	42.6	8.22
2.86352	0.00136923	0.908782	F8S6U7	Pathogenesis-related protein 1-17 (Pathogenesis-related protein PRB1-2-like)	Pr-1-17	48	6	174	18.9	7.72		extracellular
3.1947	0.000638706	0.908266	A0A3B6TXN5	U-box domain-containing protein		31	14	1001	111.8	5.38
2.0587	0.00873582	0.906676	W5CQ67	Glycylpeptide N-tetradecanoyltransferase (EC 2.3.1.97)	TRAES_3BF075800110CFD_c1	32	10	438	49.5	6.55	metabolic process		catalytic activity
1.8175	0.015223	0.906629	A0A3B6GPN9	Uncharacterized protein		40	11	484	51.3	5.92
2.17026	0.00675684	0.905604	A0A3B6EGA8	Uncharacterized protein		47	32	1172	127.5	6.1
1.52414	0.0299133	0.904464	A0A3B6HUP2	Uncharacterized protein		50	20	540	57.9	5.48
1.5634	0.0273276	0.904419	A0A077RWW5	Uncharacterized protein	TRAES_3BF104500010CFD_c1	23	8	567	61.9	5.26
1.4887	0.0324563	0.903577	W5ASA4	Uncharacterized protein	CAMPLR22A2D_LOCUS2419	55	4	154	17.4	10.27	metabolic process	ribosome	RNA binding;structural molecule activity
1.96981	0.0107199	0.900409	A0A3B6NVX6	Uncharacterized protein		20	5	521	55.8	6.79
2.44099	0.00362249	0.900038	A0A3B6KS84	Peptidyl-prolyl cis-trans isomerase (PPIase) (EC 5.2.1.8)		25	3	198	21.4	8.18
1.79548	0.0160147	0.899919	A0A3B6KBU5	Enolase-phosphatase E1 (EC 3.1.3.77) (2,3-diketo-5-methylthio-1-phosphopentane phosphatase)];Probable bifunctional methylthioribulose-1-phosphate dehydratase/enolase-phosphatase E1 [Includes: Methylthioribulose-1-phosphate dehydratase (MTRu-1-P dehydratase) (EC 4.2.1.109)		47	13	517	56.7	6.44
1.62159	0.0239008	0.899658	A0A3B6ASK4	THUMP domain-containing protein		19	5	408	45	5.76
1.57432	0.0266492	0.898943	A0A3B6QHT7	Peroxidase (EC 1.11.1.7)		12	3	334	36.1	7.72
2.36751	0.00429029	0.898877	W5C0Q7	Uncharacterized protein	CAMPLR22A2D_LOCUS3593	20	2	135	15.4	7.2	transport	cytoplasm
2.26575	0.00542317	0.897998	A0A3B5ZW23	Uncharacterized protein		5	3	1151	127.6	7.93
1.90661	0.012399	0.897819	A0A3B5ZU67	Uncharacterized protein		53	5	150	16.6	7.18
3.35427	0.000442316	0.895631	A0A3B6RDB3	Uncharacterized protein		17	4	352	39.4	5
4.65746	2.20059e-05	0.895031	A0A3B6JH94	Uncharacterized protein		49	15	494	53.2	7.61
4.30864	4.91309e-05	0.894532	A0A3B6QH28	Uncharacterized protein		41	33	968	110.1	6.11
2.08368	0.00824741	0.893758	A0A3B6KGR6	Uncharacterized protein		49	16	440	47.2	5.33
1.98442	0.0103652	0.89162	W5C657	WPP domain-containing protein	CAMPLR22A2D_LOCUS4325	40	3	164	16.7	4.31
1.46131	0.0345693	0.891484	A0A3B6CIY5	C2 domain-containing protein		46	3	142	15.5	4.32
2.23672	0.00579796	0.890376	A0A077S020	MGS domain-containing protein	TRAES_3BF151600050CFD_c1	28	10	560	60.9	6.71	metabolic process		catalytic activity
2.64453	0.00226708	0.89021	A0A1D5V0L1	GRAS domain-containing protein	CAMPLR22A2D_LOCUS1798	8	3	555	61.3	6.39	metabolic process;regulation of biological process
2.49176	0.00322286	0.888145	A0A3B5Y1M2	Uncharacterized protein		8	7	1632	178.5	6.19
5.21835	6.04855e-06	0.888095	A0A3B5Y2C2	Uncharacterized protein		32	12	475	52.1	7.24
3.62979	0.000234539	0.886927	A0A3B6GVC5	PRA-CH domain-containing protein		36	6	298	32.4	7.93
3.60766	0.000246799	0.886834	A0A3B5ZRV7	Uncharacterized protein		65	29	558	59.5	5.4
1.99841	0.0100367	0.885892	A0A3B6FXL2	Uncharacterized protein		14	3	334	34.7	8.02
3.54017	0.000288288	0.885769	A0A3B6QLB9	Usp domain-containing protein		80	8	162	17.1	7.27
1.64909	0.0224339	0.88389	A0A3B6MYY2	Prefoldin subunit 4		52	5	126	14.4	4.51
2.82461	0.00149757	0.883468	A0A3B6LVN2	S5 DRBM domain-containing protein		45	12	274	29.9	10.17
1.35478	0.0441798	0.882963	A0A3B6MT85	Uncharacterized protein		27	5	402	42.8	8.72
4.42226	3.78214e-05	0.882881	A0A3B5XVX7	Tubulin gamma chain		12	3	469	52.7	6.06
2.09469	0.00804107	0.882828	A0A3B6LL14	Ferrochelatase (EC 4.99.1.1)		27	7	484	53.5	6.9
3.02418	0.00094584	0.882436	A0A3B6DEQ1	Uncharacterized protein		11	2	307	35.1	8.47
3.19672	0.000635737	0.881096	A0A3B6LXC1	Tr-type G domain-containing protein		60	39	843	93.7	6.16
3.35665	0.000439892	0.875929	A0A3B6QM83	Transmembrane 9 superfamily member		15	7	666	74.2	7.23
1.50548	0.0312263	0.87577	A0A3B6JJG7	Uncharacterized protein		30	5	227	24.8	8.68
3.92728	0.000118228	0.875451	A0A3B6LGV2	Uncharacterized protein		36	74	3628	400.9	5.3
4.18468	6.53605e-05	0.874253	A0A1D6AY03	Uncharacterized protein		24	3	194	21.8	6.2	regulation of biological process;response to stimulus		nucleotide binding
1.83777	0.0145287	0.87186	A0A3B6QEK4	Uncharacterized protein		43	24	726	78.7	9.16
2.04591	0.00899683	0.871776	A0A3B6C512	Uncharacterized protein		11	3	428	44.6	8.21
3.03055	0.000932068	0.870401	A0A3B5Y2I8	Uncharacterized protein		19	3	221	25.1	9.44
1.88681	0.0129775	0.869959	A0A3B6TWC8	C2H2-type domain-containing protein		14	7	700	77.7	8.79
1.38852	0.0408776	0.869954	R9UNY9	Xylanase inhibitor protein	xip	38	11	304	33.3	8.47	defense response;metabolic process;response to stimulus	extracellular	catalytic activity
3.72477	0.000188465	0.867289	A0A3B6AX90	Uncharacterized protein		22	4	426	44.6	8.5
1.56168	0.0274359	0.864725	A0A3B6HMK6	Glutathione reductase (GRase) (EC 1.8.1.7)		14	5	550	59.3	8.19
2.53568	0.00291287	0.864072	A0A3B6RQH9	Uncharacterized protein		9	2	217	23.7	5.87
2.01535	0.00965267	0.862119	Q8S3J5	Ferredoxin		32	2	151	16.1	4.88	metabolic process;transport		metal ion binding
2.10108	0.0079235	0.860795	W5FSR5	UBIQUITIN_CONJUGAT_2 domain-containing protein		42	5	153	17.3	6.57			nucleotide binding
4.34672	4.50068e-05	0.860722	A0A3B6TN53	Uncharacterized protein		34	26	1383	148.4	6.19
1.58771	0.0258401	0.860595	W5AH12	Uncharacterized protein		64	15	377	41.6	5.49			nucleotide binding
1.33785	0.0459358	0.859134	A0A3B6KR13	Uncharacterized protein		10	2	322	35.3	5.48
2.30609	0.00494211	0.858418	A0A3B5XVP1	Uncharacterized protein		51	11	324	34.6	8.54
1.85612	0.0139276	0.858334	W5C2F4	Uncharacterized protein	CAMPLR22A2D_LOCUS2536	28	14	754	82.4	5.66		cytosol	protein binding
3.46635	0.000341703	0.857421	A0A1D5Z340	Ribosomal_L7Ae domain-containing protein		46	12	259	29.4	10.35
2.1444	0.00717129	0.857128	A0A3B5Y4Y0	Aldedh domain-containing protein		54	20	551	61.1	7.14
1.77518	0.0167809	0.857104	A0A1D5UZ29	Uncharacterized protein	CAMPLR22A2D_LOCUS123	34	24	1052	113.9	7.34	cell growth;cell organization and biogenesis;regulation of biological process;transport		metal ion binding
1.57011	0.0269088	0.853265	A0A3B6LS76	PPM-type phosphatase domain-containing protein		30	7	382	41.3	5.36
1.91518	0.0121568	0.851666	A0A3B6PEQ0	Ubiquitin-like domain-containing protein		22	11	974	99.9	4.97
2.49004	0.00323562	0.851592	A0A3B5YW55	RING-type domain-containing protein		27	4	369	38	4.55
1.53145	0.0294134	0.851326	A0A3B5XZC0	Uncharacterized protein		18	4	392	42.9	7.9
3.03915	0.000913798	0.8512	A0A3B6RID6	Uncharacterized protein		48	15	397	44	8.05
3.10303	0.0007888	0.850941	A0A2X0S7E3	PHB domain-containing protein	CAMPLR22A2D_LOCUS3278	59	10	285	30.6	6.98
2.09527	0.00803018	0.85087	A0A3B6KDR3	Uncharacterized protein		34	70	3632	401.8	5.26
1.90045	0.0125763	0.850823	A0A3B6KHD5	TPT domain-containing protein		19	4	401	42.7	10.08
2.4041	0.00394369	0.85081	A0A1D5UN35	Uncharacterized protein	CAMPLR22A2D_LOCUS5499	13	4	601	64.8	7.99	metabolic process		catalytic activity
2.81958	0.00151502	0.850628	A0A3B6ILK9	Uncharacterized protein		30	48	2621	286.4	7.28
2.31702	0.00481931	0.84971	A0A3B6S9U6	Uncharacterized protein		10	2	401	40	4.98
1.38177	0.0415175	0.849372	A0A3B6GSG2	Uncharacterized protein		41	4	134	15	8.81
2.28898	0.00514067	0.847401	A0A3B6LJ05	Clat_adaptor_s domain-containing protein		45	5	182	19.9	4.81
4.11194	7.72784e-05	0.847057	A0A3B6QCG5	Uncharacterized protein		34	22	1101	123.5	4.82
2.89261	0.00128052	0.8464	W5FEZ3	40S ribosomal protein S12		83	8	144	15.3	5.74	metabolic process	ribosome	structural molecule activity
1.56446	0.0272607	0.84544	A0A3B6NUW2	CULLIN_2 domain-containing protein		10	6	736	85.4	7.34
2.03415	0.00924372	0.845157	W5CYM2	NADH-cytochrome b5 reductase (EC 1.6.2.2)	TRAES_3BF012100020CFD_c1	59	11	279	31	8.29	metabolic process	membrane	catalytic activity
4.4741	3.35663e-05	0.844124	A0A3B6RJB7	Aha1_N domain-containing protein		49	12	358	39.1	5.87
3.8791	0.000132098	0.843258	A0A3B6LKT1	GrpE protein homolog		48	11	301	32.9	5.33
2.03491	0.00922772	0.842632	A0A3B6IRA5	UBA_e1_C domain-containing protein		33	22	1043	116.1	5.49
2.47843	0.0033233	0.842448	A0A3B6C807	Uncharacterized protein		12	3	545	60.3	9.39
1.72766	0.0187215	0.840778	A0A3B6JIR3	Uncharacterized protein		68	28	651	71.3	5.21
2.05641	0.00878197	0.840429	A0A3B6RBC5	3-oxoacyl-[acyl-carrier-protein] synthase		41	11	459	48.4	7.4
1.91846	0.0120655	0.840294	A0A3B6QJ10	Uncharacterized protein		33	12	597	66	7.25
2.7403	0.00181844	0.840228	A0A3B6LUB2	Ferredoxin--NADP reductase, chloroplastic (FNR) (EC 1.18.1.2)		40	9	373	40.9	8.41
1.51988	0.030208	0.839105	A0A1D5ZQU3	AP complex subunit sigma		17	2	161	18.6	7.3	transport		transporter activity
2.17283	0.00671697	0.837754	A0A3B6GT59	Peroxidase (EC 1.11.1.7)		14	4	352	37.1	6.52
2.03642	0.00919565	0.835201	A0A3B6C9E7	Glutaredoxin domain-containing protein		66	6	131	13.5	7.85
2.91312	0.00122146	0.834752	A0A3B6KGJ0	Glutamine amidotransferase type-1 domain-containing protein		37	9	441	48	7.55
1.99482	0.0101199	0.834669	A0A3B5ZZT8	Lipase_GDSL domain-containing protein		16	2	364	39.5	8.76
3.58664	0.000259036	0.834555	W4ZRU3	Ribosomal_L7Ae domain-containing protein		58	6	112	12.3	9.55	metabolic process	ribosome	structural molecule activity
1.73142	0.0185601	0.834371	A0A3B6KA97	Plasma membrane ATPase (EC 7.1.2.1)		12	8	958	105.3	6.79
1.618	0.0240992	0.833432	A0A3B6SNC9	Uncharacterized protein		46	3	85	9.5	8.72
3.99369	0.000101463	0.832075	A0A3B6GRT1	Uncharacterized protein		58	9	201	22.8	6.8
1.72402	0.0188792	0.830716	A0A3B5XW19	Uncharacterized protein		17	4	341	36.9	6.74
1.42052	0.0379736	0.83026	A0A3B6H402	RRM domain-containing protein		51	5	176	17.2	7.97
2.7117	0.00194223	0.828661	A0A3B5ZPK3	Peroxidase (EC 1.11.1.7)		29	7	340	35.9	8.27
3.57603	0.000265444	0.828477	A0A7H4LF54			70	50	1123	122.8	4.89
3.49878	0.000317114	0.828071	A0A0K1YXN8	Non-specific serine/threonine protein kinase (EC 2.7.11.1)		14	6	500	56.9	8.57	metabolic process		catalytic activity;nucleotide binding
1.58122	0.026229	0.827186	A0A3B6D9S7	Ribosome biogenesis protein WDR12 homolog		11	2	435	47.3	6.16
2.79597	0.00159968	0.826488	A0A3B6JNI4	Uncharacterized protein		62	21	500	54.5	6.25
1.32646	0.0471566	0.826384	A0A3B6RCG7	Uncharacterized protein		22	12	1268	136.7	4.65
2.79074	0.00161907	0.826002	A0A3B6KQU4	GRAS domain-containing protein		9	2	501	55.3	6.07
1.3465	0.0450297	0.825326	A0A3B6LW11	ETF domain-containing protein		36	8	392	41.5	7.71
2.24603	0.00567501	0.82499	A0A3B6EDZ8	Uncharacterized protein		40	27	1094	122.9	6.46
2.28924	0.00513763	0.824041	A0A3B6C0D4	Uncharacterized protein		56	7	130	14.5	9.55
3.40143	0.000396799	0.823763	A0A3B6MPG9	UBA_e1_C domain-containing protein		49	33	1051	116.7	5.34
1.96677	0.0107953	0.823103	A0A1D5UVK8	tRNA-dihydrouridine(47) synthase [NAD(P)(+)] (EC 1.3.1.-) (tRNA-dihydrouridine synthase 3)	CAMPLR22A2D_LOCUS91	12	6	678	74.9	6.46	metabolic process	vacuole	catalytic activity;metal ion binding;nucleotide binding
1.66589	0.021583	0.82283	W5ACP2	BOWMAN_BIRK domain-containing protein		32	2	90	9.6	8.35	regulation of biological process	extracellular	enzyme regulator activity
2.1859	0.00651785	0.821602	A0A1D5UPJ9	UBX domain-containing protein	CAMPLR22A2D_LOCUS5422	17	5	456	50.3	4.94			protein binding
2.2149	0.00609679	0.818973	A0A077RSY3	DLH domain-containing protein	TRAES_3BF065100030CFD_c1	43	6	244	26.3	5.43			catalytic activity
2.06203	0.00866893	0.818755	A0A3B6TRN0	Protein-L-isoaspartate O-methyltransferase (EC 2.1.1.77)		19	3	290	31.1	7.33
2.97634	0.00105599	0.818739	A0A3B6FFA6	Uncharacterized protein		53	16	438	48.3	7.47
1.34011	0.0456976	0.81859	A0A3B6KQL2	SERPIN domain-containing protein		36	9	398	43.1	5.87
1.49693	0.0318471	0.818458	A0A3B6HX51	WD_REPEATS_REGION domain-containing protein		7	2	380	41.7	7.42
1.69228	0.0203104	0.81788	A0A3B6N2Z1	Lipoxygenase (EC 1.13.11.-)		39	22	868	96.9	5.92
3.57762	0.00026447	0.817854	A0A3B6H1W1	Alpha-1,4 glucan phosphorylase (EC 2.4.1.1)		58	32	832	93.7	7.58
4.16966	6.76616e-05	0.817818	U5HTD8	Ribosomal protein S20	rps20	55	7	127	14.1	9.44	metabolic process	ribosome	structural molecule activity
2.28671	0.0051676	0.816841	A0A3B6EDK9	PB1 domain-containing protein		24	9	704	75.2	5.5
2.2889	0.00514167	0.816251	A0A3B6DB70	EF1_GNE domain-containing protein		65	12	218	23.3	4.67
2.46536	0.0034248	0.815779	A0A341XZK6	60S ribosomal protein L27		45	6	137	15.6	10.55
2.69848	0.00200226	0.815487	A0A3B6LTV3	Uncharacterized protein		30	2	99	10.9	9.25
2.36196	0.00434545	0.815414	W5E0K4	CHCH domain-containing protein		47	3	110	12.4	7.09
3.75422	0.000176108	0.813537	A0A3B6IJ92	LRRcap domain-containing protein		35	7	279	29.5	4.08
2.42941	0.00372038	0.813486	A0A2X0S3C3	Uncharacterized protein	CAMPLR22A2D_LOCUS1690	46	15	521	58.5	6.13
2.98827	0.00102737	0.812799	A0A3B5Z3Y7	Uncharacterized protein		58	10	288	30.5	9.22
1.64489	0.0226519	0.811849	A0A3B6ATD7	EF1_GNE domain-containing protein		65	12	218	23.4	4.67
2.79831	0.00159108	0.810344	A0A3B6IXV7	N-acetyltransferase domain-containing protein		20	3	225	24.4	5.41
2.48227	0.00329407	0.809943	A0A3B6JI12	Uncharacterized protein		50	18	490	55.4	7.39
1.70022	0.0199426	0.808412	Q7X729	Acidic ribosomal protein P2 (Acidic ribosomal protein P2a-2) (Fragment)		46	4	112	11.4	4.41	metabolic process	ribosome	structural molecule activity
2.19143	0.00643527	0.808372	A0A3B6TR99	Uncharacterized protein		70	12	235	25.3	5.67
1.53845	0.0289434	0.808276	C8CBK4	SNF1-type serine-threonine protein kinase	SnRK2.4	10	3	363	42.1	6.23	metabolic process		catalytic activity;nucleotide binding
1.68205	0.0207948	0.806441	A0A7H4LMH3			39	10	387	43.6	5.3
1.38955	0.0407801	0.805746	A0A3B5Y4U6	Phosphotransferase (EC 2.7.1.-)		11	3	493	52.9	6.55
1.67467	0.021151	0.805146	A0A3B6RHN0	Uncharacterized protein		73	10	247	27.1	5.17
2.52952	0.00295449	0.804894	W5D0E3	Fructose-bisphosphate aldolase (EC 4.1.2.13)	FBA13 TRAES_3BF107400010CFD_c1	77	23	358	38.9	7.21	metabolic process		catalytic activity
1.74017	0.0181898	0.804689	A0A3B6LXB6	Uncharacterized protein		40	9	381	40.1	6.13
2.64018	0.00228992	0.804194	A0A3B6JP74	Uncharacterized protein		15	8	917	102.2	6.64
2.57953	0.00263312	0.804144	A0A3B6C250	Uncharacterized protein		37	28	1095	123	6.49
1.69966	0.0199684	0.803359	A0A3B6B8R9	Peroxidase (EC 1.11.1.7)		38	8	341	36.5	5.96
2.28075	0.00523905	0.803121	A0A3B6LMA2	Uncharacterized protein		55	7	225	23.9	5.1
1.73498	0.0184085	0.802162	W5F714	Protein kinase domain-containing protein		19	7	490	53.8	6.23	metabolic process		catalytic activity;nucleotide binding;protein binding
1.6693	0.0214139	0.801847	A0A096UN06	Peroxidase (EC 1.11.1.7)	CAMPLR22A2D_LOCUS4516	32	9	362	37.5	6.77	metabolic process;response to stimulus	extracellular	antioxidant activity;catalytic activity;metal ion binding
1.90168	0.0125407	0.80182	A0A3B6C954	MI domain-containing protein		49	30	789	86.5	8.02
2.15784	0.00695276	0.801629	A0A3B6RJH1	Polyadenylate-binding protein (PABP)		32	14	662	71.4	6.95
1.80781	0.0155665	0.801249	A0A3B6C0C8	Peroxidase (EC 1.11.1.7)		15	3	314	33.1	6.86
1.97424	0.010611	0.800906	A0A3B6GRD4	Uncharacterized protein		38	19	808	88.5	4.54
1.97489	0.0105952	0.800623	A0A3B6EGX5	Aldo_ket_red domain-containing protein		33	8	341	37.7	6.9
2.37927	0.00417573	0.799619	A0A1D5XAT0	Uncharacterized protein		35	5	199	21.4	7.28			catalytic activity;nucleotide binding
1.77945	0.0166169	0.798784	A0A3B6B057	Uncharacterized protein		20	9	535	57.6	8.19
2.07457	0.00842222	0.798478	A0A2X0S5X8	Aldo_ket_red domain-containing protein	CAMPLR22A2D_LOCUS2716	44	12	347	37.8	6.19
2.38822	0.0040905	0.798401	A0A077RX76	Uncharacterized protein	TRAES_3BF096800100CFD_c1	67	20	419	46.4	6.05			catalytic activity
3.8778	0.000132494	0.798338	A0A3B5YVW2	Uncharacterized protein		20	16	1028	112.7	5.86
2.31786	0.00480991	0.797537	A0A1D5V328	Uncharacterized protein	CAMPLR22A2D_LOCUS1524	60	7	162	18.1	4.41		mitochondrion
1.42916	0.0372253	0.797481	A0A3B6I3B8	Uncharacterized protein		8	3	598	66.3	6.48
1.61713	0.0241473	0.797427	A0A3B6JLJ5	Uncharacterized protein		14	4	442	49.1	5.14
2.05292	0.0088528	0.796428	A0A3B6B6V7	Uncharacterized protein		37	6	292	32.3	6.25
2.4853	0.00327111	0.795775	A0A3B6LKG2	Uncharacterized protein		20	6	402	42.8	7.91
2.39527	0.00402464	0.795312	A0A3B6U9R7	Nudix hydrolase domain-containing protein		49	5	214	23.7	5.48
2.24829	0.00564558	0.795234	A0A3B6JRR9	Coatomer subunit alpha		49	44	1218	135.9	7.01
2.57259	0.00267554	0.795126	A0A3B6EEF6	Uncharacterized protein		45	4	121	13.7	7.18
1.53081	0.0294569	0.794993	A7BJ77	Xylanase inhibitor	Xip-R1	41	8	297	32.9	8.28	metabolic process		catalytic activity
1.75821	0.0174498	0.793955	A0A3B6JFL7	Clathrin heavy chain		59	72	1715	194	5.34
1.37848	0.0418327	0.793741	A0A3B6LU07	Succinate dehydrogenase [ubiquinone] flavoprotein subunit, mitochondrial (EC 1.3.5.1)		49	19	621	68.2	6.57
2.58189	0.00261882	0.793206	A0A3B6QIX8	Uncharacterized protein		52	6	165	17.6	8.91
1.63572	0.0231357	0.792913	A0A3B6FRH4	Beta-adaptin-like protein		32	15	841	92.7	5.38
1.96107	0.0109378	0.791643	A0A3B5ZSR1	Uncharacterized protein		34	9	489	53.2	5.26
1.67213	0.021275	0.791639	A0A7H4LRG2			42	4	214	23.7	6.23
3.28576	0.000517887	0.789561	A0A3B6LTG4	UDP-glucose 6-dehydrogenase (EC 1.1.1.22)		72	22	480	52.6	6.18
1.44599	0.0358105	0.78932	A0A3B5ZTV7	PCI domain-containing protein		44	11	385	43.5	5.9
3.97818	0.000105152	0.788749	A0A3B6EDX0	Uncharacterized protein		53	21	501	56.7	8.73
2.13713	0.0072924	0.788544	A0A3B6RG17	Uncharacterized protein		16	3	263	28.9	8.22
2.18563	0.00652178	0.788417	A0A3B6D9L9	Arogenate dehydratase (EC 4.2.1.91)		21	3	382	41.4	6.9
2.74974	0.00177934	0.788357	A0A3B6RFV0	Sec8_exocyst domain-containing protein		23	14	1053	116.7	5.85
1.37475	0.0421938	0.788238	A0A3B6B7M3	Glutamine synthetase (EC 6.3.1.2)		45	12	423	46.1	6.27
1.6284	0.0235287	0.787473	A0A3B5Y0J6	B5 domain-containing protein		25	9	594	66.7	5.62
2.47372	0.00335958	0.78711	A0A3B6RNF9	RRM domain-containing protein		8	2	249	26.1	8.38
2.05773	0.00875529	0.787029	W5C7G6	Eukaryotic translation initiation factor 6 (eIF-6)	EIF6	45	6	245	26.5	4.86	cell organization and biogenesis;metabolic process	cytoplasm;nucleus	RNA binding
2.16055	0.00690963	0.785402	A0A3B6MKW7	Importin N-terminal domain-containing protein		52	25	872	95.8	4.75
2.17499	0.00668353	0.78477	A0A3B6KFJ8	Signal recognition particle subunit SRP68 (SRP68)		28	11	600	68.1	8.65
3.29415	0.000507983	0.783214	A0A3B6HUP0	Uncharacterized protein		38	8	336	37	6.7
1.6584	0.0219584	0.782873	A0A1D6CTX7	Protein kinase domain-containing protein		17	3	326	36.8	6.7	metabolic process		catalytic activity;nucleotide binding
1.64051	0.0228817	0.782444	A0A077RZ03	Uncharacterized protein	TRAES_3BF118100070CFD_c1	16	5	415	44.9	8.05			RNA binding
3.00565	0.000987069	0.781327	W5D6Q0	Exocyst complex component	TRAES_3BF087300080CFD_c1	15	8	806	88.5	6.93	cell growth;cell organization and biogenesis;transport	cytosol;membrane
2.79693	0.00159614	0.77979	A0A3B6B9S5	Importin N-terminal domain-containing protein		49	24	897	99	4.88
3.16868	0.000678134	0.778061	A0A3B6LKJ0	Uncharacterized protein		55	16	398	40.8	6.57
3.2639	0.000544632	0.777497	A0A1D5UIU1	PCI domain-containing protein	CAMPLR22A2D_LOCUS2628	58	17	425	47.4	5.83			protein binding
1.48764	0.0325354	0.77529	A0A3B6NQQ1	Uncharacterized protein		10	4	670	68.4	5.44
1.9447	0.0113579	0.774749	A0A3B6TFH3	NAD(P)-bd_dom domain-containing protein		14	2	354	38.2	5.29
1.87028	0.0134809	0.774686	A0A3B5YYD8	Uncharacterized protein		31	17	903	99.8	5.82
2.25285	0.00558668	0.77398	A0A3B6IRA0	Uncharacterized protein		33	14	721	81.6	7.33
3.16776	0.000679579	0.773864	A0A3B6KDV3	Uncharacterized protein		49	13	423	46.8	5.72
2.58576	0.00259564	0.773776	A0A3B6MPM9	Uncharacterized protein		16	4	463	51.4	4.82
4.00799	9.81771e-05	0.772659	A0A3B5ZTU4	Uncharacterized protein		7	4	1161	129.4	5.69
1.33833	0.0458849	0.77131	A0A3B5YQW9	WD_REPEATS_REGION domain-containing protein		22	5	343	38	8.24
2.41133	0.00387857	0.771181	A0A3B6D814	WD_REPEATS_REGION domain-containing protein		38	27	1111	120.1	5.27
2.67357	0.00212046	0.77083	A0A1D5UPJ6	Pyruvate kinase (EC 2.7.1.40)	CAMPLR22A2D_LOCUS5537	61	21	514	55.4	8.06	metabolic process		catalytic activity;metal ion binding
1.96727	0.0107827	0.770464	A0A3B6LKX6	Uncharacterized protein		25	18	915	99.4	7.06
4.04032	9.1134e-05	0.769662	A0A1D6D1Q3	Pyrophosphate--fructose 6-phosphate 1-phosphotransferase subunit beta (PFP) (EC 2.7.1.90) (6-phosphofructokinase, pyrophosphate dependent) (PPi-PFK) (Pyrophosphate-dependent 6-phosphofructose-1-kinase)	PFP-BETA	73	27	560	60.5	6.2	metabolic process	cytoplasm	catalytic activity;metal ion binding;nucleotide binding
2.38829	0.00408985	0.768215	A0A3B6A021	Uncharacterized protein		58	9	288	30.6	9.31
2.19184	0.00642925	0.768022	G0Z6F1	26s proteasome non-ATPase regulatory subunit	TRAES_3BF102700120CFD_c1	69	12	307	34.2	6.46	metabolic process	proteasome	catalytic activity;protein binding
2.46661	0.00341499	0.767249	A0A3B6PSV9	Epimerase domain-containing protein		56	16	414	44.7	9.35
3.45523	0.000350567	0.7667	A0A3B6DBF8	Usp domain-containing protein		61	9	257	27.2	5.06
1.94923	0.0112401	0.76665	A0A3B6TBF6	Uncharacterized protein		45	12	265	29.2	9.85
4.17958	6.6133e-05	0.766548	A0A1D5URS1	Adenosylhomocysteinase (EC 3.3.1.1)	CAMPLR22A2D_LOCUS4880	74	25	485	53.2	6.05	metabolic process		catalytic activity;nucleotide binding
1.64998	0.0223883	0.766005	A0A3B5Z5Y3	Uncharacterized protein		9	2	312	33.3	5.26
1.32913	0.0468671	0.765805	A0A3B6MZF6	Uncharacterized protein		25	6	372	38.8	7.11
1.69544	0.0201634	0.765487	A0A3B6PQ18	Peptidylprolyl isomerase (EC 5.2.1.8)		17	2	195	20.5	9.26
3.59592	0.000253559	0.763782	A0A3B6AYU2	PCI domain-containing protein		17	3	196	22.1	5.97
1.31954	0.047914	0.762599	A0A3B5XUD5	YTH domain-containing protein		9	3	475	52.6	7.53
1.31627	0.0482761	0.762396	A0A3B5YXC5	DNA ligase (EC 6.5.1.1)		11	5	792	87.4	8.81
3.60951	0.000245745	0.762092	A0A3B6HUY3	Laccase (EC 1.10.3.2) (Benzenediol:oxygen oxidoreductase) (Diphenol oxidase) (Urishiol oxidase)		6	2	600	65.4	8.15
3.25421	0.000556913	0.7619	A0A3B6QCR6	VID27 domain-containing protein		30	10	648	70.6	6.32
1.84101	0.0144209	0.761315	A0A3B6PTD8	F-box domain-containing protein		20	4	297	32.8	5.34
2.76074	0.00173484	0.76072	A0A3B6C253	Importin N-terminal domain-containing protein		13	8	1016	114.1	5.63
4.18077	6.59525e-05	0.760536	A0A3B6SG63	ANK_REP_REGION domain-containing protein		63	13	339	36.6	4.54
2.43714	0.00365477	0.759767	A0A7H4LJZ5			54	32	788	86.2	8.02
2.09139	0.00810224	0.759708	A0A3B6ET24	Uncharacterized protein		42	4	104	11.6	10.37
2.494	0.00320626	0.758689	A0A3B6H0W1	Uncharacterized protein		57	16	412	44.4	5.54
2.60689	0.00247237	0.758282	A0A3B5Z2H5	6-phosphogluconate dehydrogenase, decarboxylating (EC 1.1.1.44)		66	18	501	53.9	5.87
1.99048	0.0102215	0.757673	A0A3B6TBN7	Uncharacterized protein		10	3	555	64	6.25
2.83795	0.00145229	0.75765	A0A3B6GWL3	Protein kinase domain-containing protein		11	5	967	103.9	7.43
1.89674	0.0126841	0.757042	F8WTQ7	Delta-aminolevulinic acid dehydratase (EC 4.2.1.24)	TaALAD1d	46	12	428	46.2	5.83	metabolic process		catalytic activity;metal ion binding
1.39118	0.040628	0.756057	A0A3B6PKW5	Uncharacterized protein		8	2	413	43.8	4.92
1.64481	0.0226564	0.754966	A0A3B6QLX2	Uncharacterized protein		13	2	305	33.1	9.36
3.19399	0.000639747	0.75458	W5DWP7	Uncharacterized protein		26	2	91	10.1	10.15
1.58253	0.0261497	0.754156	A0A3B6TDT1	UVR domain-containing protein		13	9	795	86.2	4.67
2.7443	0.00180179	0.753273	A0A3B6C448	BSD domain-containing protein		7	2	449	48.5	4.37
2.14209	0.00720955	0.752837	A0A3B6CHB5	Peroxidase (EC 1.11.1.7)		43	10	341	36.5	6.13
2.3809	0.00416002	0.75238	A0A3B6JLE1	AAI domain-containing protein		23	3	196	19.6	6.49
2.45692	0.00349205	0.752186	A0A3B6MPW1	Phosphoinositide phospholipase C (EC 3.1.4.11)		28	10	589	65.6	6.51
2.6625	0.00217523	0.751011	A0A3B6KAJ3	Uncharacterized protein		73	23	446	48	5.68
2.453	0.00352375	0.750679	A0A3B6NLL1	Aconitase domain-containing protein		35	10	510	55.1	6.9
3.0092	0.000979047	0.74971	A0A3B5Z2Y5	ENTH domain-containing protein		21	6	564	62.4	5.21
2.93224	0.00116886	0.749617	A0A3B5XZQ6	Uncharacterized protein		29	10	568	58.3	4.89
1.80074	0.015822	0.747683	A0A3B5Y233	Nudix hydrolase domain-containing protein		11	2	297	33	6.24
1.9935	0.0101509	0.747566	A0A3B6MNX3	Uncharacterized protein		14	4	414	46.6	5.1
2.06056	0.00869846	0.747403	Q00810	Cytochrome c oxidase subunit 2 (Fragment)	COX2	17	3	260	29.5	4.93	metabolic process;transport	membrane;mitochondrion	catalytic activity;metal ion binding;transporter activity
3.03138	0.000930289	0.745728	A0A3B6QEK2	Uncharacterized protein		28	4	240	25.6	5.78
1.39353	0.0404083	0.745632	A0A1D5Y0E3	UBIQUITIN_CONJUGAT_2 domain-containing protein		60	4	161	18	8.28	metabolic process		catalytic activity;nucleotide binding
1.90487	0.0124488	0.74417	A0A3B6UBD1	Tubulin beta chain		68	24	448	50.2	4.83
2.36084	0.00435669	0.742354	A0A3B5XXN8	Uncharacterized protein		65	29	574	61.1	5.55
3.21587	0.000608323	0.740267	A0A3B6HY51	Uncharacterized protein		30	49	2621	286.5	7.33
1.63849	0.0229885	0.739345	A0A1D6D5I2	ACB domain-containing protein		48	4	92	10	5.5
1.95135	0.0111853	0.739079	B4F6F4	Peroxidase (EC 1.11.1.7)	prc1	65	14	314	32.5	8.24	metabolic process;response to stimulus	extracellular	antioxidant activity;catalytic activity;metal ion binding
1.99452	0.0101269	0.738526	A0A3B6SBI7	Glycosyltransferase (EC 2.4.1.-)		22	7	474	50.6	5.58
2.02621	0.00941443	0.738442	A0A3B6JQB4	Uncharacterized protein		15	4	392	40.9	8.72
1.3976	0.0400315	0.737682	A0A3B6JLT7	Uncharacterized protein		27	17	872	99	5.01
1.80794	0.0155619	0.737373	W5EP45	Ribosomal protein S25		36	4	108	12.1	10.56		ribosome
1.32061	0.0477954	0.735471	A0A3B6MJZ8	Cysteine synthase (EC 2.5.1.47)		78	16	325	34.1	5.77
2.69715	0.00200839	0.734772	A0A3B6CGX2	Nudix hydrolase domain-containing protein		48	5	217	24	5.48
2.04106	0.00909794	0.734763	A0A3B6PNM5	Aminotran_1_2 domain-containing protein		36	8	422	46.8	7.66
1.50685	0.0311282	0.734481	A0A3B6QAR8	Eukaryotic translation initiation factor 3 subunit F (eIF3f) (eIF-3-epsilon)		48	9	292	31.8	5.16
3.44347	0.000360185	0.734407	A0A3B6H6V6	Uncharacterized protein		40	8	329	35.8	6.24
1.87326	0.0133887	0.73433	A0A3B6IPC0	Uncharacterized protein		17	4	478	53.5	7.49
2.34636	0.00450438	0.731844	A0A3B5Y5D9	Uncharacterized protein		48	24	747	81.1	5.82
3.65643	0.00022058	0.731282	A0A3B6JMJ4	Uncharacterized protein		45	7	245	27.8	4.96
2.61623	0.00241974	0.731125	A0A3B6AQG1	Pyruvate dehydrogenase E1 component subunit alpha (EC 1.2.4.1)		40	13	421	45.9	6.84
1.7543	0.0176076	0.730882	A0A3B6AX74	SAM_MT_TRM5_TYW2 domain-containing protein		5	4	1087	119.1	7.52
2.20743	0.00620254	0.730367	A0A3B6EPN2	Uncharacterized protein		27	3	213	23.3	6.43
1.8745	0.0133506	0.729181	A0A3B5ZZB0	Protein kinase domain-containing protein		14	8	964	104.1	7.75
1.8	0.0158489	0.727857	A0A3B5ZZQ4	MPN domain-containing protein		19	4	462	50.4	5.92
2.66985	0.0021387	0.726705	A0A3B6GQG3	Uncharacterized protein		28	3	178	19.8	9.33
3.16439	0.000684878	0.726478	A0A3B6B298	Thioredoxin domain-containing protein		19	3	184	19.5	9
1.42147	0.0378902	0.723399	A0A3B6KQP4	Uncharacterized protein		23	5	362	39.7	4.81
2.48592	0.00326651	0.719919	A0A3B5Y6E6	GFO_IDH_MocA domain-containing protein		16	4	369	39.6	5.94
1.65115	0.0223281	0.719598	A0A3B6SCG1	Thioredoxin domain-containing protein		32	5	230	26.1	5.78
1.81725	0.0152319	0.71864	A0A1D6S1Y9	Uncharacterized protein		55	4	153	17.1	10.13	metabolic process	ribosome	RNA binding;structural molecule activity
1.48415	0.0327979	0.718374	A0A3B6KLP1	Cysteine synthase (EC 2.5.1.47)		31	10	380	40.4	7.58
2.75559	0.00175554	0.71442	A0A3B6RK39	Epimerase domain-containing protein		35	7	323	35.1	6.43
2.14932	0.00709063	0.713801	Q5I7L1	Ribosomal protein L13a		38	8	206	23.5	10.39	metabolic process	ribosome	structural molecule activity
3.47037	0.000338554	0.713305	A0A3B6FKR5	Importin N-terminal domain-containing protein		50	27	981	108.1	5.39
1.68182	0.0208054	0.713218	A0A3B6A1E9	Uncharacterized protein		29	6	216	24.1	5.95
1.8499	0.0141287	0.713044	A0A3B6SPB2	Mitogen-activated protein kinase (EC 2.7.11.24)		23	7	578	65.2	7.31
2.82828	0.00148498	0.712563	A0A3B6HW60	Uncharacterized protein		62	27	652	70.2	7.33
2.56526	0.00272109	0.711806	A0A3B6LZ71	Uncharacterized protein		51	8	234	26.3	9.29
1.562	0.0274155	0.711527	A0A3B6LPQ1	Ribulose-phosphate 3-epimerase (EC 5.1.3.1)		49	4	230	24.4	5.82
2.59937	0.00251555	0.711144	A0A3B6SIC6	J domain-containing protein		26	6	394	43.6	5.36
1.84537	0.0142769	0.710029	A0A3B6AZX0	Acyl-[acyl-carrier-protein] desaturase (EC 1.14.19.-)		25	6	392	44.6	6.47
3.19744	0.000634682	0.709654	A0A1D5YF62	Uncharacterized protein		73	33	648	71.2	5.21			nucleotide binding
2.79763	0.00159355	0.709358	Q84U07	Acetolactate synthase (EC 2.2.1.6) (Fragment)	imi2	36	12	598	64.6	6.27	metabolic process		catalytic activity;metal ion binding;nucleotide binding
3.03344	0.000925888	0.707613	A0A3B5YYM8	AIG1-type G domain-containing protein		3	3	1074	116.8	4.82
1.38142	0.0415505	0.707047	A0A3B6DCX5	Glutamine amidotransferase type-1 domain-containing protein		12	10	1394	152.9	5.43
2.15387	0.00701665	0.705579	A0A3B6H2R9	PfkB domain-containing protein		77	19	323	34.7	5.82
2.89474	0.00127425	0.705343	A0A3B6BXM4	Oxidored_FMN domain-containing protein		74	18	369	40.7	6.48
2.23106	0.00587406	0.705124	A0A3B6C6N4	Uncharacterized protein		14	4	464	51.8	6.11
3.87575	0.000133121	0.701691	A0A173FEH2	TSK1 protein	tsk1	54	6	175	19	4.56	metabolic process
1.69961	0.0199707	0.700495	A0A3B6JNR3	Uncharacterized protein		14	9	874	95	5.72
1.91959	0.0120341	0.699154	A0A3B5ZMD9	Uncharacterized protein		52	8	223	24.2	5.39
2.95085	0.00111982	0.698949	A0A3B6HQI0	AAA domain-containing protein		33	11	450	49.7	6.21
2.60738	0.00246956	0.697756	A0A3B5YXF2	MFS domain-containing protein		27	13	743	79.1	4.96
3.35429	0.000442289	0.697162	A0A3B6R960	Profilin		92	7	131	14.2	5.05
2.1132	0.00770555	0.696795	A0A3B6IRG6	Uncharacterized protein		65	28	648	71.1	5.16
1.40058	0.0397577	0.696476	A0A3B5ZVH8	Uncharacterized protein		36	7	296	30.4	9.54
1.41653	0.0383241	0.695834	A0A3B5XYT2	Uncharacterized protein		6	2	596	65.5	7.11
2.46173	0.00345359	0.695203	Q5I7K2	40S ribosomal protein S7		55	9	192	22.2	9.79	metabolic process	ribosome	structural molecule activity
2.17244	0.00672297	0.694473	A0A3B6B2S4	Uncharacterized protein		24	11	577	64.6	7.2
1.44807	0.0356394	0.693361	Q4VWF0	Histidine-containing phosphotransfer protein		18	2	148	16.2	5.11	regulation of biological process;response to stimulus		signal transducer activity
2.1464	0.00713846	0.690592	A0A3B5YZM3	PH domain-containing protein		37	3	164	18.3	7.34
1.3626	0.043391	0.690183	A0A3B6S9X3	Uncharacterized protein		13	4	482	52	6.54
1.75299	0.0176607	0.689123	A0A3B5Z2J5	Usp domain-containing protein		49	9	268	28	5.94
1.42101	0.037931	0.688807	A0A3B6AQY3	Uncharacterized protein		46	10	401	41	5.99
1.38824	0.0409035	0.686882	A0A077RU01	Uncharacterized protein	TRAES_3BF111600200CFD_c1	21	8	573	60.2	6.55	metabolic process	cytosol	catalytic activity;metal ion binding
2.29618	0.00505614	0.685827	A0A3B6SDN2	Pyruvate dehydrogenase E1 component subunit beta (EC 1.2.4.1)		39	9	369	39.5	5.48
2.87925	0.00132054	0.685103	A0A1D6RE03	Usp domain-containing protein		70	13	166	18.1	6.79	response to stimulus
1.81684	0.0152461	0.684196	A0A3B6FWB8	Rab-GAP TBC domain-containing protein		20	11	831	93.6	4.84
2.06932	0.00852473	0.68415	A0A3B6GRE0	Peroxidase (EC 1.11.1.7)		41	8	333	35.9	7.34
2.02368	0.00946938	0.684126	A0A3B6FRF6	Protein VACUOLELESS1		7	4	871	95.6	6.13
2.57625	0.00265308	0.683722	A0A3B6SRY9	DNA polymerase alpha subunit B		14	5	622	69.3	5.38
1.47917	0.0331762	0.682528	A0A3B6C3S2	Elongator complex protein 1		5	5	1324	147	5.78
2.3338	0.00463665	0.681581	Q5I7K5	Ribosomal protein P1		73	6	110	11.2	4.59	metabolic process	ribosome	structural molecule activity
1.75967	0.0173912	0.680935	A0A3B6DL62	diacylglycerol kinase (EC 2.7.1.107)		15	5	498	55	7.05
2.71989	0.00190593	0.680348	A0A1D6CA07	Cytosolic Fe-S cluster assembly factor NBP35	NBP35	34	7	348	37.1	5.14	cell organization and biogenesis;metabolic process	cytoplasm	metal ion binding;nucleotide binding
1.88094	0.013154	0.679495	W5HLM1	Uncharacterized protein		32	4	119	13.8	11.49	metabolic process	ribosome	structural molecule activity
3.2537	0.000557565	0.67862	W5D1A8	Amidohydro-rel domain-containing protein	TRAES_3BF012600030CFD_c1	24	6	400	44.1	8.18	metabolic process		catalytic activity
3.02386	0.000946536	0.678479	A0A3B6MP06	Pyruvate carboxyltransferase domain-containing protein		51	20	627	67.2	6.77
1.45899	0.0347548	0.678466	A0A3B6C161	Protein kinase domain-containing protein		11	5	788	81.6	7.78
2.52369	0.0029944	0.675447	A0A3B5XUJ2	PKS_ER domain-containing protein		34	7	394	42.3	6.24
2.06508	0.00860839	0.674762	A0A3B6N318	Elongation factor Tu		55	18	451	48.3	6.4
2.30913	0.00490762	0.674577	A0A341WWT4	Vacuolar protein sorting-associated protein 29		26	4	200	22.2	6.93
2.3099	0.00489895	0.674033	A0A3B6RGX3	Tryptophan synthase (EC 4.2.1.20)		30	9	470	50.3	6.71
3.66417	0.000216685	0.673304	W5AVS5	MPN domain-containing protein		77	16	310	34.8	6.6			protein binding
1.30617	0.0494121	0.672884	A0A3B6KNW8	GCK domain-containing protein		25	3	203	20.7	4.22
1.45714	0.0349029	0.672728	A0A3B6NKF5	tRNA-synt_1c domain-containing protein		9	3	559	61.7	7.36
2.23166	0.00586591	0.672477	A0A3B6QKT3	GalP_UDP_transf domain-containing protein		11	3	348	38.4	6.62
1.74359	0.0180471	0.672145	A0A3B6IP57	Eukaryotic translation initiation factor 3 subunit I (eIF3i)		58	13	326	36.2	6.96
1.49534	0.0319636	0.672088	A0A3B6AUJ9	KH type-2 domain-containing protein		38	7	230	25.5	9.69
2.52567	0.00298075	0.6713	A0A3B6SNL3	Uncharacterized protein		14	2	222	24.7	8.29
2.42858	0.0037275	0.670767	W5EGE3	Uncharacterized protein		67	5	111	12.2	8.47	metabolic process;transport	membrane;mitochondrion	catalytic activity;metal ion binding
2.35495	0.00441623	0.670628	A0A077RUE3	Uncharacterized protein	TRAES_3BF030400110CFD_c1	18	2	224	24.4	4.7
1.62627	0.0236446	0.670564	A0A3B6MY94	SWIB domain-containing protein		24	2	139	14.9	10.83
2.21011	0.00616442	0.665612	A0A3B6N1G9	Uncharacterized protein		19	2	155	16.7	5.88
2.34336	0.00453566	0.664244	A0A3B6RCJ8	Proteasome subunit beta (EC 3.4.25.1)		63	11	246	26.2	5.78
3.0596	0.000871764	0.664026	A0A3B6C702	Thioredoxin domain-containing protein		48	8	262	28.3	6.79
1.50846	0.0310129	0.663609	A0A3B6B848	Anamorsin homolog (Fe-S cluster assembly protein DRE2 homolog)		58	9	267	27.9	4.89
1.30746	0.0492656	0.663279	A0A3B6KIR6	Uncharacterized protein		9	5	774	89.4	9.14
3.21364	0.000611451	0.662937	A0A3B6R9V5	Ribonucleoside-diphosphate reductase (EC 1.17.4.1)		52	29	816	91.7	7.03
2.27728	0.0052811	0.662688	A0A1D5V0J3	PPM-type phosphatase domain-containing protein	CAMPLR22A2D_LOCUS2180	57	12	290	31.9	6.48	metabolic process		catalytic activity
2.74523	0.00179791	0.66252	A0A3B5Z5S1	Ketol-acid reductoisomerase (EC 1.1.1.86) (Acetohydroxy-acid reductoisomerase) (Alpha-keto-beta-hydroxylacyl reductoisomerase)		52	22	595	64.4	6.77
1.34964	0.0447049	0.661414	A0A3B6MXY8	Uncharacterized protein		14	5	540	59.3	8.32
2.46648	0.00341598	0.661376	A0A3B6RH73	DUF953 domain-containing protein		55	5	130	14.4	4.98
1.73081	0.018586	0.661061	A0A077S075	Cog4 domain-containing protein	TRAES_3BF116200110CFD_c1	8	4	760	83.9	5.4	transport
1.96208	0.0109125	0.660588	A0A3B6RIP1	Uncharacterized protein		26	13	798	87.7	6.1
2.29759	0.00503975	0.659665	A0A3B5XW23	Kinesin-like protein		18	8	745	83.3	5.44
3.00237	0.000994556	0.659502	A0A3B6EIL8	Glyco_transf_20 domain-containing protein		36	21	912	102.2	5.57
1.52448	0.0298896	0.659073	A0A3B6RDH4	Uncharacterized protein		23	7	593	65.9	5.22
1.50886	0.0309843	0.659049	A0A3B6HZY1	Uncharacterized protein		12	5	555	61.2	7.72
1.73925	0.0182284	0.658558	Q7X9K1	Ribosomal Pr 117 (Fragment)		52	6	147	15.7	10.48	metabolic process	ribosome	structural molecule activity
2.93361	0.00116517	0.655831	A0A3B6PSA8	CYTOSOL_AP domain-containing protein		62	20	533	55.3	5.8
2.83928	0.00144785	0.655719	A5HE90	Hypersensitive response protein	hir1	35	7	284	31.3	5.44		membrane
2.90331	0.00124937	0.655718	A4K4Y8	Tubulin alpha chain	TUBA-4A TUBA-4B	55	17	451	49.8	4.96	cell organization and biogenesis	cytoplasm;cytoskeleton	catalytic activity;nucleotide binding;structural molecule activity
2.55629	0.00277785	0.655695	A0A3B6MWE3	DUF3700 domain-containing protein		72	12	252	26.4	6.11
2.77762	0.00166869	0.652853	A0A3B6LYJ8	Epimerase domain-containing protein		52	10	330	36.3	6.79
1.56239	0.0273912	0.65263	A0A3B6JD31	Uncharacterized protein		10	3	450	46.6	6.11
2.13655	0.00730211	0.652628	A0A077RSP3	PITH domain-containing protein	TRAES_3BF105700010CFD_c1	21	2	204	22.6	5.06
1.91448	0.0121765	0.651711	A0A3B6MK10	Uncharacterized protein		32	11	519	55.3	4.92
2.89641	0.00126938	0.650784	A0A7H1K1W8			49	6	168	18.2	7.72
2.64601	0.00225937	0.649239	A0A3B6KJK8	Protein transport protein SEC23		29	14	762	84.3	5.5
2.54492	0.00285151	0.648977	A0A3B5ZYX7	Uncharacterized protein		46	14	499	53.7	6.3
2.16944	0.0067696	0.648128	A0A3B6CGF3	WD_REPEATS_REGION domain-containing protein		62	13	317	33.9	5.78
2.32076	0.00477791	0.646959	S4Z3F2	ATP synthase subunit alpha, chloroplastic (EC 7.1.2.2) (ATP synthase F1 sector subunit alpha) (F-ATPase subunit alpha)	atpA	21	7	504	55.3	6.48	metabolic process;transport	membrane	catalytic activity;nucleotide binding;transporter activity
4.08676	8.18919e-05	0.646925	A0A3B6FPZ0	Proteasome subunit alpha type (EC 3.4.25.1)		45	7	242	26.6	5.48
1.53665	0.0290635	0.646509	A0A3B5YXF8	Uncharacterized protein		16	2	173	19.2	9.01
2.39717	0.00400705	0.645942	A0A3B6TFF6	Uncharacterized protein		47	12	396	42.8	5.39
1.38682	0.0410373	0.645389	A0A3B6KFB8	NAD(P)-bd_dom domain-containing protein		35	5	294	31.2	9.57
1.33863	0.0458531	0.645017	A0A3B6EL68	LRRNT_2 domain-containing protein		14	2	211	22.6	6.19
3.0008	0.000998162	0.644881	A0A3B6MP73	HATPase_c domain-containing protein		41	27	957	107.2	7.09
4.17451	6.69092e-05	0.644162	A0A3B6ILN0	Pyr_redox_2 domain-containing protein		46	14	435	46.3	5.36
1.39438	0.0403297	0.643986	A0A3B6THP6	Uncharacterized protein		24	7	582	64.7	5.22
3.52547	0.000298212	0.642406	A0A1D5V177	AAA domain-containing protein	CAMPLR22A2D_LOCUS710	73	17	415	46.2	6.07	metabolic process;regulation of biological process	cytoplasm	catalytic activity;nucleotide binding
1.72361	0.0188969	0.642399	A0A3B6LDG2	Malate dehydrogenase (EC 1.1.1.37)		54	10	358	37.2	8.16
1.50421	0.0313181	0.642266	A0A3B6HWW4	Uncharacterized protein		9	2	433	48.4	5.77
1.34258	0.0454385	0.642125	A0A3B6KNZ6	Uncharacterized protein		3	3	1404	142.7	9.48
2.48926	0.00324145	0.641558	P38076	Cysteine synthase (EC 2.5.1.47) (CSase A) (O-acetylserine (thiol)-lyase) (OAS-TL A) (O-acetylserine sulfhydrylase)	CYS1	74	17	325	34.1	5.57	metabolic process	cytoplasm	catalytic activity
1.64553	0.0226189	0.641431	A0A3B6TDP7	DSBA domain-containing protein		22	4	242	27.2	8.22
1.65953	0.0219015	0.640676	A0A3B6AWP4	Uncharacterized protein		31	8	463	50.8	5.86
1.91763	0.0120886	0.639361	A0A3B6GLN9	tRNA (adenine(58)-N(1))-methyltransferase non-catalytic subunit TRM6		8	2	404	43.5	6.37
1.93154	0.0117073	0.639358	A0A3B6JLA3	Uncharacterized protein		43	8	332	36.3	7.02
2.37662	0.00420131	0.638748	A0A3B6CGH9	Uncharacterized protein		27	14	845	92.8	5.12
1.34269	0.0454263	0.635787	A0A077S1E6	Pyruvate kinase (EC 2.7.1.40)	TRAES_3BF028500040CFD_c1 TRAES_3BF031200070CFD_c1	27	10	577	63	6.4	metabolic process;response to stimulus	mitochondrion	catalytic activity;metal ion binding
2.04619	0.00899102	0.635677	A0A3B6A086	Inositol-tetrakisphosphate 1-kinase (EC 2.7.1.134)		49	8	350	37.1	5.22
2.79918	0.0015879	0.633272	A0A1D5WIS4	Fructose-bisphosphate aldolase (EC 4.1.2.13)	FBA15	80	26	358	38.8	7.21	metabolic process		catalytic activity
2.57046	0.00268866	0.631423	A0A077S6P0	Aminotran_1_2 domain-containing protein	TRAES_3BF010800080CFD_c1	14	7	757	82.4	8.65	metabolic process	membrane	catalytic activity
2.47104	0.00338035	0.631027	A0A3B6DDY7	Uncharacterized protein		26	6	322	33.2	9.1
2.83569	0.00145985	0.630948	A0A3B6QNX0	Uncharacterized protein		30	9	423	45.1	9.39
2.90468	0.00124543	0.630574	A0A3B6RK46	Uncharacterized protein		42	12	402	44.6	6.44
1.87647	0.0132901	0.629234	A0A3B6LL03	HTH myb-type domain-containing protein		10	2	286	31	6.13
2.10605	0.00783348	0.627329	A0A3B6GU25	Uncharacterized protein		33	9	440	44	8.46
2.42344	0.0037719	0.626914	A0A0C4BKA8	AAA domain-containing protein		56	18	418	46.7	8.98	metabolic process;response to stimulus	cytoplasm	catalytic activity;nucleotide binding;RNA binding
1.80648	0.0156144	0.626855	A0A3B6RSF4	Uncharacterized protein		50	9	298	33.2	6.47
2.04727	0.00896866	0.625859	A0A3B6KTP8	Protein kinase domain-containing protein		22	8	524	58.4	6.64
1.76413	0.0172135	0.625595	A0A3B6C518	Uncharacterized protein		28	7	296	31.8	7.71
1.6655	0.0216023	0.624923	A0A3B6C789	Uncharacterized protein		29	4	229	24.9	7.46
2.52403	0.00299207	0.624725	A0A3B6SFX4	Uncharacterized protein		24	4	256	28.2	7.91
1.77411	0.0168224	0.624586	A0A3B6QH39	Uncharacterized protein		19	8	470	51.2	8.06
1.59844	0.0252093	0.624561	A0A3B6LRA4	WD_REPEATS_REGION domain-containing protein		29	7	408	44.5	4.94
2.81616	0.001527	0.624534	A0A3B6QKG9	Uncharacterized protein		21	5	408	44.5	5.52
2.35652	0.00440029	0.62445	A0A3B6KQ52	Uncharacterized protein		13	3	355	40.5	6.28
2.30836	0.00491634	0.624434	A0A3B6IWU9	PCI domain-containing protein		49	18	488	55	8.02
3.65882	0.000219372	0.619969	Q8GVD3	Thioredoxin		49	5	118	12.7	5.49	cellular homeostasis;metabolic process;regulation of biological process;response to stimulus;transport		antioxidant activity;catalytic activity;enzyme regulator activity
2.32104	0.00477486	0.619826	A0A3B6KAC6	Uncharacterized protein		45	6	222	24.7	6.79
3.28496	0.000518852	0.618787	A0A3B5YZL3	Uncharacterized protein		79	7	112	11.4	4.34
1.41505	0.0384549	0.618175	A0A3B6PG16	Uncharacterized protein		51	14	238	27.1	8.12
2.40744	0.00391341	0.617443	A0A3B6HT34	Importin N-terminal domain-containing protein		21	13	1046	115.2	5.01
1.34432	0.0452563	0.616946	A0A3B6KEY8	Protein transport protein Sec61 subunit beta		28	2	111	11.1	11.93
1.86469	0.0136556	0.616822	A0A3B5Y4H9	Inositol-tetrakisphosphate 1-kinase (EC 2.7.1.134)		50	7	332	35.5	5.3
2.44477	0.00359108	0.61637	A0A3B6BZN8	UBA_e1_C domain-containing protein		31	19	1064	117.7	5.57
2.0326	0.00927679	0.616364	A0A3B6MST3	Annexin		34	10	339	38.2	8.63
1.60524	0.0248177	0.616307	A0A3B6H4N8	Uncharacterized protein		3	2	834	93.4	6.89
2.35925	0.00437266	0.616274	A0A3B6RER4	Uncharacterized protein		34	5	163	19	10.48
1.50427	0.0313135	0.616162	A0A3B6AUL9	C2 domain-containing protein		25	6	441	46.1	4.46
2.50932	0.00309515	0.615446	Q93YY0	68 kDa protein HP68		34	15	604	68.1	7.83			catalytic activity;nucleotide binding
2.15767	0.00695558	0.615284	A0A3B6JLH1	Uncharacterized protein		20	9	713	79.9	5.88
2.18976	0.00646009	0.614909	A0A3B6KHS5	OCRE domain-containing protein		9	2	427	46.9	4.55
2.28901	0.00514037	0.614596	A0A3B5ZRI1	PPR_long domain-containing protein		45	14	452	50.6	7.06
2.44912	0.00355535	0.61447	A0A3B6KFM7	Pyruvate carboxyltransferase domain-containing protein		51	20	627	67.3	6.73
2.07286	0.00845546	0.612765	A0A3B6MW80	PCI domain-containing protein		51	18	496	55.4	8.27
1.81053	0.0154693	0.612227	A0A3B6EP07	Uncharacterized protein		18	6	390	42.7	9.22
1.33132	0.0466313	0.611987	A0A3B6IVK1	Uncharacterized protein		51	19	530	58.4	6.16
3.17012	0.0006759	0.611735	A0A3B6APL0	Peptidyl-prolyl cis-trans isomerase (EC 5.2.1.8)		26	2	121	13	8.54
3.08214	0.000827683	0.611613	A0A3B6EG32	Ubiquitin carboxyl-terminal hydrolase (EC 3.4.19.12)		39	13	471	52.9	6.16
3.79066	0.000161937	0.610335	A0A3B6I2X9	Uncharacterized protein		68	32	576	61.1	5.64
2.25312	0.00558319	0.608175	A0A080YU72	Uncharacterized protein	TRAES_3BF279600020CFD_c1	10	2	372	40	5.71	metabolic process	cytoplasm;nucleus	catalytic activity;metal ion binding;RNA binding
2.04362	0.0090443	0.607858	W5H014	GLTP domain-containing protein		67	13	202	22.6	6.68	transport	cytoplasm;cytosol;membrane	transporter activity
2.05867	0.0087364	0.607465	A0A3B5Y383	Uncharacterized protein		74	9	216	24.5	6.35
1.5201	0.0301927	0.607118	W5E2T2	Matrin-type domain-containing protein		19	4	320	35.6	9.67		nucleus	metal ion binding
2.73331	0.00184795	0.607048	A0A3B6B937	Peroxidase (EC 1.11.1.7)		32	8	337	36.4	7.65
1.87052	0.0134736	0.606052	A0A3B6SHK0	Uncharacterized protein		41	10	396	42.9	5.76
1.74575	0.0179578	0.60584	A0A096UNC5	Uncharacterized protein	CAMPLR22A2D_LOCUS872	18	5	376	41.2	7.55
1.63416	0.0232187	0.605361	A0A3B6RQT4	Uncharacterized protein		70	12	235	25.3	5.44
1.51025	0.0308854	0.60087	A0A3B5ZRU2	Inosine triphosphate pyrophosphatase (ITPase) (Inosine triphosphatase) (EC 3.6.1.9) (Non-canonical purine NTP pyrophosphatase) (Non-standard purine NTP pyrophosphatase) (Nucleoside-triphosphate diphosphatase) (Nucleoside-triphosphate pyrophosphatase) (NTPase)		19	3	205	22.1	5.66
1.77821	0.0166643	0.600432	A0A3B6TR89	Defective in cullin neddylation protein		26	4	225	26.3	5.31
2.27817	0.00527019	0.599727	A0A3B6THK4	Uncharacterized protein		24	17	1144	125.1	6.19
2.45301	0.0035236	0.599338	A0A341XN98	Uncharacterized protein		50	17	559	63.1	6.7
1.5761	0.0265399	0.596402	A0A3B6KD27	Uncharacterized protein		34	11	622	67.6	6.1
1.87956	0.0131958	0.59586	A0A3B5Z4S9	Fe2OG dioxygenase domain-containing protein		9	2	325	35.2	6.02
2.78911	0.00162513	0.595267	A0A077S1Q4	Uncharacterized protein	TRAES_3BF108200040CFD_c1	36	7	368	40.1	6.89			protein binding
2.31877	0.00479993	0.595179	W5F8V5	Eukaryotic translation initiation factor 3 subunit E (eIF3e) (Eukaryotic translation initiation factor 3 subunit 6)		75	21	441	50.7	5.69	cell organization and biogenesis;metabolic process;regulation of biological process;response to stimulus	cytoplasm;cytosol;membrane;nucleus;proteasome	protein binding;RNA binding;translation regulator activity
1.85119	0.0140868	0.594668	A0A3B6C534	40S ribosomal protein SA		45	12	304	32.9	4.96
1.88278	0.0130984	0.59447	A0A3B6KGR7	Uncharacterized protein		26	6	391	41.4	4.42
1.53877	0.0289221	0.594414	A0A3B6TC80	Phosphoacetylglucosamine mutase (PAGM) (EC 5.4.2.3) (Acetylglucosamine phosphomutase) (N-acetylglucosamine-phosphate mutase)		18	6	554	59.4	5.68
1.61863	0.0240639	0.593963	A0A077S148	OBG-type G domain-containing protein	TRAES_3BF042100040CFD_c1	39	11	399	44.5	8.56			nucleotide binding
5.4653	3.42532e-06	0.592568	A0A1D6A2H3	DNA replication licensing factor MCM7 (EC 3.6.4.12)	MCM7	35	20	724	80.9	6.06	metabolic process	cytoplasm;nucleus	catalytic activity;DNA binding;nucleotide binding
1.46964	0.0339128	0.592352	A0A3B6EFX0	Ribosomal_TL5_C domain-containing protein		25	4	267	29.8	9.48
1.53675	0.029057	0.590552	A0A3B6N0B4	CMP/dCMP-type deaminase domain-containing protein		38	4	213	23.2	6.62
1.81658	0.0152551	0.590357	A0A3B6R7M7	Uncharacterized protein		14	2	229	24.5	5.1
2.32505	0.00473099	0.58881	A0A077RWF2	Protein kinase domain-containing protein	TRAES_3BF274300020CFD_c1	12	7	957	103.9	6.46	metabolic process	membrane	catalytic activity;nucleotide binding;protein binding
2.84331	0.00143445	0.587553	A0A3B6PMB0	Thioredoxin domain-containing protein		32	7	418	46.3	4.96
1.99596	0.0100935	0.586665	A0A3B6SH88	DUF953 domain-containing protein		55	5	130	14.4	4.98
1.46872	0.0339842	-0.590191	A0A3B6BYW7	Glutaredoxin domain-containing protein		32	7	322	35.8	7.9
2.3988	0.00399208	-0.591591	A0A3B5ZMD5	Oxidored_FMN domain-containing protein		66	20	362	40.3	6.34
2.70538	0.00197069	-0.592408	A0A3B5Y6J0	Uncharacterized protein		21	4	293	32.1	7.12
1.51245	0.0307293	-0.594364	A0A3B6H1C8	C2 domain-containing protein		15	3	369	37	8.07
1.84526	0.0142802	-0.595121	A0A3B6SST9	DUF2012 domain-containing protein		27	4	206	22.5	8.46
2.02295	0.00948538	-0.595639	A0A3B6PQ12	Aconitase_C domain-containing protein		43	6	247	25.4	7.87
1.39979	0.0398297	-0.598009	A0A3B5YW26	Uncharacterized protein		25	4	463	51.4	5.44
2.10844	0.00779046	-0.598483	A0A3B6RI80	Uncharacterized protein		10	7	1232	133	4.58
1.65414	0.022175	-0.598654	A0A3B6JL75	Transmembrane 9 superfamily member		19	9	593	67.5	7.25
2.26982	0.0053725	-0.599742	A0A3B6HR92	Lactamase_B domain-containing protein		42	7	258	28.6	5.64
1.70854	0.0195643	-0.603023	A0A3B6RM24	Uncharacterized protein		65	22	413	46.8	6.57
2.38317	0.00413841	-0.603328	A0A3B5Y3I8	Sulfotransferase (EC 2.8.2.-)		70	16	350	40.2	6.52
1.40666	0.0392052	-0.605802	A0A3B5Z1E6	Peroxidase (EC 1.11.1.7)		33	8	304	33.1	6.92
1.60181	0.0250145	-0.60599	W5G0I2	Uncharacterized protein		15	3	228	25.5	8.44		Golgi;membrane;mitochondrion
2.61655	0.00241796	-0.606877	W5D157	WPP domain-containing protein	TRAES_3BF078000050CFD_c1	59	23	554	59.9	4.65			protein binding
1.57889	0.0263702	-0.607843	A0A3B6FLC3	Aminotran_5 domain-containing protein		27	8	471	51.1	7.02
2.07068	0.00849807	-0.608205	A0A3B6QFP1	CN hydrolase domain-containing protein		16	3	341	36.2	5.66
3.09891	0.000796321	-0.60962	A0A3B6JPA5	Fe2OG dioxygenase domain-containing protein		13	4	349	39.3	5.74
2.73653	0.00183429	-0.611258	A0A341Y4U2	Uncharacterized protein		76	34	615	67.7	5.33
3.35343	0.00044317	-0.611814	A0A3B6JK71	Beta-galactosidase (EC 3.2.1.23)		24	11	867	93.8	6.39
1.79266	0.0161191	-0.614834	A0A3B6KAS9	CN hydrolase domain-containing protein		19	4	300	33.3	6.37
2.01133	0.0097426	-0.619491	A0A3B6KP33	X8 domain-containing protein		13	4	490	52.9	5.35
3.12859	0.000743717	-0.620571	A0A1D5SLF7	Uncharacterized protein		25	2	127	14	8.15		membrane	RNA binding
1.57459	0.0266323	-0.620833	A0A3B6TS80	NAD(P)-bd_dom domain-containing protein		12	4	405	44.6	8.59
1.61326	0.0243633	-0.620908	A0A3B6HQY0	Uncharacterized protein		8	7	1039	116.3	5.16
1.72464	0.018852	-0.621898	A0A3B6GV55	Protein transport protein SEC23		9	7	846	91.8	7.23
1.30796	0.0492085	-0.622551	A0A3B6EEK3	Uncharacterized protein		25	3	256	29.1	6.33
4.14914	7.09355e-05	-0.62374	A0A3B6IS72	Arf-GAP domain-containing protein		24	7	464	49.9	6.81
1.71106	0.0194511	-0.624644	A0A3B6TR45	MlaD domain-containing protein		16	4	406	44.2	9.03
1.92898	0.0117767	-0.6253	A0A7H4LQ02			50	11	337	38.1	8.1
1.6896	0.0204361	-0.626088	A0A3B6TJC1	SPX domain-containing protein		23	11	716	79.2	7.71
1.80041	0.0158338	-0.626555	A0A3B6JRZ2	Uncharacterized protein		27	9	463	49.5	6.65
1.95312	0.0111398	-0.628972	I3NM23	Lipoxygenase (EC 1.13.11.-)	Lpx 4K11.1	64	35	861	95.9	6.28	metabolic process		catalytic activity;metal ion binding;protein binding
1.76295	0.0172606	-0.630389	A0A3B6PTB2	Type II inorganic proton-pumping pyrophosphatase 5-B (EC 3.6.1.1)	VP5-B	17	11	799	84.8	5.86
2.2009	0.00629644	-0.631574	A0A3B6H5Z0	FMN_red domain-containing protein		62	7	196	21.4	6.77
3.07553	0.000840377	-0.633694	A0A3B6RDH6	Transmembrane 9 superfamily member		10	4	661	74.4	6.28
2.05636	0.00878289	-0.634179	Q84LA1	Fructan 1-exohydrolase w2 (EC 3.2.1.153)	1-FEHw2	27	13	596	66.6	5.08	metabolic process		catalytic activity
2.28886	0.00514207	-0.636582	A0A3B5ZNM2	Methionine S-methyltransferase (EC 2.1.1.12)		26	19	1109	122.4	5.53
1.94628	0.0113166	-0.639183	A0A3B6PQY9	Uncharacterized protein		36	16	829	85.4	7.97
2.52846	0.00296166	-0.641175	A0A3B6B1R9	Uncharacterized protein		11	6	744	81.1	5.3
1.9039	0.0124767	-0.641929	A0A3B6I194	Uncharacterized protein		11	3	455	50.3	5.48
1.67327	0.0212193	-0.642037	A0A3B6SEK9	GSDH domain-containing protein		16	9	727	76.6	5.54
3.19084	0.000644402	-0.642537	A0A3B6H2Q3	LigB domain-containing protein		36	6	309	33.9	6.93
1.69662	0.0201087	-0.643222	A0A3B6NQB0	MFS domain-containing protein		6	4	744	79.9	5.54
2.61794	0.00241024	-0.644774	A0A3B6DJ26	Uncharacterized protein		32	9	469	50.1	6.67
2.64645	0.00225708	-0.645869	A0A3B6RP55	Peroxidase (EC 1.11.1.7)		50	12	347	36.8	4.81
1.56152	0.0274461	-0.647026	A0A3B6DAM6	NAD(P)-bd_dom domain-containing protein		47	14	442	48.5	9
4.16228	6.88216e-05	-0.648163	A0A3B6PR35	Aspartate aminotransferase (EC 2.6.1.1)		36	14	455	49.8	7.47
2.48046	0.0033078	-0.648669	A0A3B6GYC2	Sep15_SelM domain-containing protein		22	2	162	18.2	4.98
2.24744	0.0056567	-0.648736	A0A3B6JK97	Aminotran_1_2 domain-containing protein		14	4	485	52.2	6.64
4.45745	3.48777e-05	-0.649205	A0A3B6SJG2	Uncharacterized protein		7	5	1247	138.1	6.43
1.75581	0.0175466	-0.649337	A0A3B5YWC5	Uncharacterized protein		40	3	154	16.6	5.25
2.78848	0.00162749	-0.650949	A0A3B6GTQ6	Uncharacterized protein		22	8	580	63.1	5.81
1.60477	0.0248444	-0.652453	A0A3B6KC40	SAM_MPBQ_MSBQ_MT domain-containing protein		22	5	353	38.9	9.45
1.96555	0.0108255	-0.652996	A0A3B6NYC2	RPA_C domain-containing protein		30	5	277	29.7	6.54
3.24538	0.000568353	-0.653764	A0A3B6MWD3	Uncharacterized protein		32	4	213	23.8	6.05
2.06924	0.00852633	-0.654183	A0A3B6QLG7	Uncharacterized protein		28	11	788	81.7	6.65
2.09531	0.00802955	-0.655299	A0A3B6NJX5	Uncharacterized protein		25	12	610	65.5	5.53
2.74146	0.00181361	-0.659347	A0A3B5YVI6	TPT domain-containing protein		9	2	359	39.1	8.65
1.93913	0.0115045	-0.660151	A0A3B6EQC4	Uncharacterized protein		6	3	768	83.6	5.07
1.65458	0.0221524	-0.661164	A0A3B6JG58	ELYS domain-containing protein		5	3	945	105.9	6.79
2.44835	0.0035616	-0.661482	A0A3B6TDJ0	Uncharacterized protein		22	5	245	27.1	5.11
3.19073	0.000644576	-0.661893	A0A3B6C4X7	Phospho-2-dehydro-3-deoxyheptonate aldolase (EC 2.5.1.54)		47	15	537	58.7	8.24
2.04268	0.00906396	-0.66477	A0A3B6AY63	Dirigent protein		20	2	225	22.9	5.43
1.35205	0.044458	-0.665617	A0A3B6RDD8	Uncharacterized protein		19	4	246	28.1	9.14
2.4013	0.00396921	-0.668601	A0A3B6C3X9	V-type proton ATPase subunit H		49	15	452	51.4	7.87
2.23719	0.00579177	-0.672175	A0A3B6NQK7	CAAX prenyl protease (EC 3.4.24.84)		11	3	425	48.6	7.61
2.16116	0.00689982	-0.672591	A0A3B5ZPS2	Beta-hexosaminidase (EC 3.2.1.52)		30	10	542	60	5.97
2.89069	0.00128621	-0.672816	A0A3B6LLS2	Protein kinase domain-containing protein		20	4	337	37.9	6.58
1.63276	0.0232939	-0.672918	A0A3B6IJT8	Lipoxygenase (EC 1.13.11.-)		56	35	878	99.5	6.61
1.65348	0.0222083	-0.674661	A0A3B6FFG0	Dilute domain-containing protein		12	6	764	86.1	8.7
1.59114	0.0256368	-0.675263	A0A3B6KUA5	PKS_ER domain-containing protein		19	5	378	40	8.43
2.58187	0.002619	-0.675727	A0A3B6AYA6	Aldo_ket_red domain-containing protein		37	11	347	37.8	6.14
1.98695	0.010305	-0.676798	A0A3B6MK61	Uncharacterized protein		29	13	667	75.3	6.92
2.44345	0.00360202	-0.678591	A0A3B6RPV3	Uncharacterized protein		30	6	389	40.4	5.25
1.71532	0.019261	-0.679021	Q8RW01	Glutathione transferase (EC 2.5.1.18)	gstu2	29	5	233	25.2	5.34			catalytic activity;protein binding
2.82429	0.00149867	-0.679912	A0A3B6SSP5	Peroxidase (EC 1.11.1.7)		30	5	316	34	7.36
1.3981	0.0399855	-0.680111	A0A3B6RFK1	Superoxide dismutase [Cu-Zn] (EC 1.15.1.1)		14	2	201	20.3	5.45
1.34593	0.0450889	-0.680535	A0A3B6H4E7	Uncharacterized protein		58	13	356	38.7	6.24
2.05351	0.0088408	-0.681609	A0A3B5ZZ53	Sulfotransferase (EC 2.8.2.-)		46	13	350	40.2	6.52
1.76314	0.0172526	-0.684452	A0A1D6CJF1	Uncharacterized protein		26	6	339	38.6	4.84	cell death;development;metabolic process;regulation of biological process
1.95064	0.0112037	-0.690014	Q43663	Wali3 protein	wali3	24	2	88	9.5	8.35	regulation of biological process	extracellular	enzyme regulator activity
2.73947	0.00182193	-0.690756	A0A3B6UAW0	Clathrin light chain		34	8	310	33	6.73
1.60154	0.0250301	-0.691145	A0A3B5ZPZ3	Uncharacterized protein		35	7	373	39.8	6.13
1.99895	0.0100242	-0.692677	A0A3B6EL42	Glycosyltransferase (EC 2.4.1.-)		27	8	466	50.6	5.99
1.67062	0.0213493	-0.693418	A0A3B5ZPN5	Uncharacterized protein		9	7	1248	133.5	7.59
3.32746	0.000470481	-0.693707	A0A3B6TSV1	Uncharacterized protein		42	5	227	23.2	5.76
3.86795	0.000135534	-0.697607	A0A1D5ZWJ3	TLC domain-containing protein		10	3	315	36.8	7.91		endoplasmic reticulum;membrane
2.70594	0.00196814	-0.699869	A0A077S025	Protein ROOT HAIR DEFECTIVE 3 homolog (EC 3.6.5.-) (Protein SEY1 homolog)	TRAES_3BF047600010CFD_c1	36	18	805	90.2	5.54		endoplasmic reticulum;membrane	catalytic activity;nucleotide binding
1.33787	0.0459337	-0.703734	A0A3B6R6T1	Acyl-coenzyme A oxidase		46	23	668	73.9	7.03
1.30303	0.0497698	-0.704455	A0A3B6PLR8	S-adenosylmethionine synthase (EC 2.5.1.6)		81	19	394	42.8	5.92
3.10945	0.000777236	-0.706375	A0A3B6EME0	TPT domain-containing protein		8	2	357	39.3	8.79
2.21687	0.00606912	-0.707716	A0A1D5UTZ2	Flavodoxin-like domain-containing protein	CAMPLR22A2D_LOCUS2615	48	7	204	21.5	6.42	metabolic process		catalytic activity;nucleotide binding
2.97929	0.00104885	-0.708316	A0A3B6AU00	GOLD domain-containing protein		26	6	228	25.8	7.93
1.48266	0.0329109	-0.708535	A0A3B6GSY1	Glycosyltransferase (EC 2.4.1.-)		15	5	510	56.3	5.27
2.27369	0.00532483	-0.70997	A0A3B6TH23	Uncharacterized protein		29	6	339	33.1	8.06
2.82062	0.00151141	-0.712013	A0A3B5YYD9	Serine/threonine-protein kinase TOR (EC 2.7.11.1)		3	4	2475	277.8	7.08
1.4944	0.0320333	-0.713286	A0A3B6JEF0	Lipoyl-binding domain-containing protein		35	11	438	47.8	8.54
2.39609	0.00401703	-0.71718	A0A3B6FF31	UBIQUITIN_CONJUGAT_2 domain-containing protein		14	10	1089	119.7	4.72
1.67574	0.0210991	-0.72036	Q2L9B8	Vacuolar ATP synthase subunit E	VATE TRAES_3BF081200010CFD_c1	65	13	227	26.1	6.87	transport		catalytic activity;transporter activity
1.64926	0.0224255	-0.72137	A0A3B6H3C3	Uncharacterized protein		6	2	344	37.9	7.01
3.01411	0.000968033	-0.723158	A0A3B6QH30	Usp domain-containing protein		32	5	177	20	6.52
2.24792	0.00565045	-0.723959	A0A3B5Z338	Folate gamma-glutamyl hydrolase (EC 3.4.19.9)		37	6	337	37	7.49
2.13558	0.00731846	-0.7244	A0A3B6RKN3	Uncharacterized protein		5	2	462	49.9	5.49
2.15511	0.00699657	-0.72564	A0A3B6H1A2	Uncharacterized protein		10	4	551	59	7.62
1.35786	0.0438675	-0.725717	A0A3B6GRF4	Uncharacterized protein		61	9	331	35.6	5.83
1.34733	0.0449443	-0.727296	A0A3B6HW57	Beta-adaptin-like protein		33	21	898	99.1	5.11
1.7906	0.0161957	-0.727499	A0A3B6NP01	Sucrose-phosphate synthase 9		11	7	959	107.6	7.25
2.58749	0.00258529	-0.728084	A0A3B6INW9	Protein kinase domain-containing protein		5	3	955	101.7	6.62
2.00057	0.00998686	-0.729577	A0A3B6KBI9	Uncharacterized protein		18	13	1257	140.4	6.01
1.76908	0.0170183	-0.730517	A0A3B6AXX7	PKS_ER domain-containing protein		31	8	335	34.8	8.9
1.33988	0.0457211	-0.730751	A0A3B6TSS1	Flavin-containing monooxygenase (EC 1.-.-.-)		11	3	528	59.4	6.65
1.82324	0.0150231	-0.731301	A0A3B6JMD9	Uncharacterized protein		13	2	207	22.8	6.35
1.44747	0.0356888	-0.735008	A0A3B6KTS3	Peroxidase (EC 1.11.1.7)		11	3	331	33.9	6.33
1.90189	0.0125346	-0.738582	A0A341ZHG0	Uncharacterized protein		42	9	217	23.9	5.74
2.5722	0.00267796	-0.74187	A0A3B6IS09	Uncharacterized protein		26	6	310	34	6.18
1.34946	0.0447235	-0.743063	A0A3B6TJ25	Uncharacterized protein		24	7	422	46.3	5.95
1.87041	0.0134768	-0.743327	A0A3B6MKK3	Uncharacterized protein		18	3	170	18.4	10.35
1.80143	0.0157968	-0.744955	A0A3B6DCM1	Uncharacterized protein		21	5	473	50.2	5.25
2.20346	0.00625953	-0.74554	A0A3B5Z492	SAC domain-containing protein		28	12	664	75.2	8.94
2.65967	0.00218945	-0.745828	A0A3B6SFL3	Abhydrolase_3 domain-containing protein		41	7	323	34.4	5.8
1.59298	0.0255282	-0.745891	W5CY81	Fe2OG dioxygenase domain-containing protein	TRAES_3BF168600030CFD_c1	15	4	349	39.2	5.71	metabolic process		catalytic activity;metal ion binding
2.65491	0.00221355	-0.746875	A0A3B6KT48	Uncharacterized protein		53	9	223	25.4	6.73
1.43633	0.0366161	-0.749829	A0A3B6NS75	AAA domain-containing protein		9	5	950	106	5.68
1.40699	0.0391754	-0.749953	A0A3B6CJE1	Peroxidase (EC 1.11.1.7)		23	5	342	36.3	6.79
2.77688	0.00167154	-0.75023	A0A3B6TN56	Uncharacterized protein		8	2	482	51	5.57
3.40273	0.000395613	-0.751529	A0A3B6HXW0	Uncharacterized protein		28	12	684	75.3	7.17
1.51955	0.0302312	-0.753259	A0A3B6HYS0	Uncharacterized protein		64	18	333	36.9	5.31
2.90363	0.00124844	-0.753934	A0A3B6PPP1	Transmembrane 9 superfamily member		10	4	657	74.3	6.79
1.45168	0.0353444	-0.755873	A0A3B6SDT6	Uncharacterized protein		16	3	380	41.7	8
1.72437	0.0188639	-0.757272	A0A3B6PK37	Uncharacterized protein		6	2	549	61.2	6.43
1.62722	0.023593	-0.757354	D3KVP3	Purple acid phosphatase (EC 3.1.3.2)		14	3	335	37.9	5.86	metabolic process		catalytic activity
1.99842	0.0100364	-0.759102	A0A3B6EI07	Cytidine deaminase		37	7	310	31.6	5.16
3.15287	0.000703278	-0.760469	A0A3B6TKL9	ATP-dependent 6-phosphofructokinase (ATP-PFK) (Phosphofructokinase) (EC 2.7.1.11) (Phosphohexokinase)	PFK	22	7	554	59.9	6.76
2.16077	0.00690603	-0.761867	A0A3B6B3K1	Cyclic nucleotide-binding domain-containing protein		28	7	425	48.1	7.62
1.47873	0.0332102	-0.761911	A0A3B6EN15	RRM domain-containing protein		59	6	173	16.9	8.16
1.39277	0.0404792	-0.764551	A0A3B6MX10	Endoglucanase (EC 3.2.1.4)		9	3	531	57.3	6.32
2.41171	0.00387514	-0.766624	A6Q0N9	Putative acyl transferase 4	acT4	67	20	419	46.4	6.05			catalytic activity
2.42738	0.0037378	-0.768766	A0A3B6FJI0	Alba domain-containing protein		23	2	153	16.2	4.92
1.61742	0.0241311	-0.768963	A0A077RXR8	AAI domain-containing protein	TRAES_3BF077200050CFD_c1	34	4	110	11.1	9.36
2.35877	0.00437754	-0.770825	A0A3B5ZSA8	Lipase_GDSL domain-containing protein		7	2	431	45.7	8.32
1.78385	0.0164493	-0.772071	W4ZPL7	PRA1 family protein		12	2	209	24.2	10.43	transport	membrane
2.98255	0.001041	-0.772117	A0A3B6ELX1	RRM domain-containing protein		8	2	266	28.6	8.9
2.06478	0.00861425	-0.77219	A0A3B5ZUV5	Uncharacterized protein		26	8	475	52.3	6.33
1.38037	0.041651	-0.774409	A0A3B6KRN6	AAA domain-containing protein		9	3	513	56.2	7.05
2.7638	0.00172268	-0.777125	A0A3B6C489	Thioredoxin domain-containing protein		20	7	485	54.4	7.36
2.03481	0.00922982	-0.778465	A0A3B6C3M3	LRRNT_2 domain-containing protein		7	2	334	36.3	7.25
1.70766	0.0196039	-0.781665	A0A3B6D8S1	Pectin acetylesterase (EC 3.1.1.-)		26	7	413	45.1	8.38
1.32208	0.0476339	-0.781685	A0A3B6SLG2	Peroxidase (EC 1.11.1.7)		22	6	331	35.6	7.17
2.98181	0.00104277	-0.785028	A0A3B6NK32	Uncharacterized protein		12	5	569	60.5	7.24
1.38388	0.0413161	-0.788724	A0A3B6IRJ0	WD_REPEATS_REGION domain-containing protein		17	3	322	33.6	6.15
1.79697	0.0159599	-0.789784	A0A3B6THB2	Uncharacterized protein		9	3	518	58.2	8.7
3.35642	0.000440128	-0.790757	A0A3B6KL69	NTF2 domain-containing protein		49	4	122	13.4	6.62
1.49791	0.0317755	-0.79284	A0A3B5ZNW4	Patatin (EC 3.1.1.-)		51	12	411	45	6.54
2.0594	0.00872168	-0.794779	A0A3B6FX34	PX domain-containing protein		39	13	400	45.9	6.25
1.79439	0.016055	-0.794833	A0A3B5YRV2	Kinesin motor domain-containing protein		9	6	1060	117.6	5.74
1.78234	0.0165065	-0.795173	A0A3B6MY02	Lipoxygenase (EC 1.13.11.-)		59	35	864	96.5	6.65
1.57094	0.0268572	-0.796669	A0A3B6FRG3	Neutral ceramidase (EC 3.5.1.23)		11	6	826	90.7	6.64
2.4666	0.00341509	-0.797462	A0A3B6GV80	Uncharacterized protein		16	6	517	58.3	7.06
1.6999	0.0199574	-0.798629	A0A3B6KQ04	Uncharacterized protein		14	9	834	94.7	7.2
2.54139	0.00287483	-0.798975	A0A3B6QBY7	Uncharacterized protein		23	3	238	26.6	5.71
1.94262	0.0114124	-0.799581	A0A3B6DNN9	Epimerase domain-containing protein		11	3	338	36.5	5.88
1.92506	0.0118833	-0.799904	A0A3B6KD17	Uncharacterized protein		15	4	445	49.9	7.31
1.38113	0.0415784	-0.800446	A0A0A7AC96	Pathogenesis-related protein 1-21	Pr-1-21	43	5	174	18.8	8.91		extracellular
1.73378	0.0184594	-0.801408	A0A3B6RI31	Uncharacterized protein		12	3	447	48.7	7.3
1.86497	0.0136467	-0.801454	A0A3B5ZYA9	Uncharacterized protein		19	5	454	47.7	6.13
1.79141	0.0161655	-0.802498	A9RAB1	Mitogen-activated protein kinase (EC 2.7.11.24)	MAPK2B	8	3	549	62.3	8.57	metabolic process;regulation of biological process;response to stimulus	membrane;vacuole	catalytic activity;nucleotide binding;signal transducer activity
1.77693	0.0167137	-0.80303	A0A3B6TFN4	Abhydrolase_3 domain-containing protein		35	6	324	34.4	5.52
4.59336	2.55056e-05	-0.804462	A0A3B6C8K9	Cellulase domain-containing protein		6	2	582	63.9	5.86
1.30935	0.0490516	-0.805292	A1YE34	Ribosomal protein L3-B2 (Ribosomal protein L3B-2)	RPL3-B2 RPL3B-2	42	17	389	44.6	10.07	metabolic process	ribosome	structural molecule activity
2.01002	0.00977189	-0.80593	A0A3B6U6K4	Uncharacterized protein		16	13	971	108.3	7.09
1.45564	0.0350232	-0.806481	A0A3B6EP97	Uncharacterized protein		49	19	578	62.7	4.75
2.47094	0.00338115	-0.807093	A0A3B6IKR6	Dirigent protein		32	6	330	35.2	8.84
2.48718	0.00325705	-0.808761	A0A3B6B6H9	Carboxypeptidase (EC 3.4.16.-)		28	9	519	57.3	6.14
1.726	0.0187933	-0.809265	A0A3B6MZB9	Uncharacterized protein		27	12	638	68.1	6.19
1.80557	0.0156469	-0.812926	A0A3B6JG13	Aldehyde dehydrogenase		54	18	481	52.1	7.99
3.60018	0.000251087	-0.813522	A0A3B6JKY4	Uncharacterized protein		41	7	239	26.5	7.65
1.79083	0.0161871	-0.814337	A0A3B6TMF0	Uncharacterized protein		19	6	444	46.1	5.08
3.42857	0.000372757	-0.817103	A0A3B6HS75	SCD domain-containing protein		13	8	1123	128	5.8
1.8254	0.0149487	-0.818082	A0A3B6PH58	Uncharacterized protein		5	6	2139	239.5	8.75
2.36313	0.0043338	-0.819422	A0A3B6NIY4	Uncharacterized protein		21	9	524	58.6	7.15
1.78733	0.0163181	-0.821588	A0A3B6AT12	Abhydrolase_3 domain-containing protein		15	2	349	37.4	6.29
1.95865	0.0109989	-0.822499	A0A3B6AST9	Nop domain-containing protein		45	15	560	61.7	8.72
2.84447	0.00143064	-0.831185	A0A3B6RPJ7	FAD-binding PCMH-type domain-containing protein		44	18	561	64.7	7.97
2.98652	0.00103152	-0.831488	A0A3B5Y318	Uncharacterized protein		48	14	477	51.1	8.07
2.04627	0.00898929	-0.836133	A0A3B6PUV8	Uncharacterized protein		51	13	367	39.8	5.57
3.28449	0.000519409	-0.836548	A0A077RQ44	Uncharacterized protein	TRAES_3BF057900060CFD_c1	4	2	991	107.1	9.58			metal ion binding;protein binding;RNA binding
2.72603	0.00187919	-0.83884	A0A3B6PR20	Uncharacterized protein		18	6	400	45.8	8.53
3.15862	0.000694031	-0.842682	A0A3B6NRW0	ATP-dependent Clp protease proteolytic subunit (EC 3.4.21.92)		35	5	300	32.2	6.7
1.67863	0.0209589	-0.843925	A0A1D5V0A4	Uncharacterized protein	CAMPLR22A2D_LOCUS829	8	3	509	57.4	6.14	metabolic process		catalytic activity
2.27364	0.00532544	-0.844106	A0A3B6MPD0	Peroxidase (EC 1.11.1.7)		17	4	354	36.9	7.75
1.46102	0.0345926	-0.844327	W5I6L2	HVA22-like protein		11	2	194	22.6	8.63		membrane
3.79525	0.000160232	-0.845526	A0A3B5ZZF7	Aldedh domain-containing protein		37	15	495	53.6	5.78
1.8603	0.0137944	-0.846443	A0A3B6G1F9	Eukaryotic translation initiation factor 3 subunit M (eIF3m)		36	10	416	45.7	5.53
2.07521	0.00840993	-0.848757	A0A3B6REU6	Uridine kinase (EC 2.7.1.48)		8	3	489	54.5	6.62
2.30219	0.00498667	-0.849624	A0A3B5Z5D0	Uncharacterized protein		16	7	710	77.6	6.98
1.8759	0.0133075	-0.85259	A0A3B5YV69	DUF1338 domain-containing protein		19	4	361	40.2	6.81
3.21165	0.00061425	-0.852806	A0A3B6DMR3	Fn3_like domain-containing protein		27	13	776	82.2	6.3
2.48932	0.00324099	-0.853374	A0A3B5YRI3	Cation_ATPase_N domain-containing protein		31	23	1057	114.3	5.62
1.7948	0.0160399	-0.854489	A0A7H4LII6			28	5	338	37.2	7.4
2.8123	0.00154063	-0.854651	A0A3B6KMM6	PLCXc domain-containing protein		7	2	338	37.8	7.65
1.36246	0.0434055	-0.857397	Q06I79	Fasciclin-like protein FLA27		17	4	482	51	6.6
2.22936	0.00589718	-0.857582	A0A3B5Z4I9	3-ketoacyl-CoA synthase (EC 2.3.1.-)		11	4	525	58	8.82
1.66732	0.0215121	-0.85904	A0A3B6PHV8	Chloride channel protein		7	3	784	85.5	8
1.86385	0.0136819	-0.859127	A0A3B6QHL7	DHO_dh domain-containing protein		61	16	417	45.4	6.35
1.98385	0.0103788	-0.862866	A0A3B6H230	Uncharacterized protein		7	3	512	56.3	5.05
2.90391	0.00124766	-0.871153	A0A3B5XVJ2	Uncharacterized protein		23	7	498	54	6.04
1.69136	0.0203537	-0.871198	A0A3B6CD11	Uncharacterized protein		34	36	1629	182.7	7.02
1.77706	0.0167086	-0.871229	A0A3B5Z432	Nop domain-containing protein		42	14	560	61.8	8.81
1.58922	0.0257501	-0.878605	A0A3B6B8A4	CULLIN_2 domain-containing protein		5	3	732	85	8.25
2.3806	0.00416294	-0.878671	A0A3B6EGN3	Peroxidase (EC 1.11.1.7)		43	9	338	35.3	8.44
1.65102	0.0223349	-0.879898	A0A3B6A0K1	Uncharacterized protein		15	5	504	56.8	6.3
2.91473	0.00121695	-0.880431	A0A3B6LDJ7	Uncharacterized protein		70	11	257	26.9	6.73
3.15819	0.000694723	-0.883438	A0A3B6IQ76	Uncharacterized protein		52	19	670	75	6.21
2.17919	0.0066193	-0.883968	A0A3B6MIK4	dUTPase domain-containing protein		11	2	220	22.4	9.45
1.46698	0.034121	-0.884913	A0A3B6IMG4	Uncharacterized protein		14	5	767	78.3	6.42
2.22681	0.00593182	-0.887399	A0A3B6RLS6	ThiF domain-containing protein		23	6	328	36.1	5.12
1.90212	0.012528	-0.889714	A0A3B6KNP3	GB1/RHD3-type G domain-containing protein		8	4	605	69.5	8.38
2.32047	0.00478112	-0.889872	A0A3B6TT17	Uncharacterized protein		35	8	369	40	5.76
2.60587	0.00247814	-0.890248	A0A3B6RR94	Uncharacterized protein		17	7	557	59.4	5.52
1.32089	0.0477654	-0.892071	A0A3B6TGR6	Uncharacterized protein		18	3	256	28.1	7.53
1.95104	0.0111934	-0.892626	A0A3B5YX89	Alpha-galactosidase (EC 3.2.1.22) (Melibiase)		38	10	371	41.1	6.54
2.09012	0.00812608	-0.893528	W5H2I7	Phosphatidylinositol transfer protein Sec14p	SEC14p-5	24	5	327	37.1	7.84
3.00468	0.000989282	-0.896136	Q84PN8	Fructan 1-exohydrolase w1 (EC 3.2.1.153)	1-FEHw1	29	14	597	66.6	5.16	metabolic process		catalytic activity
3.26402	0.000544473	-0.896289	A0A3B6EH40	Uncharacterized protein		31	23	1188	130.2	5.87
1.97113	0.0106875	-0.896712	A0A3B5YQM9	Uncharacterized protein		39	12	453	48.6	5.53
1.61142	0.0244671	-0.898926	A0A1D5YJK2	Signal peptidase complex subunit 3 (EC 3.4.-.-) (Microsomal signal peptidase 22 kDa subunit)		19	3	167	18.8	8.18	metabolic process		catalytic activity
2.87539	0.00133231	-0.899751	A0A3B5ZSK3	Cellulose synthase (EC 2.4.1.12)		23	15	1079	121.6	6.98
4.13367	7.35064e-05	-0.900795	A0A3B6GVP2	Uncharacterized protein		7	4	776	84.3	5.91
2.23484	0.00582323	-0.903791	A0A3B6I0Z1	Lipoxygenase (EC 1.13.11.-)		55	36	878	99.4	6.61
2.30031	0.00500832	-0.904301	A0A3B6C2W3	Ribosomal protein L19		25	4	206	24	11.44
2.15881	0.00693736	-0.906146	A0A3B6LFR9	Uncharacterized protein		21	4	263	28	5.82
1.59001	0.0257034	-0.906287	A0A3B6B1S7	Uncharacterized protein		26	5	308	33.5	5.9
1.54776	0.0283297	-0.909418	A0A3B6LSS1	Uncharacterized protein		9	3	415	44.6	7.8
3.92647	0.000118448	-0.910613	A0A3B6FUF0	Uncharacterized protein		73	7	212	23.4	6.2
2.93046	0.00117365	-0.915494	A0A3B6KJV1	Phytocyanin domain-containing protein		23	2	163	15.5	7.3
2.31433	0.0048492	-0.916191	A0A3B6BY94	Uncharacterized protein		64	16	357	38.7	5.97
1.58626	0.025926	-0.916741	A0A3B6JGE6	Uncharacterized protein		12	3	477	53.1	6.4
2.10954	0.00777073	-0.91848	A0A3B6EFE3	Uncharacterized protein		22	7	477	51.8	6.09
2.25381	0.00557431	-0.920551	A0A3B6GT33	Lipase_GDSL domain-containing protein		20	4	407	44.1	7.83
3.06013	0.000870707	-0.921077	A0A3B6CCY3	NAD(P)-bd_dom domain-containing protein		30	9	412	45	8.85
2.88512	0.0013028	-0.922409	A0A3B5YSU3	Glutamate--cysteine ligase (EC 6.3.2.2)		43	13	498	56.1	6.2
1.79109	0.0161775	-0.922749	A0A3B5YV34	Uncharacterized protein		14	5	605	67	6.71
3.52465	0.000298776	-0.922869	A0A3B6JFI9	Threonine dehydratase (EC 4.3.1.19) (Threonine deaminase)		13	5	539	59	5.81
1.3813	0.0415622	-0.922994	A0A3B5ZTF5	Midasin		3	9	5350	603.9	5.47
1.33953	0.0457586	-0.923435	A0A3B6LHR4	Usp domain-containing protein		20	2	166	17.9	7.05
2.65124	0.00223235	-0.928571	A0A3B6PUF3	AP-1 complex subunit gamma		15	9	892	96.8	7.42
2.78075	0.00165674	-0.929713	A0A3B6QCR5	Uncharacterized protein		31	5	276	28.7	6.57
3.47692	0.000333492	-0.934816	A0A3B6QHZ1	Annexin		57	16	315	35.3	6.81
2.21369	0.00611383	-0.937613	A0A1D5ZLT8	ADF-H domain-containing protein		72	8	138	16.1	5.95	cell organization and biogenesis	cytoskeleton	protein binding
2.53104	0.00294418	-0.941959	C8CK09	Phosphomannomutase (EC 5.4.2.8)	PMM-D1 CAMPLR22A2D_LOCUS5822	48	10	252	28.4	6.04	metabolic process	cytoplasm	catalytic activity
2.96193	0.00109161	-0.942127	A0A3B6EGJ2	Aldedh domain-containing protein		39	15	503	54.3	5.43
2.77058	0.00169596	-0.943082	A0A3B6GQI2	KOW domain-containing protein		41	5	157	17.5	11.12
1.58509	0.0259964	-0.94776	A0A3B6KUZ8	Uncharacterized protein		22	3	273	28.9	5.6
1.44143	0.0361886	-0.951666	A0A3B6SJ80	AAI domain-containing protein		29	3	133	13.7	7.96
1.59274	0.0255421	-0.953687	A0A3B6C407	Uncharacterized protein		13	4	462	50.3	7.27
2.14681	0.00713169	-0.956171	A0A3B6TLY2	Abhydrolase_3 domain-containing protein		63	12	315	33.6	5.8
1.70411	0.0197648	-0.958093	A0A3B5ZMY8	Uncharacterized protein		17	4	371	40.4	6.2
2.1694	0.00677012	-0.961055	A0A3B6TKT3	FAD-binding PCMH-type domain-containing protein		23	9	591	63.8	7.31
1.56246	0.0273869	-0.963264	A0A3B6DMD0	Uncharacterized protein		24	8	534	57.3	5.73
4.11646	7.6479e-05	-0.964724	A0A3B6LWW9	Uncharacterized protein		14	4	542	60.2	7.72
1.57267	0.0267503	-0.968851	P46274	Mitochondrial outer membrane porin (Voltage-dependent anion-selective channel protein) (VDAC)	VDAC1	59	12	275	28.9	8.44	transport	membrane;mitochondrion	transporter activity
1.89109	0.0128503	-0.970957	A0A3B6JIC3	Uncharacterized protein		28	5	255	28.6	5.71
1.95892	0.010992	-0.971987	A0A3B6C4N3	Uncharacterized protein		14	2	278	29.5	4.89
2.91228	0.00122383	-0.979233	A0A3B6IMC2	Uncharacterized protein		22	3	170	17.6	5.06
2.21358	0.00611529	-0.979445	A0A3B6TUP9	Serine/threonine-protein phosphatase 2A 55 kDa regulatory subunit B		13	5	523	58.6	5.9
2.49536	0.00319622	-0.979527	A0A3B6SHJ7	DNA-directed RNA polymerase subunit (EC 2.7.7.6)		3	4	1852	205.9	5.95
1.33854	0.0458626	-0.979892	A0A3B6GPE9	Fe2OG dioxygenase domain-containing protein		20	5	329	37.2	5.1
3.77403	0.000168257	-0.980253	A0A3B6QIP8	AAI domain-containing protein		20	3	184	18.8	8.31
2.32647	0.00471552	-0.98379	A0A3B5ZXZ8	NmrA domain-containing protein		39	7	310	33.1	5.53
1.9589	0.0109926	-0.985852	A0A3B5Y2X5	Glyco_hydro_18 domain-containing protein		34	6	289	31.7	5.3
3.29666	0.000505053	-0.990069	A0A3B6QL57	TPR_MLP1_2 domain-containing protein		12	17	2029	228.9	5.17
2.72061	0.0019028	-0.996602	A0A3B5ZMV6	Oxidored_FMN domain-containing protein		60	18	362	40.2	5.8
2.17138	0.00673943	-0.997831	A0A3B6FNB9	Carbonic anhydrase (EC 4.2.1.1) (Carbonate dehydratase)		20	3	254	27.5	7.2
1.97532	0.0105846	-1.00102	A0A3B6IKT5	Uncharacterized protein		23	8	595	64.9	8.19
2.07711	0.00837326	-1.00202	A0A3B6RQD1	Tr-type G domain-containing protein		60	40	843	93.8	6.16
2.28215	0.0052222	-1.00422	A0A3B6LKR1	START domain-containing protein		7	4	758	85.1	7.25
4.64782	2.24999e-05	-1.00509	A0A3B6LU57	Reticulon-like protein		12	3	259	29.3	9.07
3.08938	0.000813997	-1.00726	A0A3B6JQR7	Uncharacterized protein		34	5	226	24.9	6.35
2.42947	0.00371988	-1.00793	A0A3B6LGN4	Uncharacterized protein		30	9	500	53.8	5.78
1.39133	0.0406135	-1.01048	A0A3B6H395	RING-type domain-containing protein		10	2	370	40.4	5.3
1.76308	0.0172551	-1.01074	A0A3B6MS61	FAD-binding PCMH-type domain-containing protein		36	12	525	57.1	9.13
3.56684	0.000271121	-1.01246	A0A3B6TQT3	Abhydrolase_3 domain-containing protein		21	6	353	37.6	4.86
1.77467	0.0168009	-1.01399	A0A3B6B2W7	4HBT domain-containing protein		19	2	170	17.8	7.09
3.45791	0.000348409	-1.01649	A0A3B6NRW8	Uncharacterized protein		47	11	442	48.2	5.95
2.68263	0.00207668	-1.01932	A0A3B6TBJ3	Uncharacterized protein		13	2	249	27.1	5.08
2.58151	0.00262116	-1.0199	A0A3B6CF64	Fn3_like domain-containing protein		31	15	775	82	5.92
3.89114	0.000128488	-1.02084	A0A3B6JDS7	Uncharacterized protein		19	7	596	64.9	8.19
2.35107	0.00445588	-1.02275	Q56TP3	Xyloglucan endotransglucosylase/hydrolase (EC 2.4.1.207)		12	3	283	31	4.89	cell organization and biogenesis;metabolic process	extracellular	catalytic activity
2.09014	0.00812566	-1.03052	A0A3B6C2C6	GRAM domain-containing protein		28	5	290	30.8	7.08
3.37804	0.000418757	-1.03104	A0A3B6C5T7	Phytocyanin domain-containing protein		19	2	198	19.8	8.87
2.45551	0.00350337	-1.03233	A0A3B5ZPB4	Aminotran_1_2 domain-containing protein		9	2	424	46	5.73
1.79213	0.0161389	-1.03517	A0A3B5XZW3	Uncharacterized protein		22	2	177	19.2	5.81
2.72653	0.00187704	-1.03555	A0A3B6PSU4	Uncharacterized protein		51	12	365	39.5	5.55
2.15815	0.0069479	-1.03936	A0A3B6EAD2	Uncharacterized protein		8	2	316	33.2	5.3
2.36135	0.00435162	-1.04139	A0A3B5ZN61	Uncharacterized protein		12	3	305	31.9	6.43
2.87332	0.00133868	-1.04232	A0A3B6DKT3	V-type proton ATPase subunit a		3	2	819	92.4	6.15
2.04476	0.0090207	-1.04276	A0A3B6MRI1	Phosphoglycolate phosphatase (EC 3.1.3.18)		26	4	299	33.1	5.55
1.37765	0.0419132	-1.04325	Q66VR4	Auxin amidohydrolase		28	7	437	47.3	5.74	metabolic process		catalytic activity
1.38617	0.0410991	-1.04548	A0A3B6C7C2	PAP2_C domain-containing protein		6	2	439	49	9.31
1.45358	0.0351901	-1.04975	A0A3B6PHH6	Uncharacterized protein		17	4	411	44.8	5.67
1.42057	0.037969	-1.05607	A0A3B5ZTJ3	Uncharacterized protein		11	2	237	26.1	5.69
3.17878	0.000662549	-1.0609	A0A3B6LK51	Uncharacterized protein		49	14	476	50.4	6.06
1.84648	0.0142403	-1.06137	A0A3B5YUH9	Protein kinase domain-containing protein		8	3	617	65.2	8.66
1.35126	0.0445386	-1.06355	A0A077S2A9	Uncharacterized protein	TRAES_3BF043700170CFD_c1	48	19	578	63	4.75	transport
1.97761	0.010529	-1.06703	A0A3B5YQA2	Uncharacterized protein		23	6	371	40.5	5.45
2.30005	0.00501132	-1.06931	A0A3B6LND2	Aamy domain-containing protein		7	3	776	86.2	6.6
3.49907	0.000316903	-1.07236	A0A3B6MZK8	Uncharacterized protein		34	30	1335	141.7	6.34
2.70083	0.00199144	-1.07263	A0A3B6PHD6	Catalase (EC 1.11.1.6)		54	18	494	56.9	7.18
1.61005	0.0245443	-1.07478	A0A3B6GXK5	WD_REPEATS_REGION domain-containing protein		10	2	317	35.2	6.42
2.80412	0.00156992	-1.07716	A0A3B6LUI9	Uncharacterized protein		30	24	1317	140.8	6.01
2.87833	0.00132334	-1.0781	A0A3B6ING2	Lipoxygenase (EC 1.13.11.-)		68	38	821	91.4	6.48
1.33143	0.0466202	-1.07841	A0A3B5ZNC5	YTH domain-containing protein		20	6	475	52.6	7.05
3.24128	0.000573747	-1.07947	A0A3B5YYB6	Uncharacterized protein		49	13	315	34.8	6.96
2.82125	0.00150922	-1.08049	A0A3B6IMW1	Oxidored_FMN domain-containing protein		71	21	362	40.3	6.2
2.70634	0.00196634	-1.08166	A0A3B6LPN0	Uncharacterized protein		6	2	418	46.2	8.1
1.3387	0.0458453	-1.08493	A0A3B6ISV7	Aminotran_1_2 domain-containing protein		15	4	485	52.2	6.48
2.3449	0.00451955	-1.09028	A1YE31	Ribosomal protein L3-A3 (Ribosomal protein L3A-3)	RPL3-A3 RPL3A-3	36	14	389	44.6	9.95	metabolic process	ribosome	structural molecule activity
2.29788	0.00503642	-1.0915	A0A3B6LUG9	Cellulose synthase (EC 2.4.1.12)		8	6	1074	119.7	7.61
1.88672	0.01298	-1.09168	A0A3B6QGJ9	Protein CLP1 homolog		6	2	476	51.7	7.28
1.90897	0.012332	-1.09605	A0A3B6K9U5	Uncharacterized protein		16	3	263	28	6.29
1.82012	0.0151315	-1.09615	A0A3B6ARL6	Uncharacterized protein		5	2	551	59.6	8.66
1.80859	0.0155385	-1.10205	A0A1D5SXM7	Uncharacterized protein		31	8	383	43	6.79		membrane
2.97144	0.00106797	-1.10261	A0A3B6C9W1	Uncharacterized protein		21	6	439	46.5	5.92
2.8852	0.00130257	-1.10773	A0A3B6IYK1	MFS domain-containing protein		7	2	551	59.1	8.21
1.76324	0.0172488	-1.10798	A0A3B5Z274	Transcription elongation factor spt6		5	6	1569	175.6	5.72
2.36384	0.0043267	-1.10888	A0A3B6CEZ1	Uncharacterized protein		3	3	1661	185.3	8.48
2.21456	0.00610154	-1.11039	C3VQ50	Superoxide dismutase [Cu-Zn] (EC 1.15.1.1)	SOD1	32	3	152	15.1	6.18	metabolic process;response to stimulus	mitochondrion	antioxidant activity;catalytic activity;metal ion binding
1.97112	0.0106877	-1.11225	A0A3B6HUX6	Protein kinase domain-containing protein		4	2	637	69.3	7.9
2.1005	0.00793412	-1.11419	A0A3B6RFL2	Patatin (EC 3.1.1.-)		64	16	408	44.6	6.61
2.38987	0.00407499	-1.11495	W5CRY0	Cytokinin riboside 5'-monophosphate phosphoribohydrolase (EC 3.2.2.n1)	TRAES_3BF076000040CFD_c1	27	4	226	24	5.07	metabolic process		catalytic activity
2.15684	0.0069689	-1.11572	A0A7H4LAU3			9	2	367	40.5	7.91
4.22018	6.02315e-05	-1.11674	A0A3B6I612	Uncharacterized protein		14	8	499	55.7	7.11
1.64663	0.0225617	-1.11692	A0A3B6C5Q1	Sister chromatid cohesion protein		4	4	1799	200	6.6
3.78144	0.000165408	-1.11996	A0A1D5THS1	Uncharacterized protein	CAMPLR22A2D_LOCUS3258	32	4	119	13.8	11.49	metabolic process	ribosome	structural molecule activity
2.50488	0.00312691	-1.12005	A0A3B6TQ53	Uncharacterized protein		15	10	933	101.7	6.9
3.02169	0.000951273	-1.12486	A0A3B6A2J7	Uncharacterized protein		53	18	516	55.1	5.3
2.34258	0.00454377	-1.12752	A0A3B6FVK6	Epimerase domain-containing protein		21	4	327	35.7	5.44
2.90194	0.00125332	-1.13182	C6ES53	Peroxidase (EC 1.11.1.7)	Prx111-A	38	7	316	33	6.19	metabolic process;response to stimulus	extracellular	antioxidant activity;catalytic activity;metal ion binding
2.0776	0.0083637	-1.13412	A0A3B6U501	Fe2OG dioxygenase domain-containing protein		14	3	316	35	4.88
3.55152	0.000280851	-1.13541	A0A0C4BKI1	Uncharacterized protein		33	3	112	12.7	10.62	metabolic process	ribosome	structural molecule activity
2.55714	0.00277244	-1.13733	W5ADK3	Uncharacterized protein		30	4	216	23.9	7.96	regulation of biological process;response to stimulus		catalytic activity;nucleotide binding
2.45446	0.00351185	-1.13838	A0A3B6EH00	Uncharacterized protein		14	2	194	21.2	9.52
1.58965	0.0257244	-1.13993	A0A3B6PUK0	ABC transporter domain-containing protein		27	4	291	32.6	6.44
1.8067	0.0156064	-1.14072	A0A3B6H4X8	Protein kinase domain-containing protein		3	2	949	104.2	5.88
1.83569	0.0145985	-1.14147	A0A3B6RC36	Peptidyl-prolyl cis-trans isomerase (PPIase) (EC 5.2.1.8)		32	4	160	17.2	8.06
3.20257	0.00062724	-1.1423	A0A1D5SS06	MHD domain-containing protein		32	9	379	43.6	6.83	transport
1.63998	0.0229095	-1.14716	A0A3B6RIG6	Peroxidase (EC 1.11.1.7)		20	5	320	34.1	7.56
2.37359	0.00423064	-1.1487	A0A3B6NT20	Transmembrane 9 superfamily member		10	4	656	74.2	6.84
2.60909	0.00245985	-1.15082	A0A3B6MXY0	Uncharacterized protein		26	12	677	73.1	7.24
1.42726	0.0373888	-1.15186	A0A3B6IWN2	Adenylyl-sulfate kinase (EC 2.7.1.25)		17	3	283	30.6	9
1.63234	0.0233161	-1.15191	A0A3B6UA09	Uncharacterized protein		49	13	357	38.7	6.28
3.67249	0.000212575	-1.15222	A0A3B6ARL5	Sulfotransferase (EC 2.8.2.-)		7	2	338	38.2	6.71
1.97708	0.0105419	-1.15254	A0A3B6JNK9	GRAM domain-containing protein		9	2	259	27.9	7.97
1.42454	0.0376232	-1.15268	A0A3B6TZT2	Lipase_GDSL domain-containing protein		61	12	378	40.2	6.9
4.65244	2.22616e-05	-1.15305	A0A3B6MVZ5	Aldo_ket_red domain-containing protein		37	10	350	37.7	5.97
1.88024	0.0131752	-1.15378	A0A3B6RH96	Peroxidase (EC 1.11.1.7)		13	3	322	34.4	6.4
2.20509	0.00623607	-1.1547	A0A3B6AV80	Uncharacterized protein		25	6	337	38.8	8.1
2.78116	0.00165516	-1.15778	A0A3B6EDB6	Uncharacterized protein		13	2	301	34	6.07
3.04735	0.000896701	-1.15783	A0A3B6NPP6	PKS_ER domain-containing protein		69	14	360	38.5	5.97
1.91997	0.0120235	-1.15809	W5D698	FCP1 homology domain-containing protein	TRAES_3BF003200110CFD_c1	23	5	360	40	7.88	transport	membrane
3.39645	0.000401372	-1.16142	A0A3B6TWH8	Uncharacterized protein		33	9	370	39.6	8.27
1.46087	0.0346045	-1.1617	A0A3B6HT09	Uncharacterized protein		26	10	482	52.7	7.5
1.90917	0.0123262	-1.16279	A0A3B5XTZ9	DUF383 domain-containing protein		14	3	345	37.3	4.83
2.47881	0.00332037	-1.16645	A0A3B6PQP8	Uncharacterized protein		10	3	378	40.9	5.71
2.81151	0.00154345	-1.16653	A0A3B5ZQU4	Lipase_3 domain-containing protein		32	14	519	56.7	9.01
2.36795	0.00428598	-1.16761	A0A3B5Y7C2	Cas1_AcylT domain-containing protein		10	5	540	63	8.65
1.44926	0.0355418	-1.16978	A0A077S3Y0	Fe2OG dioxygenase domain-containing protein	TRAES_3BF041300020CFD_c1	10	2	371	41.1	5.43	metabolic process		catalytic activity;metal ion binding
2.29184	0.00510689	-1.17338	A0A3B5YSS6	Uncharacterized protein		13	4	435	47	5.8
2.02364	0.00947025	-1.17522	A0A3B5YTN2	Aminotran_1_2 domain-containing protein		34	10	438	47.5	6.89
3.05372	0.000883645	-1.17761	A0A3B6I460	Uncharacterized protein		12	3	567	60.2	8.34
2.93065	0.00117313	-1.17854	A0A3B6B3N5	Uncharacterized protein		19	4	299	31.8	9.45
1.97259	0.0106514	-1.17892	A0A3B5ZTG7	Uncharacterized protein		6	2	593	66.3	6.62
1.83637	0.0145758	-1.18269	W5CP67	Uncharacterized protein	TRAES_3BF082800140CFD_c1	4	2	459	53.1	5.24
2.5756	0.00265705	-1.18298	W5ECK8	KOW domain-containing protein		37	3	159	17.7	10.07	metabolic process	ribosome	structural molecule activity
1.83214	0.0147184	-1.18348	A0A3B6PSF9	DNA helicase (EC 3.6.4.12)		24	11	729	80.6	7.84
4.13507	7.32712e-05	-1.18599	A0A3B6RRP9	IGPS domain-containing protein		22	6	329	36	5.62
1.53073	0.0294628	-1.18799	A0A3B6QLU3	Aa_trans domain-containing protein		6	2	530	57.6	5.19
2.19307	0.0064111	-1.19187	A0A3B6IQM3	Transmembrane 9 superfamily member		10	4	585	66.7	8.38
1.34104	0.0455993	-1.19304	A0A3B5ZQR8	DUF1421 domain-containing protein		15	6	574	60.7	6.18
1.57764	0.0264463	-1.19324	J7EN37	Protein phosphatase 2C		14	4	284	30.9	5.08	metabolic process		catalytic activity;metal ion binding
1.59328	0.0255105	-1.19615	Q9ZTU7	Blue copper-binding protein homolog	S85	22	3	176	17.4	5.83	metabolic process	membrane
1.62368	0.0237858	-1.19729	A0A3B6SEP6	Transmembrane 9 superfamily member		10	4	572	65.2	7.87
1.35319	0.044341	-1.19922	A0A7H4LEY4			20	2	205	22.3	9.16
2.25246	0.0055917	-1.1997	A0A3B6CBL2	Bet_v_1 domain-containing protein		59	6	161	17	5.15
1.85639	0.013919	-1.20076	A0A3B6PQ88	Fn3_like domain-containing protein		13	8	774	83.3	6.92
2.21292	0.00612463	-1.20082	A0A3B6I3R0	Uncharacterized protein		25	13	648	71.3	5.27
1.67552	0.0211097	-1.20396	A0A3B6CE64	Uncharacterized protein		7	2	544	57.6	8.56
1.52463	0.0298794	-1.20485	A0A3B6RSP2	Uncharacterized protein		6	3	723	82	6.62
[truncated: 680 more rows]

## Sheet: Table S5
Table S5: List of significantly changed proteins in irradiated wheat roots between flooding and non-flooding.
#NAME?	p-value	Difference	Accession	Protein names	Gene names	Coverage in Percent	Number of Peptides	Number of AAs	MW in kDa	calc pI	Biological Process	Cellular Component	Molecular Function
2.09853	0.00797025	6.33234	A0A3B6ARZ3	Usp domain-containing protein		75	7	169	18	7.91
2.4369	0.00365675	6.266	A0A3B6GP29	Uncharacterized protein		19	6	496	54.4	6.79
2.39785	0.00400082	6.09697	A9U8G0	Alcohol dehydrogenase ADH2A		62	15	379	40.9	6.2	metabolic process		catalytic activity;metal ion binding
1.9958	0.0100973	5.79251	A0A1D6CZK2	Uncharacterized protein		26	2	87	9.7	9.55		membrane
3.3497	0.000446992	5.49626	A0A3B6KGC2	PKS_ER domain-containing protein		44	10	368	39.7	6.02
3.56078	0.000274926	4.98166	A9U8G1	Alcohol dehydrogenase ADH2D		71	16	379	41	6.4	metabolic process		catalytic activity;metal ion binding
3.10707	0.00078151	4.97353	A0A077S3Y0	Fe2OG dioxygenase domain-containing protein	TRAES_3BF041300020CFD_c1	10	2	371	41.1	5.43	metabolic process		catalytic activity;metal ion binding
2.08708	0.00818308	4.91994	A0A3B6UCP5	SCP domain-containing protein		61	5	168	17.9	4.61
1.4558	0.035011	4.80374	A0A3B6KLF4	Uncharacterized protein		5	2	584	63.1	8.88
2.64992	0.00223916	4.72885	A0A3B6NJV1	Glycosyltransferase (EC 2.4.1.-)		6	2	506	55.2	5.85
2.05849	0.00874	4.51777	A0A3B6TYV4	DUF3700 domain-containing protein		67	10	264	28	7.39
1.88899	0.0129126	4.49389	A0A3B5Z2Q5	Uncharacterized protein		41	6	179	18.5	8.68
2.57024	0.00269006	4.48738	A0A3B6AV38	Protein kinase domain-containing protein		10	3	353	40	5.81
2.46634	0.00341713	4.44853	A0A3B6HW41	Uncharacterized protein		23	3	455	43.7	8.88
1.94562	0.0113339	4.43157	C3VQ52	Ascorbate peroxidase (Fragment)	POD1	75	14	243	26.6	5.82	metabolic process;response to stimulus		antioxidant activity;catalytic activity
1.71309	0.0193604	4.43041	A0A3B6MKI7	Pyrophosphate--fructose 6-phosphate 1-phosphotransferase subunit alpha		47	13	450	49	6.52
1.5383	0.0289535	4.2525	A0A3B6LLS8	Uncharacterized protein		42	10	379	40.9	6.24
3.04872	0.000893889	4.24349	A0A3B6LMB6	Uncharacterized protein		6	2	396	43.6	6.8
1.7657	0.0171515	4.23307	A0A3B6H0F0	Uncharacterized protein		23	8	382	42.8	6.87
1.75905	0.0174161	4.18306	A0A3B6C2S1	Uncharacterized protein		32	2	88	10	10.14
3.21789	0.00060549	4.07745	Q5TMB2	Xylanase inhibitor TAXI-IV	Taxi-IV	62	14	408	42	8.32	metabolic process		catalytic activity
2.13937	0.00725494	4.0234	A0A3B5YT45	Uncharacterized protein		12	5	681	74.7	6.32
1.81677	0.0152485	4.01528	A0A3B6JGH7	Uncharacterized protein		20	2	430	41.2	9.06
1.56277	0.0273673	4.00238	A0A3B5Y6T2	Uncharacterized protein		44	3	147	16.1	5.43
1.44125	0.0362038	3.99333	A0A3B6DA12	Ribosomal protein L19		26	4	213	24.6	11.44
2.62208	0.00238737	3.98959	W5CXR9	Peptidase A1 domain-containing protein	TRAES_3BF012400010CFD_c1	21	5	449	48.1	8.4	metabolic process		catalytic activity
1.58266	0.0261419	3.89929	A0A1D5WMG7	Uncharacterized protein		10	2	247	26.5	9.42		mitochondrion;organelle lumen
1.85067	0.0141036	3.8837	A0A3B6IQY9	Uncharacterized protein		62	15	379	40.9	6.28
2.24937	0.00563153	3.88123	M5AJV9	Hemoglobin 1	TaBWHb-1	55	8	162	18	8.12	transport	cytosol;membrane	metal ion binding;transporter activity
2.7132	0.00193555	3.86094	A0A3B5XVI4	Peroxidase (EC 1.11.1.7)		22	5	338	35.7	8.13
1.48449	0.0327722	3.83133	A0A3B6MNW7	Uncharacterized protein		62	16	398	40.9	6.68
3.37534	0.000421369	3.7915	Q53IQ4	Xylanase inhibitor (Fragment)	xi-IIA	39	10	389	40.2	8.07	metabolic process		catalytic activity
1.46641	0.0341658	3.74418	W5E6W1	Uncharacterized protein		55	6	140	15	10.48	metabolic process	ribosome	structural molecule activity
2.12125	0.00756402	3.69813	A0A3B6JHY8	Usp domain-containing protein		28	4	171	18.3	5.92
3.10423	0.000786625	3.65859	A0A3B6KSH9	Uncharacterized protein		24	3	177	19.7	7.39
1.86935	0.0135097	3.64827	B6Z278	Puroindoline b protein	Pinb-D1	12	2	148	16.8	8.73	defense response;regulation of biological process;response to stimulus	extracellular;membrane	enzyme regulator activity
1.45563	0.0350245	3.59925	Q84UH6	Dehydroascorbate reductase	DHAR	74	11	212	23.3	6.29	metabolic process;response to stimulus		antioxidant activity;catalytic activity;protein binding
3.04437	0.00090289	3.59775	A0A3B6JHW0	Uncharacterized protein		59	8	293	31.1	6.51
1.48419	0.0327949	3.59192	A0A3B6RKQ5	HMA domain-containing protein		38	3	110	11.1	4.81
1.67298	0.0212332	3.58646	A0A3B6JEI7	UDP-glucose 6-dehydrogenase (EC 1.1.1.22)		68	21	480	52.8	6.13
2.54519	0.00284975	3.58638	A0A3B6PK44	Ribosomal_L12 domain-containing protein		33	5	192	20.5	9.32
2.58142	0.00262166	3.5711	A0A077RQG5	Uncharacterized protein	TRAES_3BF099900090CFD_c1	26	7	542	58.7	6.74
1.31471	0.04845	3.5583	A0A3B6LV31	rRNA N-glycosidase (EC 3.2.2.22)		37	6	275	29.6	9.74
2.44082	0.00362396	3.5472	A0A3B6EMP8	Uncharacterized protein		25	2	151	16.5	5.21
1.45809	0.0348264	3.46934	F8S6T7	Pathogenesis-related protein 1-7	Pr-1-7	78	5	165	17.8	4.49		extracellular
1.52887	0.0295893	3.46763	A0A3B6SKU1	Fe2OG dioxygenase domain-containing protein		30	6	318	35.3	5.44
2.43245	0.00369448	3.44593	A0A3B6ETX3	Peptidase A1 domain-containing protein		15	4	416	43.5	8.68
2.46754	0.00340772	3.43393	A0A1D5UVD9	Uncharacterized protein	CAMPLR22A2D_LOCUS1644	18	2	227	23.1	5.34		membrane
1.91354	0.0122027	3.42163	A0A3B6LID2	GLTSCR1 domain-containing protein		12	2	348	38.9	4.94
3.6681	0.000214733	3.35979	A0A3B6EM13	Uncharacterized protein		72	12	256	27.3	5.48
2.56522	0.00272131	3.33955	W5C732	Uncharacterized protein	CAMPLR22A2D_LOCUS1654	35	2	100	9.8	9.63
1.37603	0.0420697	3.33877	A0A3B6D5E7	Glyco_hydro_18 domain-containing protein		15	4	310	33.7	9.13
1.36562	0.0430904	3.33522	D0PRB4	Peroxiredoxin	CAMPLR22A2D_LOCUS5300	57	9	218	24	6.79	cellular homeostasis;metabolic process;regulation of biological process		antioxidant activity;catalytic activity
1.69477	0.0201943	3.32899	A0A3B6A144	Uncharacterized protein		38	3	153	16.7	5.27
4.02154	9.51611e-05	3.25705	A0A3B6LFH5	Pyrophosphate--fructose 6-phosphate 1-phosphotransferase subunit alpha (PFP) (6-phosphofructokinase, pyrophosphate dependent) (PPi-PFK) (Pyrophosphate-dependent 6-phosphofructose-1-kinase)	PFP-ALPHA	36	14	664	72.5	7.71
1.85854	0.0138502	3.2428	A0A3B6AWC1	Uncharacterized protein		5	2	543	60.9	7.05
1.87092	0.0134611	3.22768	Q84QI5	GSP-1 Grain Softness Protein (Grain softness protein-1)	Gsp-1 gsp-1	28	4	164	18.2	7.99	regulation of biological process		enzyme regulator activity
2.05105	0.008891	3.21536	P16347	Endogenous alpha-amylase/subtilisin inhibitor (WASI)		32	4	180	19.6	7.21	regulation of biological process		enzyme regulator activity
1.45203	0.0353161	3.20678	A0A077RX59	Translation machinery-associated protein 22	TRAES_3BF278300030CFD_c1	36	4	200	21.3	8.27	metabolic process	cytoplasm;ribosome	RNA binding
1.44196	0.0361442	3.1809	A0A3B6MYA0	Lysine--tRNA ligase (EC 6.1.1.6) (Lysyl-tRNA synthetase)		38	18	609	68.5	5.82
3.06842	0.000854247	3.17341	W5CY88	Peroxiredoxin (EC 1.11.1.15)	TRAES_3BF073600030CFD_c1	85	9	162	17.3	5.31	cellular homeostasis;metabolic process;regulation of biological process		antioxidant activity;catalytic activity
1.57282	0.0267413	3.159	Q53IQ2	Xylanase inhibitor	xi-IB	62	14	401	41.2	8.32	metabolic process		catalytic activity
1.4356	0.0366776	3.15795	Q8GV49	LEA1 protein	LEA1	34	6	224	23.2	8.84
2.04259	0.00906596	3.14754	A0A3B6SEF9	Carboxypeptidase (EC 3.4.16.-)		29	10	474	52.6	6.44
2.22824	0.00591237	3.13851	A0A3B6HUF8	Dirigent protein		14	2	181	18.7	8.09
1.39786	0.0400072	3.13812	A0A3B6TK41	Uncharacterized protein		43	14	544	59.6	5.14
2.25811	0.00551932	3.10695	A0A3B6EKL2	Coatomer subunit delta		10	4	510	56.5	5.85
2.06976	0.00851615	3.07996	A0A3B5ZPT1	Aminotran_1_2 domain-containing protein		65	18	402	43.7	6.55
2.21486	0.00609728	3.04415	A0A3B6TJ86	RRM domain-containing protein		38	6	286	30.9	8.09
3.01702	0.000961561	3.04044	A0A3B6RHB6	Protein kinase domain-containing protein		6	4	856	94	6.92
2.51049	0.00308678	3.03536	A0A3B6D7A9	Usp domain-containing protein		53	6	180	18.8	6.14
2.75143	0.00177242	3.02363	A0A3B5YVZ1	Phospholipid-transporting ATPase (EC 7.6.2.1)		5	3	1072	120.6	7.77
1.83306	0.0146871	3.01786	Q06I92	Fasciclin-like protein FLA14	TRAES_3BF022100060CFD_c1	8	2	245	25	9.14
1.72664	0.0187653	3.01349	A0A3B6ES06	Peptidase A1 domain-containing protein		10	4	418	44.3	8.92
4.07435	8.42662e-05	3.01096	A0A1D5UXT7	Cysteine proteinase inhibitor	CAMPLR22A2D_LOCUS1134	33	3	123	13.1	10.13	regulation of biological process		enzyme regulator activity
1.59292	0.0255319	3.01014	Q1AN57	Mitochondrial L2 ribosomal protein		16	3	319	34.6	10.43	metabolic process	ribosome	catalytic activity;RNA binding;structural molecule activity
2.02167	0.00951328	3.00065	A0A3B6NJ31	Aspartate aminotransferase (EC 2.6.1.1)		53	15	426	47.3	6.99
1.99681	0.0100738	2.86827	A0A3B6MQ77	Glyco_transf_20 domain-containing protein		20	11	894	101.2	5.66
1.6437	0.0227145	2.86286	A0A3B6C8P3	Uncharacterized protein		20	9	543	58.4	8.56
1.62922	0.0234846	2.85533	A0A3B6IK77	Calcium load-activated calcium channel (CLAC channel)		27	4	199	20.9	9.99
1.52286	0.0300011	2.85448	A0A3B5Y692	DNA replication complex GINS protein PSF2		13	2	202	23.3	7.55
1.4681	0.0340326	2.84344	A0A3B6IX48	Uncharacterized protein		18	7	506	55.9	5.36
3.28397	0.000520033	2.84161	A0A3B6CAQ5	HMA domain-containing protein		9	3	308	32.1	5.83
1.75566	0.0175526	2.8413	A0A3B6THM5	Aconitate hydratase (Aconitase) (EC 4.2.1.3)		4	2	688	75.7	6.62
2.03526	0.00922013	2.81795	A0A3B6RAY1	Bet_v_1 domain-containing protein		55	6	160	17.2	5.33
2.45889	0.00347621	2.80845	A0A3B5YYU8	WPP domain-containing protein		29	12	551	59.5	4.67
1.38023	0.0416652	2.78284	A0A3B6LH00	Cellulase domain-containing protein		34	10	504	55.9	6.67
1.3383	0.0458885	2.73374	W5CRK6	Sep15_SelM domain-containing protein	TRAES_3BF078000030CFD_c1	22	2	162	18.2	4.92
1.3503	0.0446377	2.73216	A0A3B6GXI6	DNA-(apurinic or apyrimidinic site) lyase (EC 4.2.99.18)		7	2	517	58	8.79
2.39243	0.00405109	2.72441	A0A3B6TM98	Acyl carrier protein		21	2	132	14.2	5.72
2.22471	0.00596059	2.72177	Q06I93	Fasciclin-like protein FLA13		13	2	267	26.9	5.6
1.70347	0.0197937	2.69944	A0A3B6RG95	Uncharacterized protein		35	22	903	98.5	9.14
2.11286	0.00771156	2.68929	A0A3B6DLW0	Usp domain-containing protein		37	4	164	17.9	7.08
1.55249	0.0280225	2.67687	A0A3B6EGL9	Uncharacterized protein		31	9	493	53.1	7.11
2.51418	0.00306072	2.67609	A0A3B6QNR9	Epimerase domain-containing protein		18	4	345	38.1	8.02
1.60527	0.024816	2.67421	A0A3B6FPZ2	Uncharacterized protein		13	3	218	24.6	7.36
1.49816	0.0317571	2.6641	A0A3B6BXY2	Stress-response A/B barrel domain-containing protein		37	3	111	12.2	5.67
1.36606	0.0430463	2.66337	A0A3B6RG09	Uncharacterized protein		34	6	374	41	5.02
1.6005	0.0250899	2.65918	A0A3B6JED4	VOC domain-containing protein		50	4	142	15.3	6.16
1.40635	0.0392328	2.63024	A0A3B6PMA8	BHLH domain-containing protein		10	2	303	31.7	7.64
2.09501	0.0080351	2.62313	A0A3B6TBN8	GRAM domain-containing protein		29	6	296	31.7	5.86
4.24987	5.62507e-05	2.61541	A0A3B6C6E8	Uncharacterized protein		28	8	425	46.9	5.96
2.05658	0.00877859	2.60118	A0A3B6B4G0	RRM domain-containing protein		19	4	317	33.4	5.19
1.31346	0.0485897	2.59443	A0A3B6IYF2	Uncharacterized protein		45	11	363	39.4	7.01
2.15153	0.00705454	2.56412	A0A3B6N206	Tr-type G domain-containing protein		56	19	447	50.3	7.33
3.81376	0.000153546	2.56107	A0A3B6EQ19	Uncharacterized protein		21	7	378	42.3	6.87
1.3086	0.049136	2.55539	A0A3B6N1A5	Uncharacterized protein		17	3	294	32.5	7.72
1.5603	0.0275236	2.52226	A0A3B6TT11	Uncharacterized protein		68	10	148	16.8	5.16
1.45358	0.0351902	2.51748	A0A3B6JNV3	Uncharacterized protein		7	2	384	42.7	6.55
1.60783	0.0246698	2.50096	A0A3B6EK73	Uncharacterized protein		72	27	557	60.6	5.68
1.36753	0.0429009	2.49603	A0A3B6RKF2	AAI domain-containing protein		16	2	183	17.9	7.78
3.18184	0.000657903	2.47299	A0A3B6T7J7	Uncharacterized protein		56	6	169	18.6	4.56
1.64985	0.0223951	2.46897	A0A3B6LVF9	Uncharacterized protein		9	6	1023	114.4	5.19
1.35862	0.0437907	2.44997	A0A3B6MP76	Uncharacterized protein		55	7	176	20	8.02
1.53107	0.0294397	2.44808	A0A3B6FUH6	Rad21_Rec8_N domain-containing protein		2	2	1408	151.7	4.74
1.84505	0.0142874	2.44224	A4ZIZ6	Monomeric alpha-amylase inhibitor (Fragment)		60	6	121	13.1	7.43	regulation of biological process		enzyme regulator activity
2.1834	0.00655545	2.43731	A0A3B5Y6Y9	Uncharacterized protein		13	5	558	59.6	6.4
1.89989	0.0125925	2.42542	A0A3B6N326	Protein kinase domain-containing protein		8	4	1226	133.6	5.45
1.40408	0.0394382	2.42525	A0A7H4LPR6			17	4	509	52.1	6.13
2.17215	0.0067274	2.4226	A0A3B6JJ66	Uncharacterized protein		61	23	605	64.8	5.87
2.97914	0.00104921	2.42259	A0A3B6KIB1	Glyco_transf_20 domain-containing protein		19	11	891	100.9	5.52
3.46755	0.000340759	2.41273	A0A3B6ML47	Cellulase domain-containing protein		29	9	504	56	6.89
1.41373	0.0385716	2.40381	A0A341ZKV6	Pept_C1 domain-containing protein		47	7	199	20.9	4.79
1.83213	0.0147187	2.3989	W5CT58	Uncharacterized protein	TRAES_3BF046100030CFD_c1	32	3	139	14.9	9.07
1.37545	0.0421256	2.39274	A0A3B6NX87	Uncharacterized protein		11	4	648	70.3	6.73
2.14303	0.00719393	2.38942	A0A3B5Z314	ATP-dependent 6-phosphofructokinase (ATP-PFK) (Phosphofructokinase) (EC 2.7.1.11) (Phosphohexokinase)	PFK	47	16	566	62	7.08
2.24684	0.0056645	2.38173	A0A3B6KCM5	Sulfurtransferase		43	10	332	35.8	5.92
1.45915	0.0347419	2.37678	A0A3B6HU03	Uncharacterized protein		12	2	226	25.1	6.35
1.96347	0.0108775	2.36672	A0A3B5YUS7	Pyridoxal phosphate homeostasis protein (PLP homeostasis protein)		12	2	243	26.1	6.35
2.16384	0.00685748	2.34958	A0A3B6SFC2	Uncharacterized protein		4	2	839	91.4	6.48
1.64333	0.0227337	2.33272	A0A3B6S9M7	40S ribosomal protein S30		18	2	62	6.9	12.03
1.39723	0.0400656	2.32534	A0A3B6JIK0	Uncharacterized protein		22	8	539	57.7	7.03
2.15638	0.00697621	2.32079	A0A3B6B5U1	Uncharacterized protein		10	2	403	42	6.43
1.70876	0.0195542	2.31583	A0A3B6AX48	Uncharacterized protein		4	4	1395	152.7	4.46
1.4571	0.0349062	2.30492	A0A3B6LXA4	Uncharacterized protein		7	3	645	70.4	6.28
1.49648	0.0318804	2.28459	A0A3B6C2R3	Probable 6-phosphogluconolactonase		29	3	175	18.8	4.75
2.20485	0.00623951	2.2816	A0A3B6H0Z1	Uncharacterized protein		22	7	494	54	5.66
1.34264	0.0454323	2.27989	A0A3B6SGS8	Pyrophosphate--fructose 6-phosphate 1-phosphotransferase subunit beta (PFP) (EC 2.7.1.90) (6-phosphofructokinase, pyrophosphate dependent) (PPi-PFK) (Pyrophosphate-dependent 6-phosphofructose-1-kinase)	PFP-BETA	73	27	560	60.6	6.2
1.50756	0.0310772	2.27621	A0A3B6JFS6	Alanine--tRNA ligase (EC 6.1.1.7) (Alanyl-tRNA synthetase) (AlaRS)		38	26	1006	109.5	6.42
2.1713	0.00674059	2.2748	A0A3B6EBZ6	14_3_3 domain-containing protein		71	20	262	29.7	4.74
1.32328	0.0475034	2.27218	A0A3B5ZUU7	RanBD1 domain-containing protein		19	7	430	45.6	4.96
1.92402	0.011912	2.2535	A0A3B6AWW2	SEC7 domain-containing protein		41	42	1585	175.6	5.74
1.38751	0.0409725	2.25328	A0A3B6PLJ7	Glycine cleavage system H protein		15	2	158	17	5.08
1.83481	0.0146281	2.24039	A0A3B6MJS6	Sulfurtransferase		50	15	424	45.1	7.58
1.44323	0.0360384	2.23907	A0A077RWS5	S-adenosylmethionine synthase (EC 2.5.1.6)	TRAES_3BF093000020CFD_c1	79	19	394	42.8	5.96	metabolic process		catalytic activity;metal ion binding;nucleotide binding
1.43111	0.0370586	2.23201	A0A3B6T7X8	Uncharacterized protein		23	4	280	31.9	7.91
2.15542	0.00699173	2.23028	A0A3B6D8R8	DUF4057 domain-containing protein		10	2	248	26.2	8.7
1.93637	0.011578	2.2232	W5D5N0	Uncharacterized protein	TRAES_3BF010400300CFD_c1 TRAES_3BF010600090CFD_c1	11	2	261	26.2	6.54	metabolic process		catalytic activity
2.08481	0.00822602	2.21073	A0A3B6JG17	Uncharacterized protein		15	4	455	51.5	5.41
2.77272	0.00168764	2.20567	A0A7H4LAM2			74	17	369	40.7	6.54
1.35817	0.0438354	2.19824	A0A096USR9	RNA helicase	DEAD1-B	41	19	634	67	7.83			nucleotide binding
1.5556	0.0278226	2.19154	A0A3B6LV38	Diphosphomevalonate decarboxylase (EC 4.1.1.33)		35	8	420	45.9	6.55
1.46247	0.0344767	2.18606	A0A3B6KJU3	TFIIB-type domain-containing protein		7	2	312	34.3	6.43
1.87466	0.0133456	2.17017	A0A3B6TPG7	Uncharacterized protein		73	10	247	27.1	5.17
1.88488	0.0130352	2.16227	A0A3B6FEF4	Uncharacterized protein		38	10	484	51.4	5.41
1.92947	0.0117632	2.16161	A0A3B6EAR1	RING-type domain-containing protein		13	3	375	40.6	5.68
2.71619	0.00192227	2.15946	A0A3B6U1U8	Peroxidase (EC 1.11.1.7)		11	3	314	32.9	6.39
1.87737	0.0132627	2.15856	A0A3B5ZRB4	Protein kinase domain-containing protein		45	11	362	39.4	8.22
1.98249	0.0104114	2.15667	A0A1D5US08	Uncharacterized protein	CAMPLR22A2D_LOCUS5863	14	2	322	34.4	4.49		membrane	protein binding
1.4296	0.0371881	2.15351	A0A1D5UJQ4	Uncharacterized protein	CAMPLR22A2D_LOCUS3692	42	9	214	23.3	5.4
1.46569	0.0342222	2.12706	A0A3B6APF8	Uncharacterized protein		52	7	217	22.9	6.35
2.38052	0.00416373	2.11932	A0A3B6HQX9	Uncharacterized protein		60	23	613	65.8	6.06
1.85999	0.0138043	2.11488	A8QRP5	Grain softness protein (Fragment)	Gsp1B	21	3	163	18.3	7.78
1.37422	0.0422458	2.10878	A0A3B6B2V5	Glutaredoxin domain-containing protein		50	4	129	13.3	7.85
2.0477	0.00895987	2.09378	A4ZCD1	GTP-binding protein	GBP-1	36	14	533	58.9	5.72		cytosol;vacuole	catalytic activity;nucleotide binding
1.72592	0.0187967	2.08582	A0A3B6EEF6	Uncharacterized protein		45	4	121	13.7	7.18
1.34431	0.0452573	2.05272	A0A3B6SKM7	Uncharacterized protein		68	10	148	16.7	5.16
2.13696	0.00729524	2.03575	A0A1D5UL14	Uncharacterized protein	CAMPLR22A2D_LOCUS2805	28	8	425	46.9	5.72
1.42448	0.0376284	2.01692	A0A3B5ZZB4	NOT2_3_5 domain-containing protein		9	3	559	60	8.46
4.41189	3.87359e-05	2.01601	A0A3B6HXQ7	Uncharacterized protein		2	2	853	94.1	5.31
1.39196	0.040555	2.0087	A0A3B6QML0	Uncharacterized protein		44	15	507	54.8	7.64
1.77552	0.016768	1.99258	A0A3B5YWS4	Uncharacterized protein		29	6	296	30.4	9.54
1.38456	0.0412516	1.98967	A0A3B6LHA7	OTU domain-containing protein		16	4	323	35.7	6.42
1.87942	0.0132002	1.95809	A0A3B6TSZ2	UBR-type domain-containing protein		12	3	413	45.6	4.68
1.36113	0.0435384	1.9438	A0A3B6C8C5	Uncharacterized protein		29	6	311	33	6.42
1.63218	0.0233249	1.9167	A0A1D5US77	Uncharacterized protein	CAMPLR22A2D_LOCUS3293	33	7	311	33.1	6.55			protein binding
3.15335	0.000702512	1.91226	A0A3B6A1X7	Uncharacterized protein		17	6	558	59.7	6.65
1.36278	0.043373	1.90706	Q37680	NADH-ubiquinone oxidoreductase chain 5 (EC 7.1.1.2) (NADH dehydrogenase subunit 5)	ND5 NAD5	7	4	670	74.4	7.4	metabolic process;transport	membrane;mitochondrion	catalytic activity
2.76846	0.00170429	1.89857	A0A3B6QB19	HECT domain-containing protein		9	9	1841	198.3	5.67
1.45716	0.034901	1.89745	A0A3B6TPH5	Uncharacterized protein		53	20	537	58.4	6.3
1.97583	0.0105723	1.89247	A0A3B6DPL3	Peroxidase (EC 1.11.1.7)		49	10	341	36	5.91
1.36296	0.0433548	1.88062	Q03033	Elongation factor 1-alpha (EF-1-alpha)	TEF1	67	22	447	49.1	9.13	metabolic process	cytoplasm	catalytic activity;nucleotide binding;RNA binding
2.22399	0.00597049	1.88047	A0A3B6RLY6	Uncharacterized protein		36	6	196	21.2	6.8
1.84311	0.0143512	1.87955	A0A1D5V0L1	GRAS domain-containing protein	CAMPLR22A2D_LOCUS1798	8	3	555	61.3	6.39	metabolic process;regulation of biological process
1.7667	0.0171118	1.87787	A0A3B5Z1E7	PX domain-containing protein		7	2	517	57	6.64
1.8219	0.0150696	1.87688	A0A3B6LL04	Uncharacterized protein		4	3	819	86.6	5.99
1.32903	0.0468786	1.87157	D8L9S7	Uncharacterized protein	pg4 TAA_ctg0954b.00220.1 TRAES_3BF041100010CFD_c1	29	4	226	25.7	4.93			protein binding
1.47937	0.0331614	1.86554	A0A3B6NTZ3	Uncharacterized protein		12	5	755	85.2	4.86
1.30992	0.0489873	1.86551	A0A3B6FIX9	Uncharacterized protein		37	22	803	91.1	6.65
3.22111	0.000601025	1.86125	A0A3B6KLR9	Uncharacterized protein		32	3	197	22.1	5.63
1.46259	0.0344677	1.86088	W5B7W5	Caleosin	Clo2	12	2	244	27.7	6.62
2.60065	0.00250813	1.85855	A0A3B5ZTT5	Inositol-tetrakisphosphate 1-kinase (EC 2.7.1.134)		39	7	352	38.8	6.42
2.29284	0.00509515	1.85208	A0A3B6B6M7	Adenosylhomocysteinase (EC 3.3.1.1)		74	26	481	52.8	5.9
1.40707	0.0391682	1.85194	A0A3B6MN48	PlsC domain-containing protein		18	5	374	42.4	9.64
1.49683	0.0318541	1.8492	A0A3B6MZE4	Uncharacterized protein		9	2	337	37.1	7.24
1.39575	0.0402024	1.84605	A0A3B6TFH3	NAD(P)-bd_dom domain-containing protein		14	2	354	38.2	5.29
1.49306	0.0321319	1.84499	A0A3B6GQP5	Uncharacterized protein		41	8	262	28.3	6.52
1.94138	0.011445	1.84091	A0A3B6DKR8	Glutamyl-tRNA(Gln) amidotransferase subunit A, chloroplastic/mitochondrial (Glu-AdT subunit A) (EC 6.3.5.7)	GATA	5	2	541	57	6.06
1.56411	0.0272832	1.83936	A0A3B5YSR4	7,8-dihydroneopterin aldolase (EC 4.1.2.25)		30	2	135	14.6	5.83
1.74225	0.0181031	1.82808	A0A3B6TNV8	Glycosyltransferase (EC 2.4.1.-)		22	7	475	50.6	5.69
1.57534	0.0265865	1.81929	W5GG94	Cellulose synthase (EC 2.4.1.12)		22	14	1075	121.2	6.87	cell organization and biogenesis;metabolic process	membrane	catalytic activity;metal ion binding
1.32576	0.0472319	1.81289	A0A3B6QNJ6	Methyltransf_2 domain-containing protein		47	9	370	39.5	5.25
1.47254	0.0336868	1.80092	A0A3B6HV04	Ribosomal_TL5_C domain-containing protein		19	3	237	25.5	9.35
1.45694	0.034919	1.8002	P41378	Eukaryotic initiation factor 4A (eIF-4A) (EC 3.6.4.13) (ATP-dependent RNA helicase eIF4A)		76	28	414	46.9	5.48	metabolic process		catalytic activity;nucleotide binding;RNA binding
1.60377	0.0249016	1.77983	A0A3B5Z0D1	Aldo_ket_red domain-containing protein		33	9	320	35.9	7.12
1.58157	0.0262079	1.76402	A0A3B6MUK2	Uncharacterized protein		30	5	204	22.9	7.64
1.41343	0.0385987	1.76322	A0A1D6RLV5	Iso_dh domain-containing protein		35	8	367	39.4	6.73	metabolic process		catalytic activity
2.92689	0.00118335	1.73653	B5TQZ1	Truncated hemoglobin Hb2b		45	6	171	19.6	6.42
1.98003	0.0104706	1.73254	A0A3B6TMH9	Uncharacterized protein		35	6	197	21.4	6.54
1.31818	0.0480645	1.72562	A0A3B5ZVJ0	Uncharacterized protein		34	12	435	47.9	6.18
1.68723	0.0205479	1.71651	A0A3B6TK04	RanBD1 domain-containing protein		19	6	482	51	4.89
1.83259	0.0147031	1.70937	A0A3B6TDT8	Uncharacterized protein		10	3	305	33	6.84
1.95649	0.0110537	1.70871	A0A3B5ZRA1	Uncharacterized protein		45	13	347	37.5	9
1.8634	0.0136963	1.70076	D9ZLW0	Outer membrane channel protein OEP16-2	OEP16-2	16	2	173	17.9	7.27		membrane
1.7172	0.019178	1.68021	A0A3B6LT20	DUF3700 domain-containing protein		72	12	255	26.7	5.85
1.37343	0.0423221	1.67265	A0A0D3MT32	RAR1	RAR1	9	2	233	25.5	7.84	cell death;defense response;metabolic process;regulation of biological process;response to stimulus	cytoplasm;nucleus	metal ion binding;protein binding
2.36252	0.00433988	1.66278	A0A3B6RLI7	Uncharacterized protein		54	34	918	104.5	6.29
2.25013	0.00562179	1.65784	A4UQN3	MBD2		45	7	313	34.6	5.33		nucleus	DNA binding;metal ion binding
1.7303	0.0186079	1.64218	A0A3B6H1U2	LEA_2 domain-containing protein		17	3	238	26.3	9.63
2.16706	0.0068068	1.64108	A0A3B5Z3H0	Ribosomal_L12 domain-containing protein		22	3	245	25.9	9.73
1.7718	0.016912	1.63979	A0A3B6CFB6	Uncharacterized protein		31	12	602	65.5	5.25
2.8639	0.00136804	1.63721	A0A3B6EJB8	Uncharacterized protein		9	4	675	75.9	5.15
2.04077	0.00910398	1.62299	A0A3B6JMI5	BTB domain-containing protein		10	2	230	25.7	6.34
1.98365	0.0103836	1.62219	A0A3B5YQD7	Cellulase domain-containing protein		18	12	1074	117.2	5.69
1.50585	0.0311995	1.61303	A0A3B5YZM3	PH domain-containing protein		37	3	164	18.3	7.34
1.56145	0.0274503	1.61214	A0A3B6EF21	Uncharacterized protein		41	8	262	28.3	6.52
3.75892	0.000174215	1.60644	A0A3B6HR35	Uncharacterized protein		22	4	250	28	9.91
2.42231	0.00378172	1.60411	W5GQY7	OTU domain-containing protein		22	3	208	23.2	5.17
1.73981	0.0182051	1.59337	A0A3B5ZWB5	Nucleoside diphosphate kinase (EC 2.7.4.6)		71	8	151	16.7	6.8
1.64276	0.0227634	1.58406	A0A3B6ISB7	Uncharacterized protein		79	21	368	41.5	6.19
1.58047	0.0262741	1.57753	A0A3B6DAR8	Uncharacterized protein		7	2	335	35.5	7.58
1.86987	0.0134936	1.55521	A0A3B5ZN99	Glucose-6-phosphate isomerase (EC 5.3.1.9)		54	18	567	62.2	7.44
2.655	0.00221312	1.55103	A0A3B6B5P1	Uncharacterized protein		71	19	348	38.9	6.64
1.34433	0.0452554	1.54983	A0A3B6JNR3	Uncharacterized protein		14	9	874	95	5.72
2.19071	0.00644602	1.54625	A0A3B6JNP9	tRNA-synt_1e domain-containing protein		31	12	563	63.6	6.34
1.59342	0.0255022	1.54375	A0A3B6GYI4	Glyco_hydro_18 domain-containing protein		12	2	297	31.4	5.19
2.20208	0.00627938	1.54112	A0A3B6JGQ8	Uncharacterized protein		46	18	537	57.7	5.55
1.36034	0.0436177	1.53696	A0A3B6GX60	DUF1681 domain-containing protein		10	2	307	34	4.93
1.45475	0.0350958	1.53183	A0A3B6A1X2	WD_REPEATS_REGION domain-containing protein		10	3	507	54.9	4.61
2.11726	0.00763381	1.53031	A0A3B6MNV1	RING-type domain-containing protein		4	2	1135	123.2	7.25
2.1425	0.00720283	1.52483	A0A3B5Y470	Usp domain-containing protein		48	9	267	28	5.6
2.01316	0.0097016	1.5239	A0A3B6MTU9	Uncharacterized protein		20	15	1416	151.3	4.68
1.52646	0.029754	1.52103	A0A3B6FXU2	FMN_red domain-containing protein		19	3	202	21.9	6.05
1.52971	0.0295321	1.51481	A0A3B5ZTN5	PHB domain-containing protein		31	6	293	32.2	7.33
2.40102	0.00397171	1.51043	A0A3B5Y5E3	Uncharacterized protein		8	4	721	72.9	8.48
1.42497	0.0375867	1.51024	A0A3B6AV40	Uncharacterized protein		34	11	453	48	5
1.92126	0.0119878	1.50985	A0A3B6KL62	X8 domain-containing protein		18	4	492	52.6	6.24
1.45773	0.0348556	1.50638	O64394	Thioredoxin H-type (Trx-H) (TrxTa)		44	4	127	13.5	5.22	cellular homeostasis;metabolic process;regulation of biological process;transport	cytoplasm	antioxidant activity;catalytic activity
1.57576	0.0265605	1.48956	A0A3B6TK99	MSP domain-containing protein		23	4	243	26.8	8.22
1.59681	0.0253039	1.48817	A0A3B6SFX4	Uncharacterized protein		24	4	256	28.2	7.91
2.92747	0.00118177	1.48647	A0A6G9HC52			29	17	809	86.8	7.87
1.37949	0.0417361	1.48167	A0A077RTQ6	Protein farnesyltransferase subunit beta (FTase-beta) (EC 2.5.1.58)	TRAES_3BF075400020CFD_c1	7	3	488	53	6	metabolic process;regulation of biological process		catalytic activity
1.99466	0.0101237	1.47472	A0A3B5Z0Q3	Uncharacterized protein		15	4	473	49.7	7.34
2.49461	0.00320175	1.47356	A0A1D5YQ12	Ferritin (EC 1.16.3.1)	Fer-5B	32	7	256	28	5.99	cellular homeostasis;metabolic process;transport		catalytic activity;metal ion binding
1.34858	0.0448151	1.47311	A0A481S232	Auxin-repressed 12.5 kDa protein (Fragment)		58	3	114	12.3	9.32
1.65539	0.0221113	1.4712	A0A3B5YYS5	Pyruvate, phosphate dikinase (EC 2.7.9.1)		44	27	939	101.9	5.96
3.2108	0.000615459	1.46457	A0A3B6SV41	Phospholipase D (EC 3.1.4.4)		26	12	826	92.1	6.73
1.30932	0.0490544	1.45378	W5ECK8	KOW domain-containing protein		37	3	159	17.7	10.07	metabolic process	ribosome	structural molecule activity
1.99975	0.0100057	1.45335	A0A3B6KFK6	Uncharacterized protein		8	2	461	51.2	7.34
2.75498	0.00175801	1.45311	A0A3B6CHN3	Protein kinase domain-containing protein		16	6	394	44.2	6.6
1.38935	0.0407991	1.4477	A0A3B6QNU0	Uncharacterized protein		28	3	180	19.2	5.59
1.35967	0.0436848	1.43403	W5EJ68	Protein kinase domain-containing protein		20	5	355	40	5.8	metabolic process;regulation of biological process;response to stimulus		catalytic activity;nucleotide binding
1.7978	0.0159294	1.40604	A0A3B6PKG8	Histone deacetylase (EC 3.5.1.98)	HDA6-B	27	6	458	51	5.66
1.61543	0.0242419	1.40603	A0A3B5ZVH8	Uncharacterized protein		36	7	296	30.4	9.54
1.5449	0.0285168	1.39713	A0A3B6SKZ0	Uncharacterized protein		9	2	339	37	7.64
1.71867	0.019113	1.39534	D3JCC7	Elicitor responsive gene 3	ERG3	71	7	144	15.7	4.07		cytoplasm	protein binding
1.74771	0.017877	1.39191	A0A3B6SFU0	Uncharacterized protein		7	2	396	44.5	6.24
1.72345	0.0189039	1.39015	A0A3B6DP11	Uncharacterized protein		22	12	836	91.7	4.97
2.82209	0.00150628	1.38933	A0A3B6IS82	VOC domain-containing protein		38	4	138	15.3	5.91
1.40041	0.0397729	1.36989	G5CEW6	Eukaryotic translation initiation factor 4G (eIF-4G) (eIF4G) (Eukaryotic initiation factor 4F subunit p220) (eIF-4F p220 subunit)		18	17	1488	162.1	6.54	metabolic process;regulation of biological process		protein binding;RNA binding
2.84221	0.00143811	1.34321	A0A3B6JIS6	Uncharacterized protein		33	5	191	22	10.26
1.59788	0.0252418	1.33991	A0A3B6KE67	Pyrophosphate--fructose 6-phosphate 1-phosphotransferase subunit alpha (PFP) (6-phosphofructokinase, pyrophosphate dependent) (PPi-PFK) (Pyrophosphate-dependent 6-phosphofructose-1-kinase)	PFP-ALPHA	38	14	621	67.6	7.27
1.6179	0.0241046	1.33213	A0A3B6B3A4	Uncharacterized protein		30	10	391	43.4	7.46
2.02999	0.00933274	1.33136	A9U8F9	Alcohol dehydrogenase ADH3D		56	14	379	41.1	6.46	metabolic process		catalytic activity;metal ion binding
1.32003	0.04786	1.31876	A0A3B5YZC8	Uncharacterized protein		53	20	610	66.1	4.63
1.38456	0.0412519	1.31852	A0A3B6GQC0	Uncharacterized protein		50	15	438	48.3	7.47
2.58348	0.00260925	1.31633	A0A3B5ZX55	PH domain-containing protein		38	3	167	18.5	6.58
2.22085	0.00601385	1.31592	A0A3B6MXV6	Protein kinase domain-containing protein		8	3	562	62.1	6.93
1.89374	0.0127719	1.31417	A0A3B6TG32	RING-type domain-containing protein		19	4	330	34.5	4.72
2.4444	0.00359418	1.31045	A0A3B6LNG6	Uncharacterized protein		17	3	236	26.1	6.09
1.64403	0.022697	1.30452	A0A3B6HWR8	Uncharacterized protein		44	8	268	30.1	5.74
1.33051	0.0467191	1.29514	A0A3B6AV87	Mitochondrial pyruvate carrier		45	4	105	11.8	10.01
1.3365	0.0460782	1.29203	A0A3B6NSD9	BRO1 domain-containing protein		8	2	344	37.5	7.44
2.62442	0.00237453	1.28851	W5F714	Protein kinase domain-containing protein		19	7	490	53.8	6.23	metabolic process		catalytic activity;nucleotide binding;protein binding
2.54521	0.00284964	1.2872	A0A3B6JIZ6	Macro domain-containing protein		41	5	200	21.4	6.2
1.59611	0.0253451	1.28508	A0A3B6GVF8	Uncharacterized protein		5	2	730	75.3	7.97
1.33004	0.0467691	1.28242	A0A3B6C512	Uncharacterized protein		11	3	428	44.6	8.21
2.31132	0.00488293	1.28143	A0A3B6TTA7	Phospholipase D (EC 3.1.4.4)		29	14	824	92.2	6.51
2.38554	0.00411584	1.27747	A0A3B6DJE5	PPM-type phosphatase domain-containing protein		38	8	342	37.2	7.53
1.5073	0.0310958	1.2756	A0A3B5Z0L3	PRA1 family protein		25	3	220	23.1	9.04
2.13768	0.00728316	1.26939	A0A3B6RCG7	Uncharacterized protein		22	12	1268	136.7	4.65
1.49478	0.0320048	1.2669	A0A3B6KNZ6	Uncharacterized protein		3	3	1404	142.7	9.48
2.17112	0.00674341	1.26405	A0A3B6LWF2	Uncharacterized protein		29	5	214	23.4	7.11
1.38847	0.0408815	1.26366	A0A3B6KSY1	Uncharacterized protein		29	7	491	53.2	4.94
1.79068	0.0161926	1.25887	A0A1D5XAT0	Uncharacterized protein		35	5	199	21.4	7.28			catalytic activity;nucleotide binding
1.46613	0.0341879	1.25157	A0A3B6RNY6	Uncharacterized protein		6	2	370	42.9	8.25
2.12346	0.00752553	1.25085	A0A3B6QBC1	Ubiquitin-like domain-containing protein		9	6	964	99.2	4.92
1.36275	0.0433764	1.24792	A9UIE5	Protease inhibitor-like protein		27	2	131	13.4	8.51	metabolic process		catalytic activity
1.33522	0.0462146	1.23215	A0A3B6A2S9	Uncharacterized protein		64	20	423	47.8	5.94
1.35774	0.0438789	1.22704	P24846	4-hydroxy-tetrahydrodipicolinate synthase 1, chloroplastic (HTPA synthase 1) (EC 4.3.3.7)		25	5	388	42.4	7.39	metabolic process		catalytic activity
1.94468	0.0113585	1.22532	A0A3B6AWS8	Uncharacterized protein		8	2	299	34.2	8.62
1.32257	0.0475807	1.21197	A0A3B6B5Z1	Uncharacterized protein		32	16	861	94.3	5.06
1.49584	0.0319269	1.21139	A0A3B5YY75	Inositol-tetrakisphosphate 1-kinase (EC 2.7.1.134)		44	8	353	38.9	6.42
1.32121	0.04773	1.20899	A0A3B5ZQT4	Uncharacterized protein		71	13	252	26.9	7.4
1.65313	0.0222264	1.1953	A0A3B6KPG3	Diphosphomevalonate decarboxylase (EC 4.1.1.33)		35	8	420	45.9	6.38
2.00652	0.00985101	1.1941	A0A3B6JKD1	Uncharacterized protein		31	6	326	34.5	7.08
1.31096	0.0488693	1.18935	A0A3B6I0Y2	ANK_REP_REGION domain-containing protein		18	2	208	21.8	4.45
1.67333	0.0212165	1.18871	A0A3B6MKZ7	Cellulase domain-containing protein		31	8	488	54	6.81
1.31794	0.0480907	1.18095	A0A3B6PSZ5	Alpha-amylase (EC 3.2.1.1) (1,4-alpha-D-glucan glucanohydrolase)		36	9	425	47.1	6.38
1.52793	0.0296531	1.1806	A0A3B5Z4E1	Uncharacterized protein		37	3	176	19.3	5.17
2.41876	0.00381281	1.17522	A0A3B6EC41	Uncharacterized protein		7	2	487	52.8	6.29
1.90319	0.0124971	1.17516	A0A3B6RGY1	RING-type domain-containing protein		10	2	491	54.8	7.88
1.73184	0.0185422	1.17383	W5D653	PRA1 family protein	TRAES_3BF115600010CFD_c1	25	2	190	20.3	8.22	transport	membrane
1.43584	0.0366572	1.17012	A0A3B6HUX8	PKS_AT domain-containing protein		46	11	376	39.8	8.38
2.74949	0.00178035	1.16154	W5D6S5	S-formylglutathione hydrolase (EC 3.1.2.12)	TRAES_3BF047500040CFD_c1	47	8	290	31.6	6.61	metabolic process	cytoplasm	catalytic activity
1.57472	0.0266247	1.15282	A0A3B6LL14	Ferrochelatase (EC 4.99.1.1)		27	7	484	53.5	6.9
1.77354	0.0168446	1.15222	A0A3B6QHG3	Elongation factor Tu		36	11	470	50.5	6.28
1.42343	0.0377195	1.14992	A0A3B6SGY8	RING-type domain-containing protein		17	3	491	54.9	7.88
1.61539	0.0242444	1.13776	A0A3B6TJS0	NAD(P)-bd_dom domain-containing protein		42	9	376	41.8	7.01
1.73111	0.0185735	1.13587	A0A3B6T8T6	Uncharacterized protein		25	6	407	44.4	5.91
1.53535	0.0291506	1.13418	A0A3B6B0R2	Uncharacterized protein		39	12	503	54.9	5
1.44605	0.0358052	1.12929	A0A3B6C526	Exo84_C domain-containing protein		11	6	725	79.1	5.36
2.11034	0.00775631	1.12423	A0A3B6ECK5	UPF0020 domain-containing protein		7	2	475	53.8	7.34
1.72774	0.018718	1.11731	A0A3B6RNA7	Uncharacterized protein		28	9	531	59.4	8.84
2.00598	0.00986326	1.11423	A0A3B6TSS3	WD_REPEATS_REGION domain-containing protein		9	3	485	53.7	8.4
1.81126	0.0154435	1.11371	A0A3B6GTM0	Uncharacterized protein		56	9	248	27.8	7.69
2.41176	0.00387471	1.11193	A0A3B6D9C9	MHD domain-containing protein		25	9	451	50.4	6.58
1.40445	0.0394048	1.10115	A0A3B6RIG1	TOG domain-containing protein		19	4	376	40.2	5.31
2.16627	0.0068191	1.09689	A0A3B6GZN7	Uncharacterized protein		22	2	134	15.1	9.07
1.82338	0.0150182	1.09093	A0A3B5XW23	Kinesin-like protein		18	8	745	83.3	5.44
1.42921	0.0372216	1.09003	A0A3B6LX26	Uncharacterized protein		19	2	154	16.7	5.8
1.77177	0.0169135	1.08965	A0A3B6B5C9	Uncharacterized protein		21	5	298	33.1	5.14
1.70029	0.0199394	1.08867	A0A3B6HRV4	NAB domain-containing protein		2	3	2380	271.4	4.94
2.13908	0.00725971	1.08841	A0A3B6D7U8	Uncharacterized protein		9	2	156	17.4	5.33
1.40661	0.0392092	1.08778	A0A3B6NP18	Protein kinase domain-containing protein		10	3	315	34.7	8.72
1.56672	0.0271194	1.08227	A0A3B6GPC8	Uncharacterized protein		22	5	357	36.1	9.31
2.51475	0.00305668	1.08153	A0A3B5ZS79	Uncharacterized protein		20	11	964	107.3	5.47
1.35611	0.0440442	1.07408	A0A3B6FVN1	Uncharacterized protein		57	14	359	41.2	6.54
2.41414	0.00385357	1.0726	A0A3B6JJX2	Uncharacterized protein		5	4	1225	138.4	6.46
1.62357	0.0237921	1.06658	A0A3B6ILK9	Uncharacterized protein		30	48	2621	286.4	7.28
1.31412	0.0485158	1.05242	A0A3B6H2Q5	Thioredoxin domain-containing protein		31	6	210	23.7	6.18
1.57807	0.0264197	1.05067	A0A3B5ZWY1	Uncharacterized protein		17	4	364	40.1	7.24
2.31333	0.00486043	1.03942	A0A3B6SQH9	Uncharacterized protein		11	10	1279	137.4	5.59
1.77756	0.0166893	1.02888	A0A3B6ILN4	Adenylyl cyclase-associated protein		40	12	480	51	6.87
1.41302	0.0386349	1.02001	A0A3B6NLF4	Uncharacterized protein		24	52	4042	440.5	4.04
1.65072	0.0223501	1.01984	A0A3B6ISW3	t-SNARE coiled-coil homology domain-containing protein		18	3	273	30.7	8.84
2.50787	0.00310551	1.01268	A0A3B6NJD4	L-lactate dehydrogenase (EC 1.1.1.27)		62	11	358	38	7.06
1.51815	0.0303286	1.00954	A0A3B6LRA4	WD_REPEATS_REGION domain-containing protein		29	7	408	44.5	4.94
1.55891	0.0276112	1.00622	A0A3B6HW85	Uncharacterized protein		52	18	648	72.4	6.13
1.61908	0.0240391	1.00363	A0A3B5XUN5	Uncharacterized protein		20	4	294	32.8	8.91
1.31487	0.0484323	0.991965	W5D2H2	Uncharacterized protein	TRAES_3BF077700040CFD_c1	27	4	255	26.9	4.79
1.38234	0.0414626	0.979753	A0A3B6PG11	Uncharacterized protein		26	5	254	27.2	9.6
1.8743	0.0133567	0.978275	A0A3B5YUP3	Phosphotransferase (EC 2.7.1.-)		11	3	463	50.2	6.14
1.37789	0.0418897	0.975348	A0A3B6SDH3	Uncharacterized protein		43	3	124	13	8.78
1.86089	0.0137757	0.96668	A0A3B6HSK0	S1 motif domain-containing protein		24	7	339	38.2	5.39
1.46891	0.0339697	0.965593	A0A3B5ZQT0	Cellulase domain-containing protein		24	9	632	69.4	5.45
3.11768	0.000762638	0.954688	A0A3B6EUZ4	Uncharacterized protein		11	2	371	39.7	5.3
1.5758	0.0265583	0.945867	A0A3B6RJY9	Myb-like domain-containing protein		21	3	311	32.9	7.39
1.36247	0.0434043	0.944638	A0A3B6JLH1	Uncharacterized protein		20	9	713	79.9	5.88
1.42444	0.0376319	0.943371	W5D0N2	L51_S25_CI-B8 domain-containing protein	TRAES_3BF161200030CFD_c1	20	2	119	13.6	10.56
2.50219	0.00314638	0.940771	A0A3B6AWR5	Uncharacterized protein		28	9	508	54.9	8.46
1.51165	0.0307855	0.940705	A0A3B6N1Q6	ULP_PROTEASE domain-containing protein		6	4	1108	123.2	4.55
2.48186	0.00329713	0.939541	A0A3B6GTQ1	Uncharacterized protein		24	4	201	21.9	5.16
1.66042	0.0218566	0.924876	A0A3B6NVV7	RIC1 domain-containing protein		3	3	1125	126	6.54
1.53875	0.0289232	0.922085	A0A3B6CCC4	Phospholipid scramblase		8	2	360	40	8.87
2.07249	0.00846281	0.89993	A0A3B6MPA3	Uncharacterized protein		3	2	617	70.3	7.46
1.81386	0.0153512	0.897098	A0A3B6QDG2	Peroxiredoxin (EC 1.11.1.15)		34	6	226	23.3	7.94
1.78108	0.0165548	0.88602	A0A3B6MN30	Uncharacterized protein		35	70	3631	401.6	5.29
1.81259	0.015396	0.883065	A0A3B6C7W0	PPM-type phosphatase domain-containing protein		18	4	284	30.6	6
1.36563	0.043089	0.879992	A0A3B6MXM1	Uncharacterized protein		18	4	376	40.8	5.58
2.28615	0.00517431	0.878882	W5C909	DAHP_synth_1 domain-containing protein	CAMPLR22A2D_LOCUS854	34	7	291	31.6	7.88	metabolic process	cytoplasm	catalytic activity
2.15748	0.0069585	0.878535	A0A3B6TLT2	Uncharacterized protein		62	6	157	16.8	6.16
2.49581	0.00319294	0.875183	A0A3B6BXM4	Oxidored_FMN domain-containing protein		74	18	369	40.7	6.48
1.56951	0.0269456	0.869318	A0A3B6H149	tRNA-binding domain-containing protein		26	13	616	67.2	7.37
2.06641	0.0085821	0.859023	A0A3B6KUH5	Uncharacterized protein		16	3	326	36.2	5.11
1.38246	0.0414514	0.850466	A0A3B5ZRE8	Uncharacterized protein		46	29	835	92.6	5.17
1.63426	0.0232137	0.84597	A0A3B6TM70	RRM domain-containing protein		7	2	301	32.3	9.16
1.56197	0.0274175	0.832883	A0A3B6KMB4	Peroxidase (EC 1.11.1.7)		26	5	320	34	5.94
1.39067	0.0406757	0.830809	A0A3B6C520	Uncharacterized protein		10	2	293	31.9	9.04
1.68505	0.0206515	0.808176	A0A3B6QFB3	Uncharacterized protein		6	4	1188	134.5	5.5
1.45767	0.03486	0.801446	A0A3B6GQI1	Uncharacterized protein		74	11	193	22.1	7.53
1.303	0.0497736	0.791131	A0A3B6RGV2	Uncharacterized protein		10	9	1778	198.4	6.74
1.94966	0.011229	0.787846	A0A3B6EBP1	Uncharacterized protein		19	3	276	30.7	8.57
3.34193	0.000455063	0.787512	A0A3B6C807	Uncharacterized protein		12	3	545	60.3	9.39
1.55573	0.0278141	0.784947	A0A3B6CI29	Sulfotransferase (EC 2.8.2.-)		48	10	326	36.7	6.44
1.81829	0.0151954	0.780645	A0A3B6SH88	DUF953 domain-containing protein		55	5	130	14.4	4.98
1.60814	0.0246526	0.779308	A0A3B6EHZ9	Uncharacterized protein		4	2	689	77	6.34
2.97277	0.0010647	0.778607	A0A1D6DI56	Uncharacterized protein	CAMPLR22A2D_LOCUS1441	37	10	452	49.9	8.07	metabolic process;regulation of biological process;response to stimulus		catalytic activity;nucleotide binding;protein binding
1.87131	0.0134491	0.776423	A0A3B6IPC0	Uncharacterized protein		17	4	478	53.5	7.49
1.97561	0.0105777	0.775409	W4ZPL7	PRA1 family protein		12	2	209	24.2	10.43	transport	membrane
1.51241	0.0307322	0.768961	A0A3B6JMK0	Uncharacterized protein		22	8	508	56.1	5.49
1.45684	0.0349273	0.765742	A0A3B5Z5U2	WD_REPEATS_REGION domain-containing protein		13	5	476	52.3	8.1
1.41326	0.0386138	0.762397	A0A3B6FRH4	Beta-adaptin-like protein		32	15	841	92.7	5.38
1.44802	0.0356432	0.759083	A0A3B5ZND1	Pex14_N domain-containing protein		15	5	475	50.8	6.29
2.08613	0.008201	0.758463	A0A3B5Y2C2	Uncharacterized protein		32	12	475	52.1	7.24
2.07849	0.00834661	0.756321	A0A3B5ZSR1	Uncharacterized protein		34	9	489	53.2	5.26
1.66381	0.0216864	0.755623	A0A3B6KEC1	Uncharacterized protein		24	3	232	24.9	6.16
1.4323	0.0369576	0.748577	A0A1D6SEC2	Uncharacterized protein		31	4	221	24.7	9.42	transport	membrane
1.65194	0.0222875	0.745715	A0A3B6B764	Uncharacterized protein		26	11	543	59.5	5.9
1.69561	0.0201553	0.734993	A0A3B6TSC7	Amino_oxidase domain-containing protein		9	4	498	55.9	6.42
1.65651	0.0220543	0.726138	A0A3B6EM16	Uncharacterized protein		8	4	714	80.4	5.82
2.02173	0.00951195	0.724774	A0A3B6NVI4	Glyco_transf_20 domain-containing protein		19	11	848	93.9	6.92
1.8604	0.0137912	0.724537	A0A3B6N2Z1	Lipoxygenase (EC 1.13.11.-)		39	22	868	96.9	5.92
1.54735	0.0283563	0.723971	A0A3B6JHY1	Uncharacterized protein		27	7	416	44.2	8.27
1.7446	0.0180054	0.720602	U3PY10	Autophagy protein 5	ATG5b	12	2	370	41.1	5.16	defense response;metabolic process;response to stimulus;transport	cytoplasm
1.87025	0.0134818	0.71708	A0A3B6TC80	Phosphoacetylglucosamine mutase (PAGM) (EC 5.4.2.3) (Acetylglucosamine phosphomutase) (N-acetylglucosamine-phosphate mutase)		18	6	554	59.4	5.68
1.45216	0.0353054	0.70906	A0A3B6ENW8	Uncharacterized protein		20	8	573	60.2	6.28
1.47762	0.033295	0.693584	A0A3B6RL97	Uncharacterized protein		14	7	737	81.3	5.54
2.12516	0.00749618	0.678917	A0A3B5Y3Y4	Poly [ADP-ribose] polymerase (PARP) (EC 2.4.2.-)		14	9	824	91.8	5.29
2.56774	0.00270556	0.675927	A0A3B6KTP8	Protein kinase domain-containing protein		22	8	524	58.4	6.64
2.2121	0.00613625	0.672573	A0A3B6KE69	AMP-binding domain-containing protein		22	9	691	75.8	7.24
1.73525	0.0183971	0.6697	A0A1D5UJ66	Uncharacterized protein	CAMPLR22A2D_LOCUS5684	27	9	497	54	4.78			metal ion binding
1.99984	0.0100036	0.668282	A0A3B6PM66	Uncharacterized protein		54	16	384	43	6.84
1.6592	0.021918	0.655684	A0A3B6GVD0	Uncharacterized protein		37	13	601	67.3	4.81
1.95382	0.011122	0.653202	A0A3B6JNS3	Uncharacterized protein		12	10	1089	115	5.8
1.66667	0.0215443	0.650926	A0A3B6D806	Lactamase_B domain-containing protein		9	2	330	37	7.28
1.35807	0.0438464	0.648929	A0A3B5YVW2	Uncharacterized protein		20	16	1028	112.7	5.86
1.43212	0.0369728	0.642273	A0A3B5YYD8	Uncharacterized protein		31	17	903	99.8	5.82
2.12157	0.00755836	0.640909	A0A3B6RIT4	Tr-type G domain-containing protein		25	17	994	110.2	5.4
2.94551	0.00113368	0.617948	P08823	RuBisCO large subunit-binding protein subunit alpha, chloroplastic (60 kDa chaperonin subunit alpha) (CPN-60 alpha) (Fragment)		22	10	543	57.5	4.91	metabolic process	cytoplasm	nucleotide binding
1.9198	0.0120283	0.610038	A0A3B6D9S0	5-formyltetrahydrofolate cyclo-ligase (EC 6.3.3.2)		14	2	280	30.7	8.97
1.5991	0.0251708	0.603264	A0A3B5XZ44	Uncharacterized protein		5	2	457	50.9	7.21
2.45066	0.00354273	0.599286	A0A3B6B3M2	Uncharacterized protein		6	11	3077	333.5	6.13
1.64685	0.0225499	0.589587	A0A077RR09	Uncharacterized protein	TRAES_3BF002700080CFD_c1	23	2	132	14.9	9.39		mitochondrion
3.68574	0.000206187	0.585672	A0A3B6QH28	Uncharacterized protein		41	33	968	110.1	6.11
1.41612	0.0383603	-0.59713	A0A3B6REU6	Uridine kinase (EC 2.7.1.48)		8	3	489	54.5	6.62
2.2067	0.00621301	-0.604114	W5D157	WPP domain-containing protein	TRAES_3BF078000050CFD_c1	59	23	554	59.9	4.65			protein binding
1.9052	0.0124393	-0.605767	A0A3B6KR15	DUF2428 domain-containing protein		5	7	2145	239	6.24
1.5038	0.0313474	-0.60595	A0A1D5ZWJ3	TLC domain-containing protein		10	3	315	36.8	7.91		endoplasmic reticulum;membrane
2.1611	0.0069008	-0.623458	A0A3B6HVN6	Alpha-L-AF_C domain-containing protein		25	9	706	77.6	5.77
1.49389	0.0320711	-0.62499	A0A3B6NRB2	Uncharacterized protein		12	2	311	36.3	6.07
1.47348	0.0336136	-0.625766	A0A3B6TBX4	AAA domain-containing protein		6	3	972	107.7	5.8
1.49144	0.0322525	-0.654668	A0A3B6HU25	Uncharacterized protein		14	5	586	65.4	6.54
2.93611	0.00115848	-0.661591	A0A3B6CCY3	NAD(P)-bd_dom domain-containing protein		30	9	412	45	8.85
1.76352	0.0172376	-0.664756	A0A3B6JRT5	PKS_ER domain-containing protein		27	6	382	40.5	8.6
1.75444	0.0176021	-0.673036	A0A3B6D9J6	Sulfotransferase (EC 2.8.2.-)		29	5	339	37.9	7.55
1.76873	0.0170322	-0.675267	A0A3B6EAV5	Glutamine-dependent NAD(+) synthetase (EC 6.3.5.1) (NAD(+) synthase [glutamine-hydrolyzing])		11	4	737	83.1	6.05
2.23616	0.00580548	-0.675918	A0A3B6LGD7	Uncharacterized protein		18	5	532	57	6.7
1.87959	0.0131949	-0.677203	A0A3B6PFA6	HECT domain-containing protein		9	9	1851	199.4	5.67
2.18581	0.00651914	-0.691102	A0A3B6U6I2	SpoU_methylase domain-containing protein		2	2	1801	201.7	6.23
1.48825	0.0324902	-0.691113	A0A3B5ZSC8	Uncharacterized protein		19	4	350	38.1	9.1
1.32789	0.0470012	-0.691875	W5CV16	Uncharacterized protein	TRAES_3BF092900020CFD_c1	3	2	982	110.9	6.99			nucleotide binding;protein binding
1.36853	0.0428025	-0.70126	A0A3B6MKB8	Uncharacterized protein		19	7	598	64.5	5.06
3.59394	0.000254721	-0.723508	A0A3B6HY51	Uncharacterized protein		30	49	2621	286.5	7.33
1.41202	0.038724	-0.723744	A0A3B6HQJ0	Uncharacterized protein		12	4	430	49.6	8.15
2.34705	0.00449725	-0.741743	A0A3B5ZNP9	Poly [ADP-ribose] polymerase (PARP) (EC 2.4.2.-)		5	3	982	110.3	8.65
1.43786	0.0364871	-0.750281	A0A3B6PRG3	Uncharacterized protein		3	2	797	89.7	6.4
1.8761	0.0133014	-0.754638	A0A3B6LV48	Uncharacterized protein		56	4	153	17.3	10.13
3.7748	0.000167958	-0.758437	A0A3B6LSQ4	Ornithine aminotransferase (EC 2.6.1.13)	OAT-5B	20	6	468	51	7.08
2.43659	0.00365937	-0.760996	A0A3B5ZQQ0	Chromatin-remodeling complex ATPase		11	9	999	116.3	7.71
2.11642	0.00764857	-0.765098	A0A3B6MVE9	Uncharacterized protein		28	9	443	48.9	5.36
2.39193	0.00405572	-0.767879	A0A3B6QCH4	Peptidase_S9 domain-containing protein		13	6	783	85.7	5.92
2.15861	0.00694043	-0.769826	A0A3B6D8S1	Pectin acetylesterase (EC 3.1.1.-)		26	7	413	45.1	8.38
1.4172	0.0382647	-0.769877	A0A3B6JNZ9	Uncharacterized protein		37	8	323	36.1	6.73
1.33452	0.0462894	-0.779878	A0A3B6SEA4	Aa_trans domain-containing protein		9	4	447	49.8	8.87
1.54847	0.0282832	-0.813693	A0A3B5YT00	Nuclear pore complex protein		9	7	1069	120.8	4.93
2.38577	0.0041137	-0.813718	A0A3B6UAC4	Uncharacterized protein		41	3	206	21.8	7.14
1.51266	0.0307144	-0.824264	A0A3B6H3H3	Hexosyltransferase (EC 2.4.1.-)		4	2	634	73.2	8.57
2.00237	0.00994551	-0.830168	A0A077RF27	Uncharacterized protein	TRAES_3BF040600070CFD_c1	9	8	1319	147.5	9.01	transport		catalytic activity;nucleotide binding;transporter activity
2.02869	0.00936072	-0.830897	A0A3B6CEX9	Uncharacterized protein		10	4	549	61.8	6.33
1.52344	0.0299609	-0.834547	A0A3B6MJP3	Uncharacterized protein		33	5	209	22.4	7.14
2.08198	0.00827984	-0.845248	A0A3B6D594	Amidase domain-containing protein		19	7	598	65.1	5.81
1.54163	0.0287326	-0.850373	A0A3B6PNM3	Uncharacterized protein		3	5	1744	195.5	4.96
1.85633	0.0139209	-0.856211	A0A3B6ARA1	Vps54 domain-containing protein		19	10	994	108.7	5.95
1.56134	0.0274576	-0.866575	A0A3B6C9Z6	Uncharacterized protein		11	3	377	41.2	6.61
1.36184	0.0434667	-0.867656	A0A3B6TG62	Peptidase_S9 domain-containing protein		16	7	736	81.2	5.39
2.79363	0.00160831	-0.886727	A0A3B6SJ29	Uncharacterized protein		53	10	235	25.3	5.44
1.47512	0.0334876	-0.888317	A0A3B6FM34	SMK-1 domain-containing protein		9	4	880	99.4	5.36
1.49697	0.0318442	-0.896765	A0A3B6EIE9	Methyltransf_11 domain-containing protein		14	5	505	57.1	5.36
1.75988	0.0173829	-0.906374	A0A3B6QHT7	Peroxidase (EC 1.11.1.7)		12	3	334	36.1	7.72
1.97474	0.010599	-0.918935	A0A3B6SJG2	Uncharacterized protein		7	5	1247	138.1	6.43
1.56261	0.0273775	-0.923408	A0A3B6PVE8	Ubiquitin carboxyl-terminal hydrolase (EC 3.4.19.12)		46	8	339	37.9	5.05
1.35134	0.0445309	-0.927332	A0A3B6QDV1	Uncharacterized protein		3	2	1302	141.4	7.66
2.00899	0.0097951	-0.931856	A0A3B6ED92	DNA polymerase epsilon subunit (EC 2.7.7.7) (DNA polymerase II subunit 2)		7	2	533	59.9	5.29
1.5431	0.0286353	-0.949379	A0A3B6HRU8	Uncharacterized protein		10	10	1568	179.1	5.66
1.35111	0.0445547	-0.952788	A0A3B6LS51	Uncharacterized protein		10	3	406	44	6.92
1.73771	0.0182932	-0.957056	A0A3B5XYD6	EMC1_C domain-containing protein		30	20	989	109.5	6.95
1.60942	0.0245798	-0.957827	A0A3B5ZY13	Patatin (EC 3.1.1.-)		27	7	405	44.4	6.7
1.52095	0.0301334	-0.962511	A0A3B6RNS3	Uncharacterized protein		10	3	460	49.8	6.01
2.60311	0.00249395	-0.968347	A0A3B6MSU8	PKS_ER domain-containing protein		38	9	356	37.3	5.67
1.65946	0.0219049	-0.969773	A0A3B6NUW2	CULLIN_2 domain-containing protein		10	6	736	85.4	7.34
1.92458	0.0118966	-0.972105	A0A3B6KPY8	Uncharacterized protein		36	12	469	51.7	8.98
1.97877	0.010501	-0.984351	Q9ZTW6	Histidyl-tRNA synthetase (EC 6.1.1.21) (Fragment)		34	15	479	54	5.45	metabolic process	cytoplasm;cytosol	catalytic activity;nucleotide binding
2.23211	0.00585984	-0.984696	A0A3B6EEB5	Uncharacterized protein		12	5	658	72.6	8.16
1.55448	0.0278946	-0.990115	A0A3B6LI23	Uncharacterized protein		26	5	310	33.2	4.74
1.84648	0.0142405	-0.998619	A0A3B6CCG6	Phenylalanine ammonia-lyase (EC 4.3.1.24)		26	13	713	77.1	6.21
1.49826	0.03175	-1.00805	A0A3B6CIV0	Uncharacterized protein		4	3	528	58.6	6.95
1.74705	0.017904	-1.03915	A0A3B6C3K3	Uncharacterized protein		20	14	987	113	6.04
1.78509	0.0164023	-1.04865	A0A3B6EJE8	Uncharacterized protein		3	2	993	110.5	5.44
1.31005	0.0489727	-1.05016	A0A3B6IUZ5	Uncharacterized protein		18	4	247	28	7.91
2.01459	0.00966957	-1.05612	A0A3B6UAQ8	Uncharacterized protein		12	5	682	75.3	4.81
1.62144	0.0239089	-1.06846	A0A3B6LTP0	Uncharacterized protein		23	8	764	78.6	7.39
1.37413	0.0422538	-1.0769	A0A3B6KIW5	Uncharacterized protein		24	18	1430	153	4.67
3.94617	0.000113195	-1.07908	A0A3B6RGH6	Importin N-terminal domain-containing protein		13	7	1028	112.7	4.72
1.6349	0.0231795	-1.09384	A0A3B6ETV2	Lipase_GDSL domain-containing protein		10	2	375	41.5	6.52
1.4512	0.0353834	-1.09946	A0A3B6RDQ1	Uncharacterized protein		15	5	503	56.8	8.76
1.31707	0.048187	-1.1184	A0A3B6TDB6	Uncharacterized protein		24	5	368	40.2	5.9
1.41708	0.0382756	-1.13067	A0A3B6NWF6	DUF862 domain-containing protein		19	3	280	29.5	6.4
1.76525	0.0171694	-1.13599	A0A3B5Y0N6	Uncharacterized protein		21	9	719	78.4	8.57
1.33886	0.0458286	-1.13918	A0A3B6JIC3	Uncharacterized protein		28	5	255	28.6	5.71
1.56537	0.0272037	-1.14699	W5CY81	Fe2OG dioxygenase domain-containing protein	TRAES_3BF168600030CFD_c1	15	4	349	39.2	5.71	metabolic process		catalytic activity;metal ion binding
1.55873	0.0276229	-1.1503	A0A3B6CES2	Polysacc_synt_4 domain-containing protein		30	5	316	33.7	7.06
1.71229	0.0193957	-1.16917	A0A3B6LHR4	Usp domain-containing protein		20	2	166	17.9	7.05
1.50545	0.0312281	-1.17012	A0A3B5YUW7	SHSP domain-containing protein		14	2	218	23.2	8.98
1.75777	0.0174674	-1.17204	A0A3B6SHJ7	DNA-directed RNA polymerase subunit (EC 2.7.7.6)		3	4	1852	205.9	5.95
1.37687	0.0419886	-1.17249	A0A3B6CEZ1	Uncharacterized protein		3	3	1661	185.3	8.48
2.17322	0.00671084	-1.17348	A0A3B6RSZ0	AAA domain-containing protein		10	4	686	72.6	5.54
2.29169	0.00510875	-1.17528	A0A3B6LND2	Aamy domain-containing protein		7	3	776	86.2	6.6
1.55661	0.0277582	-1.18224	A0A3B6JBK6	C2 domain-containing protein		18	3	324	32.5	6.38
1.35737	0.0439169	-1.2045	A0A077RSA7	Uncharacterized protein	TRAES_3BF042100050CFD_c1	12	3	389	44.9	5.4		membrane	metal ion binding
1.48226	0.0329411	-1.21473	A0A3B6H4D5	Uncharacterized protein		11	4	577	64.4	6.19
3.31	0.000489783	-1.21622	A0A3B6EF16	DUF1421 domain-containing protein		16	6	603	63.9	6.24
1.75831	0.0174458	-1.22421	A0A3B6TBM9	Uncharacterized protein		5	2	820	88.9	5.05
1.6844	0.0206826	-1.22826	A0A3B6MLZ1	Uncharacterized protein		7	2	537	59.1	6.01
1.70877	0.0195538	-1.23015	A0A3B6HVZ2	Uncharacterized protein		3	3	838	93.9	6.33
1.45022	0.0354637	-1.23163	Q8VX49	NADPH--cytochrome P450 reductase (CPR) (P450R) (EC 1.6.2.4)	r2	9	4	703	77.4	5.72	metabolic process	cytoplasm;endoplasmic reticulum;membrane	catalytic activity;nucleotide binding
2.07083	0.00849511	-1.23265	A0A1D6BVX7	Protein kinase domain-containing protein		17	3	326	36.9	8.62	metabolic process		catalytic activity;nucleotide binding
1.3341	0.0463344	-1.24235	A0A3B6C3N8	Uncharacterized protein		5	2	516	57.4	9.36
1.82313	0.015027	-1.24732	A0A3B6AXN6	Nup54 domain-containing protein		19	5	392	42.5	7.4
1.31463	0.0484589	-1.26405	A0A2X0TJ32	Uncharacterized protein	CAMPLR22A2D_LOCUS1419	6	4	1006	112.9	6.46
2.91277	0.00122245	-1.27153	A0A3B5XVG6	Mitogen-activated protein kinase (EC 2.7.11.24)		8	3	549	62.3	8.53
1.3405	0.0456565	-1.27246	A0A3B5XVY2	J domain-containing protein		16	3	350	39.3	6.74
2.19059	0.00644774	-1.29934	I3NM30	Putative non-cyanogenic beta-glucosidase	4N5.4	40	13	507	56.4	8.98	metabolic process		catalytic activity;protein binding
1.33713	0.0460114	-1.31571	A0A3B6KAY9	HMA domain-containing protein		14	2	337	36.6	6.37
1.34281	0.0454135	-1.32819	A0A3B6S8U6	Uncharacterized protein		36	7	262	28.3	6.46
1.90317	0.0124976	-1.33133	A0A3B6B3U7	Sucrose synthase (EC 2.4.1.13)		21	12	864	98.8	8.29
1.62023	0.0239758	-1.3328	A0A3B6EH00	Uncharacterized protein		14	2	194	21.2	9.52
2.01871	0.00957837	-1.33581	A0A3B6B4X4	Uncharacterized protein		15	9	739	81.3	5.05
1.74587	0.0179526	-1.33959	W5EH87	Uncharacterized protein		41	5	184	20.7	9.04	regulation of biological process;response to stimulus		catalytic activity;nucleotide binding;protein binding;signal transducer activity
2.43536	0.00366978	-1.33976	A0A1B1QE97	CCD-B1		5	2	548	61.6	6.35	metabolic process		catalytic activity;metal ion binding
1.52074	0.0301483	-1.34364	A0A3B5Y0A8	Uncharacterized protein		5	8	2398	265.6	5.81
1.59358	0.0254931	-1.34785	A0A3B6C8K9	Cellulase domain-containing protein		6	2	582	63.9	5.86
1.9398	0.0114868	-1.35391	A0A3B6RAF6	Limit dextrinase type starch debranching enzyme		8	4	962	105.9	5.91
1.97606	0.0105668	-1.35748	A0A3B6B2J6	Uncharacterized protein		26	7	442	48.3	6.47
1.48474	0.0327535	-1.36352	A0A3B5ZXC3	Chitin-binding type-1 domain-containing protein		16	3	335	35	7.91
2.15281	0.00703384	-1.39459	A0A3B6RH96	Peroxidase (EC 1.11.1.7)		13	3	322	34.4	6.4
1.75458	0.0175961	-1.39916	A0A3B6JQ61	C-CAP/cofactor C-like domain-containing protein		15	3	338	36.8	6.46
1.59621	0.0253391	-1.40786	A0A3B5ZQ79	Uncharacterized protein		10	2	431	45.7	6.29
1.33139	0.046624	-1.42785	A0A3B6A2B6	AAA domain-containing protein		7	2	505	57.4	5.76
1.90405	0.0124725	-1.42889	A0A3B6S9N8	Uncharacterized protein		4	2	845	89.1	6.39
2.28445	0.00519452	-1.44417	A0A3B6THH5	RING-type E3 ubiquitin transferase (EC 2.3.2.27)		7	2	602	64.6	6.25
2.90695	0.00123894	-1.46248	A0A2X0S3J7	SUMO-activating enzyme subunit	CAMPLR22A2D_LOCUS1770	27	10	627	69.4	5.25
2.13063	0.00740238	-1.48568	A0A3B6RC76	AAA domain-containing protein		6	3	948	105.2	5.8
1.51005	0.0308995	-1.50119	A0A3B6B195	Uncharacterized protein		11	4	743	80.6	7.39
1.34069	0.0456362	-1.50613	A0A3B6IU05	Flavodoxin-like domain-containing protein		38	5	204	21.4	7.21
1.44885	0.0355754	-1.50996	A0A3B5Z2Y6	Uncharacterized protein		4	6	2014	230.2	7.17
1.65844	0.0219565	-1.5169	A0A3B6CE79	PPM-type phosphatase domain-containing protein		40	8	318	34.6	8.18
1.53408	0.0292362	-1.52689	A0A3B6HRZ3	Phosphoserine aminotransferase (EC 2.6.1.52)		31	9	416	44	8.59
1.73742	0.0183053	-1.53131	A0A3B6C1R6	Amine oxidase (EC 1.4.3.-)		8	3	733	81.1	7.44
3.29753	0.000504048	-1.54255	A0A3B6KPR4	Uncharacterized protein		23	8	765	78.7	7.53
1.88373	0.0130699	-1.54642	A0A3B6MNM8	AMP-binding domain-containing protein		19	9	698	76.7	6.62
1.46404	0.0343529	-1.55592	A0A3B6GWS2	Peroxidase (EC 1.11.1.7)		8	3	354	38.3	6.15
1.96598	0.0108148	-1.55626	W5D031	Uncharacterized protein	TRAES_3BF021500020CFD_c1	25	14	803	90.1	5.43	metabolic process		catalytic activity
1.61535	0.0242468	-1.56154	W5C5L5	Uncharacterized protein	CAMPLR22A2D_LOCUS1368	9	2	298	31.9	5.52	metabolic process		catalytic activity
1.36113	0.0435382	-1.56656	A0A3B6H106	Uncharacterized protein		8	2	380	42.1	8.95
2.0925	0.00808167	-1.57731	A0A3B5XWG8	HECT domain-containing protein		13	7	1030	117	6.92
1.52539	0.0298273	-1.59847	A0A3B6TWD9	EF-hand domain-containing protein		11	4	587	65	7.3
1.30791	0.049214	-1.60439	A0A3B6AZG2	Uncharacterized protein		6	2	540	59.8	5.06
1.92573	0.0118649	-1.61445	A0A3B6ER09	DEK_C domain-containing protein		9	3	467	52.2	9.01
1.58699	0.025883	-1.65076	A0A3B5YQA5	Phosphatidate cytidylyltransferase (EC 2.7.7.41)		7	2	431	49.6	9.14
2.32168	0.00476786	-1.65105	A0A3B6HZ73	Protein kinase domain-containing protein		12	2	321	36	7.17
2.09712	0.0079961	-1.66761	L7RYK4	Farnesyl pyrophosphate synthase (Farnesyl pyrophosphate synthase A1) (EC 2.5.1.10)		17	4	354	40.5	5.11	metabolic process		catalytic activity
1.95106	0.0111927	-1.67264	A0A3B6QLB4	Uncharacterized protein		28	8	457	48.6	4.98
1.40719	0.0391569	-1.67875	A0A3B6GS29	Uncharacterized protein		7	2	478	45.7	8.6
2.53394	0.00292457	-1.70436	A0A3B5XVY0	Uncharacterized protein		59	12	252	27	7.4
1.45632	0.0349684	-1.71002	A0A3B5ZQV8	Serine/threonine-protein phosphatase (EC 3.1.3.16)		20	2	261	29.3	5.3
1.85547	0.0139485	-1.7433	A0A3B6TCV0	Uncharacterized protein		4	2	514	57	9.28
2.31366	0.00485668	-1.74486	A0A3B5Y3E5	Uncharacterized protein		22	7	658	71.6	5.86
1.52981	0.0295253	-1.75764	A0A3B6PK37	Uncharacterized protein		6	2	549	61.2	6.43
1.46359	0.0343881	-1.75845	A0A3B6JP22	Uncharacterized protein		7	2	363	40.1	9.14
1.60285	0.0249545	-1.76214	A0A3B6SEX6	Acyl-coenzyme A oxidase		15	7	692	77.3	8.46
3.84458	0.000143028	-1.76216	A0A3B6LM78	Uncharacterized protein		16	6	515	58.4	7.93
1.8398	0.014461	-1.809	A0A1D5UPC7	Uncharacterized protein	CAMPLR22A2D_LOCUS2932	9	2	464	48.7	6.44		cytoplasm	catalytic activity;nucleotide binding
1.35279	0.0443826	-1.88737	A0A077RZ60	Uncharacterized protein	TRAES_3BF003800030CFD_c1 TRAES_3BF006100020CFD_c1	4	2	704	79.9	5.16	regulation of biological process
1.35285	0.0443762	-1.89674	A0A077RXT0	Uncharacterized protein	TRAES_3BF152900010CFD_c1	5	4	1783	203	7.11
2.43383	0.00368271	-1.92976	A0A3B6LVI2	Uncharacterized protein		7	2	458	49.7	7.05
1.46995	0.0338887	-1.94298	A0A3B6NMM5	Uncharacterized protein		2	4	3098	346.5	6.49
4.31743	4.81474e-05	-1.99138	A0A3B6MQV3	Uncharacterized protein		22	6	431	47	6.54
2.09024	0.00812381	-1.99713	A0A3B5ZT08	Uncharacterized protein		9	2	508	57.4	9.09
2.2827	0.00521558	-2.01792	A0A3B5Y4C6	Uncharacterized protein		6	4	881	97.1	6.71
1.59574	0.0253665	-2.02496	A0A3B6HQ31	Uncharacterized protein		6	3	676	74.7	5.82
1.9566	0.0110508	-2.02596	A0A3B6NQJ8	Uncharacterized protein		12	2	346	38.9	5.47
1.51249	0.0307265	-2.05352	A0A3B6QH86	Cytochrome b-c1 complex subunit Rieske, mitochondrial (EC 7.1.1.8)		21	5	270	29.6	8.07
1.74492	0.0179921	-2.07387	A0A3B6J080	Uncharacterized protein		20	3	341	35.6	6.25
1.97766	0.0105277	-2.07528	A0A3B6I134	Protein HIRA		4	2	997	109.1	7.36
1.44278	0.0360761	-2.10741	A0A3B6FTH5	Uncharacterized protein		4	2	800	87.5	6.68
1.48517	0.0327212	-2.10947	A0A3B6MN47	Uncharacterized protein		19	21	1759	192.8	6.6
1.62006	0.0239851	-2.11423	A0A3B6JF52	Lipoxygenase (EC 1.13.11.-)		51	33	878	99.3	6.52
1.66745	0.0215056	-2.1254	A0A3B6A2J8	Purple acid phosphatase (EC 3.1.3.2)		4	2	621	69.4	6.54
1.55212	0.0280469	-2.13151	A0A3B6B8A4	CULLIN_2 domain-containing protein		5	3	732	85	8.25
1.55559	0.0278236	-2.14992	A0A3B5ZUS4	Uncharacterized protein		16	2	262	28.2	8.88
1.50231	0.031455	-2.16175	A0A3B6CEJ9	Peroxidase (EC 1.11.1.7)		11	3	328	35.1	8.79
2.23093	0.00587581	-2.16344	A0A3B6NS85	HVA22-like protein		22	2	188	21.8	6.33
1.69255	0.0202979	-2.19809	A0A3B6B3B0	Uncharacterized protein		10	2	320	34.1	8.27
2.08	0.00831758	-2.20006	A0A3B6I6G4	Sucrose:fructan 6-fructosyltransferase		20	9	590	65.9	5.57
1.59799	0.0252352	-2.23021	A0A3B5Z386	Uncharacterized protein		3	2	1114	125.1	7.03
2.14284	0.00719718	-2.27186	A0A3B6TRJ7	Peptidase A1 domain-containing protein		6	2	503	52.6	8.16
2.16235	0.00688092	-2.27661	Q2QKB4	Splicing factor U2af large subunit B (U2 auxiliary factor 65 kDa subunit B) (U2 small nuclear ribonucleoprotein auxiliary factor large subunit B) (U2 snRNP auxiliary factor large subunit B)	U2AF65B U2AF65	22	6	543	60.5	7.71	metabolic process	nucleus	RNA binding
2.52655	0.00297477	-2.30919	A0A3B6SMV6	Uncharacterized protein		36	6	197	21.4	6.54
1.43615	0.0366308	-2.32904	A0A3B6MLK2	Guanylate kinase-like domain-containing protein		15	3	393	43.1	5.9
1.40923	0.0389739	-2.34436	A0A3B6KPM0	Uncharacterized protein		23	10	638	68.1	5.86
2.37011	0.00426469	-2.36433	A0A3B6H334	Uncharacterized protein		13	4	545	59.2	9.11
1.99784	0.0100498	-2.37398	A0A3B5Y4Y4	MATH domain-containing protein		3	2	1387	151.6	8.48
1.99784	0.0100498	-2.37398	A0A3B5ZX38	Rab-GAP TBC domain-containing protein		15	8	794	89.4	4.81
1.89756	0.0126601	-2.37721	W5D5R6	Cold induced protein	TRAES_3BF087500010CFD_c1	37	5	158	16.2	4.98
2.08119	0.00829479	-2.40292	A0A3B6EIF2	Uncharacterized protein		5	3	901	101.6	9.29
2.58962	0.00257266	-2.44831	A0A3B5ZRC9	Uncharacterized protein		16	5	435	47	5.68
2.07239	0.00846472	-2.47844	A0A077RZU1	Malic enzyme	TRAES_3BF016200050CFD_c1	16	6	593	65.7	6.28	metabolic process		catalytic activity;metal ion binding;nucleotide binding
1.37697	0.0419785	-2.50282	A0A3B6RAA4	Protein kinase domain-containing protein		3	3	1240	131.9	5.99
2.12338	0.00752699	-2.51184	A0A3B6FLT8	Importin N-terminal domain-containing protein		9	7	1061	120.2	6.35
1.9727	0.0106488	-2.51844	A0A3B6LXD3	DNA-directed RNA polymerase subunit (EC 2.7.7.6)		2	2	1666	186.4	7.03
1.55295	0.027993	-2.54005	A0A3B5Y671	Lipase_GDSL domain-containing protein		11	3	408	44.2	8.65
1.48663	0.0326118	-2.54875	A0A3B6EJB1	WD_REPEATS_REGION domain-containing protein		1	2	2451	267.6	6.71
2.947	0.00112979	-2.59063	A0A3B6MYV4	Uncharacterized protein		25	4	362	39.7	4.79
1.30439	0.0496142	-2.5976	A0A3B5Z2G6	Uncharacterized protein		32	7	314	33.4	5.31
1.44424	0.0359547	-2.60568	A0A3B6JIE0	Uncharacterized protein		7	8	1835	206.9	6.33
1.3027	0.0498084	-2.61723	A0A3B6EHX4	Uncharacterized protein		6	2	727	78.4	6.28
1.91375	0.012197	-2.62256	A0A077RNW9	PfkB domain-containing protein	TRAES_3BF060600270CFD_c1	45	11	312	33.5	5.4			catalytic activity
1.94186	0.0114325	-2.63797	A0A3B6QGW2	Cytosolic Fe-S cluster assembly factor NBP35	NBP35	34	7	348	37.1	5.14
1.73136	0.0185627	-2.64144	A0A3B5ZYP8	HECT domain-containing protein		2	2	1522	166.5	5.05
1.6208	0.023944	-2.65302	V9HVX5	Hypothetical HPS-like protein		23	2	144	14.6	7.64
2.013	0.00970502	-2.68989	A0A3B5ZW90	Lipase_3 domain-containing protein		13	3	433	47.4	6.96
1.65302	0.0222319	-2.70754	A0A3B6KRV1	Uncharacterized protein		25	2	134	14.6	4.7
2.03456	0.009235	-2.72532	A0A3B5Y5H6	Flap endonuclease 1 (FEN-1) (EC 3.1.-.-) (Flap structure-specific endonuclease 1)	FEN1	13	3	380	42.6	8.59
1.88193	0.0131243	-2.72629	A0A077RRL8	DNA-directed RNA polymerase subunit (EC 2.7.7.6)	TRAES_3BF116200100CFD_c1	2	2	1395	155	8.82	metabolic process		catalytic activity;DNA binding
1.64568	0.0226108	-2.7788	A0A3B6SDN7	Proteasome subunit alpha type (EC 3.4.25.1)		47	7	250	26.9	6.79
1.36406	0.0432453	-2.79811	A0A3B6TIP8	Uncharacterized protein		9	4	680	75.3	4.81
2.25056	0.00561614	-2.79873	W5D5D8	Uncharacterized protein	TRAES_3BF117700030CFD_c1	7	2	448	50.3	6.2		membrane
1.34837	0.0448362	-2.79993	A0A3B5YYZ7	Uncharacterized protein		11	2	293	32	5.34
3.28034	0.000524394	-2.8087	A0A3B6QDR7	Uncharacterized protein		6	2	507	55.9	8.5
1.77047	0.016964	-2.82668	A8DNN6	Cinnamoyl-CoA reductase (EC 1.2.1.44)		17	3	349	37.3	6.52	metabolic process		catalytic activity
2.25637	0.00554152	-2.86873	A0A3B6SM44	Uncharacterized protein		16	9	823	90.3	5.21
1.59805	0.0252317	-2.86924	A0A3B5Y7X6	CTP synthase (EC 6.3.4.2) (UTP--ammonia ligase)		5	2	604	66.1	8.22
1.57821	0.0264114	-2.87398	A0A0N7ILR9	Modifier of transcription 1-D1	MOT1-D1	1	2	2069	229.4	6.05			nucleotide binding;protein binding
1.63496	0.0231761	-2.91127	A0A3B6C770	Uncharacterized protein		4	2	771	81.1	7.91
1.51821	0.0303243	-2.93035	A0A3B6HTZ3	KOW domain-containing protein		27	2	159	17.6	10.11
2.09883	0.00796469	-2.93827	A0A3B6ED30	ABC transporter domain-containing protein		4	2	675	72.7	9.23
1.35358	0.044302	-2.94997	A0A3B6RJR6	Uncharacterized protein		9	3	449	48.5	5.55
2.35993	0.00436586	-2.95754	A0A3B6HUK1	Fe2OG dioxygenase domain-containing protein		14	3	313	34.8	4.96
3.04914	0.000893009	-2.96482	A0A3B6IQ99	Uncharacterized protein		11	3	450	50.5	5.81
2.00256	0.0099412	-2.96817	A0A3B6H114	CTLH domain-containing protein		8	2	386	43.6	6.15
1.69102	0.0203693	-2.97554	A0A3B6EQZ5	DNA polymerase (EC 2.7.7.7)		5	4	1539	170.3	6.89
2.21362	0.00611476	-2.98034	A0A1D6B2F7	Inhibitor_I29 domain-containing protein		14	2	245	27.7	8.6	metabolic process		catalytic activity
1.45282	0.0352519	-2.98133	A0A3B6AWS7	HRDC domain-containing protein		4	2	967	108.8	7.43
1.90354	0.012487	-2.98177	A0A3B6TB44	Uncharacterized protein		22	9	522	58.3	5.24
2.25827	0.00551734	-2.99112	A0A3B6MUV8	NAD(P)-bd_dom domain-containing protein		12	4	421	46.7	8.66
2.21867	0.00604407	-3.01077	A0A3B6DF42	Uncharacterized protein		21	7	563	59.2	8.19
1.35474	0.0441836	-3.01197	P01543	Acidic protein];Purothionin A-1 (Beta-purothionin) (Purothionin A-I) [Cleaved into: Purothionin A-1	THI1.3	11	2	136	14.6	5.07	defense response;response to stimulus	extracellular
1.95874	0.0109966	-3.03423	W5CPX4	PKS_ER domain-containing protein	TRAES_3BF082000040CFD_c1	16	4	354	38.5	6.4	metabolic process		catalytic activity;metal ion binding;nucleotide binding
1.76108	0.0173347	-3.05758	A0A3B6FQC9	Uncharacterized protein		3	2	935	104.1	5.26
2.36564	0.00430881	-3.093	A0A3B6PHC1	Uncharacterized protein		16	3	252	27.1	9.41
1.88965	0.0128928	-3.11741	A0A3B6B961	Uncharacterized protein		68	9	216	24.4	5.67
1.77103	0.0169421	-3.17043	A0A3B6SIU4	AAA domain-containing protein		5	2	673	71.8	5.94
1.75758	0.0174751	-3.1788	A0A3B5Y3H0	Uncharacterized protein		13	3	419	45.5	6.61
1.43634	0.0366147	-3.19474	A0A3B6SKK1	Uncharacterized protein		48	22	718	78.8	5.36
1.69381	0.0202393	-3.20776	A0A077RPZ8	Uncharacterized protein	TRAES_3BF134100010CFD_c1	25	2	165	19	4.82			metal ion binding
2.14829	0.00710733	-3.22285	A0A3B6B0N8	Uncharacterized protein		10	2	264	28.8	5.36
1.79751	0.0159399	-3.22442	A0A3B6AXX8	Helicase ATP-binding domain-containing protein		15	13	1256	136.5	6.98
1.79287	0.0161113	-3.22829	A0A077RYV4	Uncharacterized protein	TRAES_3BF068900080CFD_c1	9	2	401	45.8	8.28		membrane
2.66821	0.00214677	-3.23415	A0A3B6FYX2	Uncharacterized protein		13	3	282	31.4	5.9
1.40293	0.0395429	-3.26051	A0A3B5ZWE9	Hydrolase_4 domain-containing protein		6	2	590	64.7	7.24
2.70137	0.001989	-3.26102	A0A3B6KNI0	Phospholipase D (EC 3.1.4.4)		11	7	860	96.9	7.34
2.01048	0.00976156	-3.30629	A0A3B6IXZ4	Uncharacterized protein		4	2	1046	119.1	5.78
1.81942	0.0151559	-3.34352	A0A3B6JJC4	Fn3_like domain-containing protein		5	2	787	83.4	8.56
3.70361	0.000197873	-3.36293	A0A3B6B1Q4	Uncharacterized protein		7	2	508	57.5	5.92
2.36855	0.00428006	-3.37861	Q4KUK8	Cinnamoyl-CoA reductase (EC 1.2.1.44)		17	3	357	39.5	6.98	metabolic process		catalytic activity
2.52885	0.00295902	-3.37928	A0A3B6KL37	CN hydrolase domain-containing protein		29	6	411	45.6	6.48
1.99719	0.010065	-3.42564	A0A3B6SQ87	Uncharacterized protein		3	2	722	81.7	6.35
1.96945	0.0107289	-3.44551	A0A2X0S151	Uncharacterized protein	CAMPLR22A2D_LOCUS1098	19	3	381	39.8	9.19
2.50586	0.00311992	-3.48804	A0A3B6H4X8	Protein kinase domain-containing protein		3	2	949	104.2	5.88
2.75726	0.00174878	-3.51344	A0A3B6NP89	Uncharacterized protein		12	15	1828	207.1	5.5
2.15188	0.00704885	-3.53951	A0A3B6MRG8	Uncharacterized protein		12	4	691	76.2	6.95
1.59676	0.0253067	-3.5792	A0A3B6QBY7	Uncharacterized protein		23	3	238	26.6	5.71
1.34521	0.0451634	-3.58396	A0A3B6ILN9	C2 domain-containing protein		3	4	2137	229.1	5.38
4.25205	5.5969e-05	-3.584	A0A3B6D949	Peroxidase (EC 1.11.1.7)		6	2	428	45.3	8
3.55643	0.000277699	-3.62324	A0A3B6FQ67	HTH arsR-type domain-containing protein		3	4	2682	302.8	7.99
3.11311	0.000770709	-3.62949	A0A3B6HSE4	Uncharacterized protein		5	2	590	64.7	7.59
2.34763	0.00449128	-3.65468	A0A3B6LMT5	Uncharacterized protein		9	3	473	51.2	5.62
2.61409	0.00243168	-3.66232	A0A3B6FHZ6	BOWMAN_BIRK domain-containing protein		16	2	219	23.7	5.57
1.95466	0.0111003	-3.71367	A0A3B6KM07	Hydrolase_4 domain-containing protein		7	2	373	41.7	6.54
1.88344	0.0130787	-3.74975	A0A3B6TZ27	Protein kinase domain-containing protein		9	2	309	35.2	5.19
1.63833	0.0229969	-3.78155	A0A3B6FZB8	Protein kinase domain-containing protein		3	2	871	95.3	5.88
1.94321	0.0113971	-3.78603	A0A3B6HQQ5	Conserved oligomeric Golgi complex subunit 6 (COG complex subunit 6) (Component of oligomeric Golgi complex 6)		16	7	689	76.8	6.25
2.19263	0.00641755	-3.81729	A0A3B6C0P6	THUMP domain-containing protein		18	5	431	47.5	5.4
2.16431	0.00685003	-3.84179	A0A3B6KTZ8	Uncharacterized protein		19	4	269	29.2	8.72
1.41422	0.0385282	-3.98189	A0A3B6U5Q8	Uncharacterized protein		12	2	326	36.5	4.51
2.88652	0.00129861	-4.00938	A0A3B6LU94	Uncharacterized protein		25	4	362	39.7	4.81
1.42718	0.0373959	-4.09371	A0A3B6ETU6	Uncharacterized protein		51	11	356	38.5	6.19
1.99666	0.0100772	-4.11218	A0A3B6JG50	Phytochrome		2	2	1134	125.5	5.8
3.61972	0.000240037	-4.12532	A0A3B6SJW9	Uncharacterized protein		7	2	549	59.8	5.92
1.3813	0.0415625	-4.15088	A0A3B6RPD9	Uncharacterized protein		5	2	464	51.3	7.17
2.35703	0.00439512	-4.15357	A0A3B6DIH9	Uncharacterized protein		20	2	171	17.3	9.99
2.21506	0.0060945	-4.22142	A0A3B6C847	PLAT domain-containing protein		24	4	255	27.4	6.96
1.9865	0.0103158	-4.24202	A0A341TZI3	W2 domain-containing protein		52	19	412	47.3	5.36
1.8066	0.01561	-4.28004	A0A3B6B5K4	DWARF1	D1	6	2	468	53.4	9.14
2.22432	0.00596589	-4.2833	A0A3B6NRI7	Uncharacterized protein		9	4	523	59.5	8.78
2.04399	0.00903663	-4.33056	A0A3B6EMN9	Uncharacterized protein		9	3	548	59.7	9.1
1.96663	0.0107986	-4.35613	A0A7H4LNC3			29	3	160	17	5.31
3.51044	0.000308719	-4.4457	A0A3B6U0I3	Sucrose synthase (EC 2.4.1.13)		15	9	861	98.4	8.38
1.39298	0.040459	-4.49561	A0A3B6GY57	Delta-1-pyrroline-5-carboxylate synthase [Includes: Glutamate 5-kinase (GK) (EC 2.7.2.11) (Gamma-glutamyl kinase);Gamma-glutamyl phosphate reductase (GPR) (EC 1.2.1.41) (Glutamate-5-semialdehyde dehydrogenase) (Glutamyl-gamma-semialdehyde dehydrogenase)]		2	2	687	74.4	6.28
1.7306	0.0185952	-4.52864	A0A3B6RFE5	TPT domain-containing protein		8	3	385	42.3	9.5
1.61075	0.0245049	-4.58641	Q9FXQ8	TaWIN2	TaWIN2	49	12	259	28.7	4.89			protein binding
3.41022	0.00038885	-5.24054	A0A3B6INV1	Fn3_like domain-containing protein		3	2	783	83.7	6.24
3.34808	0.000448664	-5.41867	A0A3B6MPJ3	Uncharacterized protein		3	3	1431	160.8	7.2
